# Supplementary material for: Redox-induced umpolung of transition metal carbenes
Source: PubMed Central journal article supplement (PMC5633845; doi:10.1039/c5sc02859k), 2015-09-25
Supplement: SC-006-C5SC02859K-s002.pdf [file SC-006-C5SC02859K-s002.pdf]

Electronic Supporting information for:

## Redox-Induced Umpolung of Transition Metal Carbenes

Peng Cui and Vlad M. Iluc\*

DEPARTMENT OF CHEMISTRY AND BIOCHEMISTRY, UNIVERSITY OF NOTRE DAME, NOTRE DAME, IN 46556

\*Corresponding author: viluc@nd.edu

|          |                                                                                                                                                                                                                                   |            |
|----------|-----------------------------------------------------------------------------------------------------------------------------------------------------------------------------------------------------------------------------------|------------|
| <b>1</b> | <b>X-ray data for compounds 4-6, 8-12</b>                                                                                                                                                                                         | <b>S4</b>  |
| <b>2</b> | <b>EPR Spectra</b>                                                                                                                                                                                                                | <b>S6</b>  |
|          | Figure S1. EPR spectrum of $[\{\text{PC}^{\bullet}(\text{sp}^2)\text{P}\}^{\text{tBu}}\text{PdI}]$ ( <b>4</b> )                                                                                                                   | S6         |
| <b>3</b> | <b>DFT Results</b>                                                                                                                                                                                                                | <b>S7</b>  |
|          | Figure S2. Computed molecules                                                                                                                                                                                                     | S7         |
| 3.1      | $[\{\text{PC}^{\bullet}(\text{sp}^2)\text{P}\}^{\text{tBu}}\text{PdI}]$ ( <b>4</b> )                                                                                                                                              | S7         |
|          | Table S1. Optimized coordinates for $[\{\text{PC}^{\bullet}(\text{sp}^2)\text{P}\}^{\text{tBu}}\text{PdI}]$ ( <b>4</b> )                                                                                                          | S7         |
|          | Figure S3. Overlaid structures for $[\{\text{PC}^{\bullet}(\text{sp}^2)\text{P}\}^{\text{tBu}}\text{PdI}]$ ( <b>4</b> ) (red: X-ray, blue: optimized)                                                                             | S9         |
|          | Table S2. Selected distances (Å) and angles (°) for the optimized geometry and the crystal structure of $[\{\text{PC}^{\bullet}(\text{sp}^2)\text{P}\}^{\text{tBu}}\text{PdI}]$ ( <b>4</b> )                                      | S10        |
|          | Figure S4. Optimized geometry for $[\{\text{PC}^{\bullet}(\text{sp}^2)\text{P}\}^{\text{tBu}}\text{PdI}]$ ( <b>4</b> )                                                                                                            | S10        |
| 3.2      | $[\{\text{PC}(\text{sp}^2)\text{P}\}^{\text{tBu}}\text{PdI}][\text{BAr}_4^{\text{F}}]$ ( <b>5</b> )                                                                                                                               | S11        |
|          | Table S3. Optimized coordinates for the complex cation of $[\{\text{PC}(\text{sp}^2)\text{P}\}^{\text{tBu}}\text{PdI}][\text{BAr}_4^{\text{F}}]$ ( <b>5</b> )                                                                     | S11        |
|          | Figure S5. Overlaid structures for the complex cation of $[\{\text{PC}(\text{sp}^2)\text{P}\}^{\text{tBu}}\text{PdI}][\text{BAr}_4^{\text{F}}]$ ( <b>5</b> ) (red: X-ray, blue: optimized)                                        | S13        |
|          | Table S4. Selected distances (Å) and angles (°) for the optimized geometry and the crystal structure of the complex cation of $[\{\text{PC}(\text{sp}^2)\text{P}\}^{\text{tBu}}\text{PdI}][\text{BAr}_4^{\text{F}}]$ ( <b>5</b> ) | S14        |
|          | Figure S6. Optimized geometry for the complex cation of $[\{\text{PC}(\text{sp}^2)\text{P}\}^{\text{tBu}}\text{PdI}][\text{BAr}_4^{\text{F}}]$ ( <b>5</b> )                                                                       | S14        |
| 3.3      | $[\{\text{PC}(\text{sp}^2)\text{P}\}^{\text{Me}}\text{PdI}]^+$ ( <b>5'</b> )                                                                                                                                                      | S15        |
|          | Table S5. Optimized coordinates for $[\{\text{PC}(\text{sp}^2)\text{P}\}^{\text{Me}}\text{PdI}]^+$ ( <b>5'</b> )                                                                                                                  | S15        |
|          | Figure S7. Optimized geometry for $[\{\text{PC}(\text{sp}^2)\text{P}\}^{\text{Me}}\text{PdI}]^+$ ( <b>5'</b> )                                                                                                                    | S16        |
| <b>4</b> | <b>NMR Spectra</b>                                                                                                                                                                                                                | <b>S17</b> |
| 4.1      | NMR Spectra for $[\{\text{PC}(\text{sp}^2)\text{P}\}^{\text{tBu}}\text{PdI}][\text{BAr}_4^{\text{F}}]$ ( <b>5</b> )                                                                                                               | S17        |
|          | Figure S8. $^1\text{H}$ NMR spectrum for $[\{\text{PC}(\text{sp}^2)\text{P}\}^{\text{tBu}}\text{PdI}][\text{BAr}_4^{\text{F}}]$ ( <b>5</b> )                                                                                      | S17        |
|          | Figure S9. $^{31}\text{P}\{^1\text{H}\}$ NMR spectrum for $[\{\text{PC}(\text{sp}^2)\text{P}\}^{\text{tBu}}\text{PdI}][\text{BAr}_4^{\text{F}}]$ ( <b>5</b> )                                                                     | S18        |
|          | Figure S10. $^{13}\text{C}\{^1\text{H}\}$ NMR spectrum for $[\{\text{PC}(\text{sp}^2)\text{P}\}^{\text{tBu}}\text{PdI}][\text{BAr}_4^{\text{F}}]$ ( <b>5</b> )                                                                    | S19        |
|          | Figure S11. $^{19}\text{F}$ NMR spectrum for $[\{\text{PC}(\text{sp}^2)\text{P}\}^{\text{tBu}}\text{PdI}][\text{BAr}_4^{\text{F}}]$ ( <b>5</b> )                                                                                  | S20        |
|          | Figure S12. $^{11}\text{B}$ NMR spectrum for $[\{\text{PC}(\text{sp}^2)\text{P}\}^{\text{tBu}}\text{PdI}][\text{BAr}_4^{\text{F}}]$ ( <b>5</b> )                                                                                  | S21        |
| 4.2      | NMR Spectra for $[\{\text{PC}(\text{sp}^3)\text{HP}\}^{\text{tBu}}\text{PdI}]$ ( <b>6</b> )                                                                                                                                       | S22        |
|          | Figure S13. $^1\text{H}$ NMR spectrum for $[\{\text{PC}(\text{sp}^3)\text{HP}\}^{\text{tBu}}\text{PdI}]$ ( <b>6</b> )                                                                                                             | S22        |
|          | Figure S14. $^{31}\text{P}\{^1\text{H}\}$ NMR spectrum for $[\{\text{PC}(\text{sp}^3)\text{HP}\}^{\text{tBu}}\text{PdI}]$ ( <b>6</b> )                                                                                            | S23        |
|          | Figure S15. $^{13}\text{C}\{^1\text{H}\}$ NMR spectrum for $[\{\text{PC}(\text{sp}^3)\text{HP}\}^{\text{tBu}}\text{PdI}]$ ( <b>6</b> )                                                                                            | S24        |
| 4.3      | NMR Spectra for $[\{\text{PC}(\text{sp}^3)(\text{SPh})\text{P}\}^{\text{tBu}}\text{PdI}]$ ( <b>7</b> )                                                                                                                            | S25        |
|          | Figure S16. $^1\text{H}$ NMR spectrum for $[\{\text{PC}(\text{sp}^3)(\text{SPh})\text{P}\}^{\text{tBu}}\text{PdI}]$ ( <b>7</b> )                                                                                                  | S25        |
|          | Figure S17. $^{31}\text{P}\{^1\text{H}\}$ NMR spectrum for $[\{\text{PC}(\text{sp}^3)(\text{SPh})\text{P}\}^{\text{tBu}}\text{PdI}]$ ( <b>7</b> )                                                                                 | S26        |
|          | Figure S18. $^{13}\text{C}\{^1\text{H}\}$ NMR spectrum for $[\{\text{PC}(\text{sp}^3)(\text{SPh})\text{P}\}^{\text{tBu}}\text{PdI}]$ ( <b>7</b> )                                                                                 | S27        |
| 4.4      | NMR Spectra for $[\{\text{PC}(\text{sp}^3)(\text{SPh})\text{P}\}^{\text{tBu}}\text{PdOTf}]$ ( <b>8</b> )                                                                                                                          | S28        |
|          | Figure S19. $^1\text{H}$ NMR spectrum for $[\{\text{PC}(\text{sp}^3)(\text{SPh})\text{P}\}^{\text{tBu}}\text{PdOTf}]$ ( <b>8</b> )                                                                                                | S28        |
|          | Figure S20. $^{31}\text{P}\{^1\text{H}\}$ NMR spectrum for $[\{\text{PC}(\text{sp}^3)(\text{SPh})\text{P}\}^{\text{tBu}}\text{PdOTf}]$ ( <b>8</b> )                                                                               | S29        |
|          | Figure S21. $^{13}\text{C}\{^1\text{H}\}$ NMR spectrum for $[\{\text{PC}(\text{sp}^3)(\text{SPh})\text{P}\}^{\text{tBu}}\text{PdOTf}]$ ( <b>8</b> )                                                                               | S30        |

|          |                                                                                                                                                                                                      |            |
|----------|------------------------------------------------------------------------------------------------------------------------------------------------------------------------------------------------------|------------|
|          | <b>Figure S22.</b> $^{19}\text{F}$ NMR spectrum for $[\{\text{PC}(\text{sp}^3)(\text{SPh})\text{P}\}^{\text{tBu}}\text{PdOTf}]$ ( <b>8</b> ) . . . . .                                               | S31        |
| 4.5      | NMR Spectra for $[\{\text{PC}(\text{sp}^3)(\text{SPh})\text{P}\}^{\text{tBu}}\text{PdSPh}]$ ( <b>9</b> ) . . . . .                                                                                   | S32        |
|          | <b>Figure S23.</b> $^1\text{H}$ NMR spectrum for $[\{\text{PC}(\text{sp}^3)(\text{SPh})\text{P}\}^{\text{tBu}}\text{PdSPh}]$ ( <b>9</b> ) . . . . .                                                  | S32        |
|          | <b>Figure S24.</b> $^{31}\text{P}\{^1\text{H}\}$ NMR spectrum for $[\{\text{PC}(\text{sp}^3)(\text{SPh})\text{P}\}^{\text{tBu}}\text{PdSPh}]$ ( <b>9</b> ) . . . . .                                 | S33        |
|          | <b>Figure S25.</b> $^{13}\text{C}\{^1\text{H}\}$ NMR spectrum for $[\{\text{PC}(\text{sp}^3)(\text{SPh})\text{P}\}^{\text{tBu}}\text{PdSPh}]$ ( <b>9</b> ) . . . . .                                 | S34        |
| 4.6      | NMR Spectra for $[\{\text{PC}(\text{sp}^3)(\text{NH}^p\text{Tol})\text{P}\}^{\text{tBu}}\text{PdI}]$ ( <b>10</b> ) . . . . .                                                                         | S35        |
|          | <b>Figure S26.</b> $^1\text{H}$ NMR spectrum for $[\{\text{PC}(\text{sp}^3)(\text{NH}^p\text{Tol})\text{P}\}^{\text{tBu}}\text{PdI}]$ ( <b>10</b> ) . . . . .                                        | S35        |
|          | <b>Figure S27.</b> $^{31}\text{P}\{^1\text{H}\}$ NMR spectrum for $[\{\text{PC}(\text{sp}^3)(\text{NH}^p\text{Tol})\text{P}\}^{\text{tBu}}\text{PdI}]$ ( <b>10</b> ) . . . . .                       | S36        |
|          | <b>Figure S28.</b> $^{13}\text{C}\{^1\text{H}\}$ NMR spectrum for $[\{\text{PC}(\text{sp}^3)(\text{NH}^p\text{Tol})\text{P}\}^{\text{tBu}}\text{PdI}]$ ( <b>10</b> ) . . . . .                       | S37        |
|          | <b>Figure S29.</b> $^1\text{H}$ - $^{13}\text{C}$ HSQC NMR spectrum for $[\{\text{PC}(\text{sp}^3)(\text{NH}^p\text{Tol})\text{P}\}^{\text{tBu}}\text{PdI}]$ ( <b>10</b> ) . . . . .                 | S38        |
|          | <b>Figure S30.</b> Variable temperature $^{31}\text{P}\{^1\text{H}\}$ NMR spectra for $[\{\text{PC}(\text{sp}^3)(\text{NH}^p\text{Tol})\text{P}\}^{\text{tBu}}\text{PdI}]$ ( <b>10</b> ) . . . . .   | S39        |
| 4.7      | NMR Spectra for $[\{\text{PC}(\text{sp}^3)(\text{OPh})\text{P}\}^{\text{tBu}}\text{PdI}]$ ( <b>11</b> ) . . . . .                                                                                    | S40        |
|          | <b>Figure S31.</b> $^1\text{H}$ NMR spectrum for $[\{\text{PC}(\text{sp}^3)(\text{OPh})\text{P}\}^{\text{tBu}}\text{PdI}]$ ( <b>11</b> ) . . . . .                                                   | S40        |
|          | <b>Figure S32.</b> $^{31}\text{P}\{^1\text{H}\}$ NMR spectrum for $[\{\text{PC}(\text{sp}^3)(\text{OPh})\text{P}\}^{\text{tBu}}\text{PdI}]$ ( <b>11</b> ) . . . . .                                  | S41        |
|          | <b>Figure S33.</b> $^{13}\text{C}\{^1\text{H}\}$ NMR spectrum for $[\{\text{PC}(\text{sp}^3)(\text{OPh})\text{P}\}^{\text{tBu}}\text{PdI}]$ ( <b>11</b> ) . . . . .                                  | S42        |
|          | <b>Figure S34.</b> Variable temperature $^{31}\text{P}\{^1\text{H}\}$ NMR spectra for $[\{\text{PC}(\text{sp}^3)(\text{OPh})\text{P}\}^{\text{tBu}}\text{PdI}]$ ( <b>11</b> ) . . . . .              | S43        |
| 4.8      | NMR Spectra for $[\{\text{PC}(\text{sp}^3)(\text{PMe}_3)\text{P}\}^{\text{tBu}}\text{PdI}][\text{BAR}_4^{\text{F}}]$ ( <b>12</b> ) . . . . .                                                         | S44        |
|          | <b>Figure S35.</b> $^1\text{H}$ NMR spectrum for $[\{\text{PC}(\text{sp}^3)(\text{PMe}_3)\text{P}\}^{\text{tBu}}\text{PdI}][\text{BAR}_4^{\text{F}}]$ ( <b>12</b> ) . . . . .                        | S44        |
|          | <b>Figure S36.</b> $^{31}\text{P}\{^1\text{H}\}$ NMR spectrum for $[\{\text{PC}(\text{sp}^3)(\text{PMe}_3)\text{P}\}^{\text{tBu}}\text{PdI}][\text{BAR}_4^{\text{F}}]$ ( <b>12</b> ) . . . . .       | S45        |
|          | <b>Figure S37.</b> $^{13}\text{C}\{^1\text{H}\}$ NMR spectrum for $[\{\text{PC}(\text{sp}^3)(\text{PMe}_3)\text{P}\}^{\text{tBu}}\text{PdI}][\text{BAR}_4^{\text{F}}]$ ( <b>12</b> ) . . . . .       | S46        |
|          | <b>Figure S38.</b> $^{19}\text{F}$ NMR spectrum for $[\{\text{PC}(\text{sp}^3)(\text{PMe}_3)\text{P}\}^{\text{tBu}}\text{PdI}][\text{BAR}_4^{\text{F}}]$ ( <b>12</b> ) . . . . .                     | S47        |
|          | <b>Figure S39.</b> $^{11}\text{B}$ NMR spectrum for $[\{\text{PC}(\text{sp}^3)(\text{PMe}_3)\text{P}\}^{\text{tBu}}\text{PdI}][\text{BAR}_4^{\text{F}}]$ ( <b>12</b> ) . . . . .                     | S48        |
|          | <b>Figure S40.</b> $^1\text{H}$ - $^{13}\text{C}$ HSQC NMR spectrum for $[\{\text{PC}(\text{sp}^3)(\text{PMe}_3)\text{P}\}^{\text{tBu}}\text{PdI}][\text{BAR}_4^{\text{F}}]$ ( <b>12</b> ) . . . . . | S49        |
| 4.9      | NMR Spectra for the comproportionation reaction between <b>3</b> and <b>5</b> . . . . .                                                                                                              | S50        |
|          | <b>Figure S41.</b> comproportionation reaction between <b>3</b> and <b>5</b> . . . . .                                                                                                               | S50        |
|          | <b>Figure S42.</b> $^1\text{H}$ NMR spectrum for the reaction mixture . . . . .                                                                                                                      | S51        |
|          | <b>Figure S43.</b> $^{31}\text{P}\{^1\text{H}\}$ NMR spectrum for the reaction mixture . . . . .                                                                                                     | S52        |
| <b>5</b> | <b>Crystallographic tables</b> . . . . .                                                                                                                                                             | <b>S53</b> |
| 5.1      | Crystal data for $[\{\text{PC}^*(\text{sp}^2)\text{P}\}^{\text{tBu}}\text{PdI}]$ ( <b>4</b> ) . . . . .                                                                                              | S53        |
|          | <b>Figure S44.</b> Thermal-ellipsoid representation of <b>4</b> . . . . .                                                                                                                            | S53        |
|          | <b>Table S6.</b> Crystal data and structure refinement for <b>4</b> . . . . .                                                                                                                        | S54        |
|          | <b>Table S7.</b> Atomic coordinates and equivalent isotropic displacement parameters ( $\text{\AA}^2$ ) for <b>4</b> . . . . .                                                                       | S55        |
|          | <b>Table S8.</b> Anisotropic displacement parameters ( $\text{\AA}^2$ ) for <b>4</b> . . . . .                                                                                                       | S58        |
|          | <b>Table S9.</b> Distances [ $\text{\AA}$ ] for <b>4</b> . . . . .                                                                                                                                   | S59        |
|          | <b>Table S10.</b> Angles [ $^\circ$ ] for <b>4</b> . . . . .                                                                                                                                         | S61        |
| 5.2      | Crystal data for $[\{\text{PC}(\text{sp}^2)\text{P}\}^{\text{tBu}}\text{PdI}][\text{BAR}_4^{\text{F}}]$ ( <b>5</b> ) . . . . .                                                                       | S64        |
|          | <b>Figure S45.</b> Thermal-ellipsoid representation of <b>5</b> . . . . .                                                                                                                            | S64        |
|          | <b>Table S11.</b> Crystal data and structure refinement for <b>5</b> . . . . .                                                                                                                       | S65        |
|          | <b>Table S12.</b> Atomic coordinates and equivalent isotropic displacement parameters ( $\text{\AA}^2$ ) for <b>5</b> . . . . .                                                                      | S66        |
|          | <b>Table S13.</b> Anisotropic displacement parameters ( $\text{\AA}^2$ ) for <b>5</b> . . . . .                                                                                                      | S70        |
|          | <b>Table S14.</b> Distances [ $\text{\AA}$ ] for <b>5</b> . . . . .                                                                                                                                  | S73        |
|          | <b>Table S15.</b> Angles [ $^\circ$ ] for <b>5</b> . . . . .                                                                                                                                         | S75        |
| 5.3      | Crystal data for $[\{\text{PC}(\text{sp}^3)\text{HP}\}^{\text{tBu}}\text{PdI}]$ ( <b>6</b> ) . . . . .                                                                                               | S80        |
|          | <b>Figure S46.</b> Thermal-ellipsoid representation of <b>6</b> . . . . .                                                                                                                            | S80        |
|          | <b>Table S16.</b> Crystal data and structure refinement for <b>6</b> . . . . .                                                                                                                       | S81        |
|          | <b>Table S17.</b> Atomic coordinates and equivalent isotropic displacement parameters ( $\text{\AA}^2$ ) for <b>6</b> . . . . .                                                                      | S82        |
|          | <b>Table S18.</b> Anisotropic displacement parameters ( $\text{\AA}^2$ ) for <b>6</b> . . . . .                                                                                                      | S84        |
|          | <b>Table S19.</b> Distances [ $\text{\AA}$ ] for <b>6</b> . . . . .                                                                                                                                  | S85        |
|          | <b>Table S20.</b> Angles [ $^\circ$ ] for <b>6</b> . . . . .                                                                                                                                         | S86        |
| 5.4      | Crystal data for $[\{\text{PC}(\text{sp}^3)(\text{SPh})\text{P}\}^{\text{tBu}}\text{PdOTf}] \cdot \text{Et}_2\text{O}$ ( <b>8-Et<sub>2</sub>O</b> ) . . . . .                                        | S88        |
|          | <b>Figure S47.</b> Thermal-ellipsoid representation of <b>8-Et<sub>2</sub>O</b> . . . . .                                                                                                            | S88        |
|          | <b>Table S21.</b> Crystal data and structure refinement for <b>8-Et<sub>2</sub>O</b> . . . . .                                                                                                       | S89        |
|          | <b>Table S22.</b> Atomic coordinates and equivalent isotropic displacement parameters ( $\text{\AA}^2$ ) for <b>8-Et<sub>2</sub>O</b> . . . . .                                                      | S90        |

|     |                                                                                                                                                                      |      |
|-----|----------------------------------------------------------------------------------------------------------------------------------------------------------------------|------|
|     | <b>Table S23.</b> Anisotropic displacement parameters ( $\text{\AA}^2$ ) for <b>8-Et<sub>2</sub>O</b> . . . . .                                                      | S93  |
|     | <b>Table S24.</b> Distances [ $\text{\AA}$ ] for <b>8-Et<sub>2</sub>O</b> . . . . .                                                                                  | S95  |
|     | <b>Table S25.</b> Angles [ $^\circ$ ] for <b>8-Et<sub>2</sub>O</b> . . . . .                                                                                         | S97  |
| 5.5 | Crystal data for $[\{\text{PC}(\text{sp}^3)(\text{SPh})\text{P}\}^t\text{BuPdSPh}] \cdot \text{C}_5\text{H}_{12}$ ( <b>9-C<sub>5</sub>H<sub>12</sub></b> ) . . . . . | S100 |
|     | <b>Figure S48.</b> Thermal-ellipsoid representation of <b>9-C<sub>5</sub>H<sub>12</sub></b> . . . . .                                                                | S100 |
|     | <b>Table S26.</b> Crystal data and structure refinement for <b>9-C<sub>5</sub>H<sub>12</sub></b> . . . . .                                                           | S101 |
|     | <b>Table S27.</b> Atomic coordinates and equivalent isotropic displacement parameters ( $\text{\AA}^2$ ) for <b>9-C<sub>5</sub>H<sub>12</sub></b> . . . . .          | S102 |
|     | <b>Table S28.</b> Anisotropic displacement parameters ( $\text{\AA}^2$ ) for <b>9-C<sub>5</sub>H<sub>12</sub></b> . . . . .                                          | S105 |
|     | <b>Table S29.</b> Distances [ $\text{\AA}$ ] for <b>9-C<sub>5</sub>H<sub>12</sub></b> . . . . .                                                                      | S107 |
|     | <b>Table S30.</b> Angles [ $^\circ$ ] for <b>9-C<sub>5</sub>H<sub>12</sub></b> . . . . .                                                                             | S109 |
| 5.6 | Crystal data for $[\{\text{PC}(\text{sp}^3)(\text{NH}^p\text{Tol})\text{P}\}^t\text{BuPdI}]$ ( <b>10</b> ) . . . . .                                                 | S112 |
|     | <b>Figure S49.</b> Thermal-ellipsoid representation of <b>10</b> . . . . .                                                                                           | S112 |
|     | <b>Table S31.</b> Crystal data and structure refinement for <b>10</b> . . . . .                                                                                      | S113 |
|     | <b>Table S32.</b> Atomic coordinates and equivalent isotropic displacement parameters ( $\text{\AA}^2$ ) for <b>10</b> . . . . .                                     | S114 |
|     | <b>Table S33.</b> Anisotropic displacement parameters ( $\text{\AA}^2$ ) for <b>10</b> . . . . .                                                                     | S117 |
|     | <b>Table S34.</b> Distances [ $\text{\AA}$ ] for <b>10</b> . . . . .                                                                                                 | S118 |
|     | <b>Table S35.</b> Angles [ $^\circ$ ] for <b>10</b> . . . . .                                                                                                        | S120 |
| 5.7 | Crystal data for $[\{\text{PC}(\text{sp}^3)(\text{OPhP})\}^t\text{BuPdI}]$ ( <b>11</b> ) . . . . .                                                                   | S123 |
|     | <b>Figure S50.</b> Thermal-ellipsoid representation of <b>11</b> . . . . .                                                                                           | S123 |
|     | <b>Table S36.</b> Crystal data and structure refinement for <b>11</b> . . . . .                                                                                      | S124 |
|     | <b>Table S37.</b> Atomic coordinates and equivalent isotropic displacement parameters ( $\text{\AA}^2$ ) for <b>11</b> . . . . .                                     | S125 |
|     | <b>Table S38.</b> Anisotropic displacement parameters ( $\text{\AA}^2$ ) for <b>11</b> . . . . .                                                                     | S130 |
|     | <b>Table S39.</b> Distances [ $\text{\AA}$ ] for <b>11</b> . . . . .                                                                                                 | S132 |
|     | <b>Table S40.</b> Angles [ $^\circ$ ] for <b>11</b> . . . . .                                                                                                        | S135 |
| 5.8 | Crystal data for $[\{\text{PC}(\text{sp}^3)(\text{PMe}_3)\text{P}\}^t\text{BuPdI}][\text{BAR}_4^{\text{F}}]$ ( <b>12</b> ) . . . . .                                 | S140 |
|     | <b>Figure S51.</b> Thermal-ellipsoid representation of <b>12</b> . . . . .                                                                                           | S140 |
|     | <b>Table S41.</b> Crystal data and structure refinement for <b>12</b> . . . . .                                                                                      | S141 |
|     | <b>Table S42.</b> Atomic coordinates and equivalent isotropic displacement parameters ( $\text{\AA}^2$ ) for <b>12</b> . . . . .                                     | S142 |
|     | <b>Table S43.</b> Anisotropic displacement parameters ( $\text{\AA}^2$ ) for <b>12</b> . . . . .                                                                     | S149 |
|     | <b>Table S44.</b> Distances [ $\text{\AA}$ ] for <b>12</b> . . . . .                                                                                                 | S153 |
|     | <b>Table S45.</b> Angles [ $^\circ$ ] for <b>12</b> . . . . .                                                                                                        | S157 |

## 1 X-ray data for compounds 4-6, 8-12

**X-Ray crystal structure of  $[\{\text{PC}^{\text{(sp}^2\text{)}}\text{P}\}^{\text{tBu}}\text{PdI}]$  (4).** Single crystals were obtained as dark green blocks from a concentrated *n*-pentane solution at  $-35\text{ }^{\circ}\text{C}$  in the glovebox. Crystal and refinement data for **4**:  $\text{C}_{33}\text{H}_{52}\text{IP}_2\text{Pd}$ ;  $M_r = 743.99$ ; Orthorhombic; space group *Pbca*;  $a = 14.978(2)\text{ \AA}$ ;  $b = 16.438(3)\text{ \AA}$ ;  $c = 29.361(5)\text{ \AA}$ ;  $\alpha = 90^{\circ}$ ;  $\beta = 90^{\circ}$ ;  $\gamma = 90^{\circ}$ ;  $V = 7228.9(19)\text{ \AA}^3$ ;  $Z = 8$ ;  $T = 120(2)\text{ K}$ ;  $\lambda = 0.71073\text{ \AA}$ ;  $\mu = 1.474\text{ mm}^{-1}$ ;  $d_{\text{calc}} = 1.367\text{ g}\cdot\text{cm}^{-3}$ ; 141424 reflections collected; 6340 unique ( $R_{\text{int}} = 0.0644$ ); giving  $R_1 = 0.0290$ ,  $wR_2 = 0.0590$  for 5847 data with  $[I > 2\sigma(I)]$  and  $R_1 = 0.0343$ ,  $wR_2 = 0.0613$  for all 6340 data. Residual electron density ( $\text{e}^{-}\cdot\text{\AA}^{-3}$ ) max/min: 0.850/ $-0.569$ .

**X-Ray crystal structure of  $[\{\text{PC}(\text{sp}^2)\text{P}\}^{\text{tBu}}\text{PdI}][\text{BAR}_4^{\text{F}}]$  (5).** Single crystals were obtained as dark red blocks from a concentrated solution of diethyl ether layered with *n*-pentane at  $-35\text{ }^{\circ}\text{C}$  in the glovebox. Crystal and refinement data for **5**:  $\text{C}_{65}\text{H}_{64}\text{BF}_{24}\text{IP}_2\text{Pd}$ ;  $M_r = 1607.21$ ; Monoclinic; space group  $P2_1/n$ ;  $a = 14.0602(6)\text{ \AA}$ ;  $b = 28.6171(12)\text{ \AA}$ ;  $c = 16.9031(7)\text{ \AA}$ ;  $\alpha = 90^{\circ}$ ;  $\beta = 92.0331(16)^{\circ}$ ;  $\gamma = 90^{\circ}$ ;  $V = 6796.9(5)\text{ \AA}^3$ ;  $Z = 4$ ;  $T = 120(2)\text{ K}$ ;  $\lambda = 0.71073\text{ \AA}$ ;  $\mu = 0.879\text{ mm}^{-1}$ ;  $d_{\text{calc}} = 1.571\text{ g}\cdot\text{cm}^{-3}$ ; 119559 reflections collected; 11970 unique ( $R_{\text{int}} = 0.0438$ ); giving  $R_1 = 0.0320$ ,  $wR_2 = 0.0725$  for 10118 data with  $[I > 2\sigma(I)]$  and  $R_1 = 0.0412$ ,  $wR_2 = 0.0763$  for all 11970 data. Residual electron density ( $\text{e}^{-}\cdot\text{\AA}^{-3}$ ) max/min: 1.082/ $-0.735$ .

**X-Ray crystal structure of  $[\{\text{PC}(\text{sp}^3)\text{HP}\}^{\text{tBu}}\text{PdI}]$  (6).** Single crystals were obtained as pale yellow blocks by slow evaporation from a concentrated solution of *n*-pentane at room temperature in the glovebox. Crystal and refinement data for **6**:  $\text{C}_{33}\text{H}_{53}\text{IP}_2\text{Pd}$ ;  $M_r = 744.99$ ; Monoclinic; space group  $P2_1/c$ ;  $a = 12.8203(13)\text{ \AA}$ ;  $b = 14.8340(15)\text{ \AA}$ ;  $c = 19.1740(19)\text{ \AA}$ ;  $\alpha = 90^{\circ}$ ;  $\beta = 106.6410(15)^{\circ}$ ;  $\gamma = 90^{\circ}$ ;  $V = 3493.7(6)\text{ \AA}^3$ ;  $Z = 4$ ;  $T = 120(2)\text{ K}$ ;  $\lambda = 0.71073\text{ \AA}$ ;  $\mu = 1.525\text{ mm}^{-1}$ ;  $d_{\text{calc}} = 1.416\text{ g}\cdot\text{cm}^{-3}$ ; 63141 reflections collected; 6140 unique ( $R_{\text{int}} = 0.0317$ ); giving  $R_1 = 0.0245$ ,  $wR_2 = 0.0495$  for 5688 data with  $[I > 2\sigma(I)]$  and  $R_1 = 0.0278$ ,  $wR_2 = 0.0505$  for all 6140 data. Residual electron density ( $\text{e}^{-}\cdot\text{\AA}^{-3}$ ) max/min: 1.086/ $-1.021$ .

**X-Ray crystal structure of  $[\{\text{PC}(\text{sp}^3)(\text{SPh})\text{P}\}^{\text{tBu}}\text{PdOTf}]\cdot\text{Et}_2\text{O}$  (8-Et<sub>2</sub>O)** Single crystals were obtained as yellow blocks from a concentrated solution of diethyl ether at  $-35\text{ }^{\circ}\text{C}$  in the glovebox. Crystal and refinement data for **8-Et<sub>2</sub>O**:  $\text{C}_{44}\text{H}_{67}\text{F}_3\text{O}_4\text{P}_2\text{PdS}_2$ ;  $M_r = 949.44$ ; Orthorhombic; space group  $P2_12_12_1$ ;  $a = 14.0266(6)\text{ \AA}$ ;  $b = 15.2323(6)\text{ \AA}$ ;  $c = 21.3735(9)\text{ \AA}$ ;  $\alpha = 90^{\circ}$ ;  $\beta = 90^{\circ}$ ;  $\gamma = 90^{\circ}$ ;  $V = 4566.6(3)\text{ \AA}^3$ ;  $Z = 4$ ;  $T = 120(2)\text{ K}$ ;  $\lambda = 0.71073\text{ \AA}$ ;  $\mu = 0.620\text{ mm}^{-1}$ ;  $d_{\text{calc}} = 1.381\text{ g}\cdot\text{cm}^{-3}$ ; 77120 reflections collected; 9882 unique ( $R_{\text{int}} = 0.0493$ ); giving  $R_1 = 0.0260$ ,  $wR_2 = 0.0561$  for 8958 data with  $[I > 2\sigma(I)]$  and  $R_1 = 0.0331$ ,  $wR_2 = 0.0590$  for all 9882 data. Residual electron density ( $\text{e}^{-}\cdot\text{\AA}^{-3}$ ) max/min: 0.885/ $-0.528$ .

**X-Ray crystal structure of  $[\{\text{PC}(\text{sp}^3)(\text{SPh})\text{P}\}^{\text{tBu}}\text{PdSPh}]\cdot\text{C}_5\text{H}_{12}$  (9-C<sub>5</sub>H<sub>12</sub>).** Single crystals were obtained as yellow blocks from a concentrated solution of *n*-pentane at  $-35\text{ }^{\circ}\text{C}$  in the glovebox. Crystal and refinement data for **9-C<sub>5</sub>H<sub>12</sub>**:  $\text{C}_{50}\text{H}_{74}\text{P}_2\text{PdS}_2$ ;  $M_r = 907.55$ ; Monoclinic; space group  $P2_1/n$ ;  $a = 11.297(3)\text{ \AA}$ ;  $b = 11.590(3)\text{ \AA}$ ;  $c = 36.768(10)\text{ \AA}$ ;  $\alpha = 90^{\circ}$ ;  $\beta = 92.926(4)^{\circ}$ ;  $\gamma = 90^{\circ}$ ;  $V = 4808(2)\text{ \AA}^3$ ;  $Z = 4$ ;  $T = 120(2)\text{ K}$ ;  $\lambda = 0.71073\text{ \AA}$ ;  $\mu = 0.571\text{ mm}^{-1}$ ;  $d_{\text{calc}} = 1.254\text{ g}\cdot\text{cm}^{-3}$ ; 111329 reflections collected; 12309 unique ( $R_{\text{int}} = 0.0632$ ); giving  $R_1 = 0.0392$ ,  $wR_2 = 0.0754$  for 10029 data with  $[I > 2\sigma(I)]$  and  $R_1 = 0.0557$ ,  $wR_2 = 0.0807$  for all 12309 data. Residual electron density ( $\text{e}^{-}\cdot\text{\AA}^{-3}$ ) max/min: 1.121/ $-0.773$ .

**X-Ray crystal structure of  $[\{\text{PC}(\text{sp}^3)(\text{NH}^{\text{t}}\text{ol})\text{P}\}^{\text{tBu}}\text{PdI}]$  (10).** Single crystals were obtained as yellow blocks from a concentrated solution of *n*-pentane at  $-35\text{ }^{\circ}\text{C}$  in the glovebox. Crystal and refinement data for **10**:  $\text{C}_{40}\text{H}_{60}\text{INP}_2\text{Pd}$ ;  $M_r = 850.13$ ; Monoclinic; space group  $P2_1/n$ ;  $a = 17.0891(17)\text{ \AA}$ ;  $b = 14.0140(14)\text{ \AA}$ ;  $c = 18.4206(18)\text{ \AA}$ ;  $\alpha = 90^{\circ}$ ;  $\beta = 100.081(3)^{\circ}$ ;  $\gamma = 90^{\circ}$ ;  $V = 4343.4(7)\text{ \AA}^3$ ;  $Z = 4$ ;  $T = 120(2)\text{ K}$ ;  $\lambda = 0.71073\text{ \AA}$ ;  $\mu = 1.237\text{ mm}^{-1}$ ;  $d_{\text{calc}} = 1.300\text{ g}\cdot\text{cm}^{-3}$ ; 67692 reflections collected; 7652 unique ( $R_{\text{int}} = 0.0271$ ); giving  $R_1 = 0.0300$ ,  $wR_2 = 0.0772$  for 6972 data with  $[I > 2\sigma(I)]$  and  $R_1 = 0.0334$ ,  $wR_2 = 0.0792$  for all 7652 data. Residual electron density ( $\text{e}^{-}\cdot\text{\AA}^{-3}$ ) max/min: 1.637/ $-1.126$ .

**X-Ray crystal structure of  $[\{\text{PC}(\text{sp}^3)(\text{OPh})\text{P}\}^{\text{tBu}}\text{PdI}]$  (11).** Single crystals were obtained as yellow blocks by slow evaporation from a concentrated *n*-pentane solution at room temperature in the glovebox. Crystal and refinement data for **11**:  $\text{C}_{39}\text{H}_{57}\text{IOP}_2\text{Pd}$ ;  $M_r = 837.09$ ; Triclinic; space group  $P\bar{1}$ ;  $a = 11.8764(6)\text{ \AA}$ ;  $b = 14.4330(8)\text{ \AA}$ ;  $c = 25.1741(14)\text{ \AA}$ ;  $\alpha = 101.2966(16)^{\circ}$ ;  $\beta = 93.5784(16)^{\circ}$ ;  $\gamma = 111.2000(15)^{\circ}$ ;  $V = 3903.0(4)\text{ \AA}^3$ ;  $Z = 4$ ;  $T = 120(2)\text{ K}$ ;  $\lambda = 0.71073\text{ \AA}$ ;  $\mu = 1.376\text{ mm}^{-1}$ ;  $d_{\text{calc}} = 1.425\text{ g}\cdot\text{cm}^{-3}$ ; 95643 reflections collected; 13721 unique ( $R_{\text{int}} = 0.0511$ ); giving  $R_1 = 0.0389$ ,  $wR_2 = 0.0886$  for 11059 data with  $[I > 2\sigma(I)]$  and  $R_1 = 0.0556$ ,  $wR_2 = 0.0934$  for all 13721 data. Residual electron density ( $\text{e}^{-}\cdot\text{\AA}^{-3}$ ) max/min: 3.446/ $-2.064$ .

**X-Ray crystal structure of  $[\{\text{PC}(\text{sp}^3)(\text{PMe}_3)\text{P}\}^{\text{tBu}}\text{PdI}][\text{BAR}_4^{\text{F}}]$  (12).** Single crystals were obtained as yellow blocks from a concentrated solution of *n*-pentane layered with fluorobenzene at  $-35\text{ }^{\circ}\text{C}$  in the glovebox. Crystal

and refinement data for **12**: C<sub>68</sub>H<sub>72</sub>BF<sub>24</sub>IP<sub>3</sub>Pd; M<sub>r</sub> = 1682.28; Monoclinic; space group *P2*<sub>1</sub>; *a* = 10.0901(7) Å; *b* = 23.7955(17) Å; *c* = 31.205(2) Å; α = 90°; β = 90.532(2)°; γ = 90°; V = 7492.0(9) Å<sup>3</sup>; Z = 4; T = 120(2) K; λ = 0.71073 Å; μ = 0.822 mm<sup>-1</sup>; d<sub>calc</sub> = 1.491 g·cm<sup>-3</sup>; 134462 reflections collected; 25436 unique (R<sub>int</sub> = 0.0348); giving R<sub>1</sub> = 0.0632, wR<sub>2</sub> = 0.1651 for 24104 data with [I > 2σ(I)] and R<sub>1</sub> = 0.0658, wR<sub>2</sub> = 0.1675 for all 25436 data. Residual electron density (e<sup>-</sup>·Å<sup>-3</sup>) max/min: 2.325/-1.408.

## 2 EPR Spectra

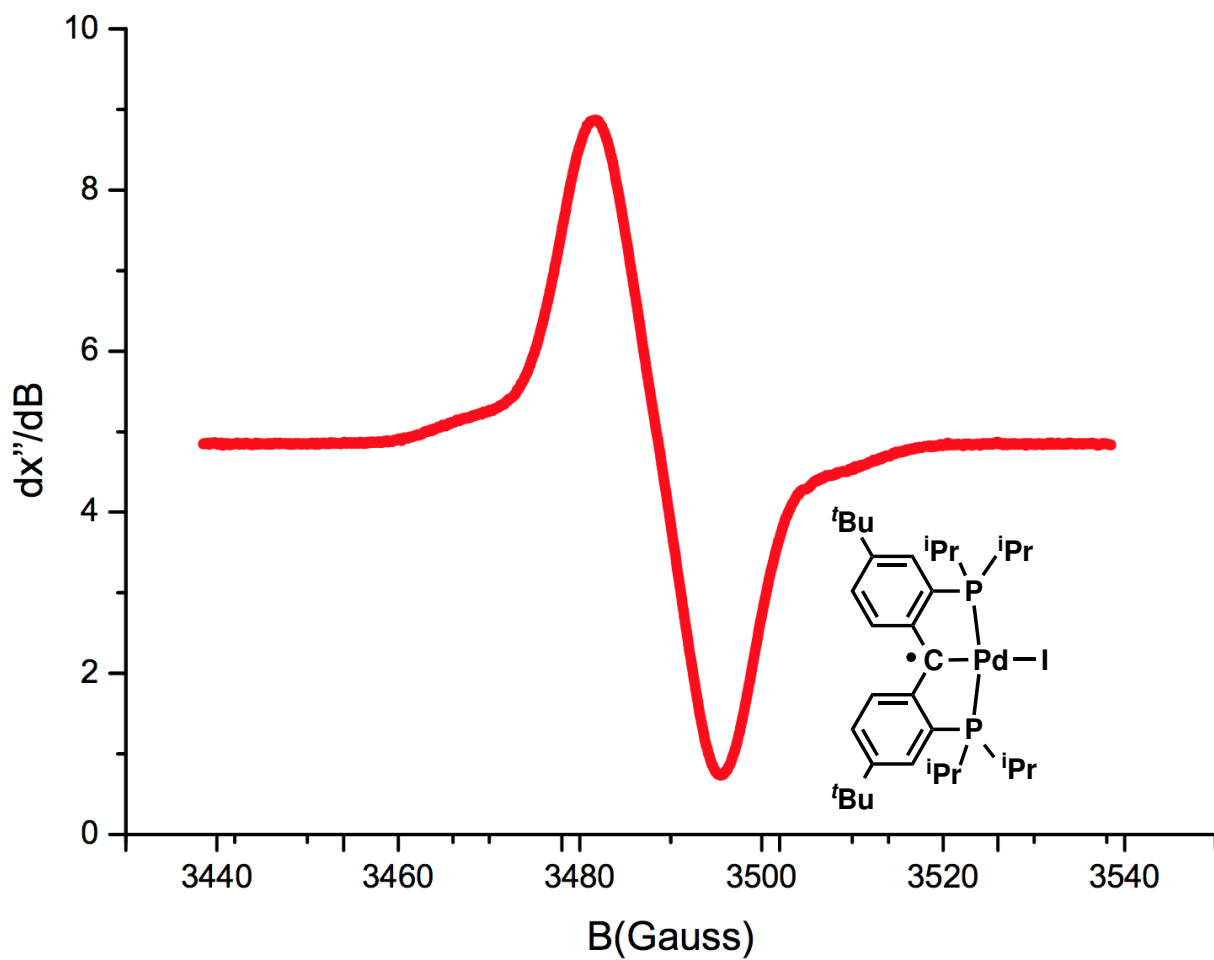

**Figure S1.** EPR spectrum of  $[(PC^*(sp^2)P)^{tBu}PdI]$  (**4**) (0.1 mM solution in toluene, 298 K),  $\Delta H_{pp} = 10.0$  G;  $g = 2.000$ .

### 3 DFT Results

Gaussian 03 (revision D.02)<sup>1</sup> was used for all reported calculations. The B3LYP (DFT) method was used to carry out the geometry optimizations on model compounds specified in text using the LANL2DZ basis set. The validity of the true minima was checked by the absence of negative frequencies in the energy Hessian. Molecular orbitals as well as Mayer<sup>2</sup> and Wiberg<sup>3</sup> bond orders were obtained from single point computations performed on the optimized molecules using the same level of theory.

1. M. J. Frisch, G. W. Trucks, H. B. Schlegel, G. E. Scuseria, M. A. Robb, J. R. Cheeseman, J. A. Montgomery, T. Vreven, K. N. Kudin, J. C. Burant, J. M. Millam, S. S. Iyengar, J. Tomasi, V. Barone, B. Mennucci, M. Cossi, G. Scalmani, N. Rega, G. A. Petersson, H. Nakatsuji, M. Hada, M. Ehara, K. Toyota, R. Fukuda, J. Hasegawa, M. Ishida, T. Nakajima, Y. Honda, O. Kitao, H. Nakai, M. Klene, X. Li, J. E. Knox, H. P. Hratchian, J. B. Cross, V. Bakken, C. Adamo, J. Jaramillo, R. Gomperts, R. E. Stratmann, O. Yazyev, A. J. Austin, R. Cammi, C. Pomelli, J. W. Ochterski, P. Y. Ayala, K. Morokuma, G. A. Voth, P. Salvador, J. J. Dannenberg, V. G. Zakrzewski, S. Dapprich, A. D. Daniels, M. C. Strain, O. Farkas, D. K. Malick, A. D. Rabuck, K. Raghavachari, J. B. Foresman, J. V. Ortiz, Q. Cui, A. G. Baboul, S. Clifford, J. Cioslowski, B. B. Stefanov, G. Liu, A. Liashenko, P. Piskorz, I. Komaromi, R. L. Martin, D. J. Fox, T. Keith, M. A. Al-Laham, C. Y. Peng, A. Nanayakkara, M. Challacombe, P. M. W. Gill, B. Johnson, W. Chen, M. W. Wong, C. Gonzalez, and J. A. Pople, *Gaussian, Inc.*, Wallingford CT, 2004.
2. I. Mayer, *Chem. Phys. Lett.*, **1983**, 97, 270-274.
3. K. B. Wiberg, *Tetrahedron*, **1968**, 24, 1083-1096.

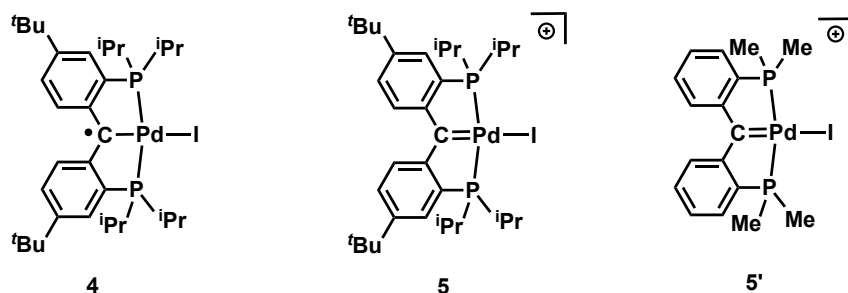

Figure S2. Computed molecules.

#### 3.1 $[\{PC^*(sp^2)P\}^tBuPdI]$ (4)

Table S1. Optimized coordinates for  $[\{PC^*(sp^2)P\}^tBuPdI]$  (4).

| atom | x        | y         | z         |
|------|----------|-----------|-----------|
| C    | 1.429743 | 2.912961  | -0.666313 |
| C    | 1.297677 | 1.578004  | -0.162495 |
| C    | 2.524473 | 0.893967  | 0.113058  |
| C    | 3.770022 | 1.527973  | -0.024852 |
| C    | 3.886672 | 2.860039  | -0.481347 |
| C    | 2.677555 | 3.522182  | -0.818607 |
| C    | 0.017692 | 0.888742  | 0.003533  |
| Pd   | 0.006986 | -1.161439 | -0.025823 |
| P    | 2.312060 | -0.910798 | 0.570582  |
| C    | 2.742706 | -1.093763 | 2.434191  |
| C    | 1.691938 | -0.347617 | 3.284924  |

Continued on next page

**Table S1.** – continued from previous page

| atom | x         | y         | z         |
|------|-----------|-----------|-----------|
| C    | 5.240627  | 3.583112  | -0.651288 |
| C    | 5.436779  | 3.973184  | -2.147090 |
| C    | 5.249243  | 4.874601  | 0.219717  |
| C    | 6.440721  | 2.702604  | -0.221453 |
| C    | 4.177738  | -0.647591 | 2.789701  |
| C    | -1.251270 | 1.595871  | 0.168582  |
| C    | -2.489693 | 0.935274  | -0.116163 |
| C    | -3.716955 | 1.616889  | -0.067542 |
| C    | -3.808825 | 2.965522  | 0.343857  |
| C    | -2.595595 | 3.594451  | 0.729358  |
| C    | -1.362457 | 2.944956  | 0.641547  |
| P    | -2.311428 | -0.886358 | -0.505205 |
| C    | -3.462908 | -1.871774 | 0.674266  |
| C    | -4.978061 | -1.674281 | 0.447680  |
| C    | -5.143042 | 3.739062  | 0.423056  |
| C    | -5.055964 | 5.015256  | -0.466254 |
| C    | -5.409455 | 4.160711  | 1.899203  |
| C    | -6.347087 | 2.894499  | -0.063530 |
| C    | -3.004390 | -1.116000 | -2.278551 |
| C    | -3.108728 | -2.609414 | -2.658333 |
| C    | -2.124268 | -0.336891 | -3.280378 |
| C    | -3.063731 | -1.588411 | 2.138963  |
| I    | -0.096297 | -3.948276 | -0.017221 |
| C    | 3.702698  | -1.821718 | -0.389449 |
| C    | 3.915628  | -3.261424 | 0.128116  |
| C    | 3.376005  | -1.804905 | -1.899639 |
| H    | -4.620609 | 1.086687  | -0.346505 |
| H    | -2.614354 | 4.614101  | 1.108403  |
| H    | -0.470348 | 3.465696  | 0.973009  |
| H    | -4.605018 | 4.794320  | 2.291717  |
| H    | -5.489474 | 3.279079  | 2.548325  |
| H    | -6.348507 | 4.726391  | 1.970245  |
| H    | -7.265255 | 3.492465  | -0.001516 |
| H    | -6.494122 | 1.999550  | 0.555350  |
| H    | -6.226515 | 2.577753  | -1.107882 |
| H    | -4.884128 | 4.748382  | -1.517102 |
| H    | -4.239654 | 5.675598  | -0.150103 |
| H    | -5.992745 | 5.585612  | -0.404725 |
| H    | 4.670330  | 0.968845  | 0.206672  |
| H    | 2.711421  | 4.531643  | -1.222926 |
| H    | 0.542522  | 3.450524  | -0.983250 |
| H    | 4.436781  | 5.556528  | -0.058463 |
| H    | 6.198536  | 5.412495  | 0.092461  |
| H    | 5.132656  | 4.629735  | 1.283456  |
| H    | 7.374049  | 3.266363  | -0.346437 |
| H    | 6.519524  | 1.794204  | -0.833007 |
| H    | 6.371287  | 2.405707  | 0.833395  |
| H    | 4.633335  | 4.628157  | -2.504931 |
| H    | 5.450801  | 3.079748  | -2.784646 |
| H    | 6.388639  | 4.505493  | -2.279389 |
| H    | -4.009635 | -0.667876 | -2.266758 |

Continued on next page



**Table S1.** – continued from previous page

| atom | x         | y         | z         |
|------|-----------|-----------|-----------|
| H    | -3.195453 | -2.912215 | 0.445231  |
| H    | -2.549171 | -0.422610 | -4.289808 |
| H    | -1.106522 | -0.745799 | -3.302300 |
| H    | -2.059272 | 0.727937  | -3.026379 |
| H    | -3.788134 | -3.163793 | -1.999829 |
| H    | -2.128647 | -3.097694 | -2.611134 |
| H    | -3.489164 | -2.698762 | -3.685274 |
| H    | -3.245922 | -0.540078 | 2.409565  |
| H    | -2.004693 | -1.814103 | 2.307245  |
| H    | -3.657478 | -2.222587 | 2.811174  |
| H    | -5.304657 | -0.673449 | 0.753815  |
| H    | -5.528607 | -2.399795 | 1.062640  |
| H    | -5.276905 | -1.835390 | -0.595310 |
| H    | 4.619432  | -1.238319 | -0.217191 |
| H    | 2.640545  | -2.172154 | 2.617737  |
| H    | 2.459962  | -2.372819 | -2.101066 |
| H    | 4.198053  | -2.270806 | -2.460241 |
| H    | 3.241227  | -0.784284 | -2.278766 |
| H    | 4.223351  | -3.287177 | 1.180937  |
| H    | 4.707868  | -3.743425 | -0.461396 |
| H    | 3.001460  | -3.855749 | 0.021685  |
| H    | 4.304961  | 0.430832  | 2.634972  |
| H    | 4.940224  | -1.175654 | 2.204048  |
| H    | 4.372374  | -0.855298 | 3.850987  |
| H    | 1.728489  | 0.733857  | 3.099623  |
| H    | 1.890346  | -0.516751 | 4.352193  |
| H    | 0.676773  | -0.695395 | 3.062554  |

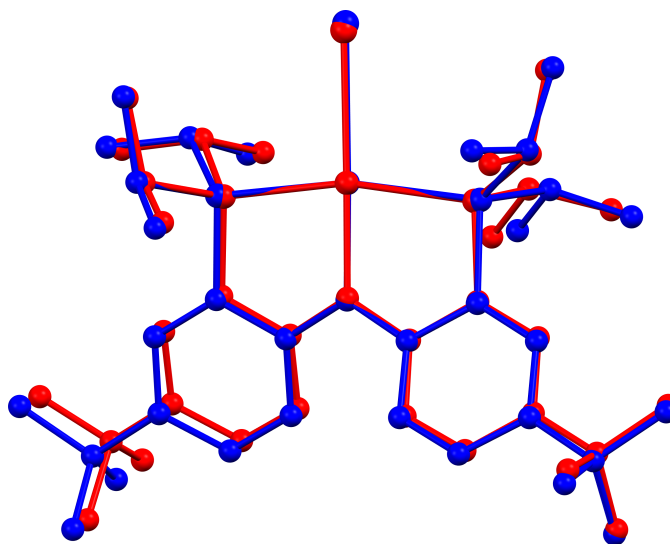**Figure S3.** Overlaid structures for  $[\{PC^*(sp^2)P\}^BuPdI]$  (**4**) (red: X-ray, blue: optimized).

**Table S2.** Selected distances (Å) and angles (°) for the optimized geometry and the crystal structure of  $[(PC^*(sp^2)P)^tBuPdI]$  (**4**).

| Distance  | Calcd. | X-Ray     | Angle             | Calcd. | X-Ray      |
|-----------|--------|-----------|-------------------|--------|------------|
| Pd – I    | 2.789  | 2.675(5)  | P(1) – Pd – P(2)  | 167.05 | 163.13(3)  |
| Pd – P(1) | 2.383  | 2.2880(7) | I – Pd – C        | 177.92 | 175.42(13) |
| Pd – P(2) | 2.394  | 2.2931(8) | P(1) – Pd – C     | 83.83  | 83.32(8)   |
| Pd – C    | 2.050  | 2.022(3)  | C(21) – C – Pd    | 118.29 | 118.8(2)   |
| C – C(11) | 1.462  | 1.441(4)  | C(11) – C – Pd    | 118.73 | 118.5(2)   |
| C – C(21) | 1.463  | 1.462(4)  | C(11) – C – C(21) | 122.97 | 122.5(2)   |

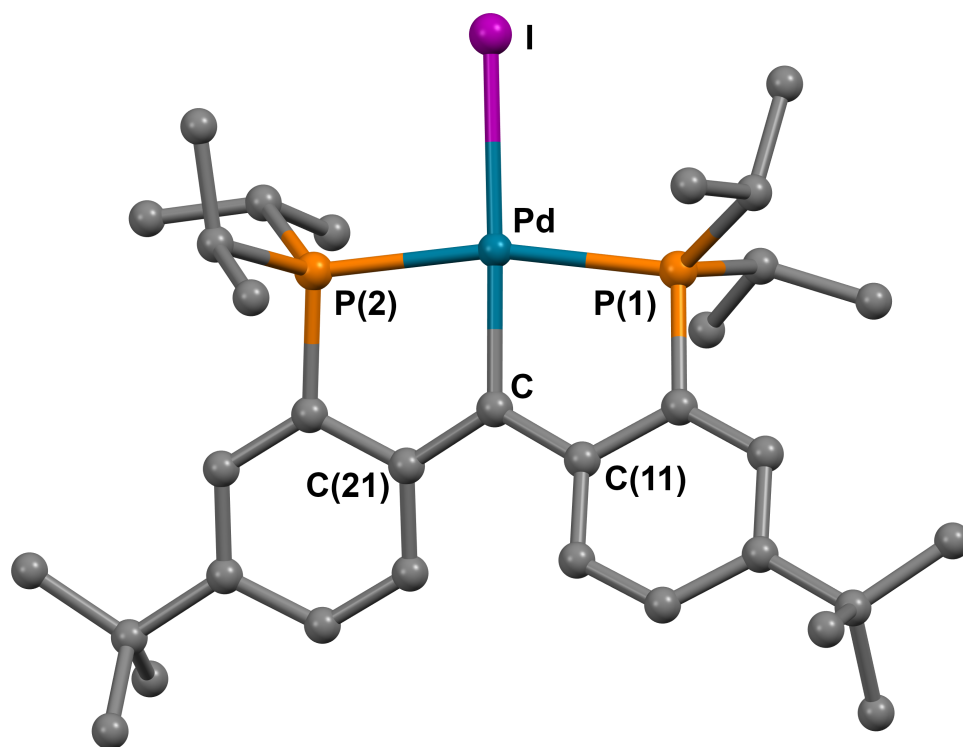

**Figure S4.** Optimized geometry for  $[(PC^*(sp^2)P)^tBuPdI]$  (**4**).

### 3.2 $[\{\text{PC}(\text{sp}^2)\text{P}\}^t\text{BuPdI}][\text{BAR}_4^{\text{F}}]$ (5)

**Table S3.** Optimized coordinates for the complex cation of  $[\{\text{PC}(\text{sp}^2)\text{P}\}^t\text{BuPdI}][\text{BAR}_4^{\text{F}}]$  (5).

| atom | x         | y         | z         |
|------|-----------|-----------|-----------|
| C    | -3.717499 | 1.540241  | 0.018668  |
| C    | -2.489342 | 0.884627  | -0.127546 |
| C    | -1.262457 | 1.555793  | 0.174401  |
| C    | -1.353234 | 2.876650  | 0.714801  |
| C    | -2.588444 | 3.500665  | 0.889437  |
| C    | -3.803677 | 2.863896  | 0.521926  |
| C    | 0.000010  | 0.845052  | -0.000739 |
| Pd   | 0.000779  | -1.163792 | -0.001310 |
| P    | -2.306889 | -0.920385 | -0.638243 |
| C    | -3.731784 | -1.821408 | 0.284174  |
| C    | -3.992609 | -3.230433 | -0.292756 |
| C    | -5.143704 | 3.601365  | 0.706946  |
| C    | -5.332090 | 3.938213  | 2.218806  |
| C    | -2.671483 | -1.038965 | -2.521108 |
| C    | -4.082473 | -0.540407 | -2.903302 |
| C    | -5.112122 | 4.924828  | -0.117451 |
| C    | -6.357217 | 2.761533  | 0.237887  |
| C    | -1.569718 | -0.312812 | -3.321726 |
| C    | -3.427325 | -1.866569 | 1.798033  |
| C    | 1.262464  | 1.555977  | -0.176018 |
| C    | 2.489292  | 0.885490  | 0.127612  |
| C    | 3.717356  | 1.541390  | -0.018218 |
| C    | 3.803537  | 2.864305  | -0.523411 |
| C    | 2.588363  | 3.500316  | -0.892462 |
| C    | 1.353185  | 2.876218  | -0.717847 |
| P    | 2.306520  | -0.918939 | 0.640049  |
| C    | 3.734547  | -1.820788 | -0.276731 |
| C    | 3.994956  | -3.228494 | 0.303481  |
| C    | 5.143508  | 3.601917  | -0.708456 |
| C    | 6.356516  | 2.764999  | -0.232928 |
| C    | 2.664445  | -1.035087 | 2.524333  |
| C    | 4.073926  | -0.535208 | 2.910685  |
| C    | 5.334952  | 3.932265  | -2.221464 |
| C    | 5.109270  | 4.928908  | 0.109925  |
| C    | 1.559897  | -0.308462 | 3.320598  |
| C    | 3.434132  | -1.868989 | -1.791334 |
| I    | 0.001790  | -3.883536 | -0.002652 |
| H    | 4.631846  | 1.021272  | 0.240567  |
| H    | 2.612689  | 4.493176  | -1.331281 |
| H    | 0.453906  | 3.381666  | -1.053191 |
| H    | 6.279494  | 4.471483  | -2.363081 |
| H    | 4.529296  | 4.565434  | -2.611273 |
| H    | 5.371701  | 3.017009  | -2.825707 |
| H    | 6.051151  | 5.472679  | -0.031679 |
| H    | 4.989338  | 4.730970  | 1.182692  |
| H    | 4.294116  | 5.589680  | -0.207396 |
| H    | 6.290100  | 2.511789  | 0.833432  |
| H    | 7.275056  | 3.346253  | -0.372951 |

Continued on next page

**Table S3.** – continued from previous page

| atom | x         | y         | x         |
|------|-----------|-----------|-----------|
| H    | 6.468606  | 1.836979  | -0.808715 |
| H    | -0.453905 | 3.382766  | 1.048964  |
| H    | -2.612717 | 4.493980  | 1.327242  |
| H    | -4.632050 | 1.019436  | -0.238447 |
| H    | 2.591058  | -2.112467 | 2.725066  |
| H    | -4.993608 | 4.722235  | -1.189497 |
| H    | -4.297188 | 5.587844  | 0.195709  |
| H    | -6.054396 | 5.468155  | 0.023208  |
| H    | -6.293197 | 2.503836  | -0.827532 |
| H    | -7.275862 | 3.342686  | 0.377702  |
| H    | -6.467099 | 1.835943  | 0.817979  |
| H    | -6.275969 | 4.478747  | 2.359884  |
| H    | -4.525283 | 4.572320  | 2.604676  |
| H    | -5.368471 | 3.025481  | 2.826904  |
| H    | 4.623639  | -1.196077 | -0.107164 |
| H    | 1.579250  | 0.774071  | 3.136766  |
| H    | 1.720374  | -0.466634 | 4.394534  |
| H    | 0.562652  | -0.687148 | 3.068052  |
| H    | 4.176539  | 0.543330  | 2.739094  |
| H    | 4.872962  | -1.054718 | 2.368648  |
| H    | 4.236188  | -0.713407 | 3.981536  |
| H    | 4.287705  | -2.316618 | -2.316109 |
| H    | 3.266479  | -0.870803 | -2.215404 |
| H    | 2.552063  | -2.487509 | -1.992684 |
| H    | 4.269304  | -3.204017 | 1.364683  |
| H    | 4.830562  | -3.686223 | -0.241685 |
| H    | 3.120386  | -3.876252 | 0.185977  |
| H    | -2.598305 | -2.116541 | -2.720850 |
| H    | -4.621870 | -1.197796 | 0.115619  |
| H    | -0.571659 | -0.691399 | -3.072240 |
| H    | -1.588376 | 0.769824  | -3.138490 |
| H    | -1.733841 | -0.471662 | -4.395010 |
| H    | -4.184788 | 0.538521  | -2.734115 |
| H    | -4.879200 | -1.058802 | -2.356826 |
| H    | -4.248766 | -0.721417 | -3.973054 |
| H    | -3.259867 | -0.867441 | 2.219965  |
| H    | -2.543886 | -2.483551 | 1.998191  |
| H    | -4.278895 | -2.314400 | 2.325861  |
| H    | -3.116953 | -3.877059 | -0.177125 |
| H    | -4.270669 | -3.208017 | -1.353049 |
| H    | -4.825853 | -3.688093 | 0.256063  |

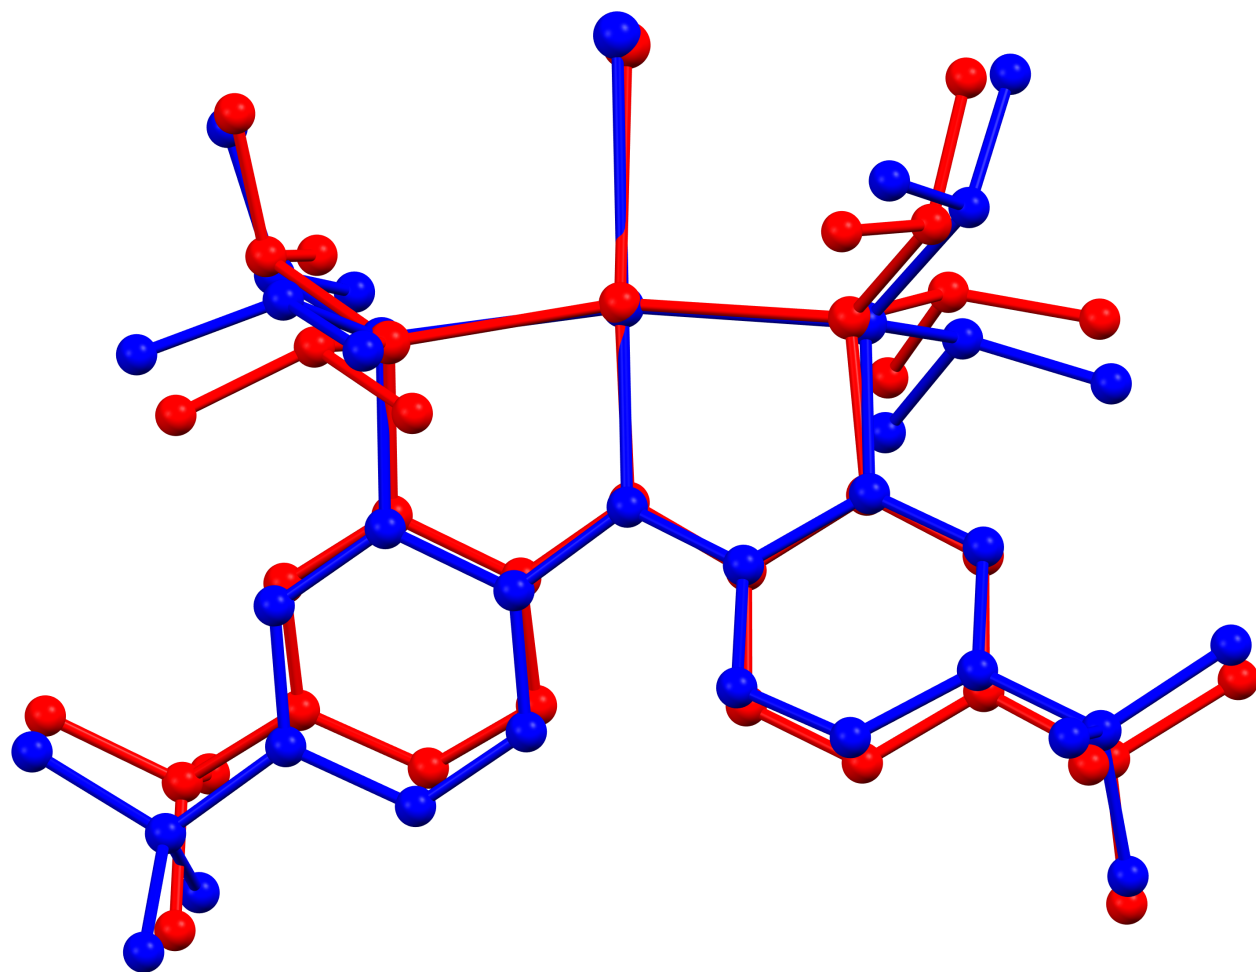

**Figure S5.** Overlaid structures for the complex cation of  $[\{\text{PC}(\text{sp}^2)\text{P}\}^{\text{iBu}}\text{PdI}][\text{BAr}_4^{\text{F}}]$  (**5**) (red: X-ray, blue: optimized).

**Table S4.** Selected distances (Å) and angles (°) for the optimized geometry and the crystal structure of the complex cation of  $[\{PC(sp^2)P\}^tBuPdI][BAR_4^F]$  (**5**).

| Distance  | Calcd. | X-Ray     | Angle             | Calcd. | X-Ray      |
|-----------|--------|-----------|-------------------|--------|------------|
| Pd – I    | 2.720  | 2.6255(3) | P(1) – Pd – P(2)  | 168.35 | 164.98(3)  |
| Pd – P(1) | 2.406  | 2.3161(7) | I – Pd – C        | 179.99 | 168.44(7)  |
| Pd – P(2) | 2.406  | 2.2884(7) | P(1) – Pd – C     | 84.18  | 83.03(8)   |
| Pd – C    | 2.009  | 1.968(3)  | C(21) – C – Pd    | 119.13 | 121.2(2)   |
| C – C(11) | 1.459  | 1.442(4)  | C(11) – C – Pd    | 119.17 | 117.59(19) |
| C – C(21) | 1.459  | 1.440(4)  | C(11) – C – C(21) | 121.70 | 120.9(2)   |

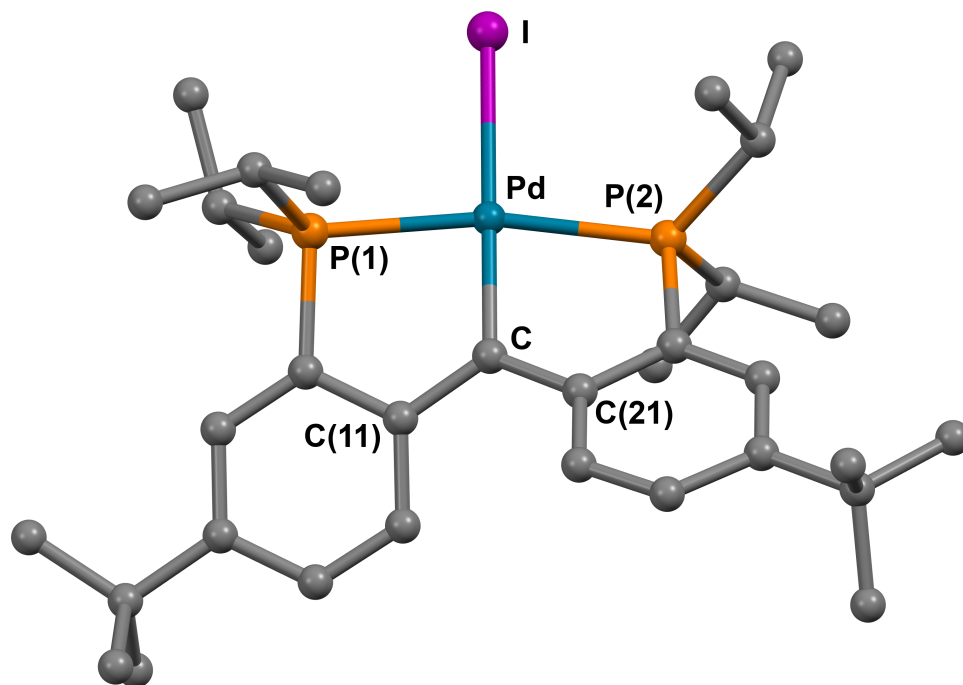

**Figure S6.** Optimized geometry for  $[\{PC(sp^2)P\}^tBuPdI][BAR_4^F]$  (**5**).

### 3.3 $[\{\text{PC}(\text{sp}^2)\text{P}\}^{\text{Me}}\text{PdI}]^+$ (**5'**)

**Table S5.** Optimized coordinates for  $[\{\text{PC}(\text{sp}^2)\text{P}\}^{\text{Me}}\text{PdI}]^+$  (**5'**).

| atom | x         | y         | z         |
|------|-----------|-----------|-----------|
| C    | -0.021726 | -0.062306 | -0.072618 |
| C    | -0.006247 | -0.068469 | 1.325822  |
| C    | 1.235829  | -0.059574 | 2.045266  |
| C    | 2.445829  | 0.046025  | 1.292332  |
| C    | 2.418601  | 0.084314  | -0.108609 |
| C    | 1.190679  | 0.006589  | -0.795208 |
| C    | 1.201547  | -0.067629 | 3.509989  |
| Pd   | -0.464898 | 0.548975  | 4.443722  |
| P    | -1.550644 | 0.002085  | 2.397363  |
| C    | -2.704000 | 1.233275  | 1.580711  |
| H    | -3.561853 | 1.388231  | 2.241365  |
| C    | -2.412649 | -1.661146 | 2.260078  |
| H    | -2.718657 | -1.853842 | 1.226331  |
| H    | -1.738443 | -2.452677 | 2.597599  |
| H    | -2.186734 | 2.187818  | 1.451987  |
| C    | 2.341653  | -0.510340 | 4.316763  |
| C    | 2.431735  | -0.075107 | 5.681650  |
| C    | 3.502717  | -0.472038 | 6.488720  |
| C    | 4.484471  | -1.353053 | 5.981986  |
| C    | 4.379313  | -1.846242 | 4.666330  |
| C    | 3.327227  | -1.428552 | 3.839588  |
| P    | 0.983731  | 0.961970  | 6.286712  |
| C    | 0.550222  | 0.318876  | 7.993001  |
| H    | -0.363011 | 0.820654  | 8.325579  |
| C    | 1.612099  | 2.711807  | 6.554108  |
| H    | 2.392538  | 2.729197  | 7.322238  |
| H    | 2.011024  | 3.105673  | 5.615638  |
| H    | 0.357243  | -0.755920 | 7.939608  |
| I    | -2.703953 | 1.376844  | 5.698260  |
| H    | 3.579837  | -0.128528 | 7.516932  |
| H    | 5.108482  | -2.560359 | 4.295070  |
| H    | 3.232638  | -1.854867 | 2.846796  |
| H    | 3.394276  | 0.156351  | 1.806738  |
| H    | 3.345628  | 0.185426  | -0.665280 |
| H    | -0.961902 | -0.086435 | -0.617276 |
| H    | 0.772142  | 3.337110  | 6.871575  |
| H    | 1.358084  | 0.516985  | 8.705504  |
| H    | -3.295253 | -1.648618 | 2.906743  |
| H    | -3.050625 | 0.863937  | 0.609634  |
| H    | 5.306450  | -1.670261 | 6.617906  |
| H    | 1.172477  | 0.026224  | -1.881462 |

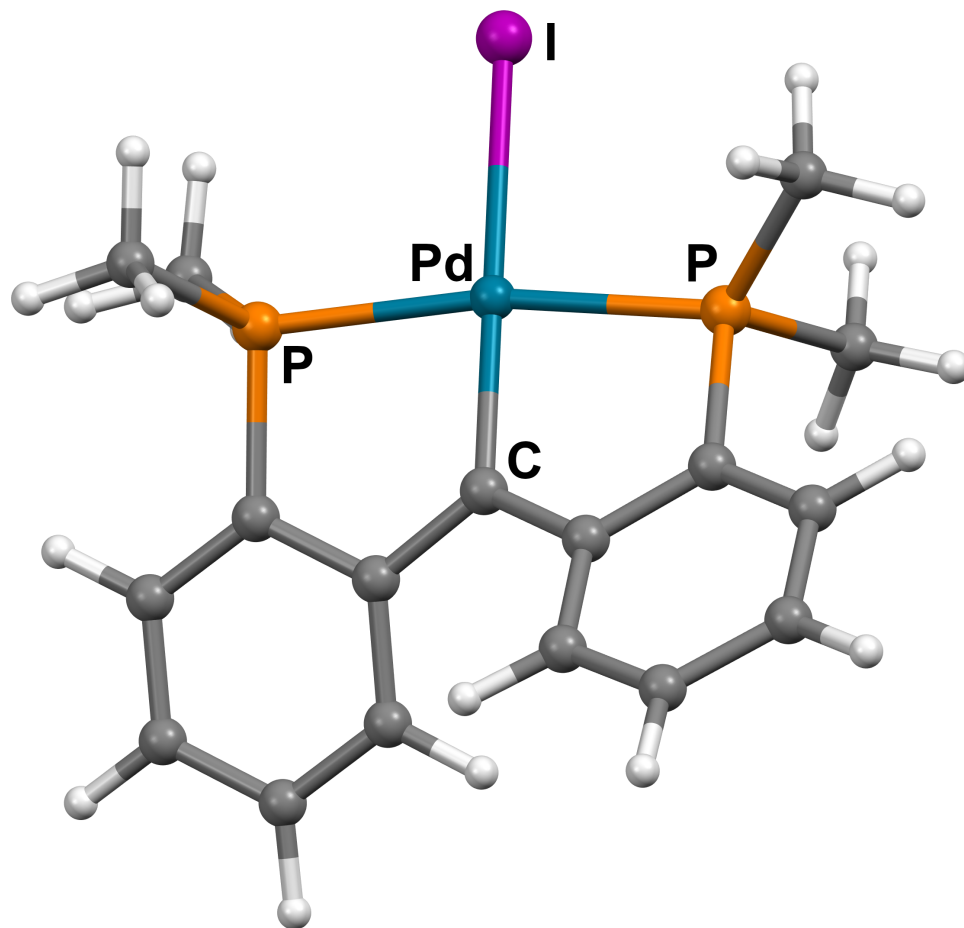

**Figure S7.** Optimized geometry for  $[\{PC(sp^2)P\}^MePdI]^+$  (**5'**).



## 4 NMR Spectra

### 4.1 NMR Spectra for $[\{\text{PC}(\text{sp}^2)\text{P}\}^t\text{BuPdI}][\text{BAR}_4^{\text{F}}]$ (5)

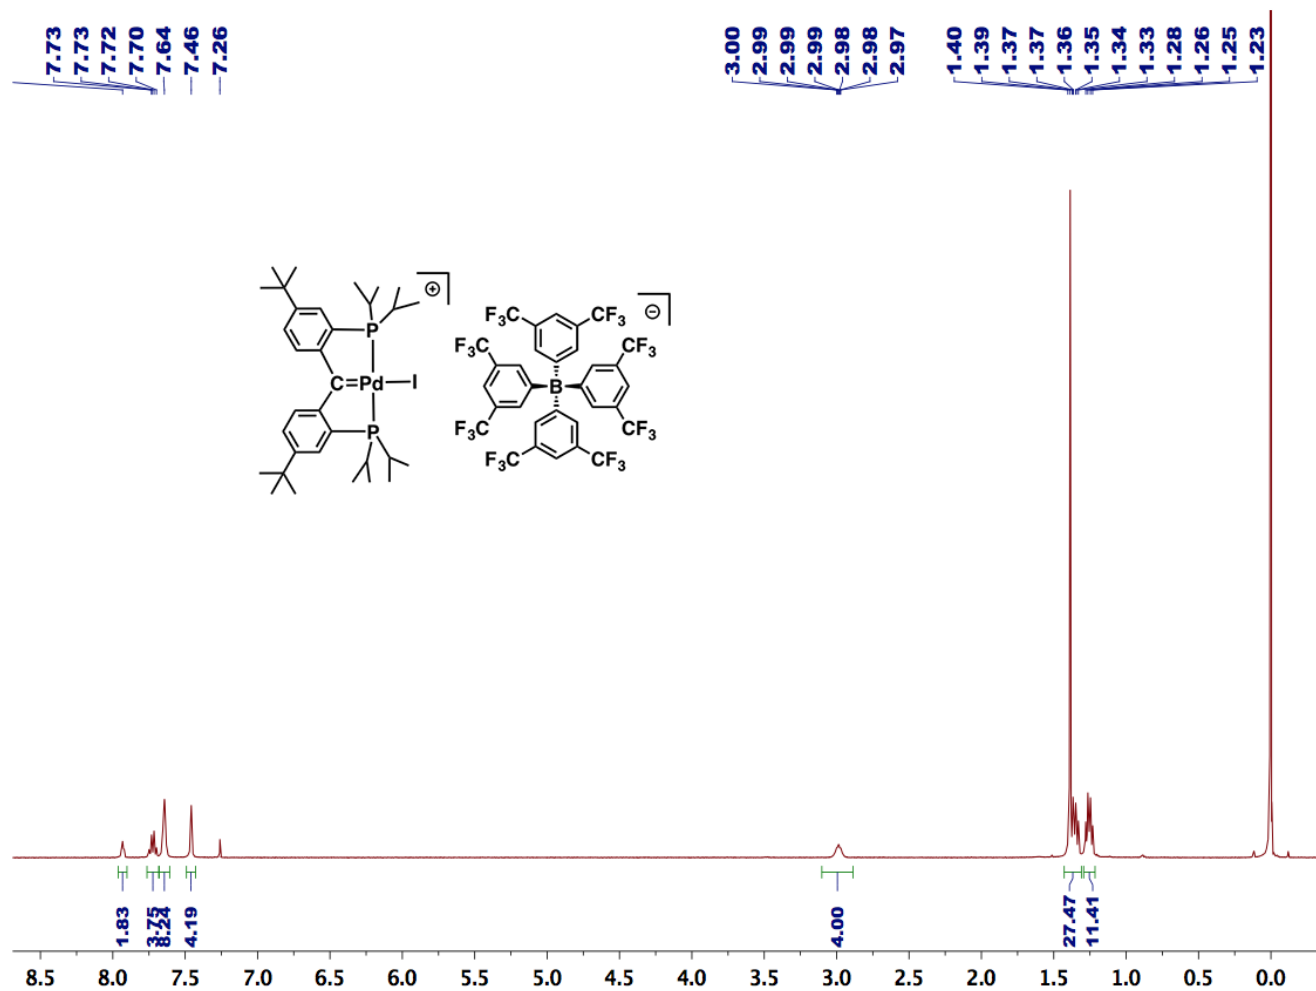

Figure S8.  $^1\text{H}$  NMR spectrum for  $[\{\text{PC}(\text{sp}^2)\text{P}\}^t\text{BuPdI}][\text{BAR}_4^{\text{F}}]$  (5).

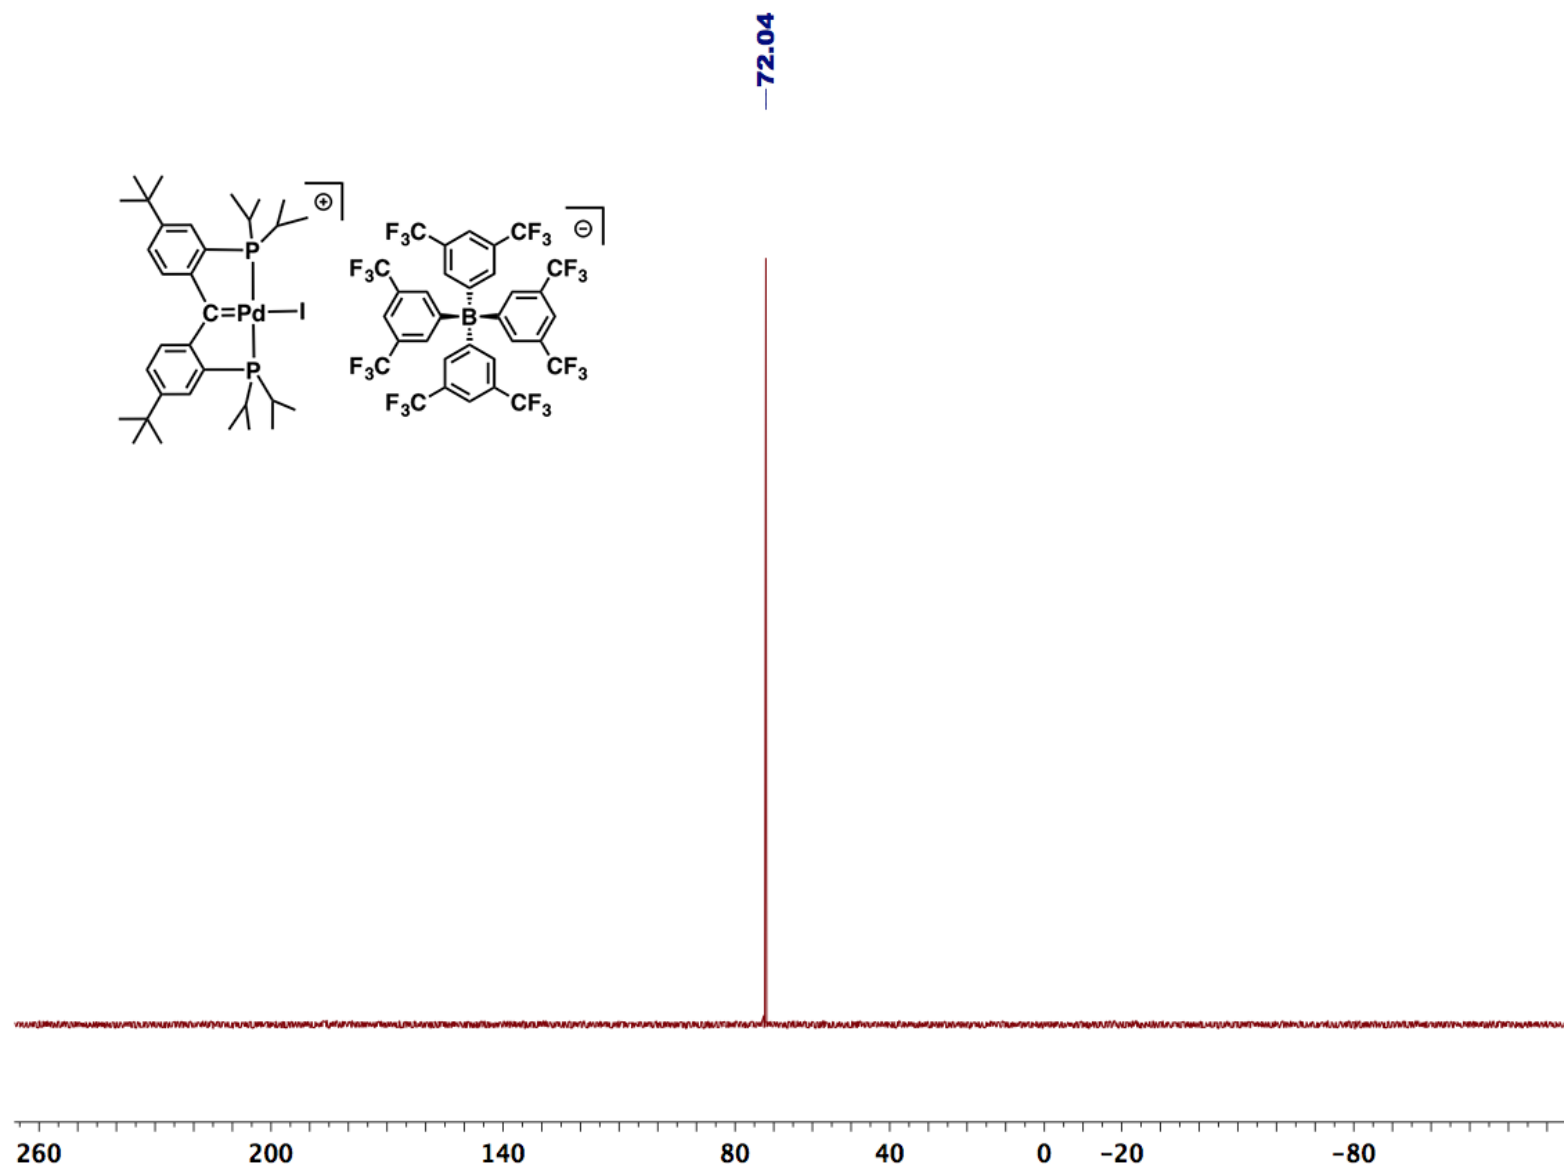

Figure S9.  $^{31}\text{P}\{^1\text{H}\}$  NMR spectrum for  $[\{\text{PC}(\text{sp}^2)\text{P}\}^t\text{BuPdI}][\text{BAr}_4^{\text{F}}]$  (5).

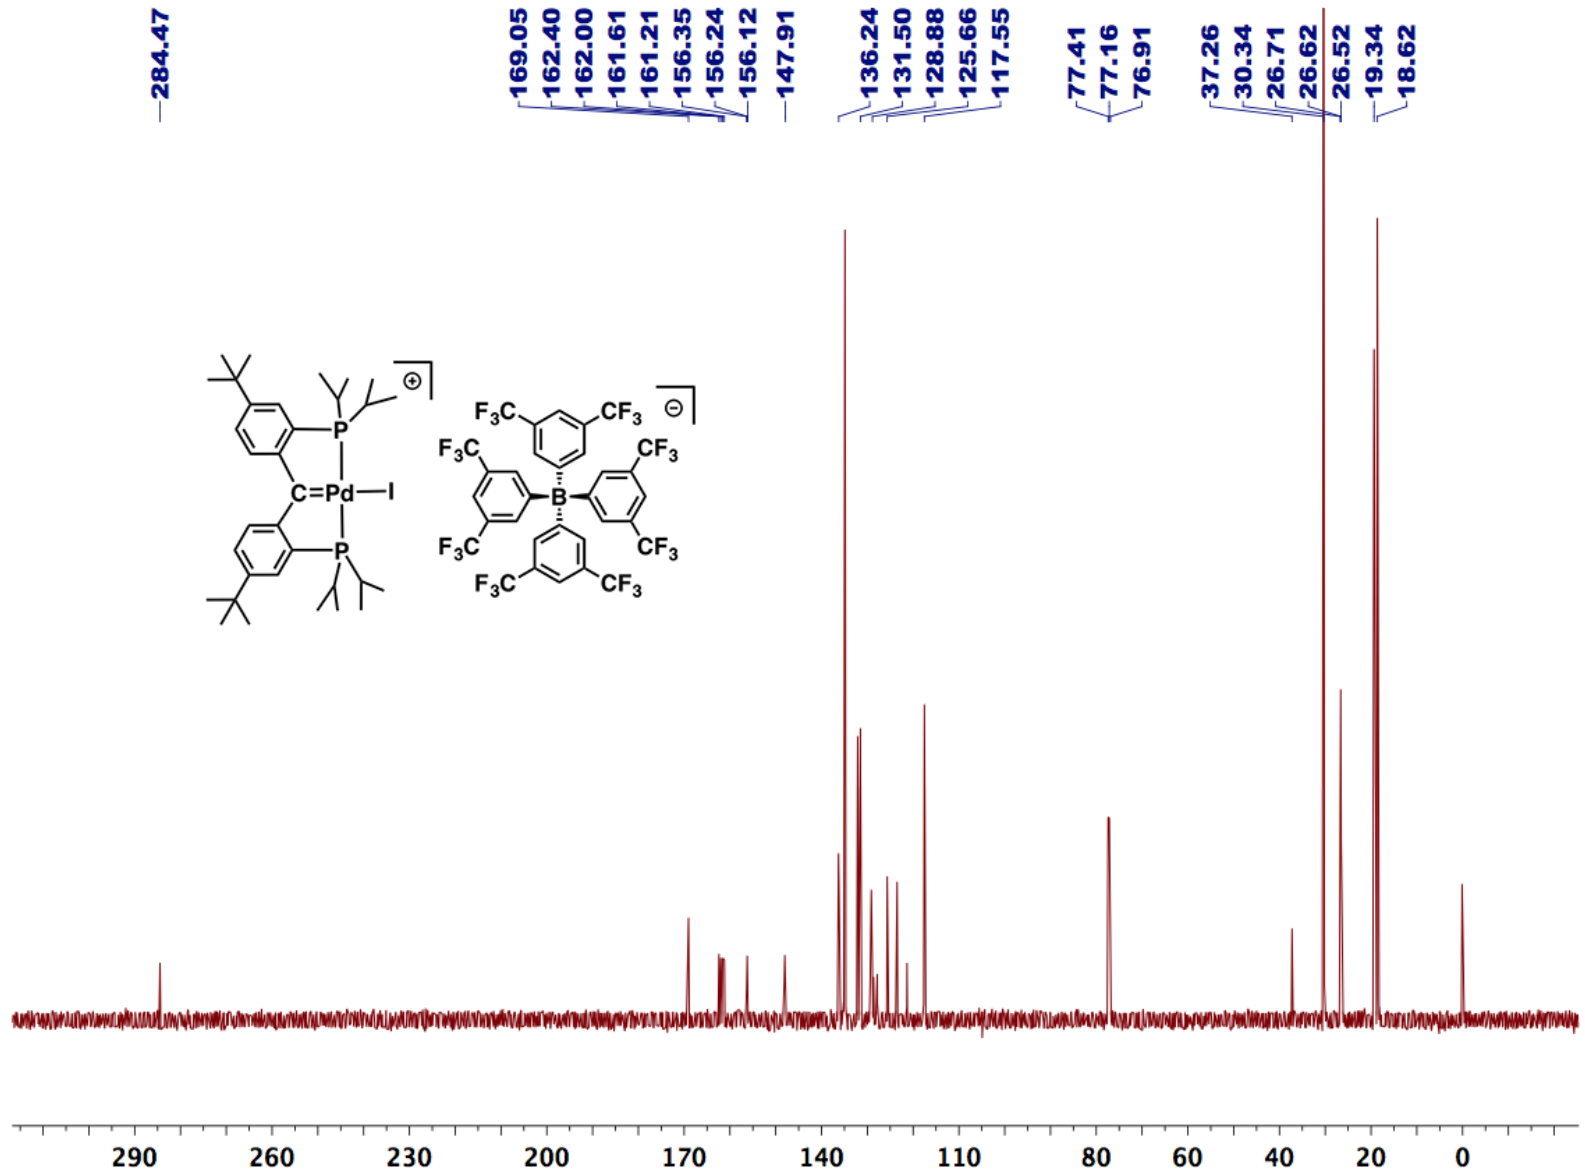

Figure S10.  $^{13}\text{C}\{^1\text{H}\}$  NMR spectrum for  $[\{\text{PC}(\text{sp}^2)\text{P}\}^t\text{BuPdI}][\text{BAr}_4^{\text{F}}]$  (5).

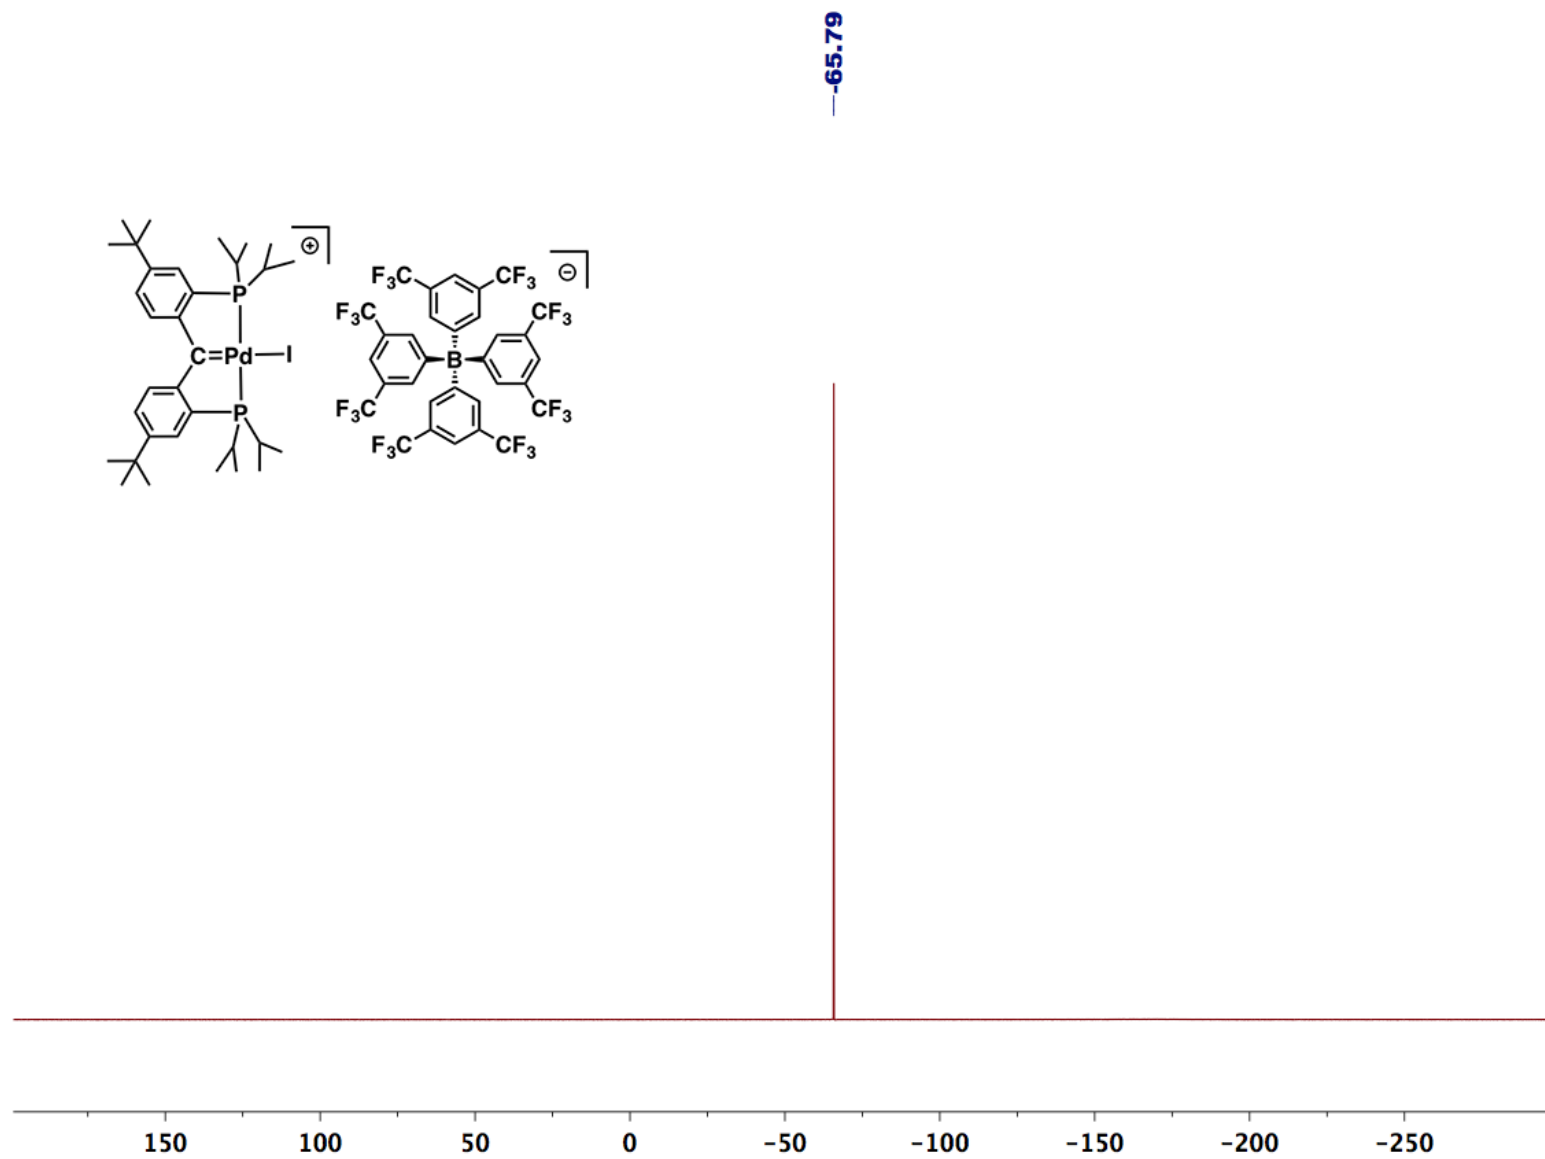

**Figure S11.**  $^{19}\text{F}$  NMR spectrum for  $[\{\text{PC}(\text{sp}^2)\text{P}\}^{\text{tBu}}\text{PdI}][\text{BAr}_4^{\text{F}}]$  (5).

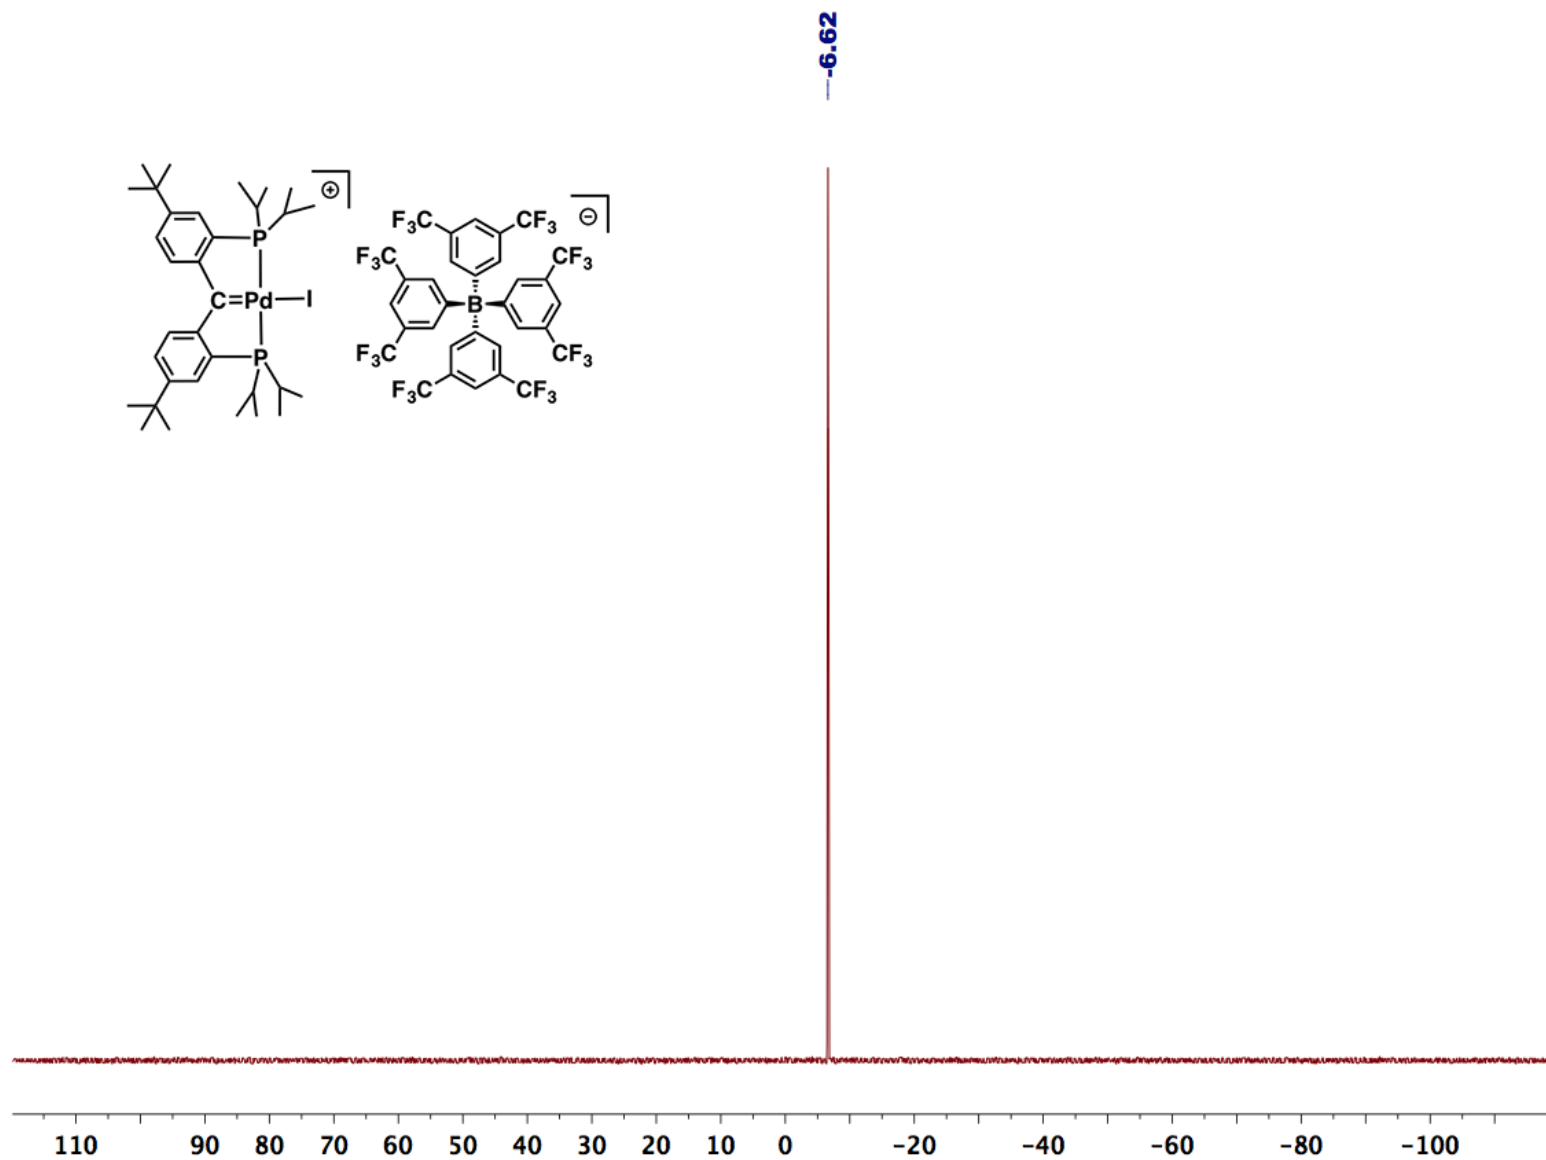

Figure S12.  $^{11}\text{B}$  NMR spectrum for  $[\{\text{PC}(\text{sp}^2)\text{P}\}^t\text{BuPdI}][\text{BAR}_4^{\text{F}}]$  (5).

## 4.2 NMR Spectra for $[\{\text{PC}(\text{sp}^3)\text{HP}\}^t\text{BuPdI}]$ (6)

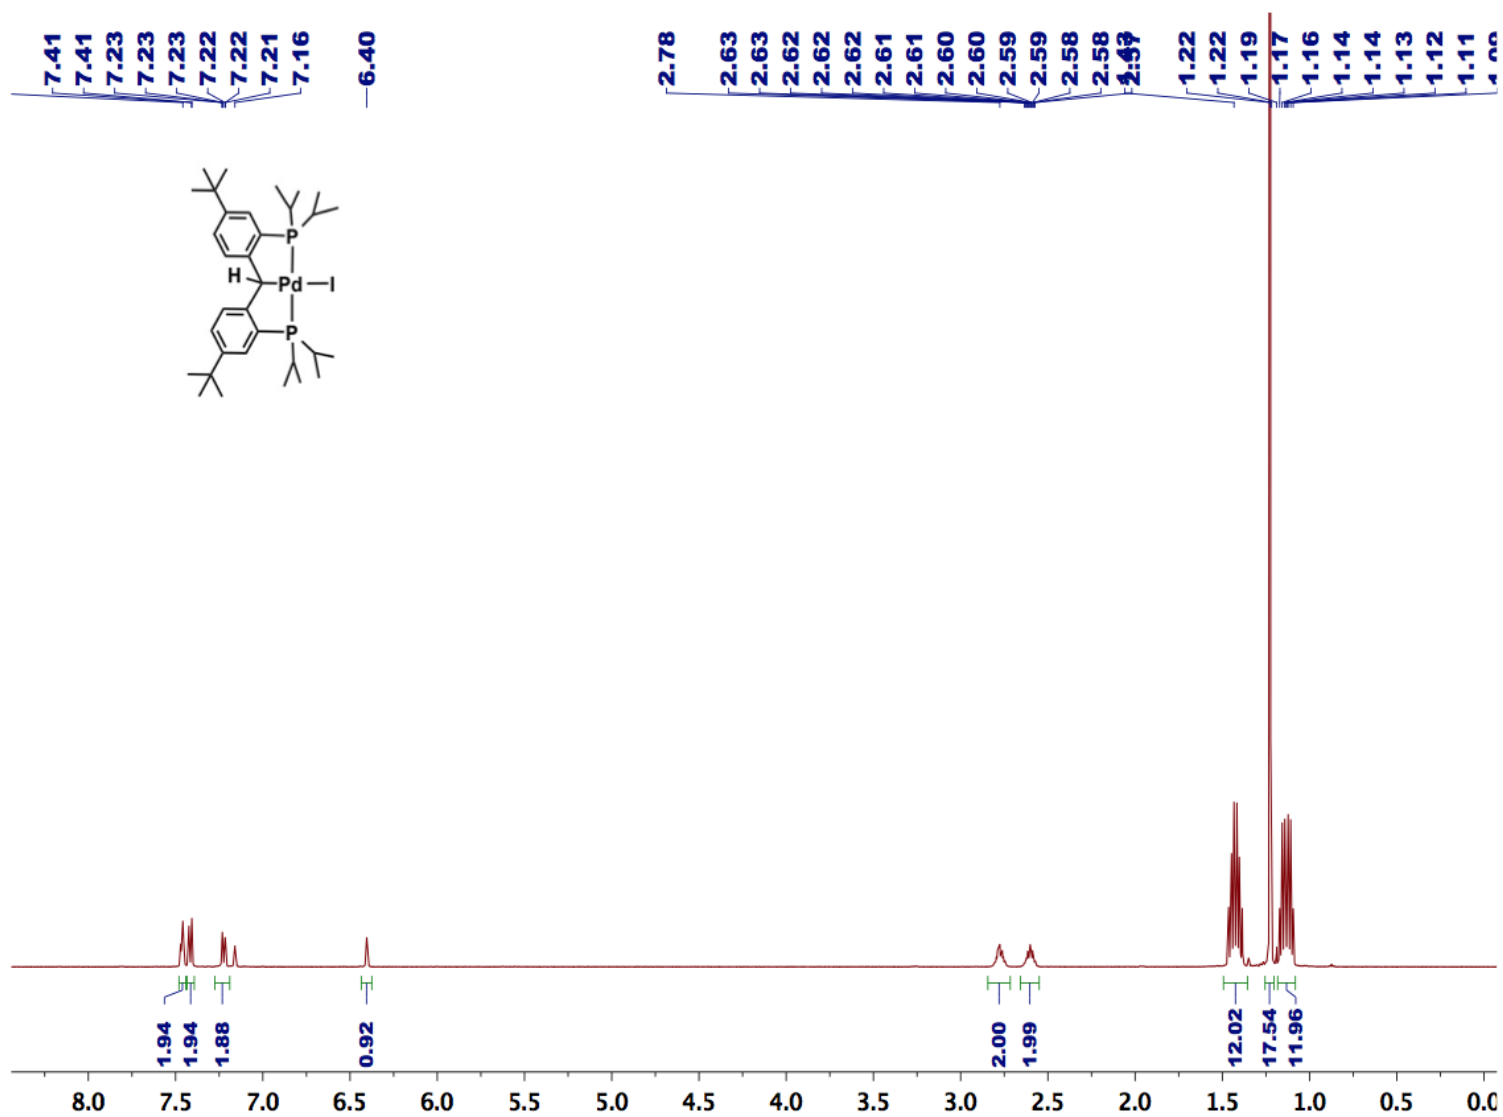

Figure S13.  $^1\text{H}$  NMR spectrum for  $[\{\text{PC}(\text{sp}^3)\text{HP}\}^t\text{BuPdI}]$  (6).

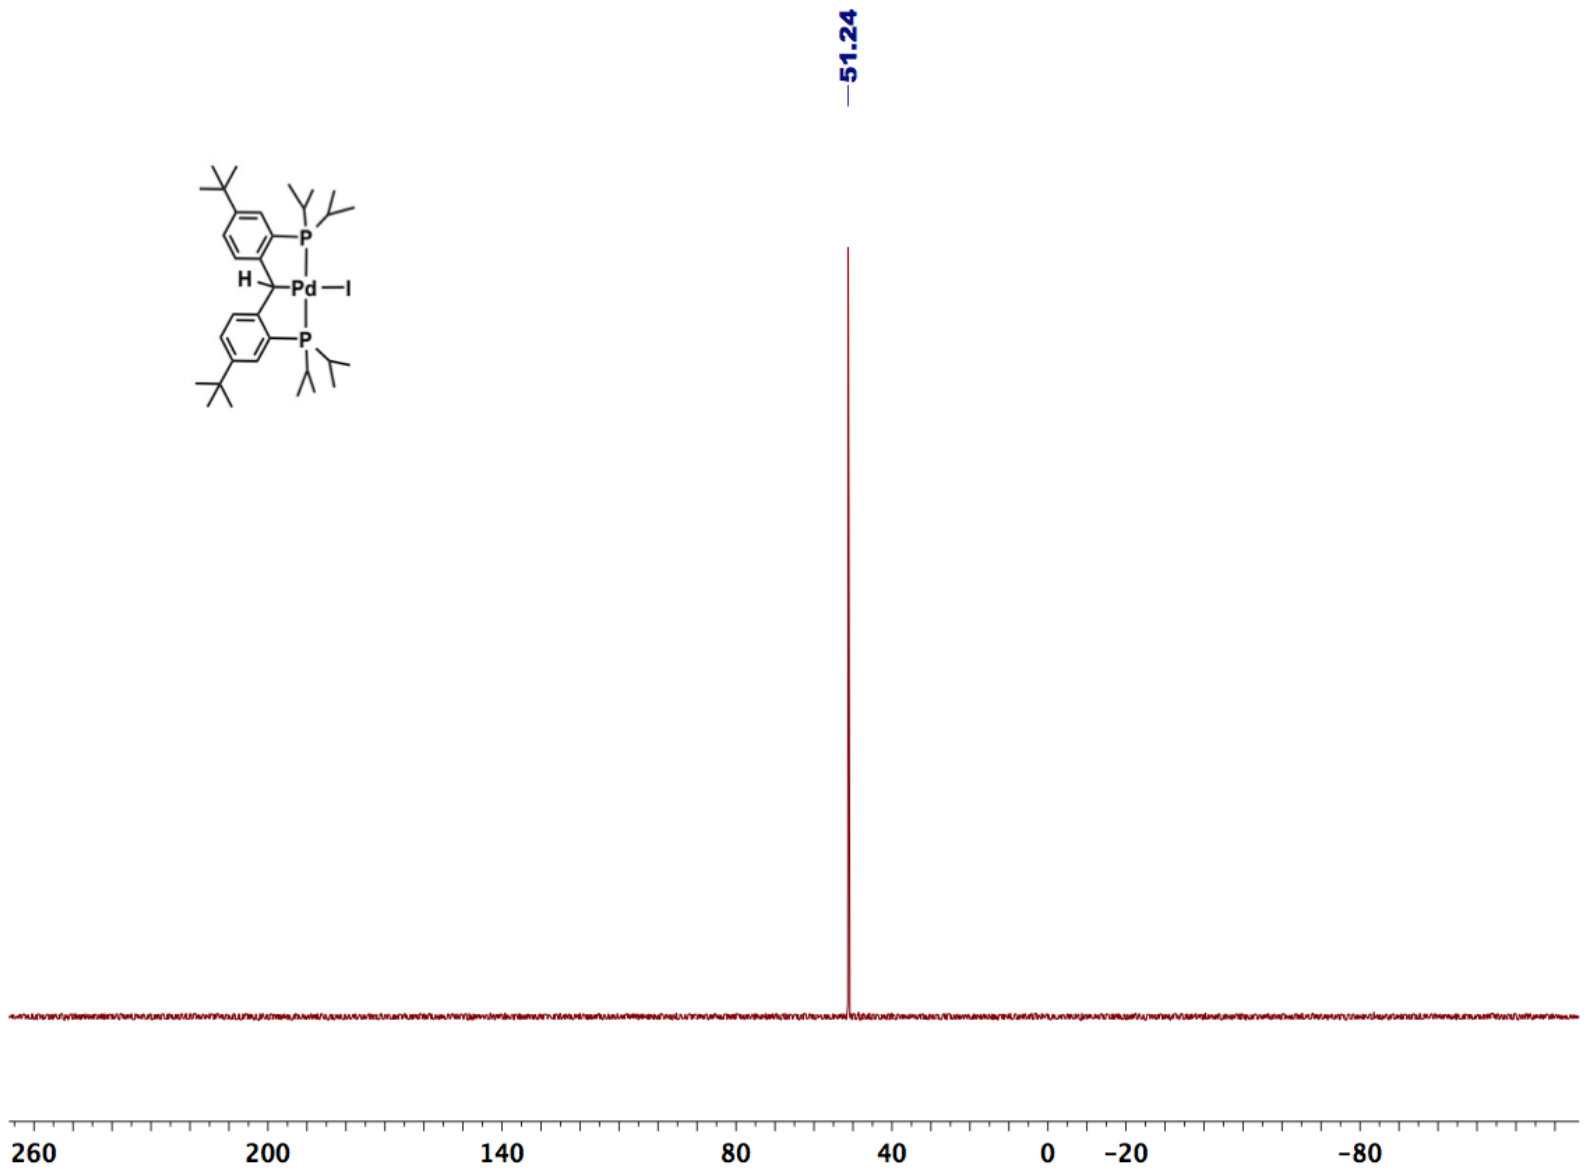

Figure S14.  $^{31}\text{P}\{^1\text{H}\}$  NMR spectrum for  $[\{\text{PC}(\text{sp}^3)\text{HP}\}^t\text{BuPdI}]$  (**6**).





### 4.3 NMR Spectra for $[\{\text{PC}(\text{sp}^3)(\text{SPh})\text{P}\}^t\text{BuPdI}]$ (7)

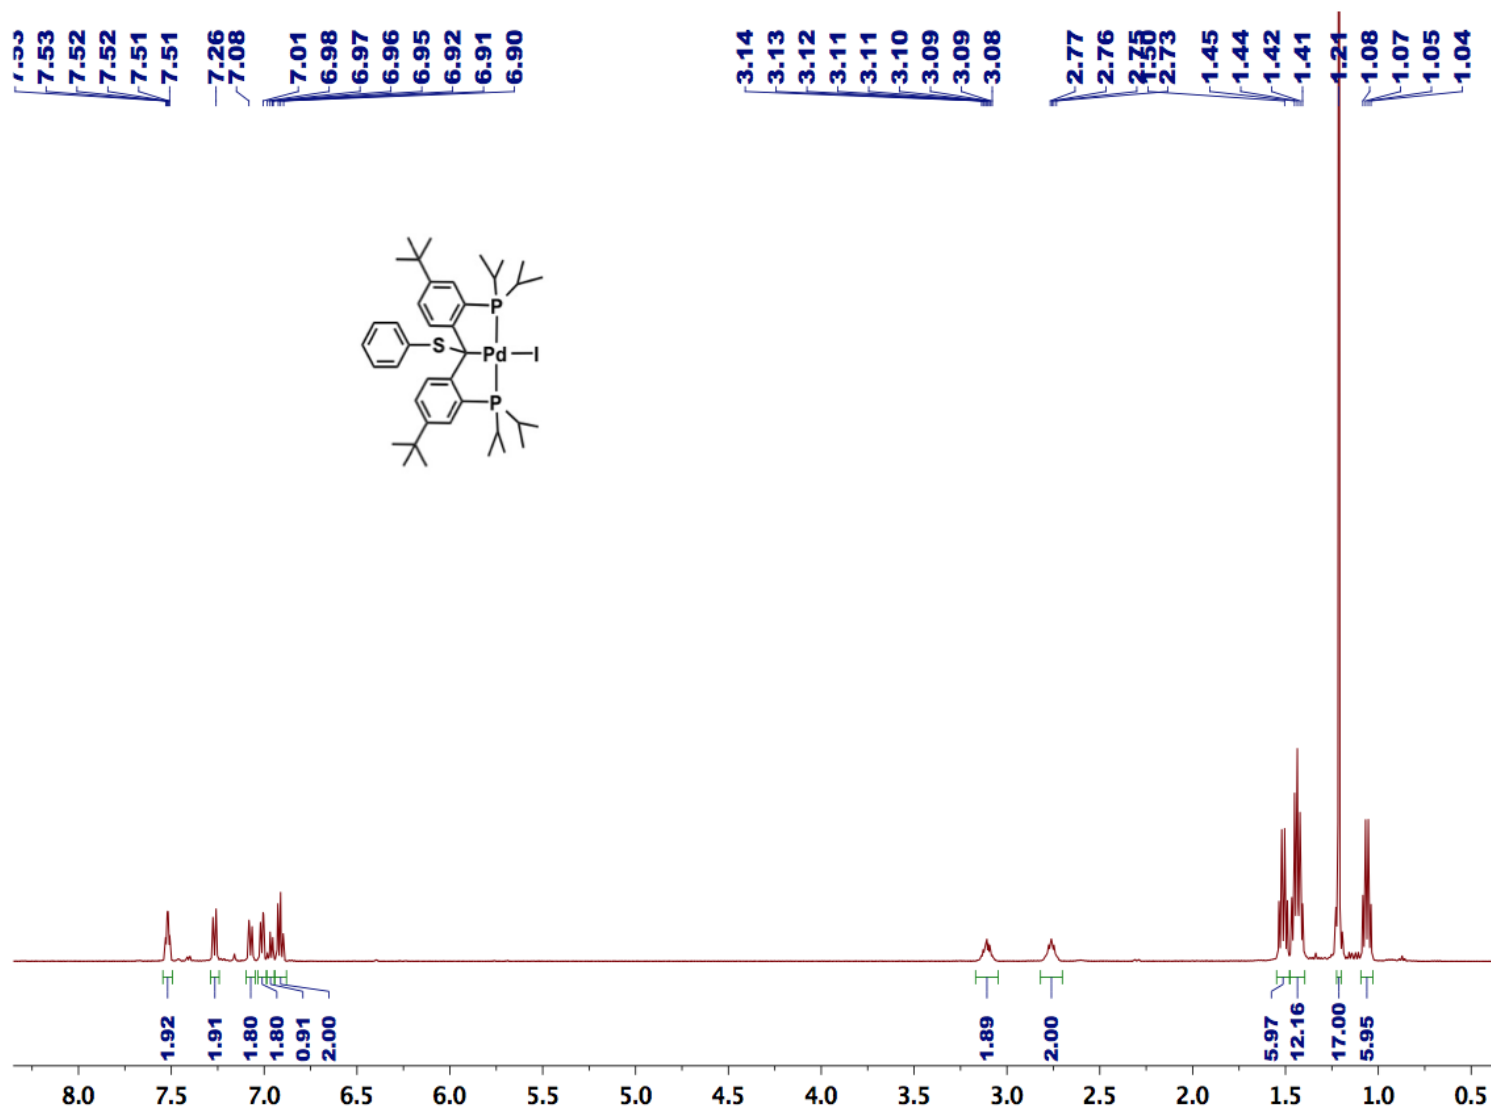

Figure S16.  $^1\text{H}$  NMR spectrum for  $[\{\text{PC}(\text{sp}^3)(\text{SPh})\text{P}\}^t\text{BuPdI}]$  (7).

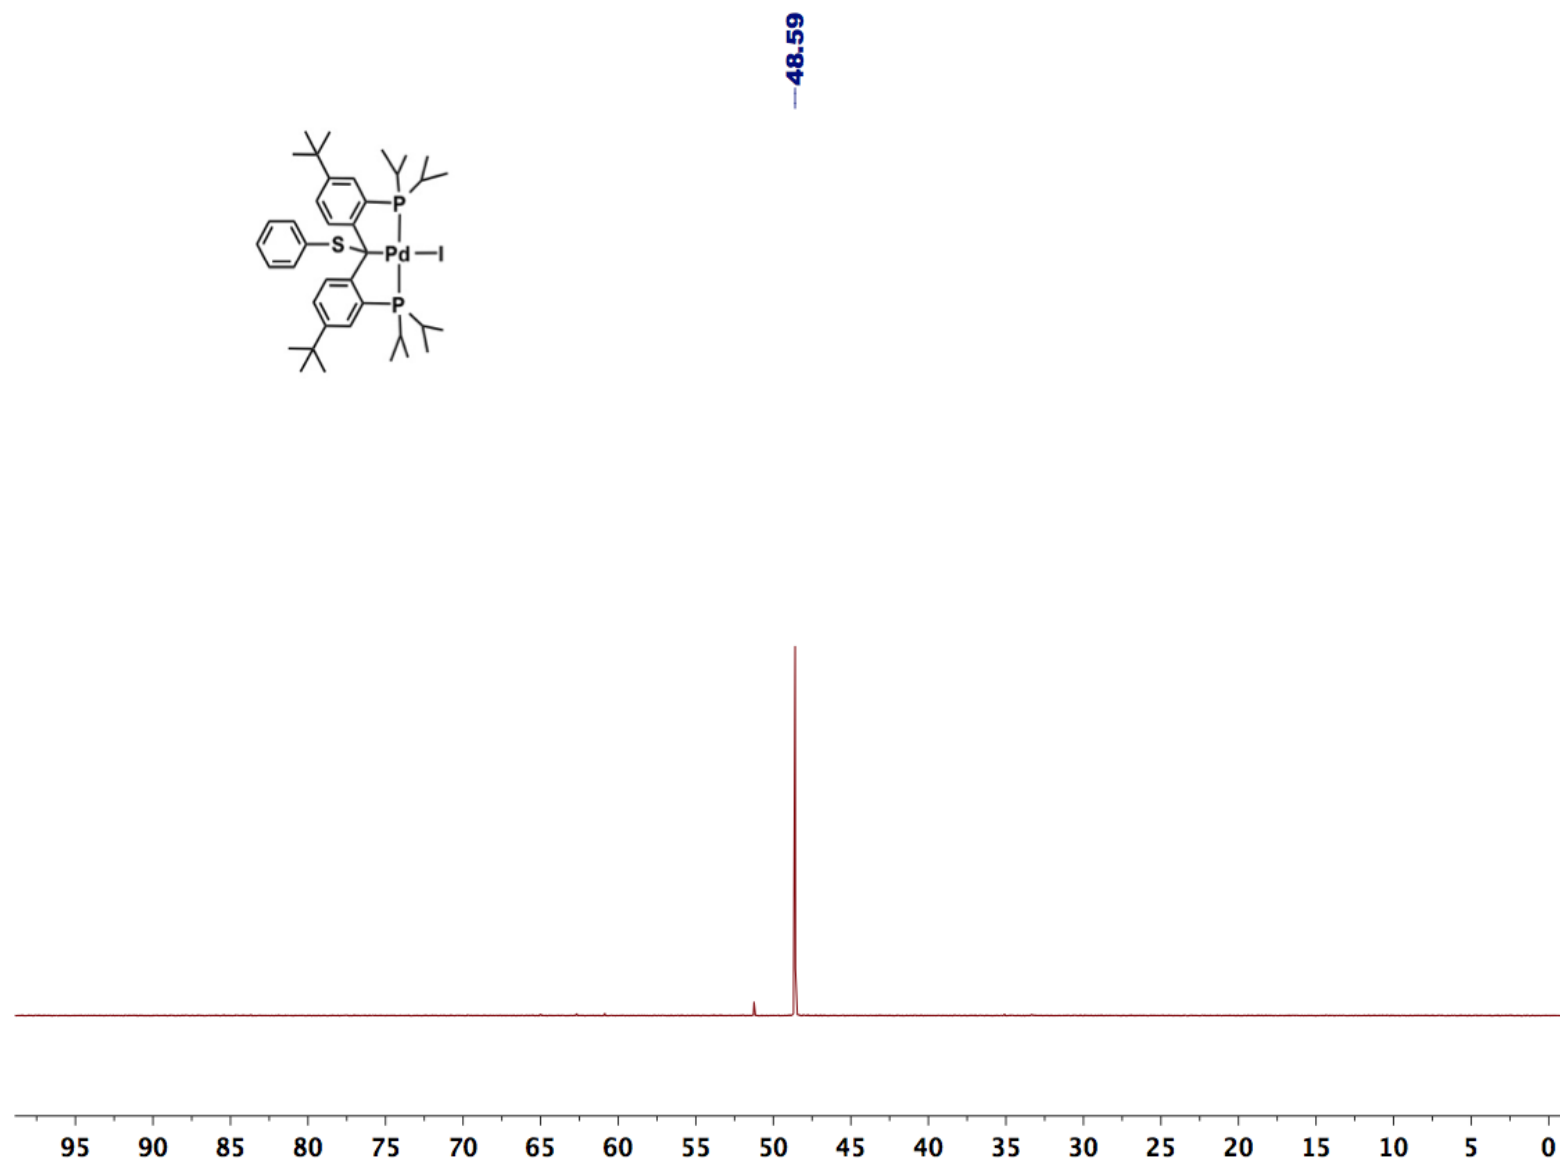

Figure S17.  $^{31}\text{P}\{^1\text{H}\}$  NMR spectrum for  $[\{\text{PC}(\text{sp}^3)(\text{SPh})\text{P}^t\text{Bu}\text{PdI}\}]$  (7).

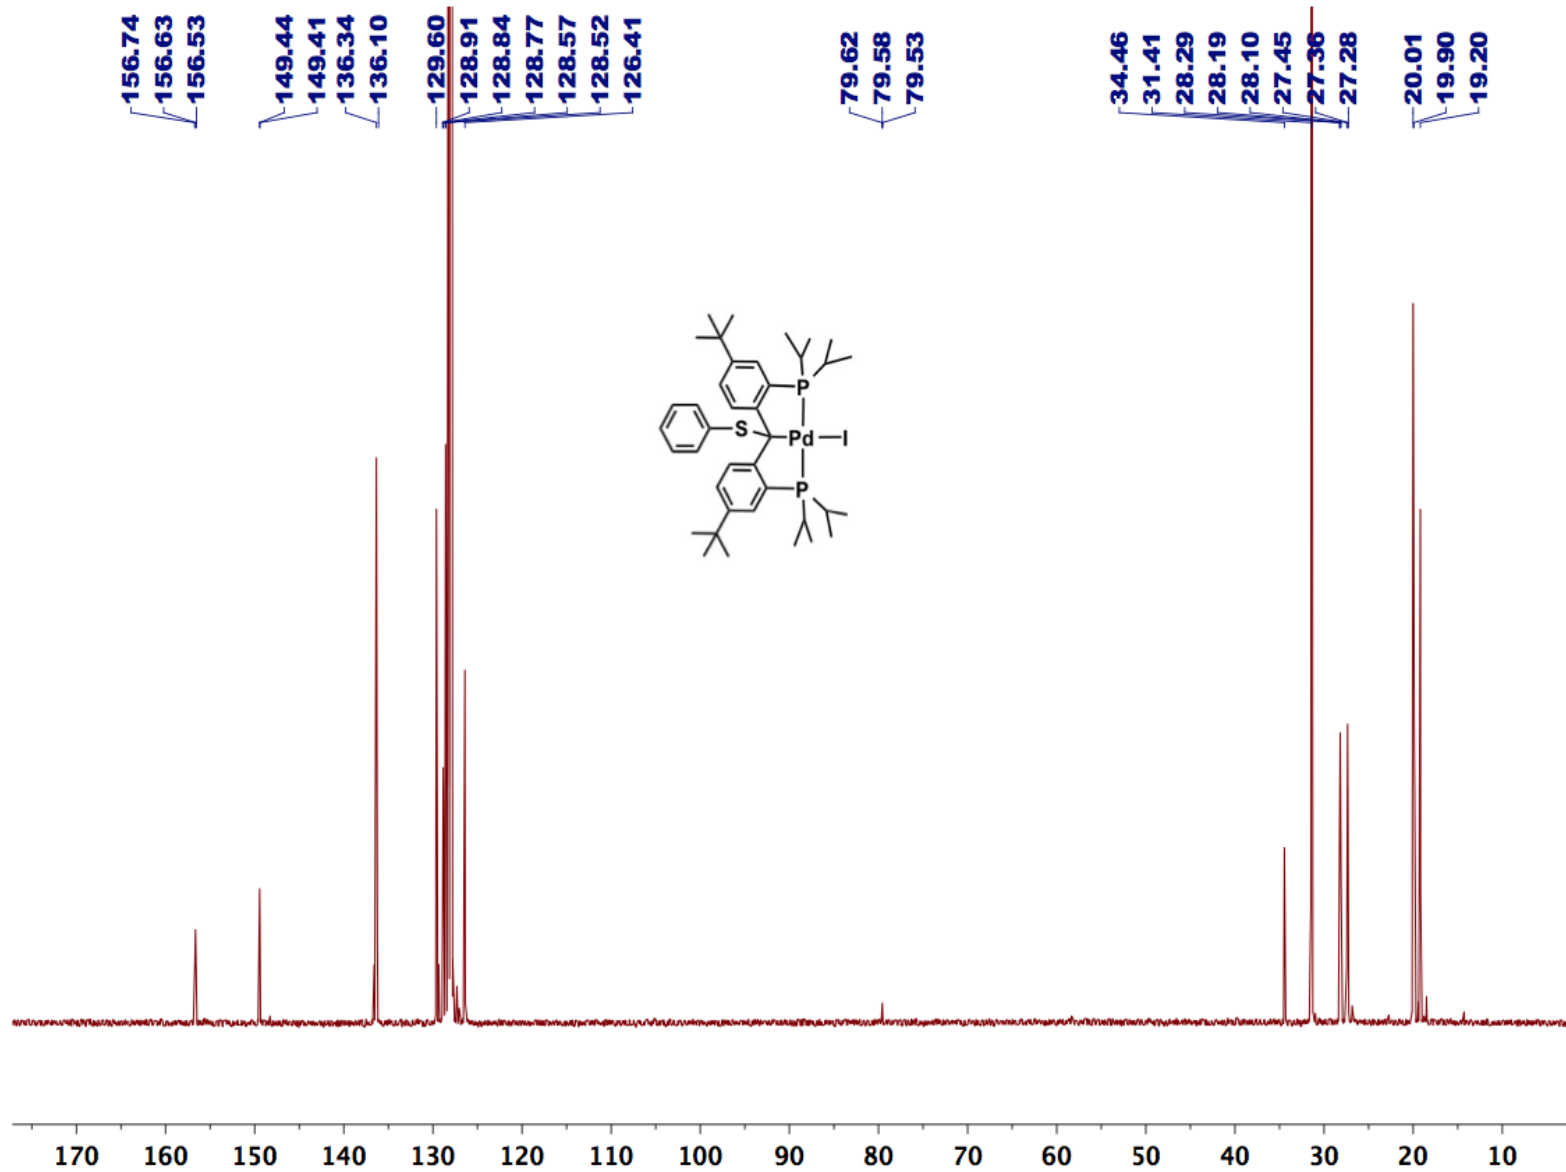

Figure S18.  $^{13}\text{C}\{^1\text{H}\}$  NMR spectrum for  $[\{\text{PC}(\text{sp}^3)(\text{SPh})\text{P}^i\text{Bu}\}\text{PdI}]$  (7).

#### 4.4 NMR Spectra for $[\{\text{PC}(\text{sp}^3)(\text{SPh})\text{P}\}^t\text{BuPdOTf}]$ (**8**)

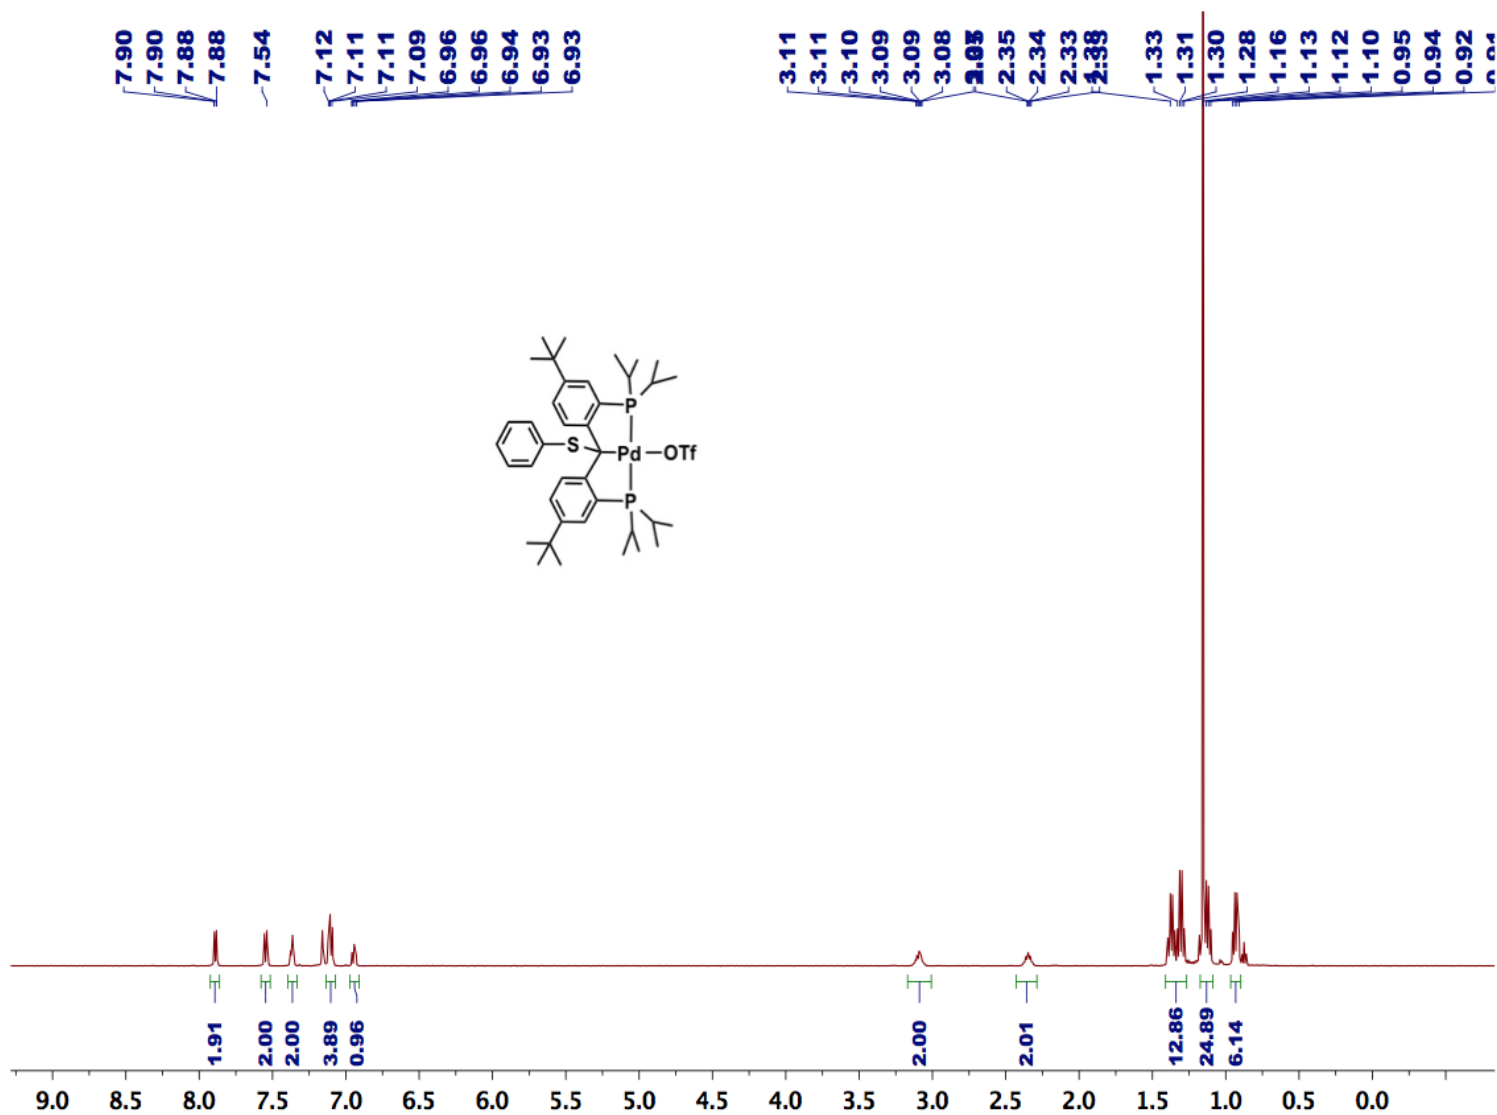

Figure S19.  $^1\text{H}$  NMR spectrum for  $[\{\text{PC}(\text{sp}^3)(\text{SPh})\text{P}\}^t\text{BuPdOTf}]$  (**8**).

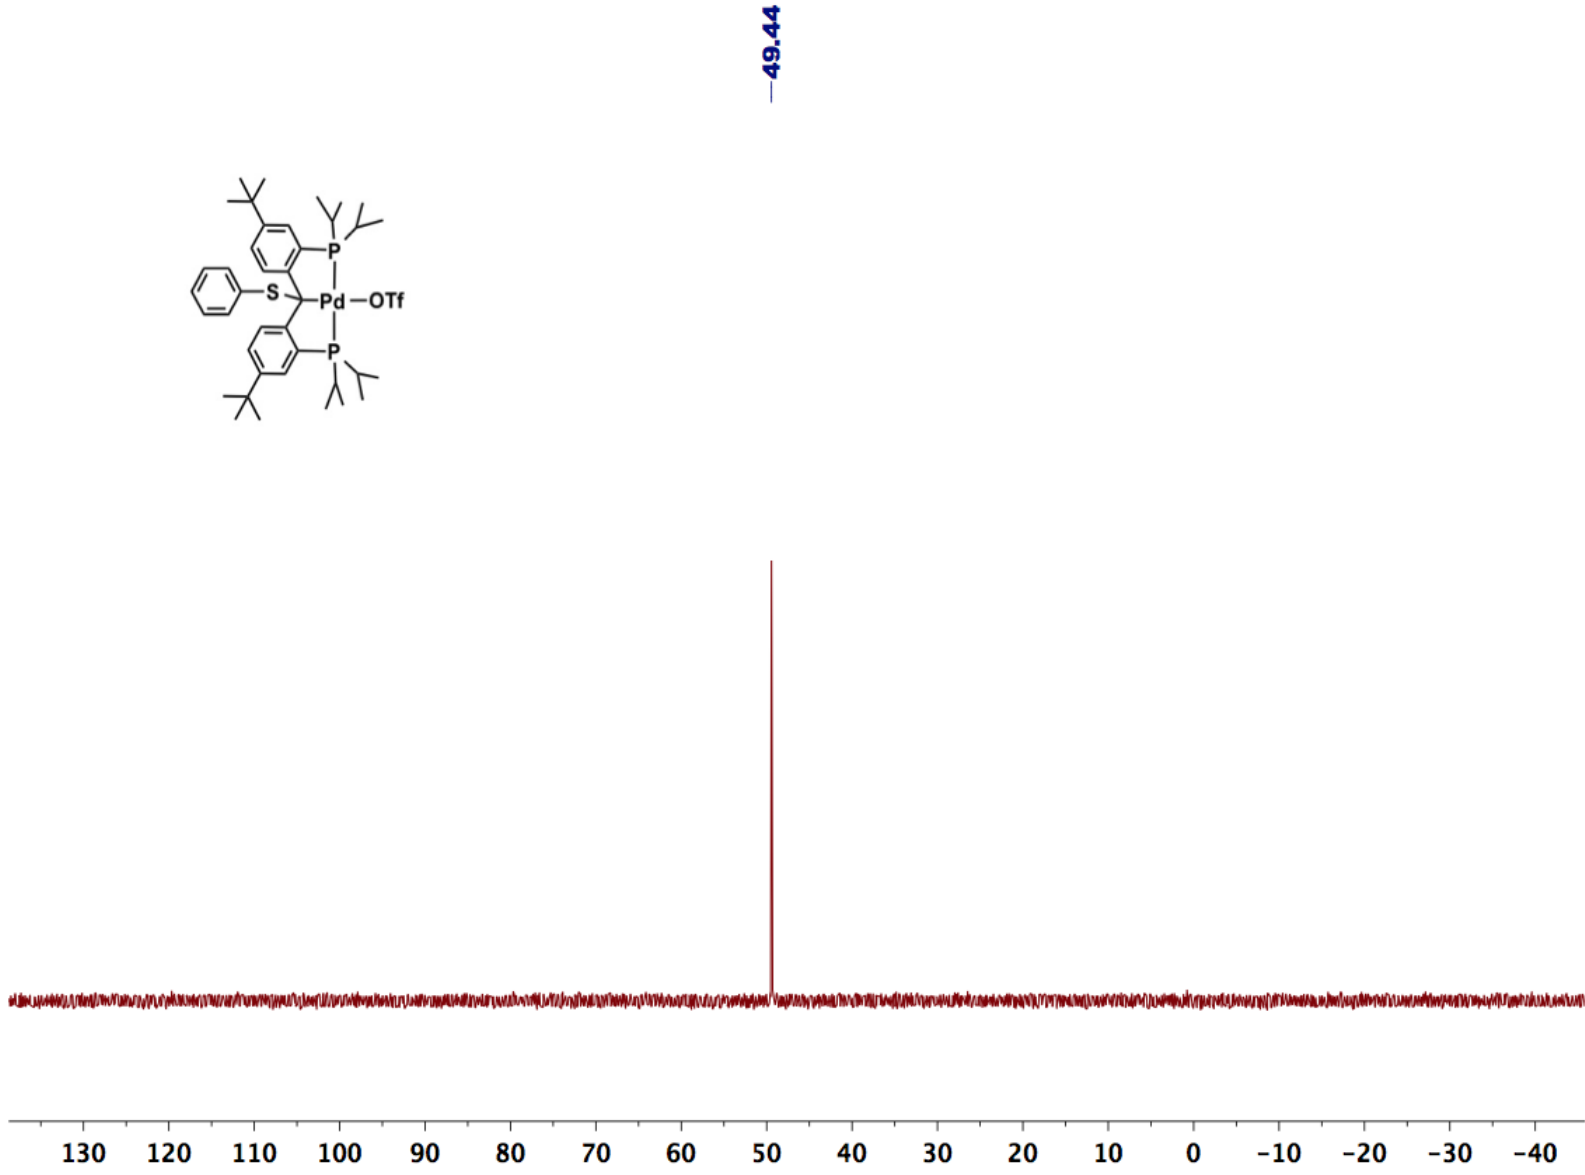

Figure S20.  $^{31}\text{P}\{^1\text{H}\}$  NMR spectrum for  $[\{\text{PC}(\text{sp}^3)(\text{SPh})\text{P}^{\text{tBu}}\}\text{PdOTf}]$  (**8**).

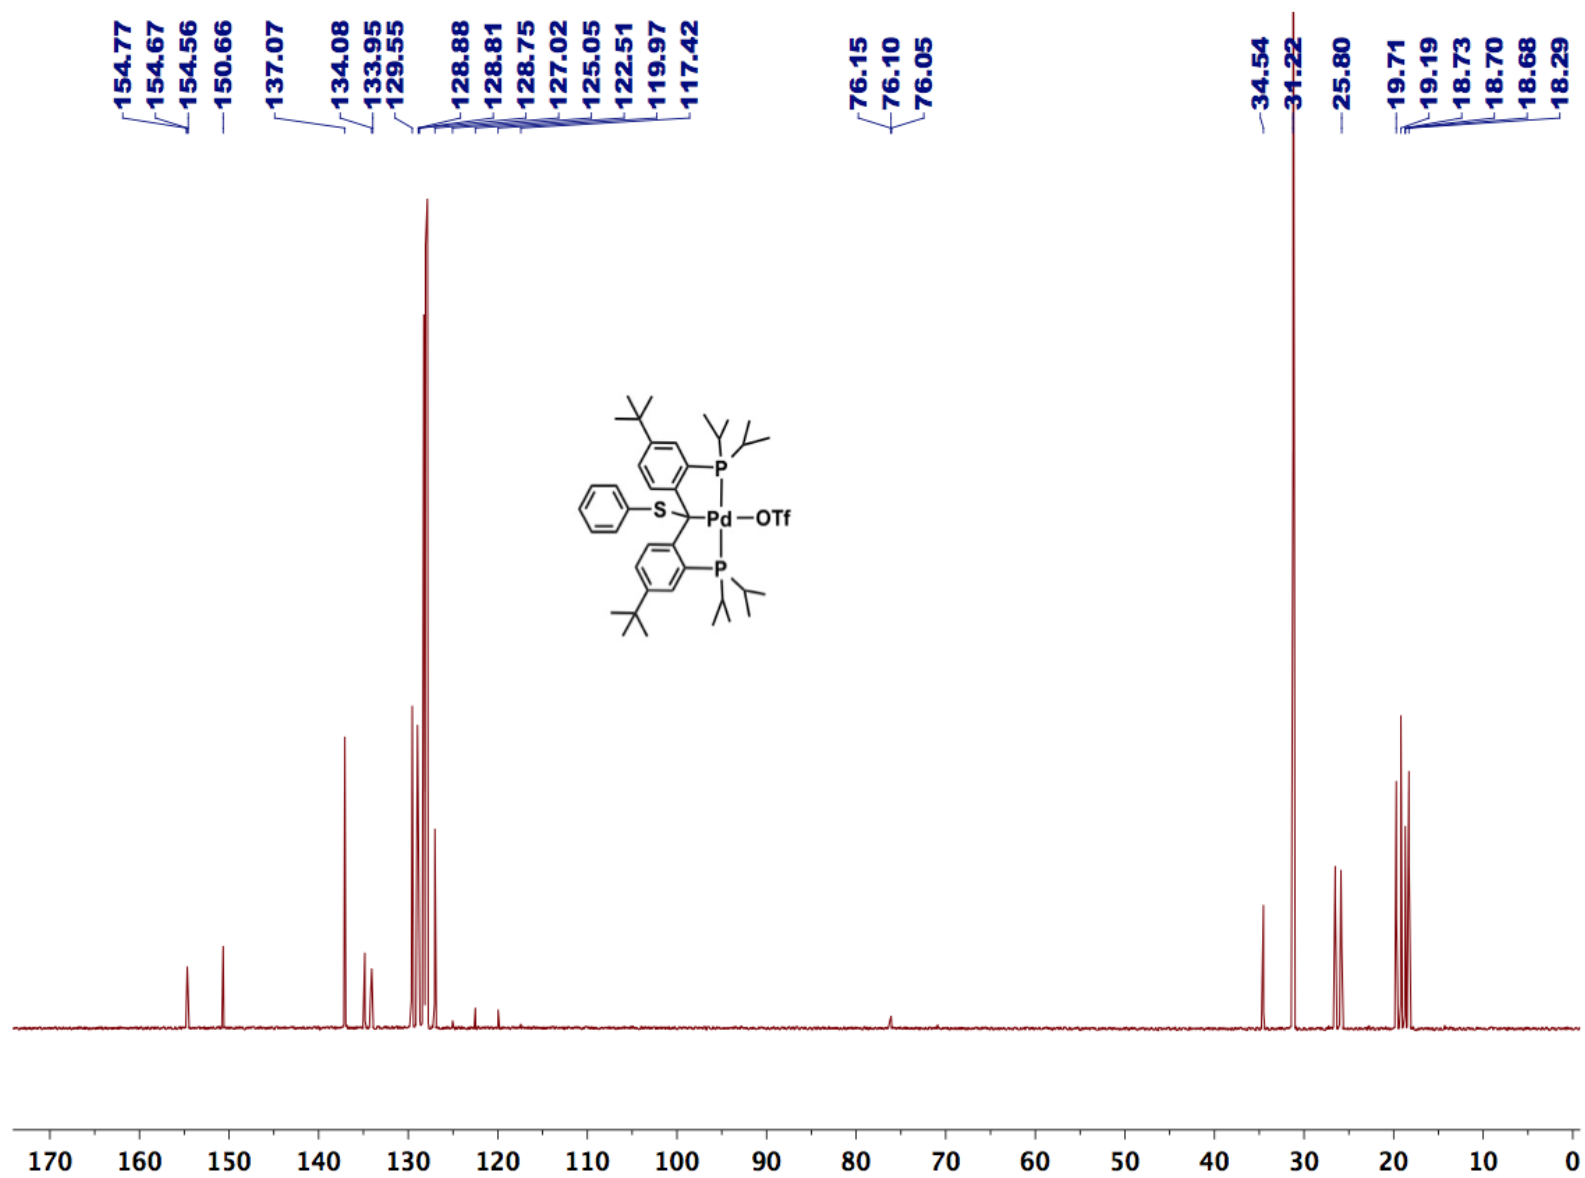

Figure S21.  $^{13}\text{C}\{^1\text{H}\}$  NMR spectrum for  $[\{\text{PC}(\text{sp}^3)(\text{SPh})\text{P}^t\text{Bu}\text{PdOTf}\}]$  (8).

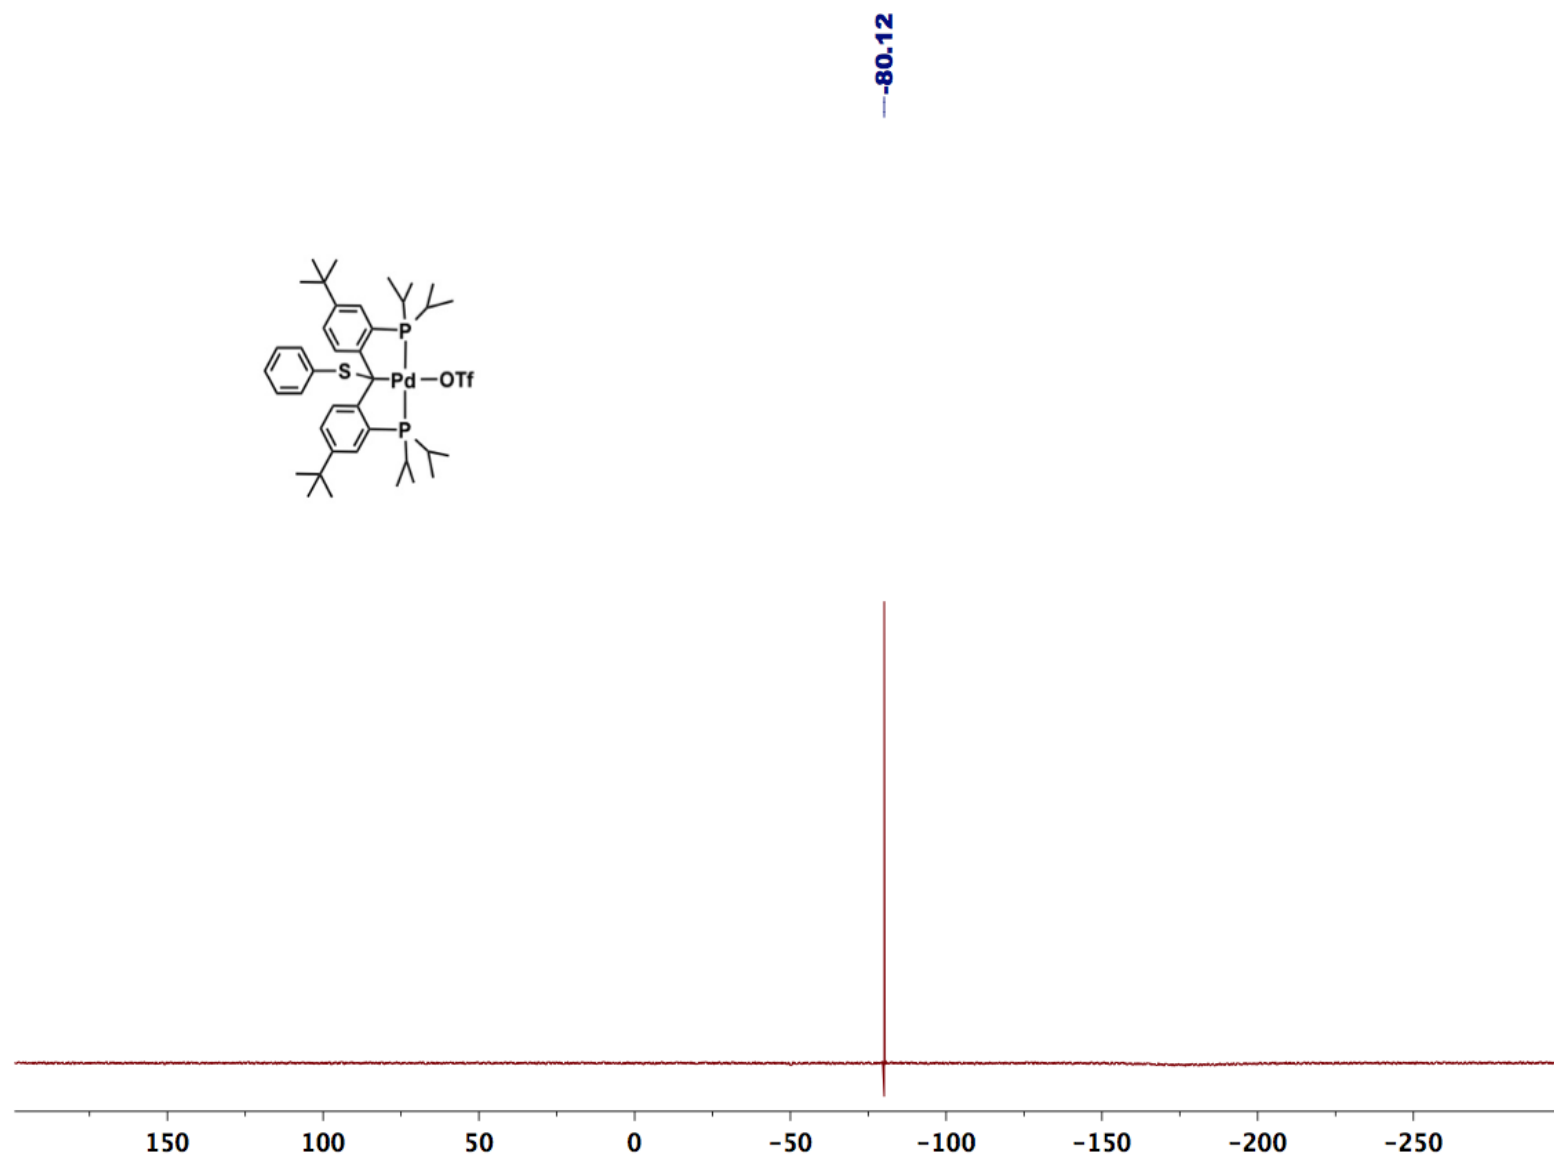

**Figure S22.**  $^{19}\text{F}$  NMR spectrum for  $[\{\text{PC}(\text{sp}^3)(\text{SPh})\text{P}^t\text{Bu}\text{PdOTf}\}]$  (**8**).

#### 4.5 NMR Spectra for $[\{\text{PC}(\text{sp}^3)(\text{SPh})\text{P}\}^t\text{BuPdSPh}]$ (**9**)

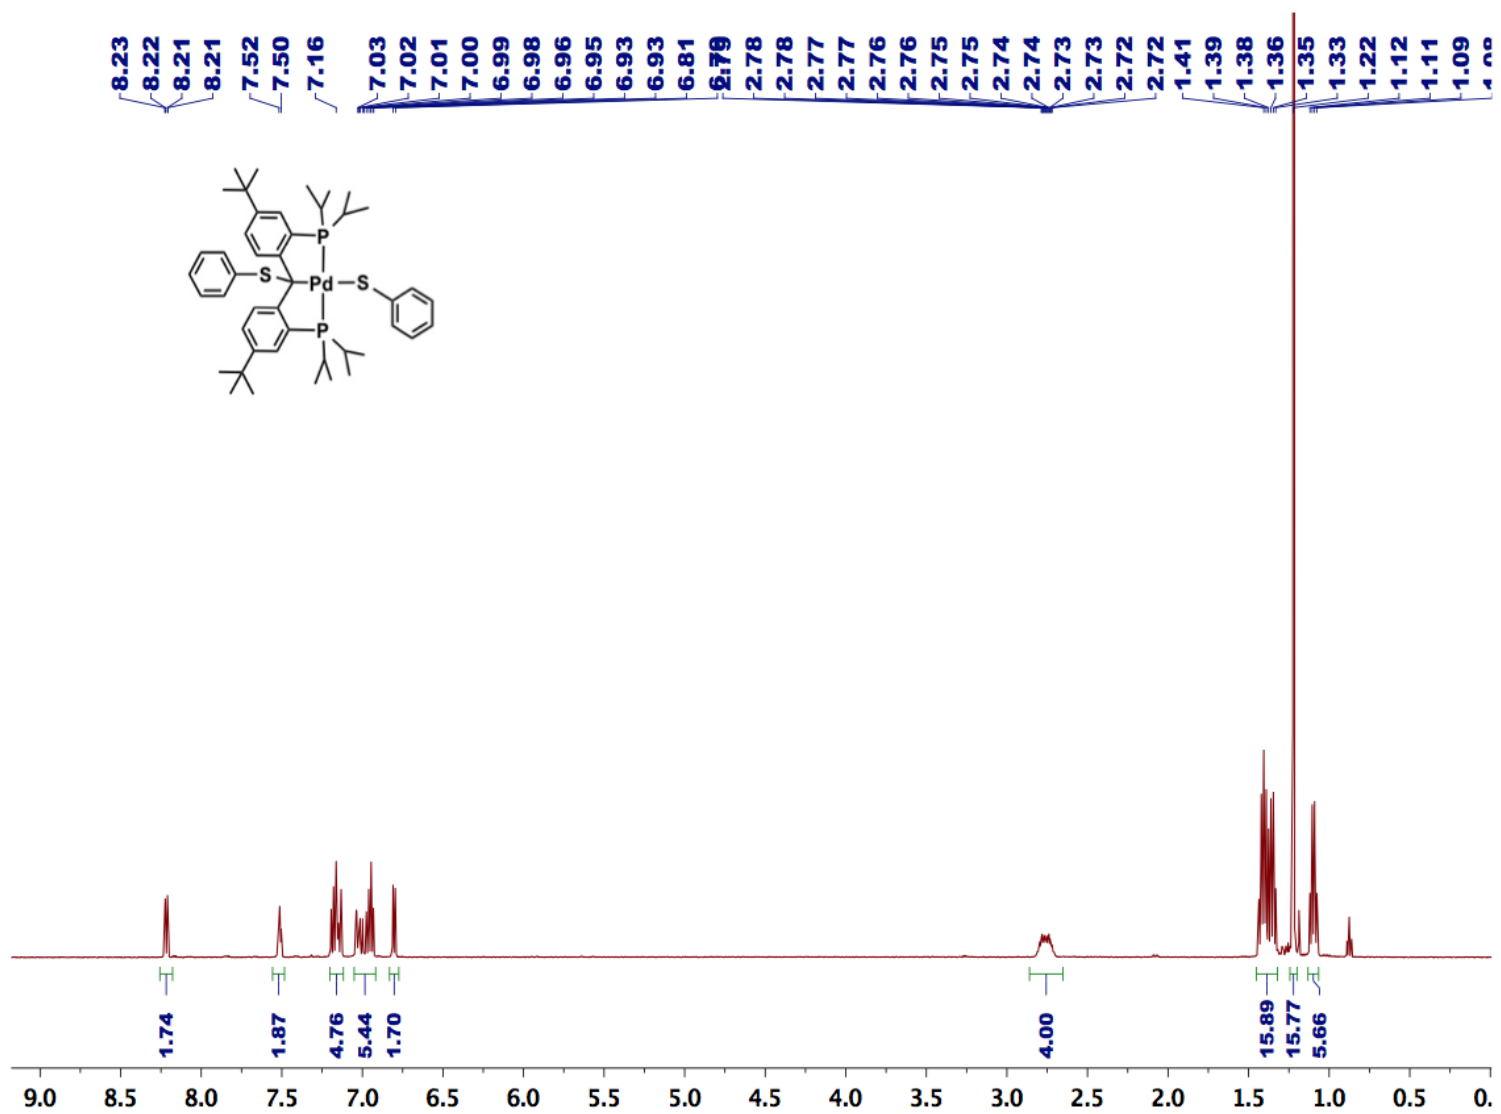

Figure S23.  $^1\text{H}$  NMR spectrum for  $[\{\text{PC}(\text{sp}^3)(\text{SPh})\text{P}\}^t\text{BuPdSPh}]$  (**9**).



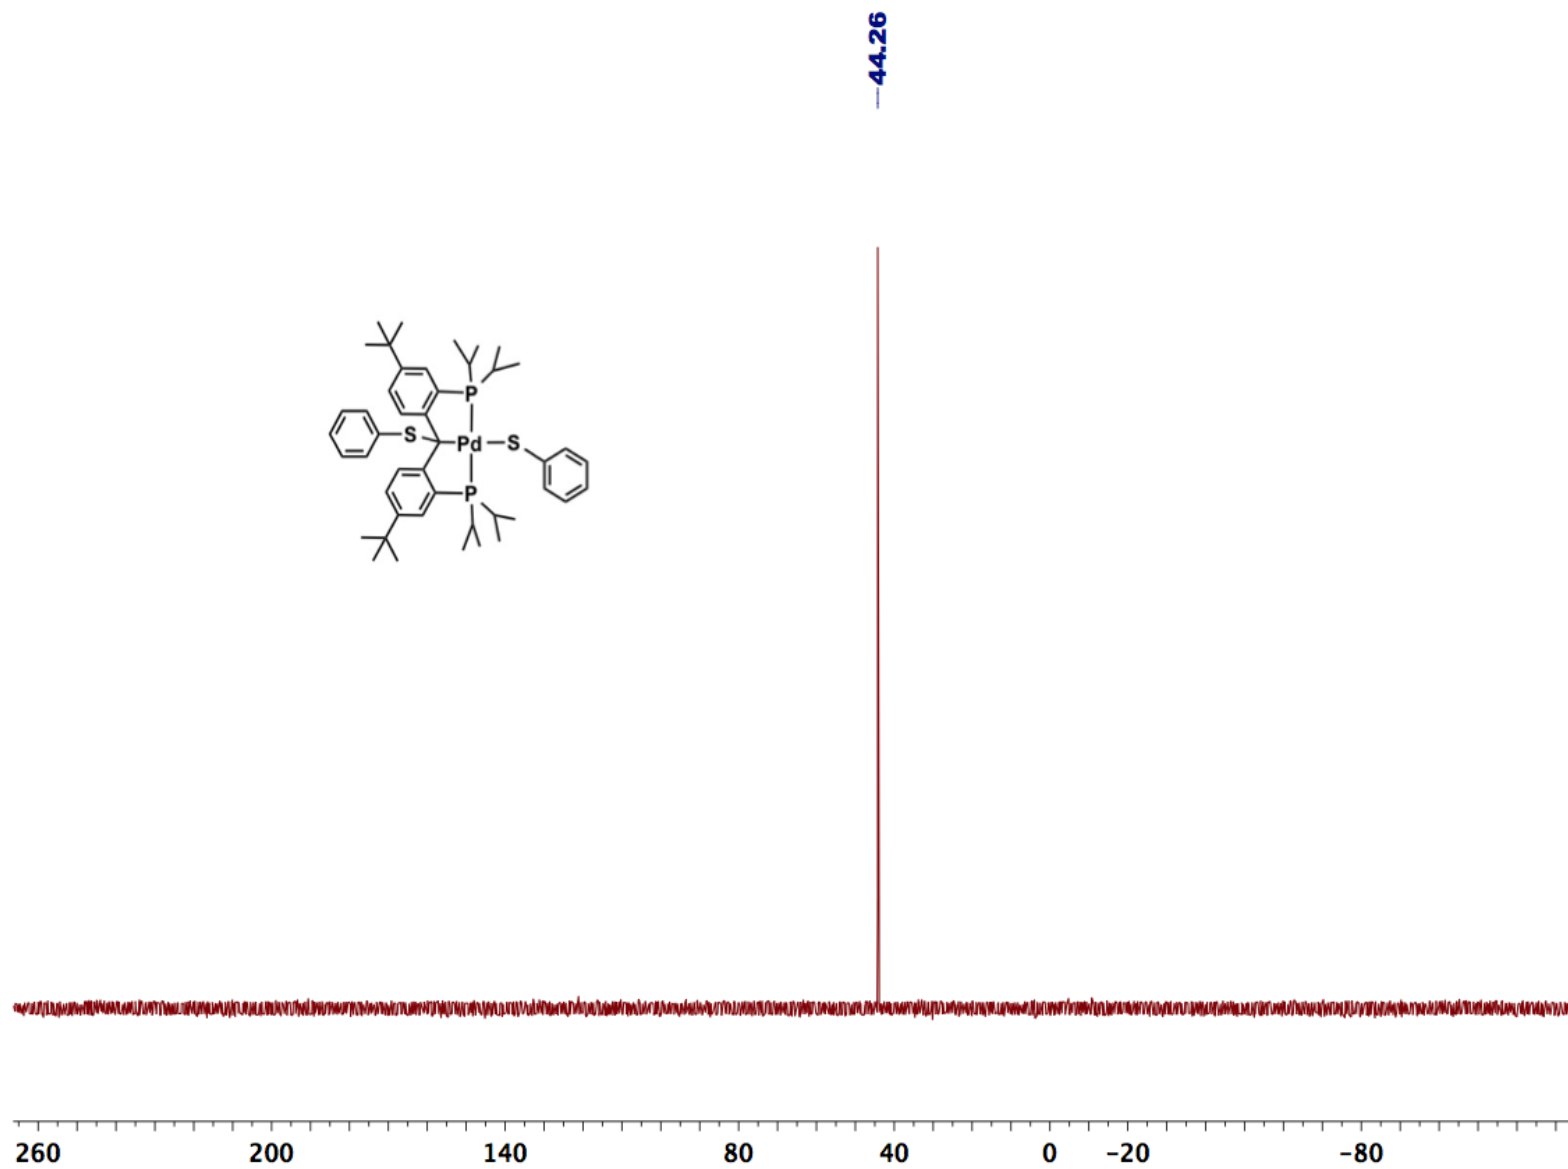

Figure S24.  $^{31}\text{P}\{^1\text{H}\}$  NMR spectrum for  $[\{\text{PC}(\text{sp}^3)(\text{SPh})\text{P}^{\text{tBu}}\text{PdSPh}]$  (**9**).

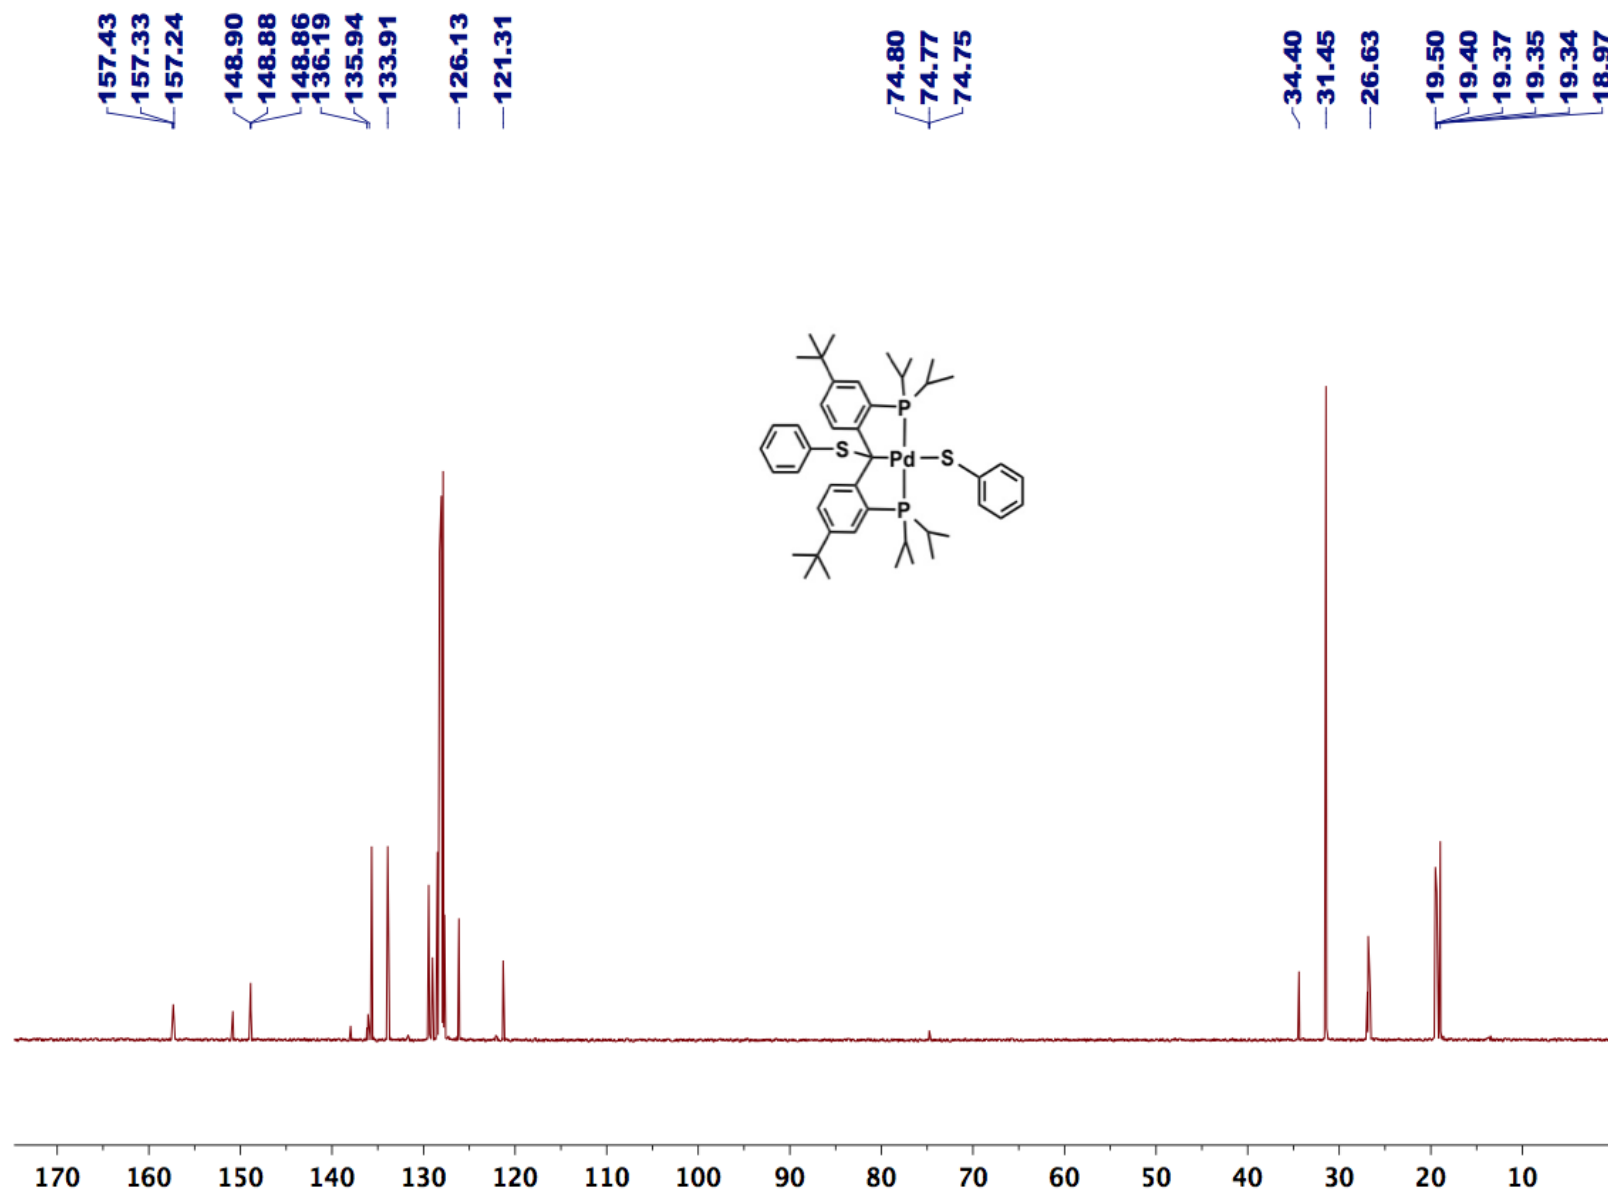

Figure S25.  $^{13}\text{C}\{^1\text{H}\}$  NMR spectrum for  $[\{\text{PC}(\text{sp}^3)(\text{SPh})\text{P}^t\text{Bu}\text{PdSPh}\}]$  (9).



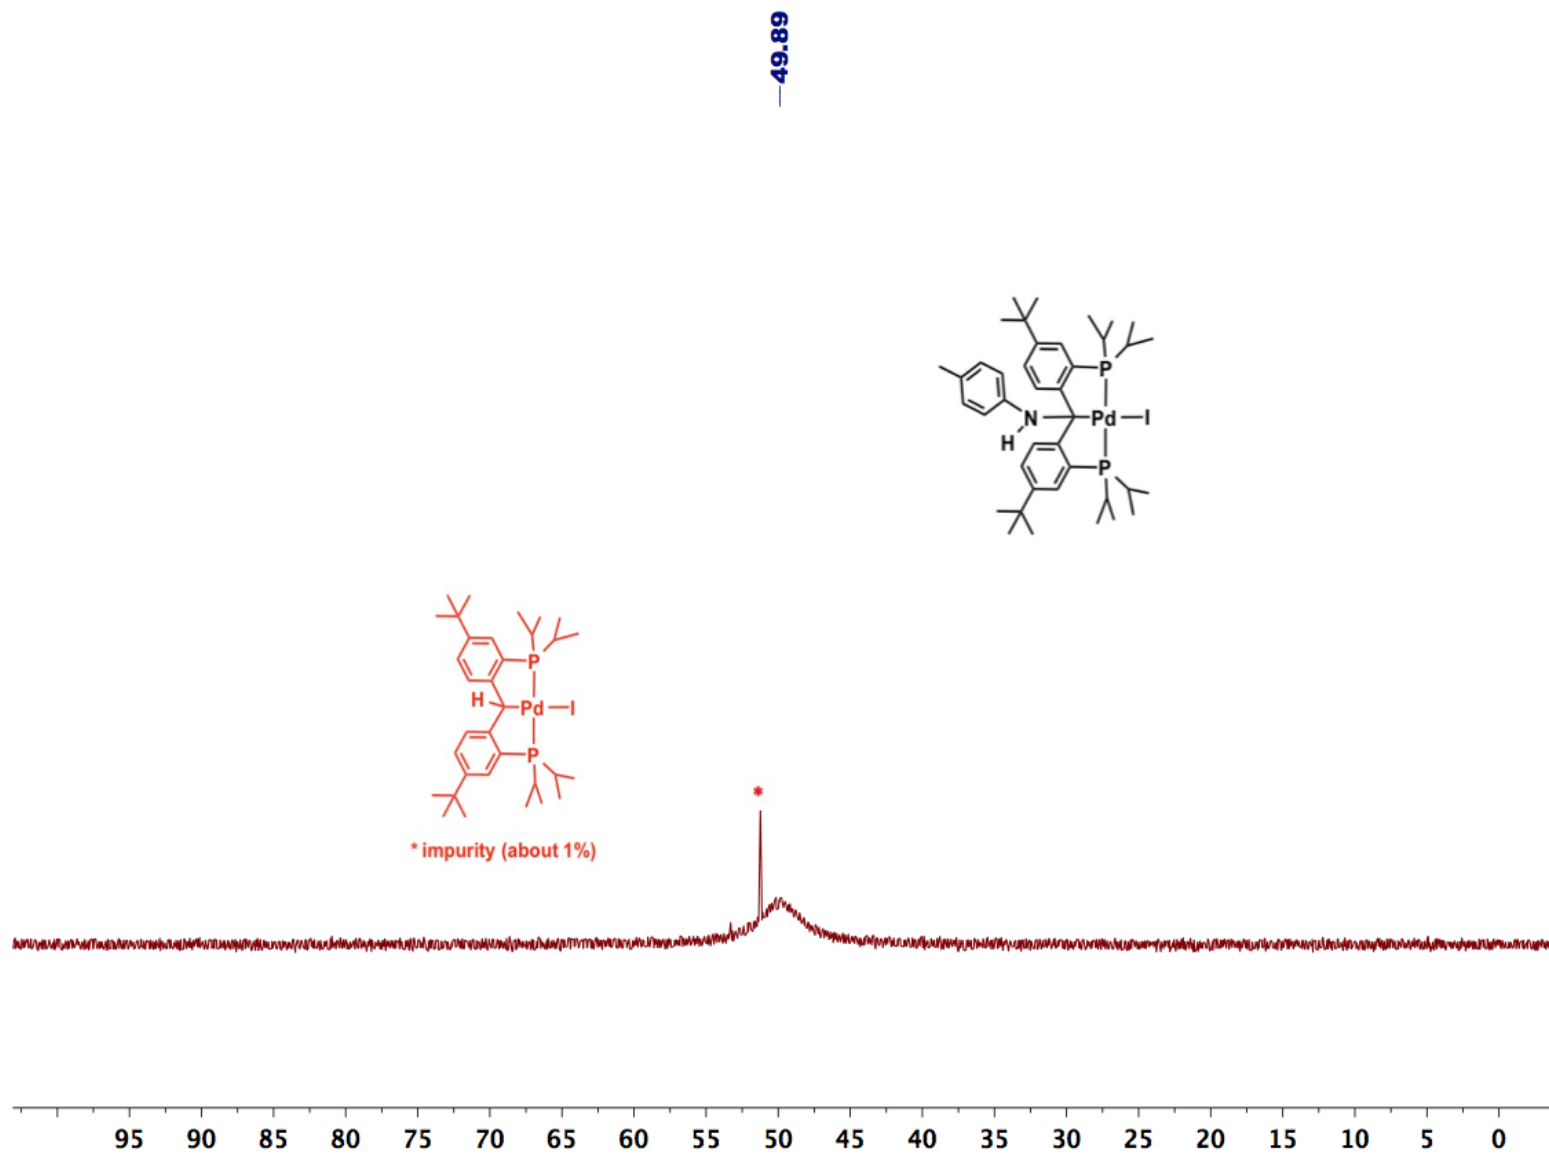

Figure S27.  $^{31}\text{P}\{^1\text{H}\}$  NMR spectrum for  $[\{\text{PC}(\text{sp}^3)(\text{NH}^t\text{Tol})\text{P}^t\text{BuPdI}]$  (10).

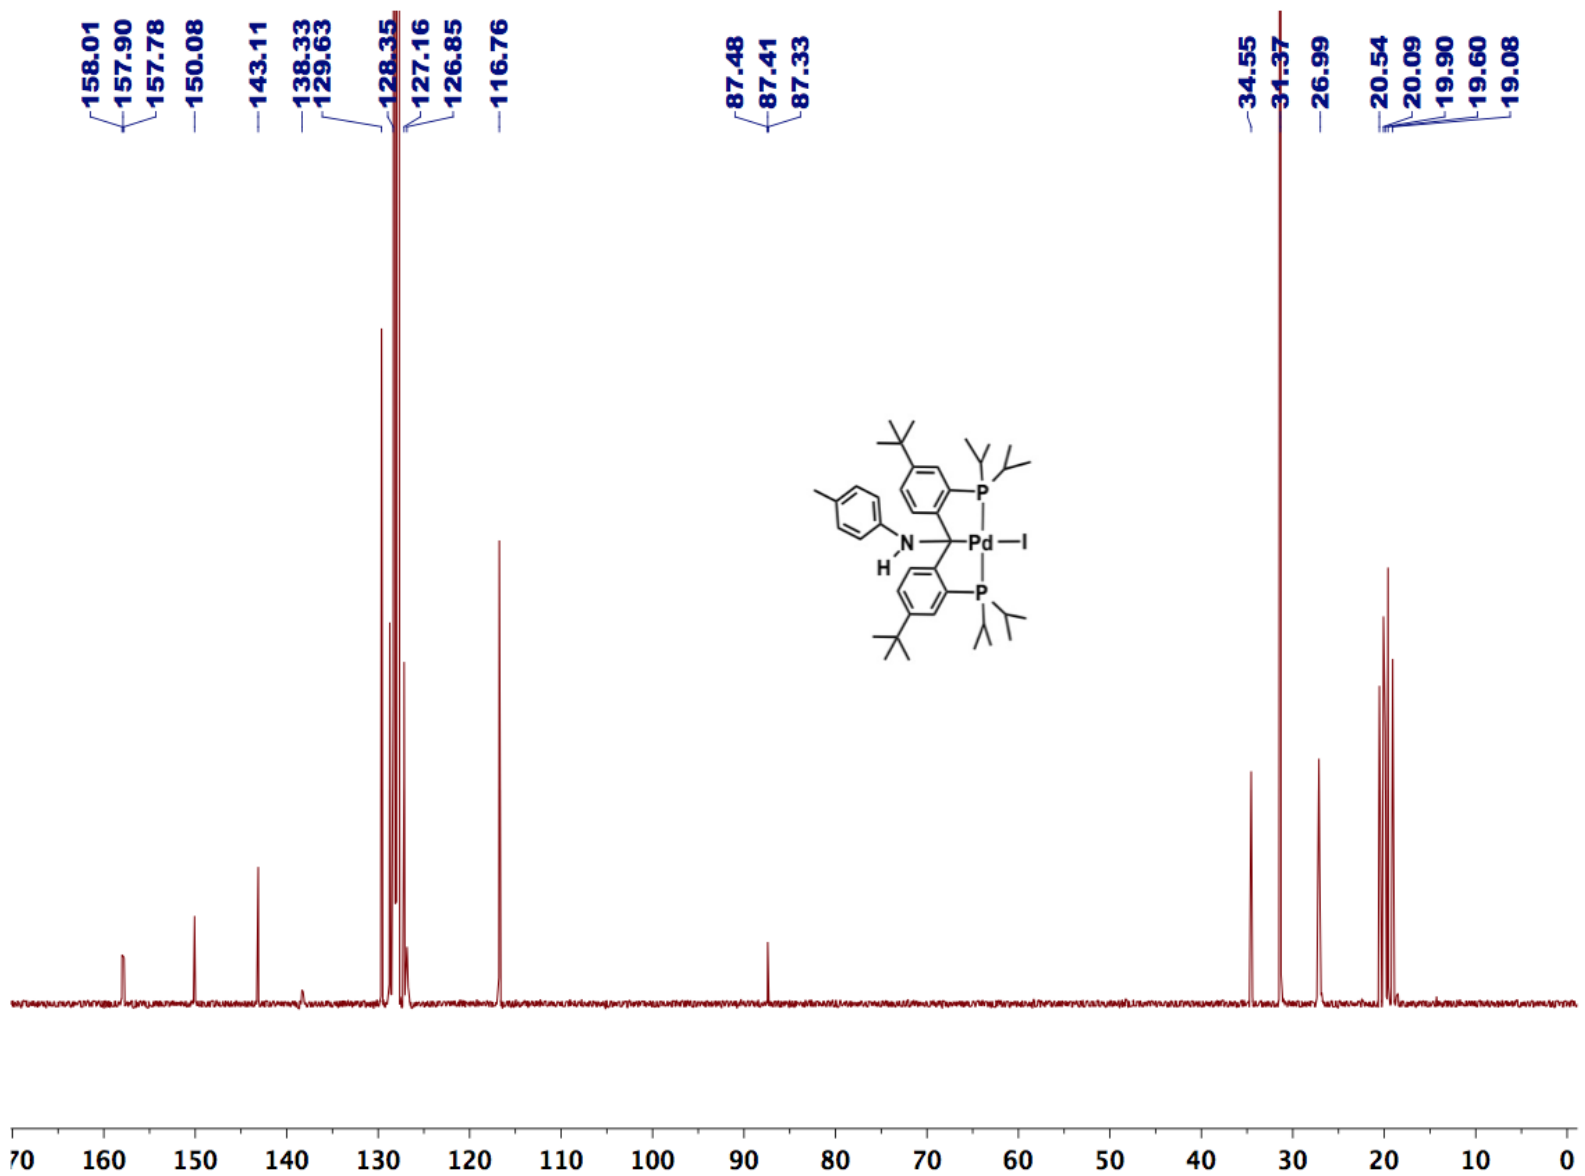

Figure S28.  $^{13}\text{C}\{^1\text{H}\}$  NMR spectrum for  $[\{\text{PC}(\text{sp}^3)(\text{NH}^t\text{Tol})\text{P}^t\text{Bu}\text{PdI}]$  (**10**).

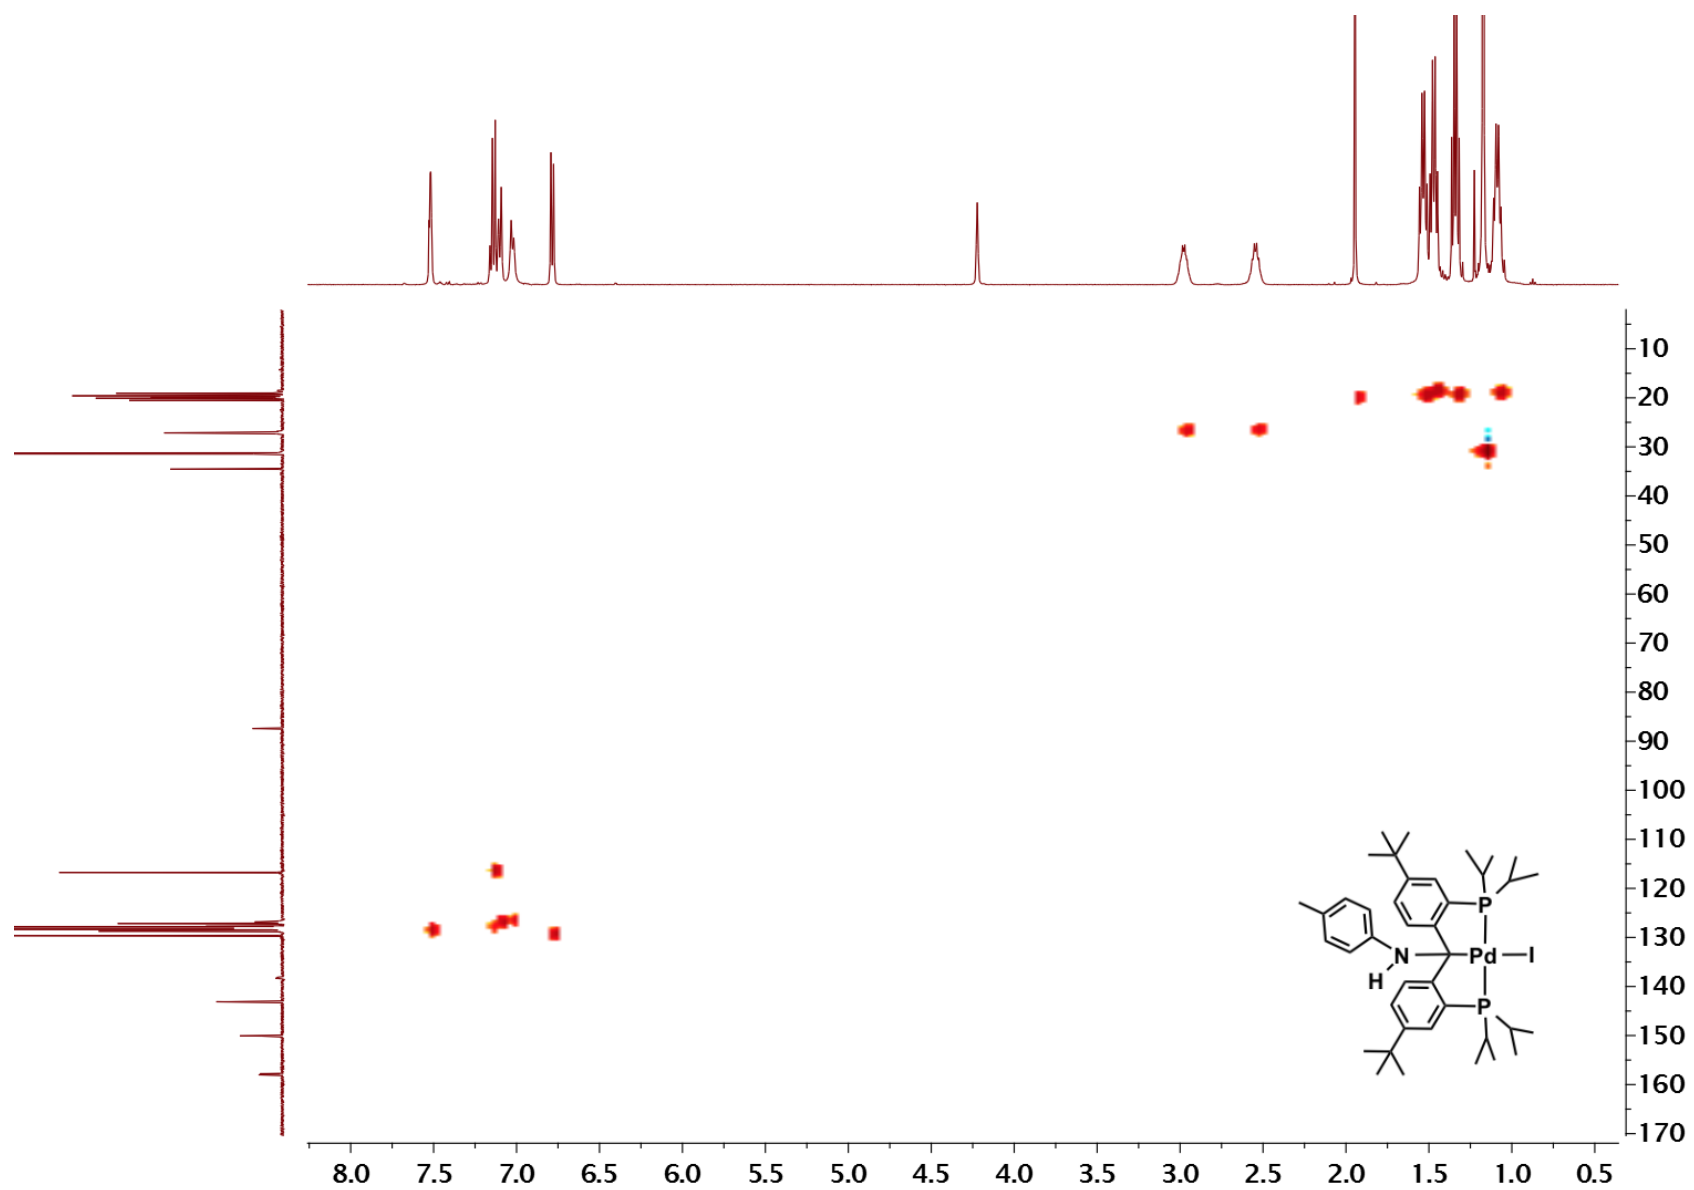

**Figure S29.**  $^1\text{H}$ - $^{13}\text{C}$  HSQC NMR spectrum for  $[\{\text{PC}(\text{sp}^3)(\text{NH}^i\text{Tol})\text{P}^t\text{Bu}\}\text{PdI}]$  (**10**).

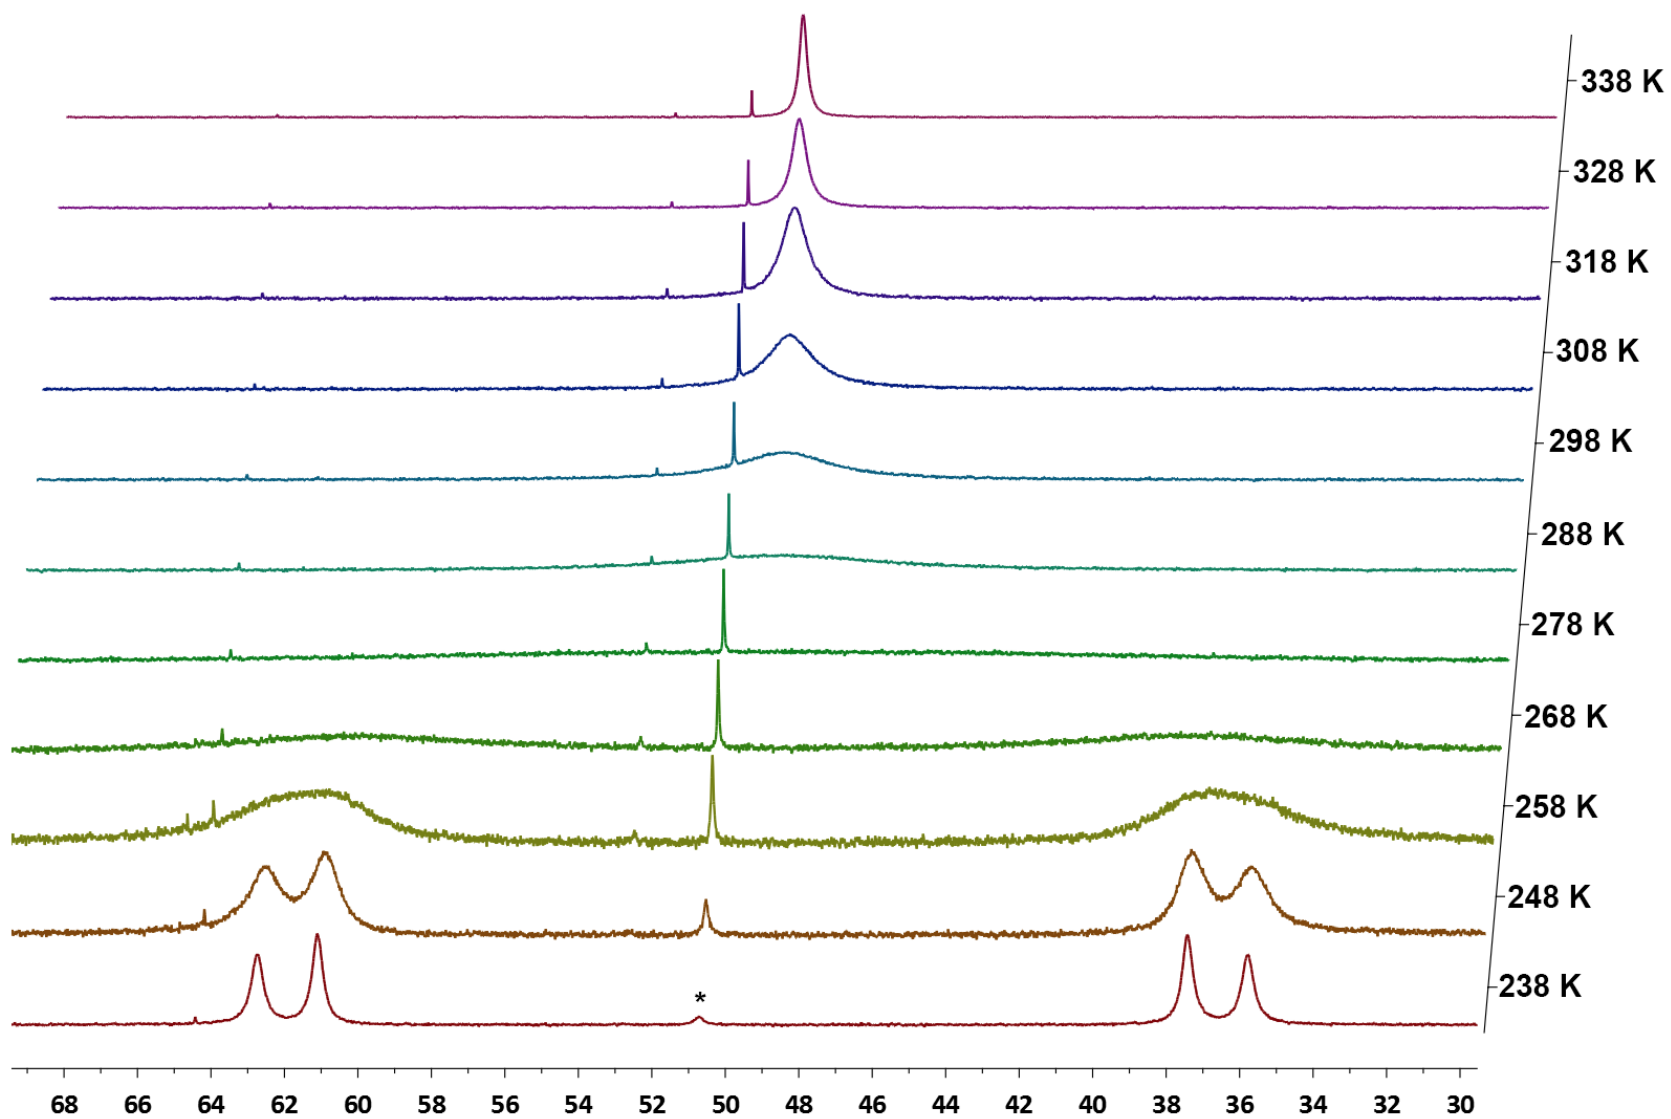

**Figure S30.** Variable temperature  $^{31}\text{P}\{^1\text{H}\}$  NMR spectra for  $[\{\text{PC}(\text{sp}^3)(\text{NH}^i\text{Tol})\text{P}\}^{\text{Bu}}\text{PdI}]$  (**10**). (\*) designates the small amount of impurity of **6**.

4.7 NMR Spectra for  $[\{\text{PC}(\text{sp}^3)(\text{OPh})\text{P}\}^{\text{tBu}}\text{PdI}]$  (11)

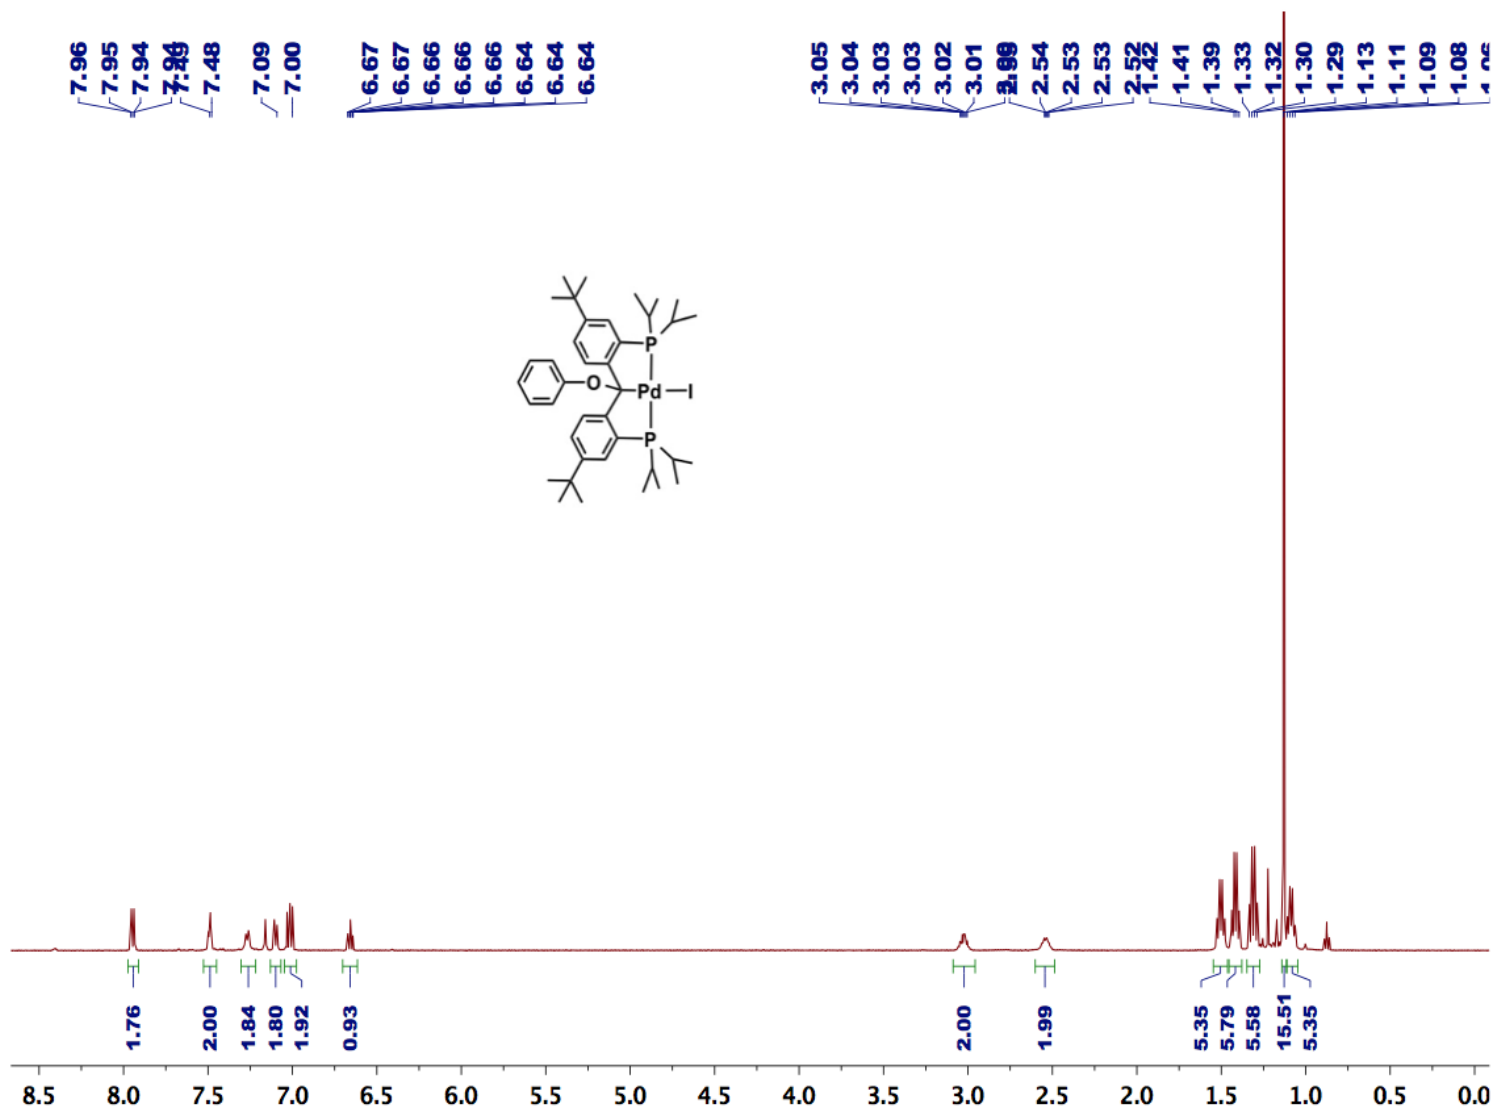

Figure S31.  $^1\text{H}$  NMR spectrum for  $[\{\text{PC}(\text{sp}^3)(\text{OPh})\text{P}\}^{\text{tBu}}\text{PdI}]$  (11).



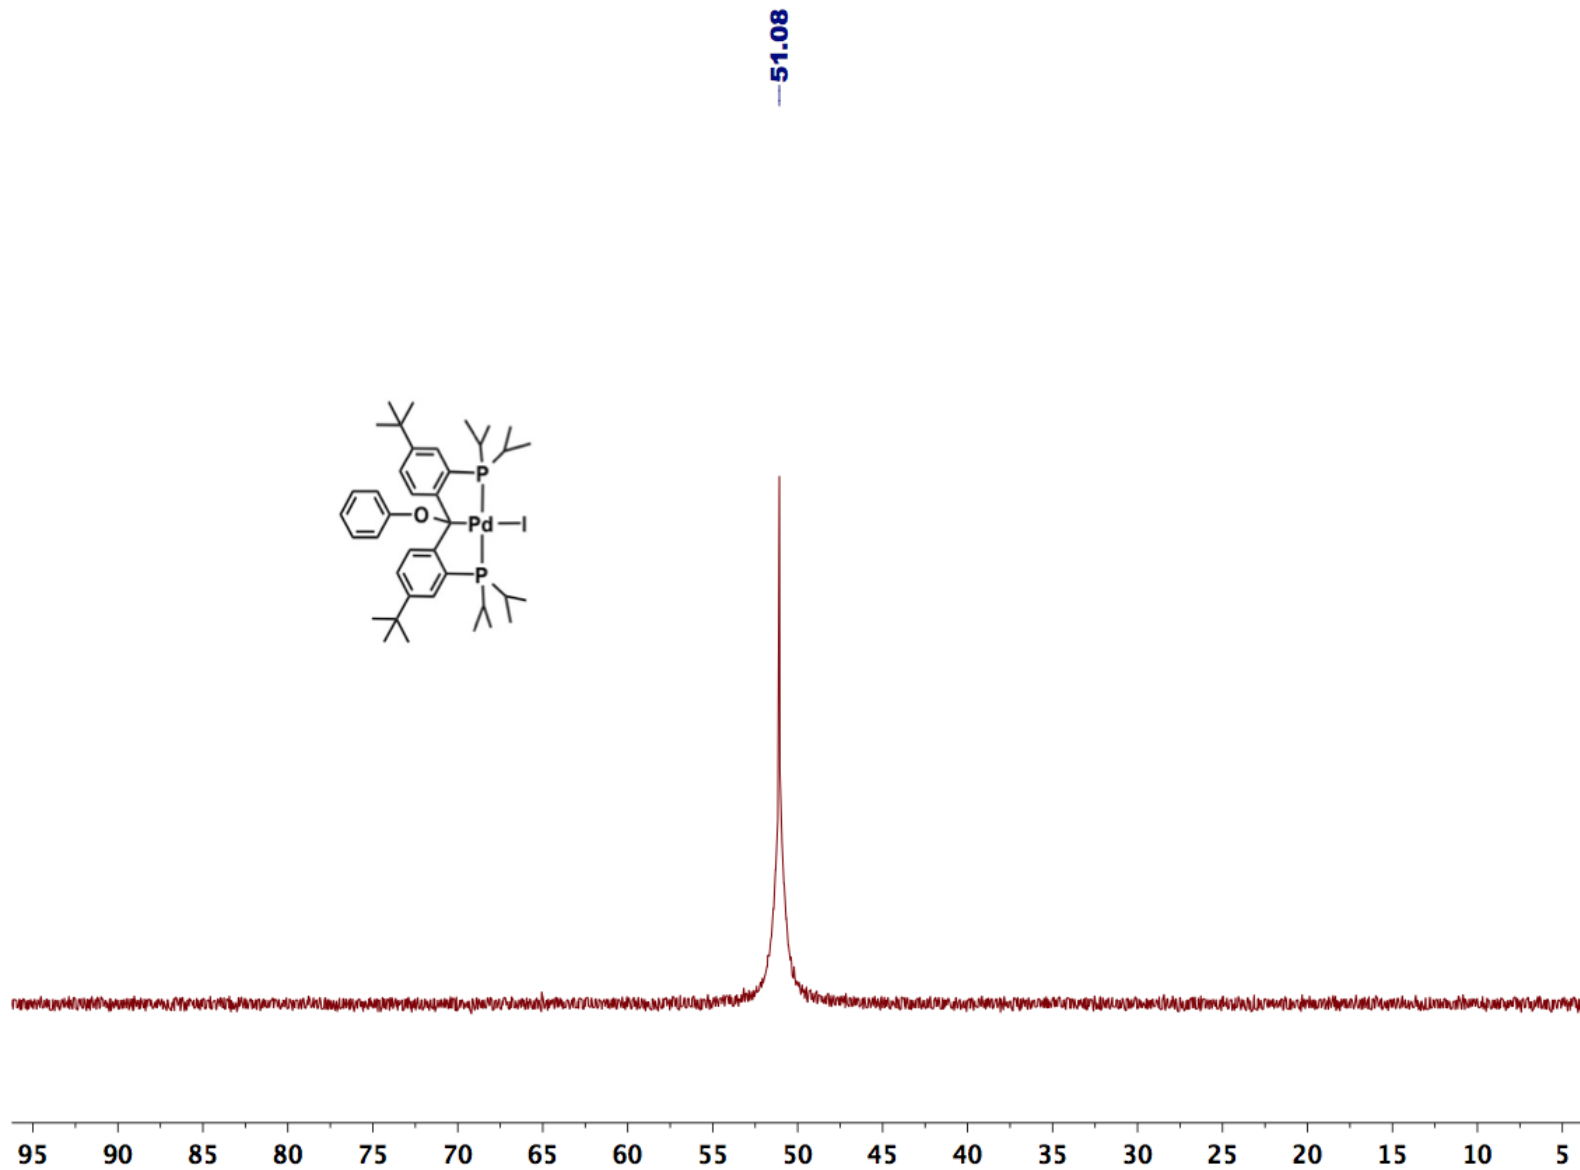

Figure S32.  $^{31}\text{P}\{^1\text{H}\}$  NMR spectrum for  $[\{\text{PC}(\text{sp}^3)(\text{OPh})\text{P}^i\text{Bu}\}\text{PdI}]$  (**11**).

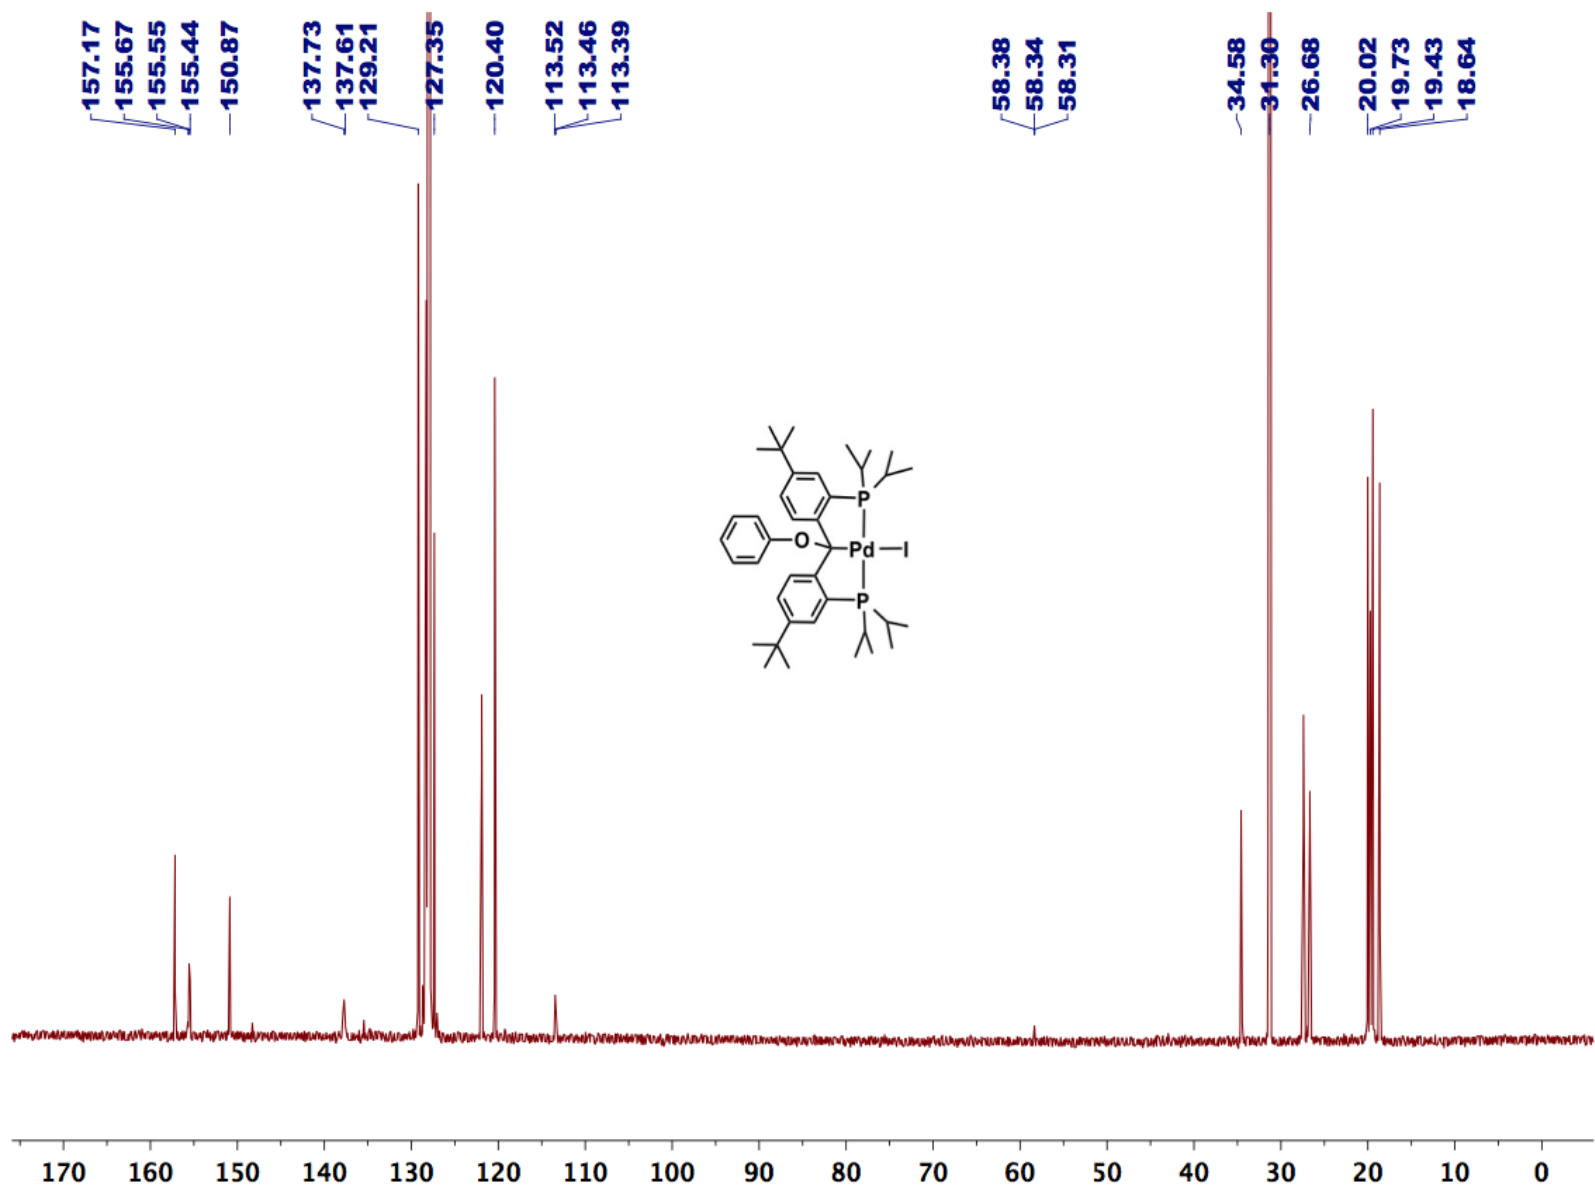

Figure S33.  $^{13}\text{C}\{^1\text{H}\}$  NMR spectrum for  $[\{\text{PC}(\text{sp}^3)(\text{OPh})\text{P}\}^t\text{BuPdI}]$  (11).

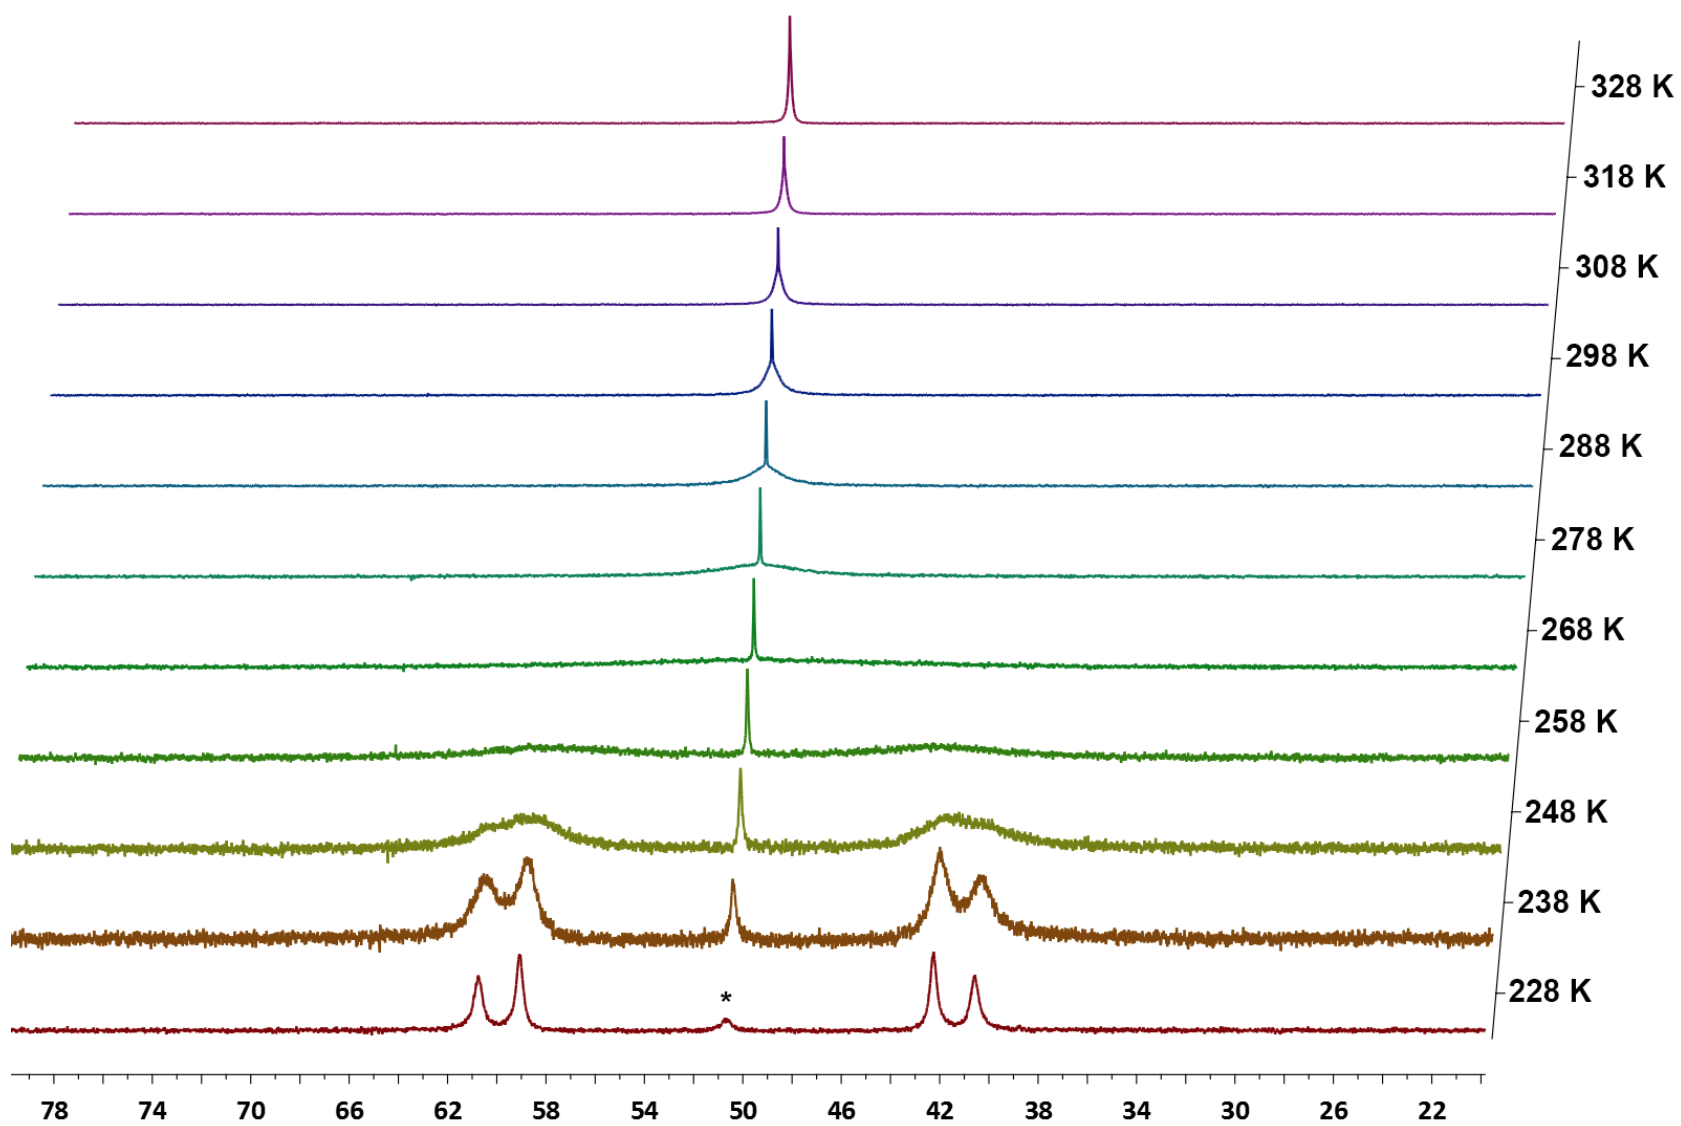

**Figure S34.** Variable temperature  $^{31}\text{P}\{^1\text{H}\}$  NMR spectra for  $[\{\text{PC}(\text{sp}^3)(\text{OPh})\text{P}\}^t\text{BuPdI}]$  (**11**). (\*) designates the small amount of impurity of **6**.

4.8 NMR Spectra for  $[\{\text{PC}(\text{sp}^3)(\text{PMe}_3)\text{P}\}^{\text{tBu}}\text{PdI}][\text{BAr}_4^{\text{F}}]$  (12)

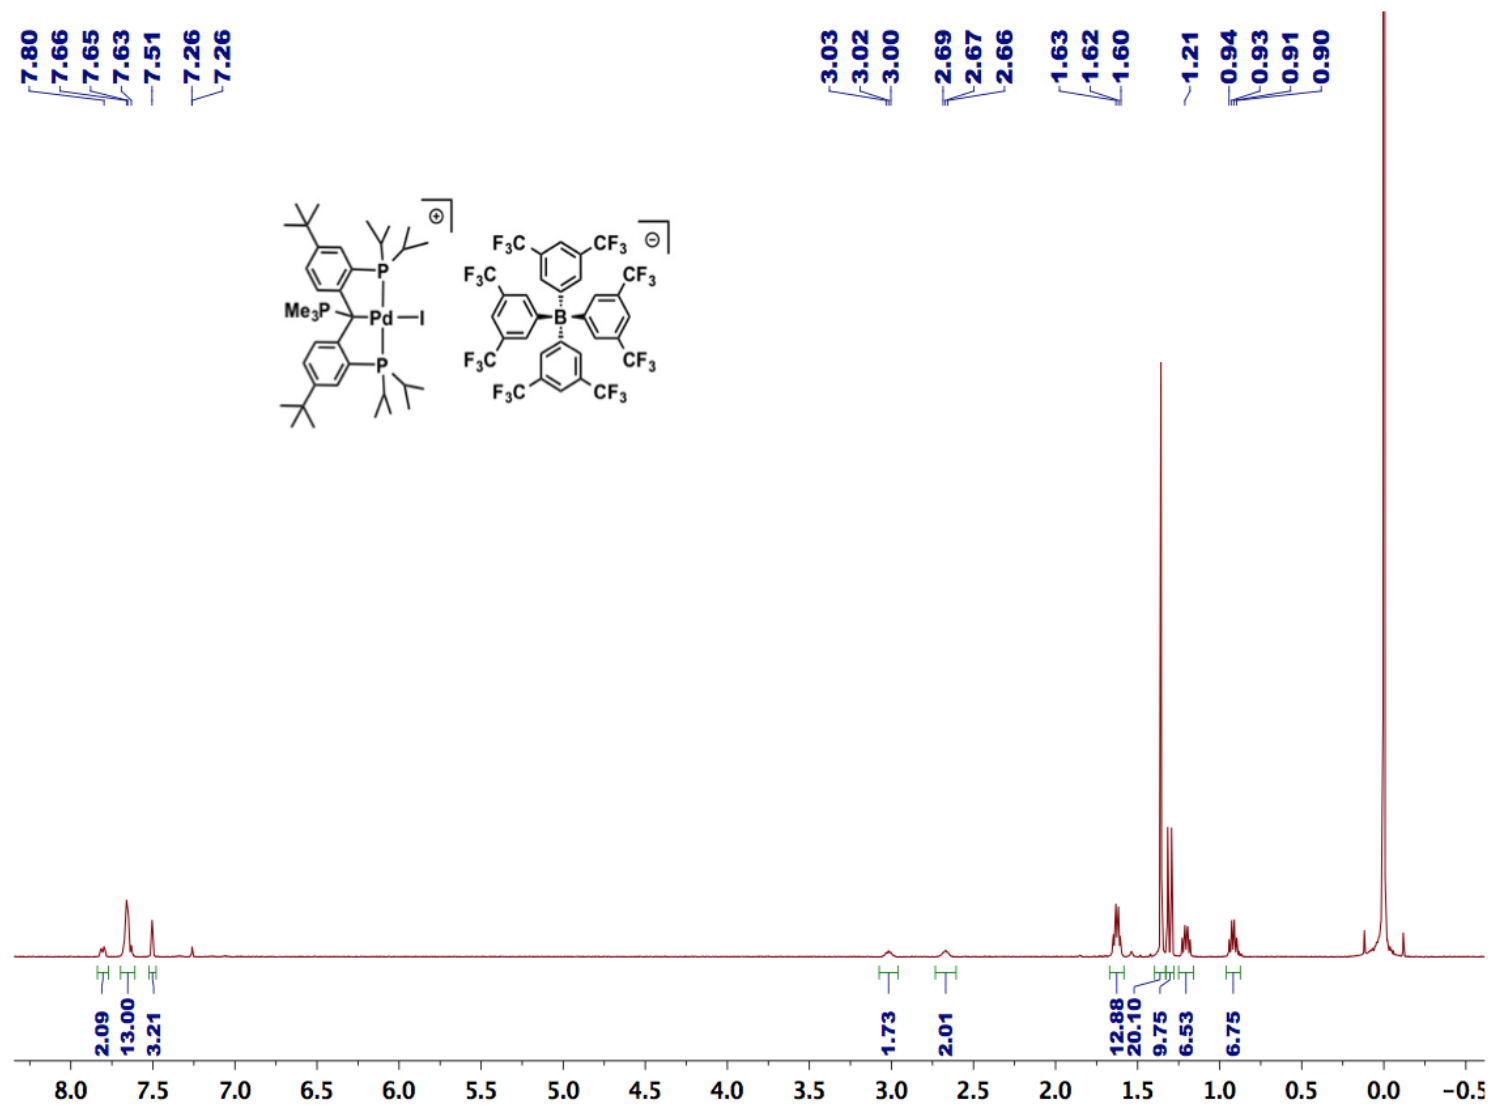

Figure S35.  $^1\text{H}$  NMR spectrum for  $[\{\text{PC}(\text{sp}^3)(\text{PMe}_3)\text{P}\}^{\text{tBu}}\text{PdI}][\text{BAr}_4^{\text{F}}]$  (12).

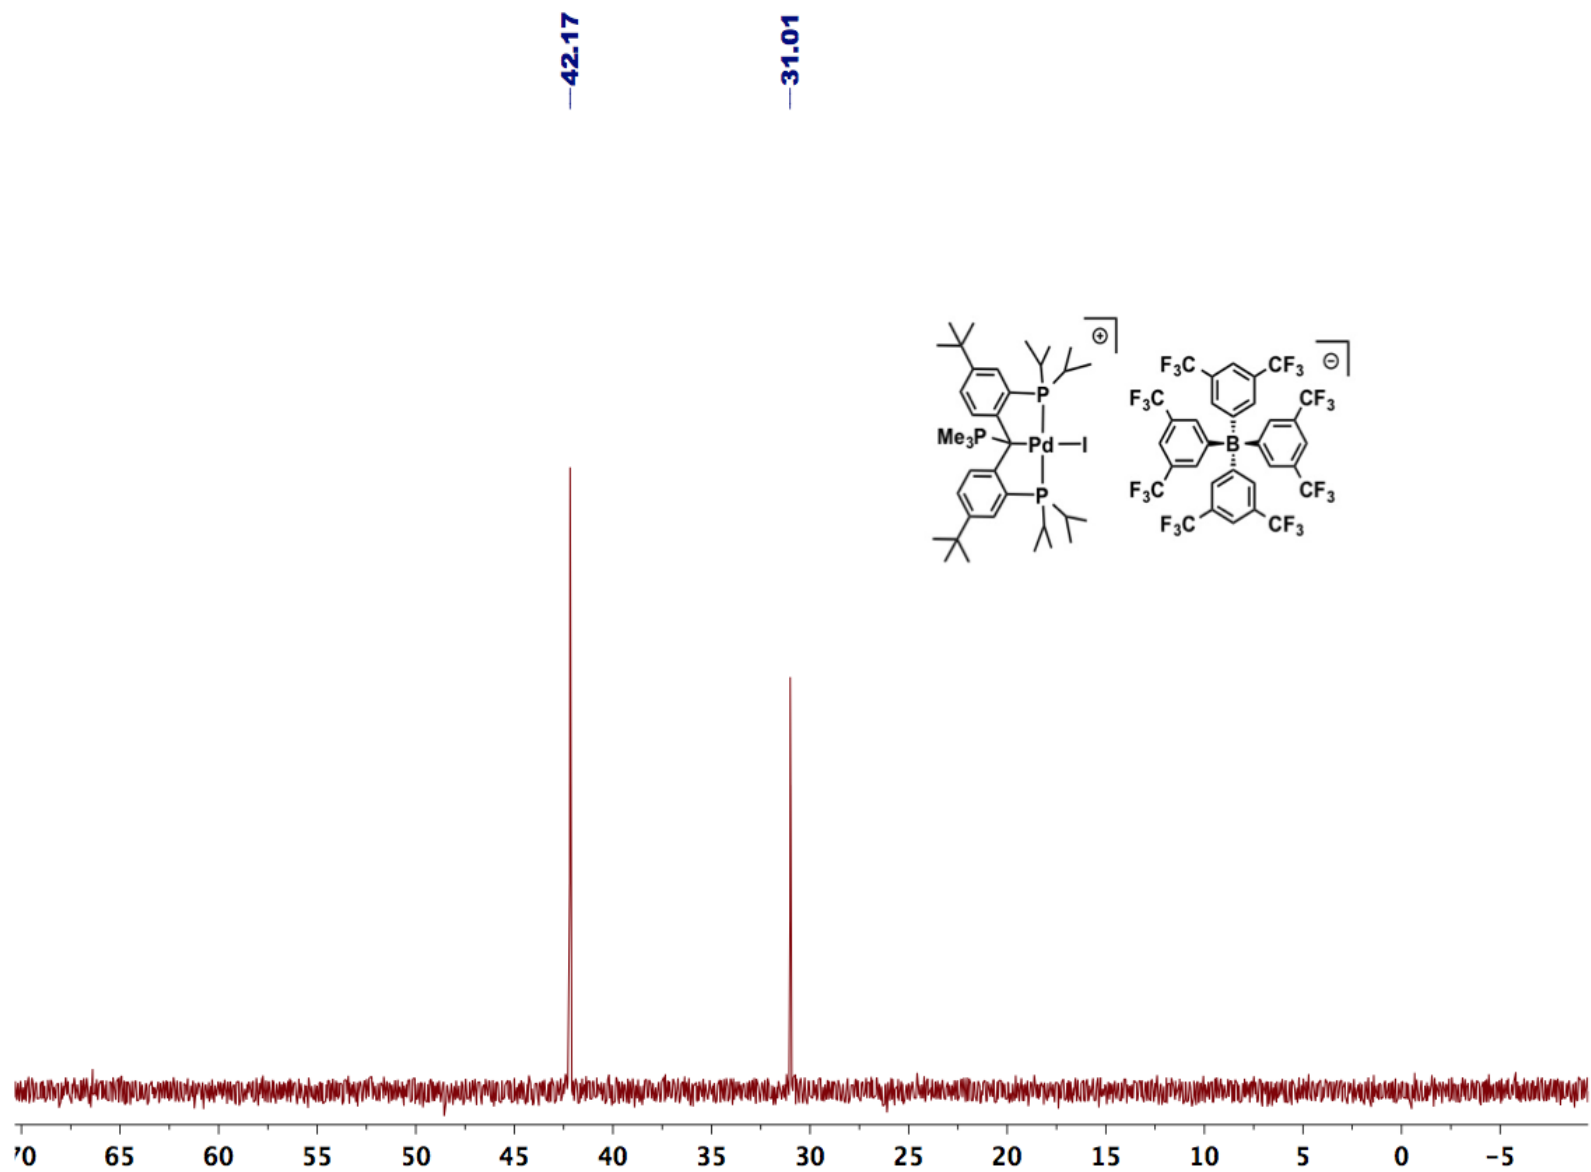

Figure S36.  $^{31}\text{P}\{^1\text{H}\}$  NMR spectrum for  $[\{\text{PC}(\text{sp}^3)(\text{PMe}_3)\text{P}\}^{\text{tBu}}\text{PdI}][\text{BAr}_4^{\text{F}}]$  (**12**).

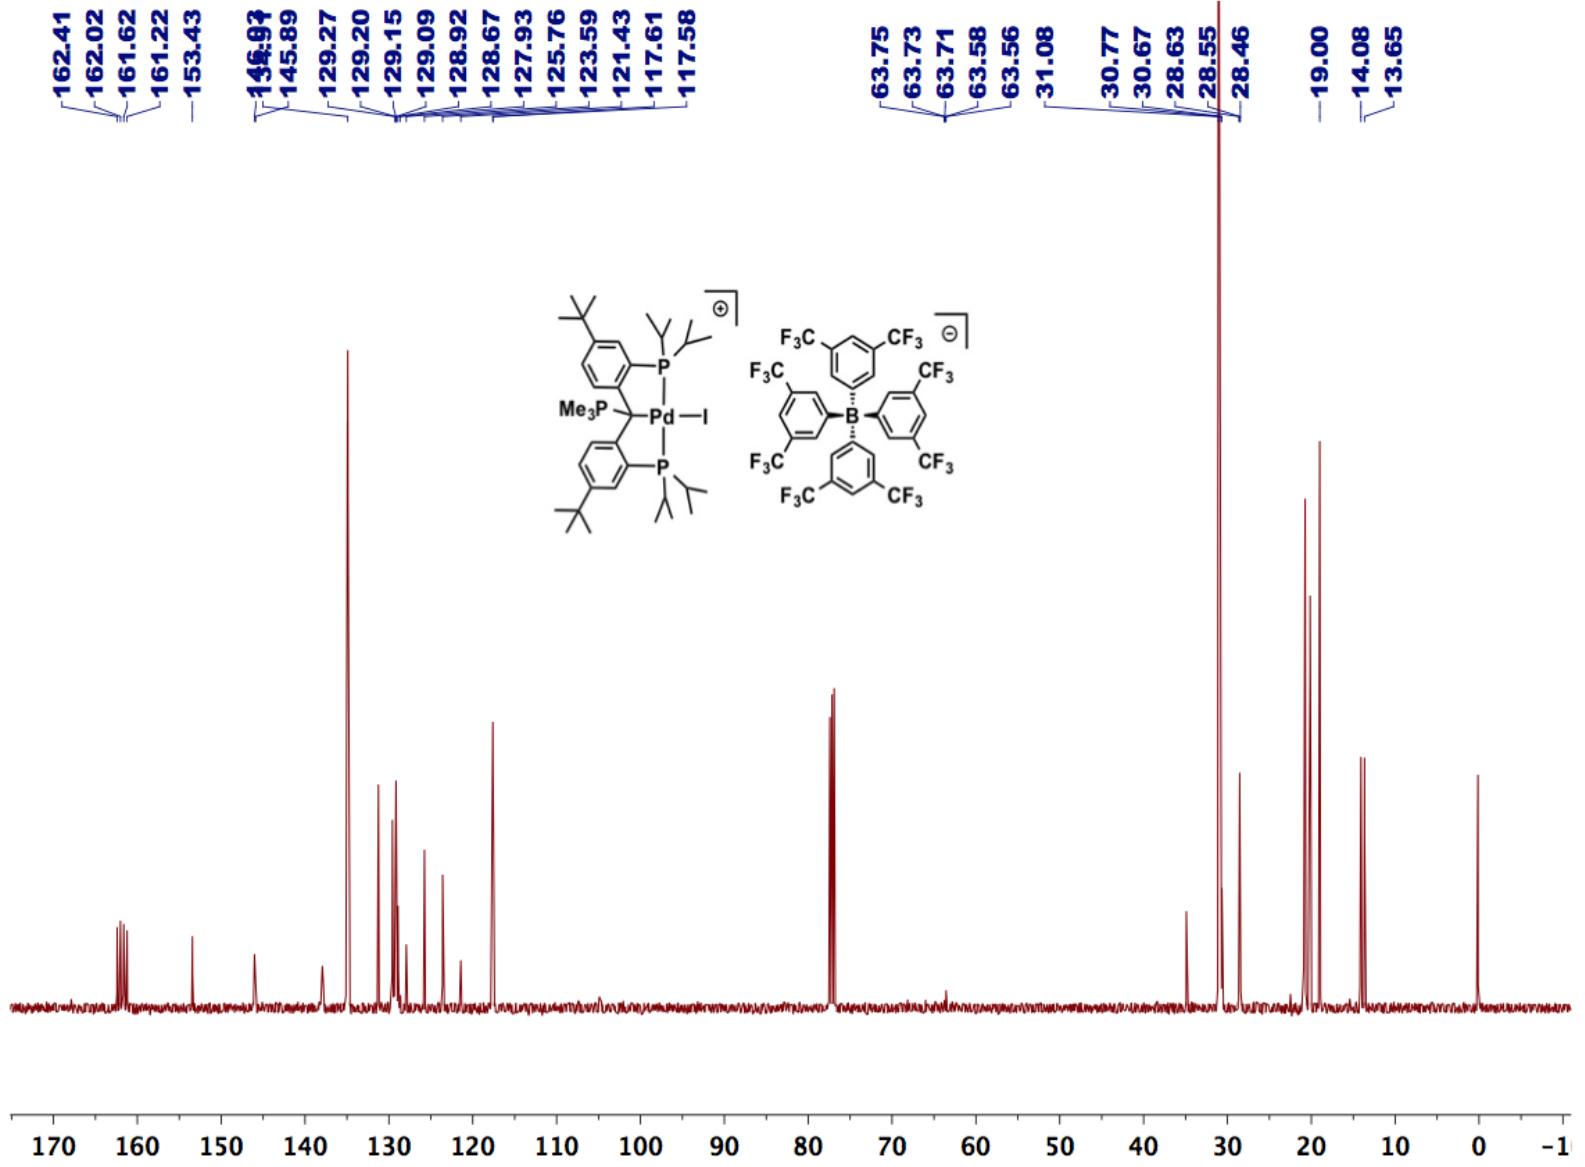

Figure S37.  $^{13}\text{C}\{^1\text{H}\}$  NMR spectrum for  $[\{\text{PC}(\text{sp}^3)(\text{PMe}_3)\text{P}^t\text{Bu}\}\text{PdI}][\text{BAR}_4^{\text{F}}]$  (12).

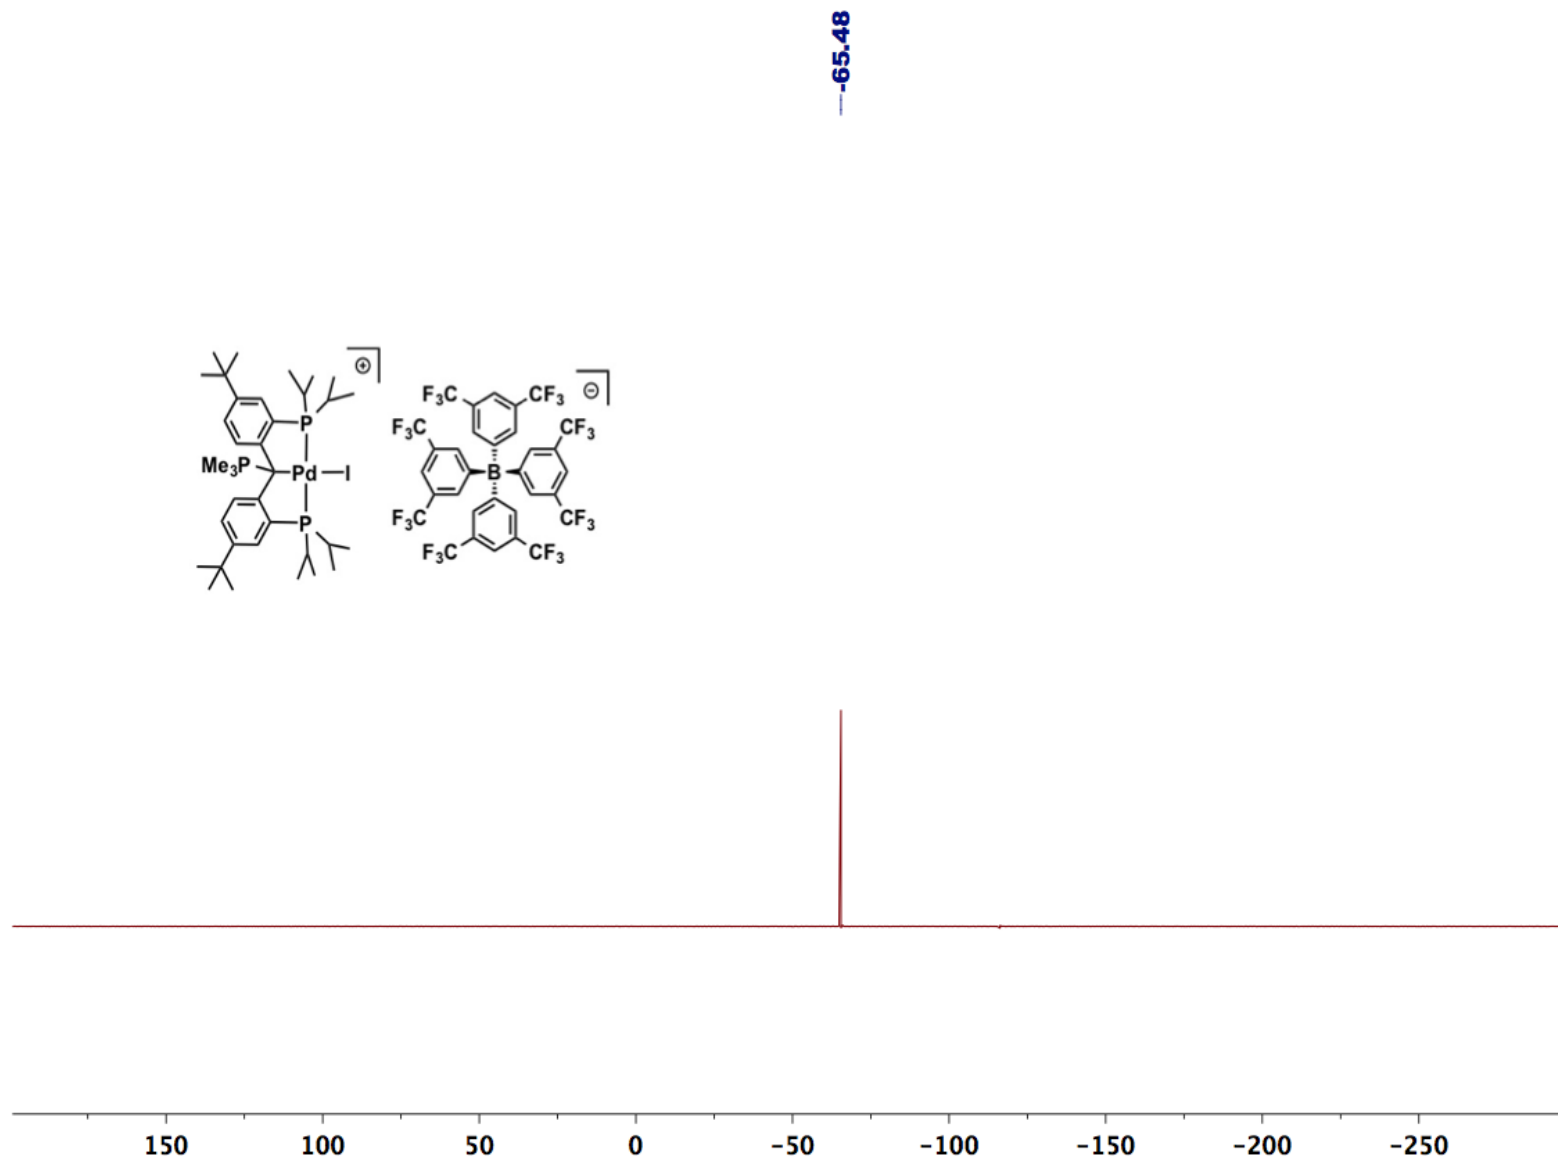

**Figure S38.**  $^{19}\text{F}$  NMR spectrum for  $[\{\text{PC}(\text{sp}^3)(\text{PMe}_3)\text{P}\}^{\text{iBu}}\text{Pd}][\text{BAR}_4^{\text{F}}]$  (12).

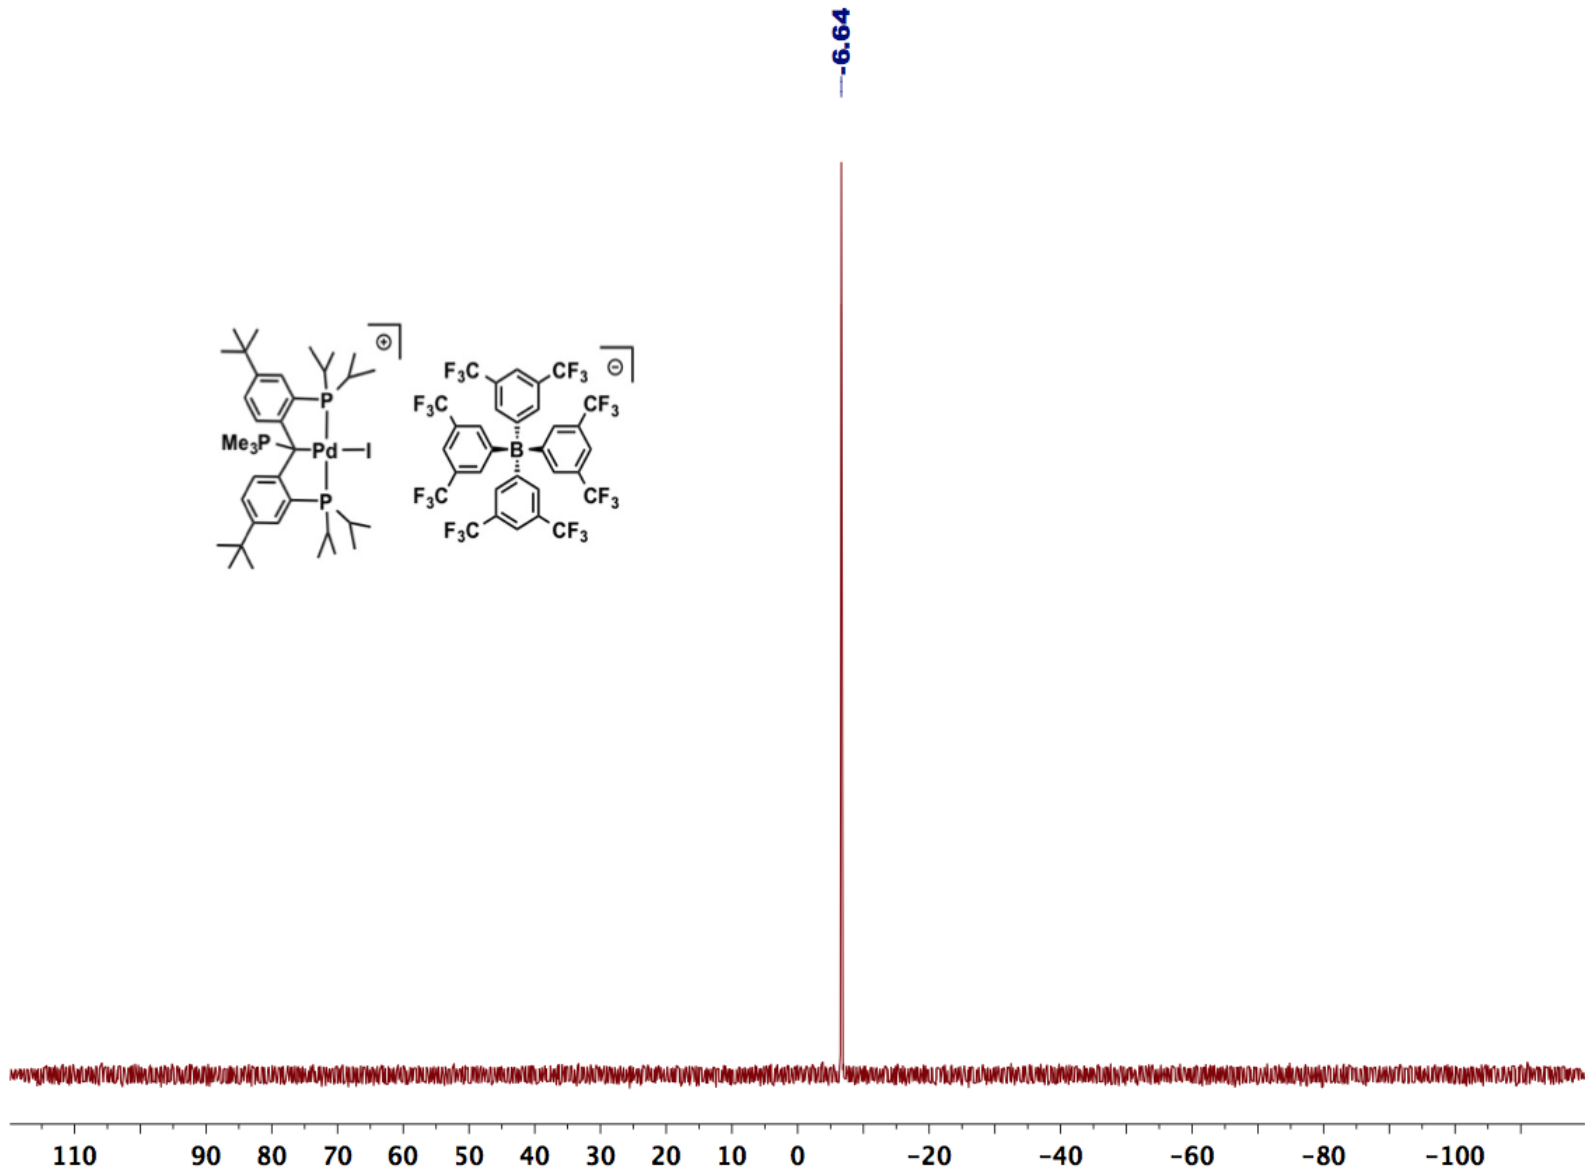

Figure S39.  $^{11}\text{B}$  NMR spectrum for  $[\{\text{PC}(\text{sp}^3)(\text{PMe}_3)\text{P}^{\text{tBu}}\text{PdI}\}][\text{BAr}_4^{\text{F}}]$  (12).



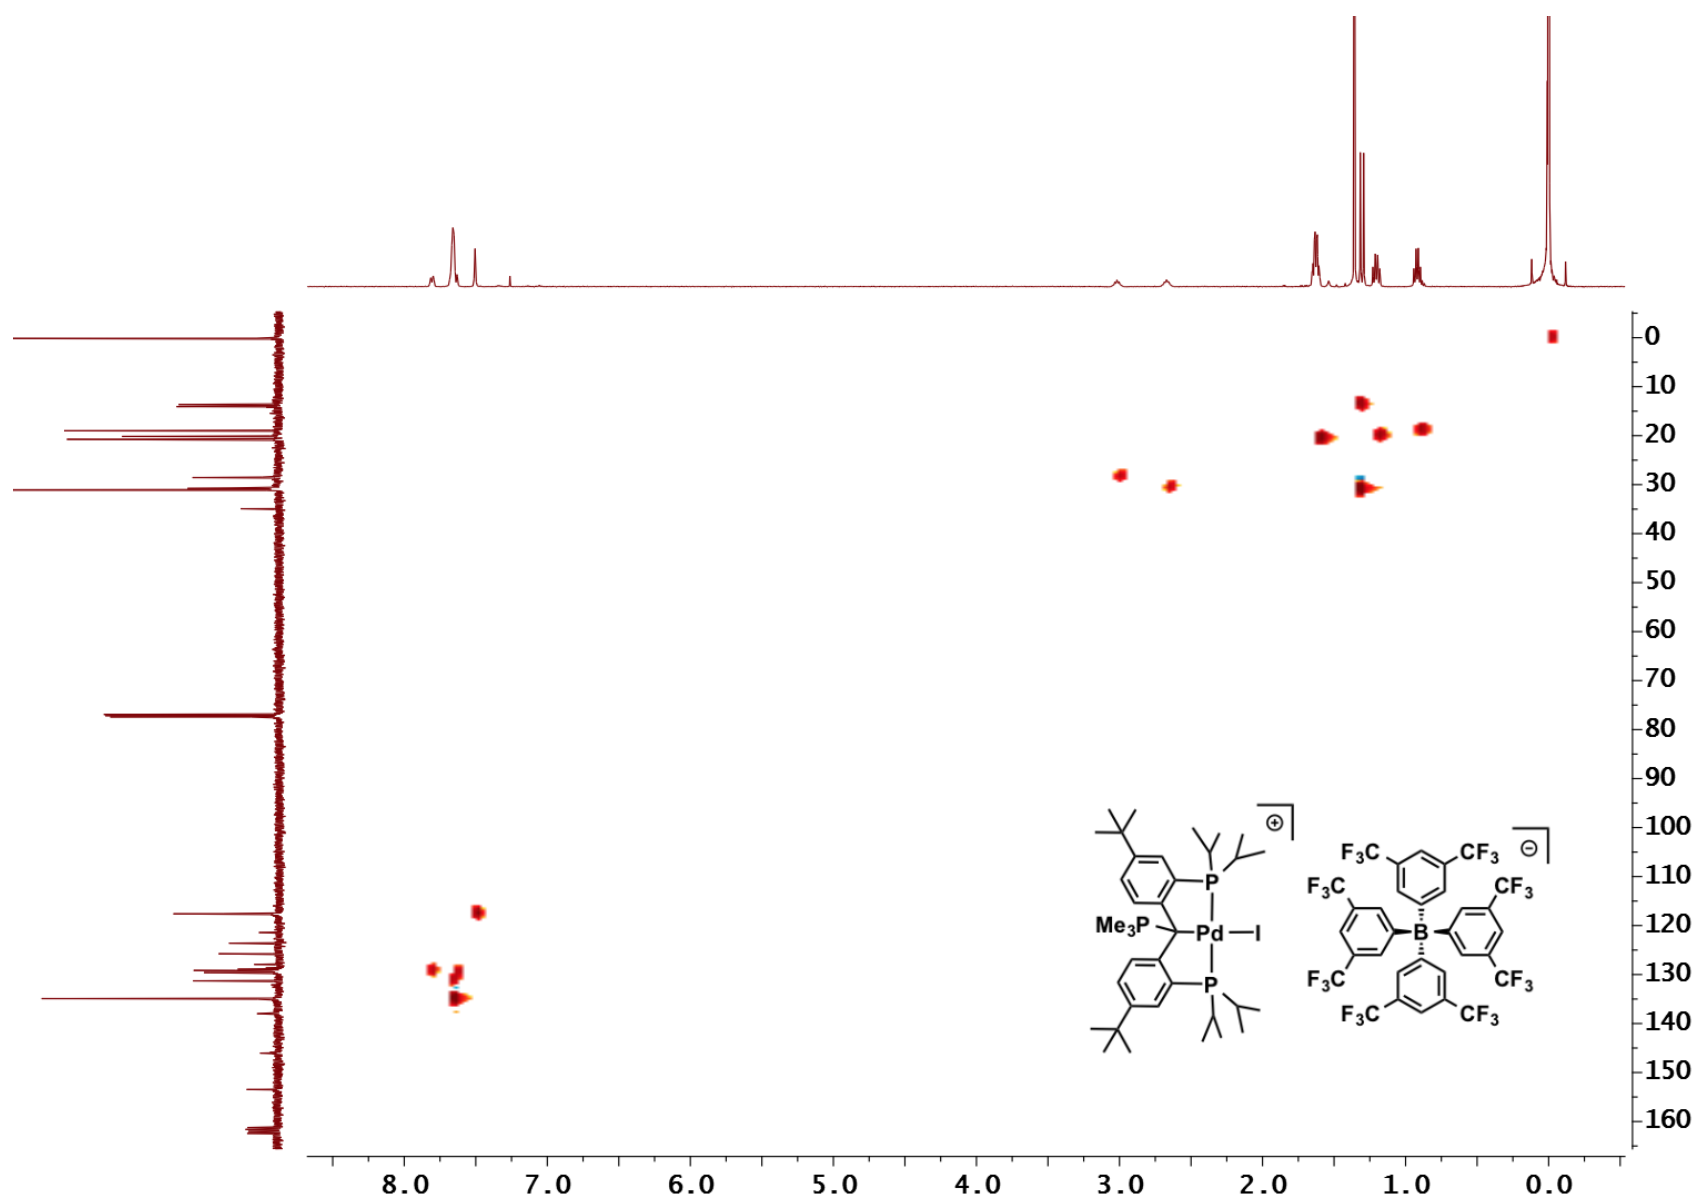

**Figure S40.**  $^1\text{H}$ - $^{13}\text{C}$  HSQC NMR spectrum for  $[(\text{PC}(\text{sp}^3)(\text{PMe}_3)\text{P})^{\text{tBu}}\text{PdI}][\text{BAr}_4^{\text{F}}]$  (12).

#### 4.9 NMR Spectra for the comproportionation reaction between 3 and 5

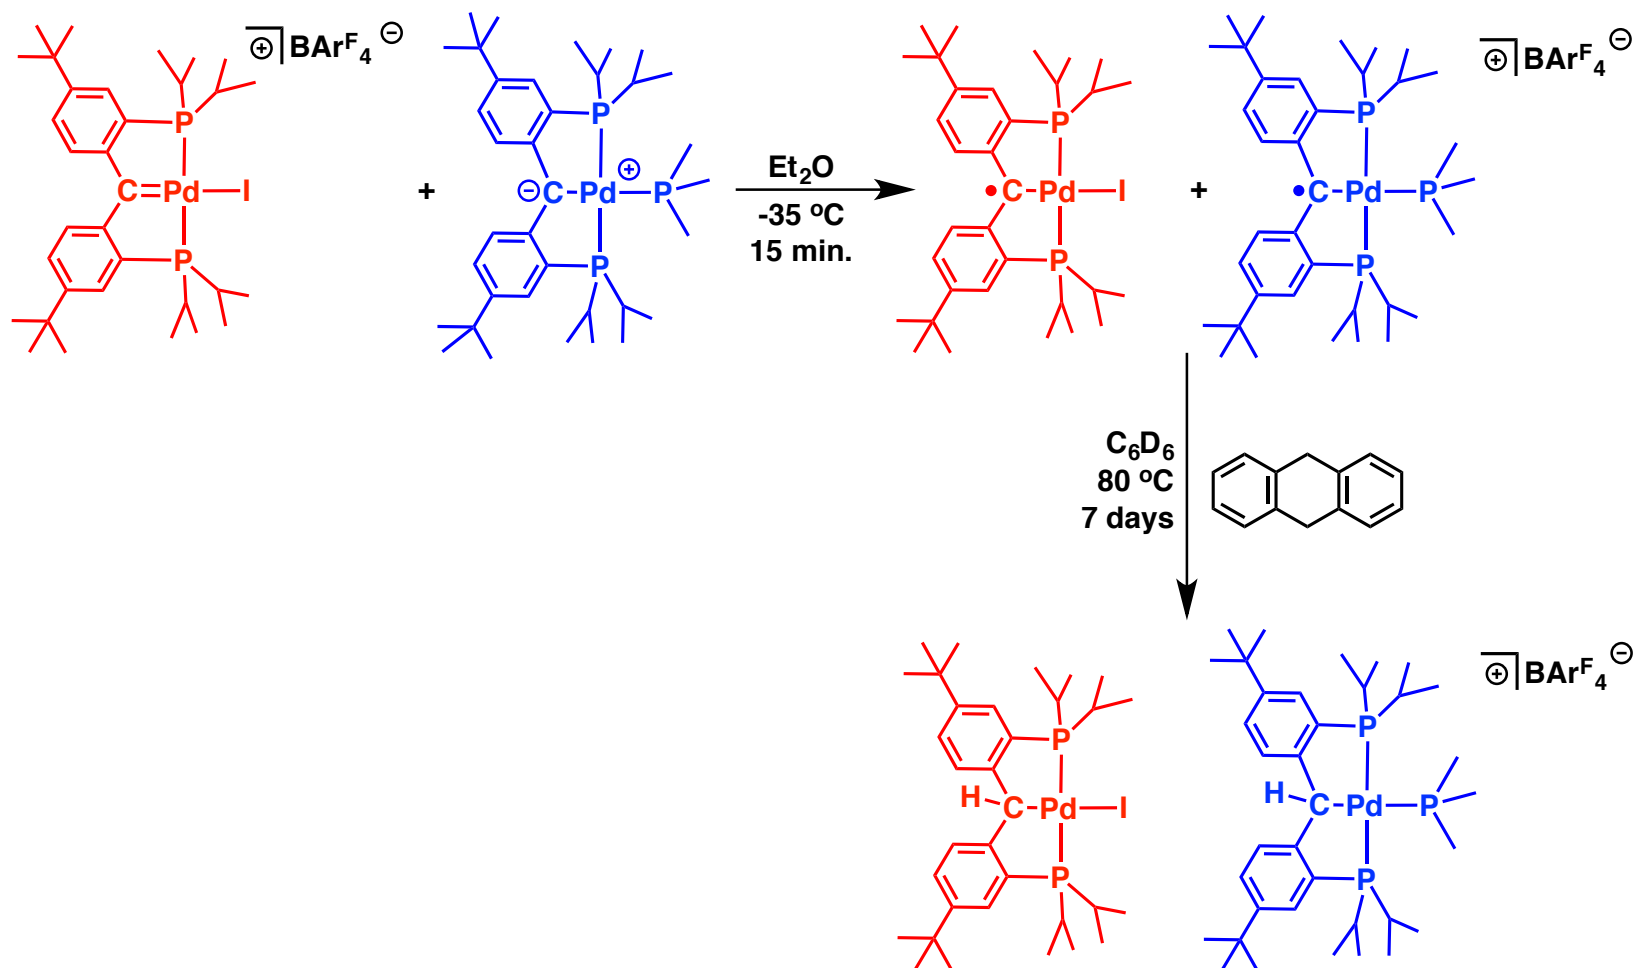

**Figure S41.** Comproportionation reaction between  $[\{\text{PC}(\text{sp}^2)\text{P}\}^{\text{iBu}}\text{Pd}(\text{PMe}_3)]$  (3) and  $[\{\text{PC}(\text{sp}^2)\text{P}\}^{\text{iBu}}\text{PdI}][\text{BAr}_4^{\text{F}}]$  (5).

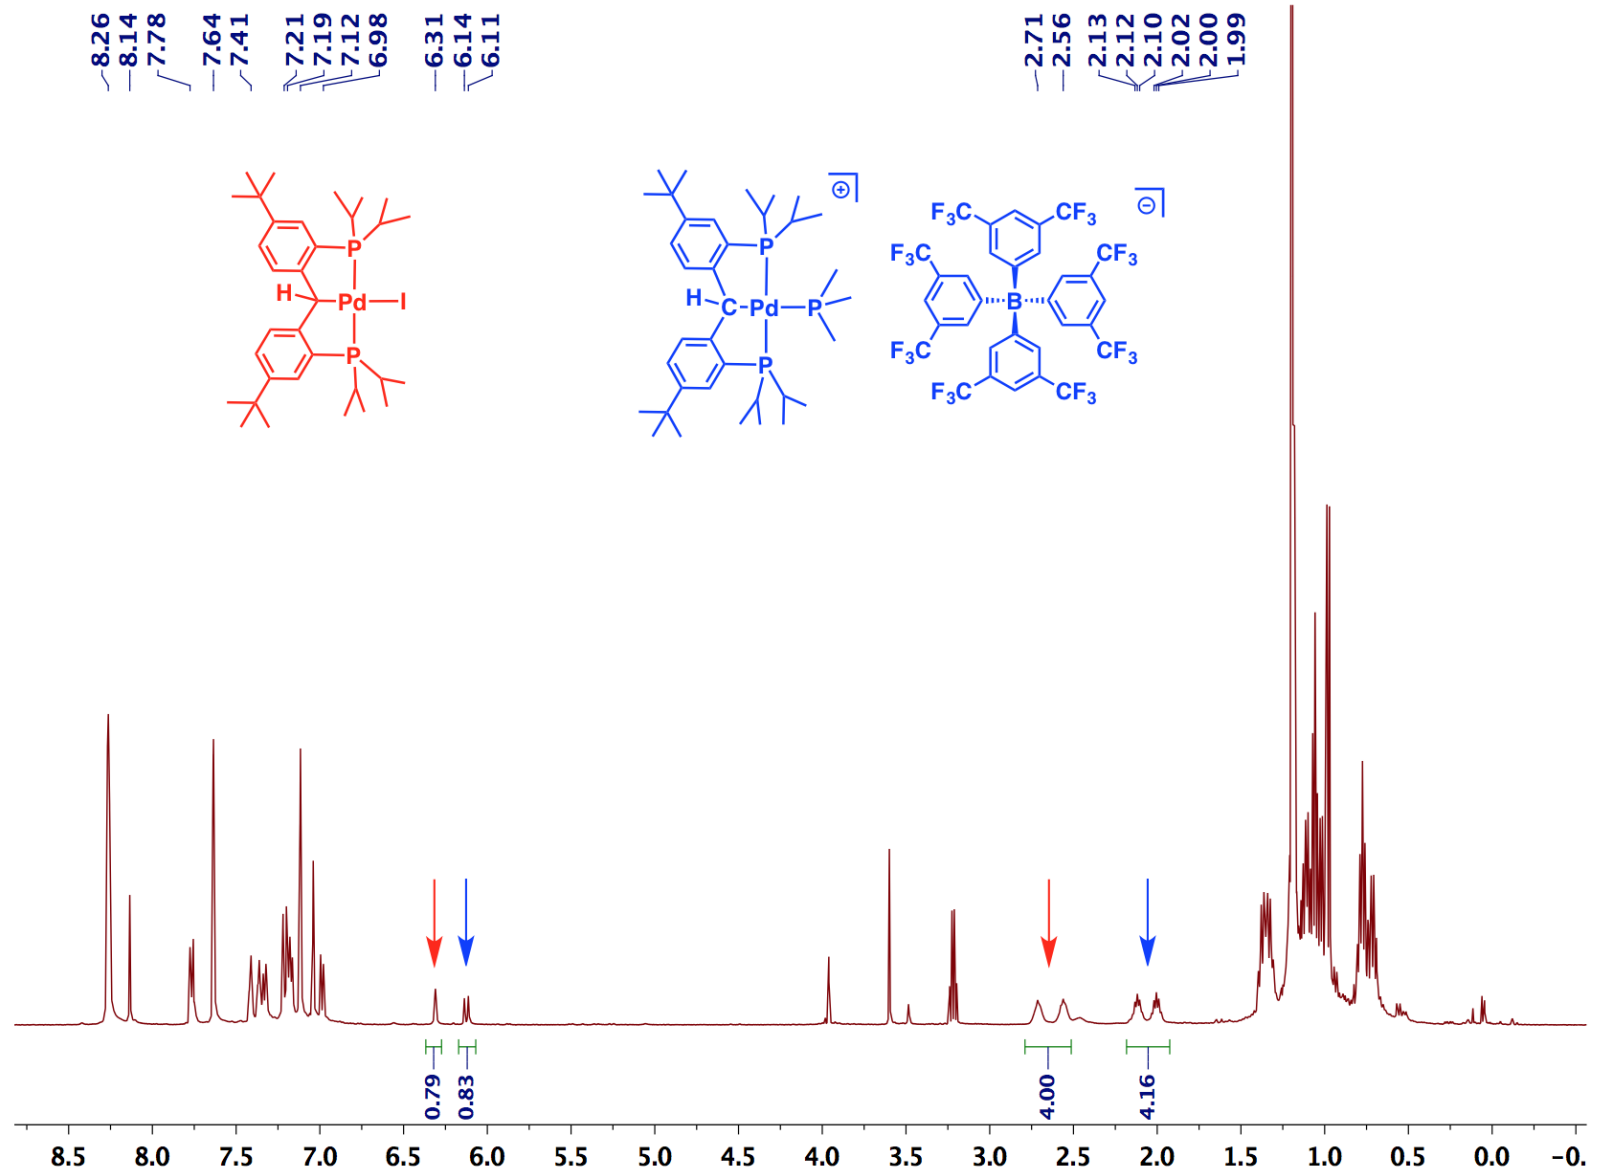

Figure S42. <sup>1</sup>H NMR spectrum for the reaction mixture.

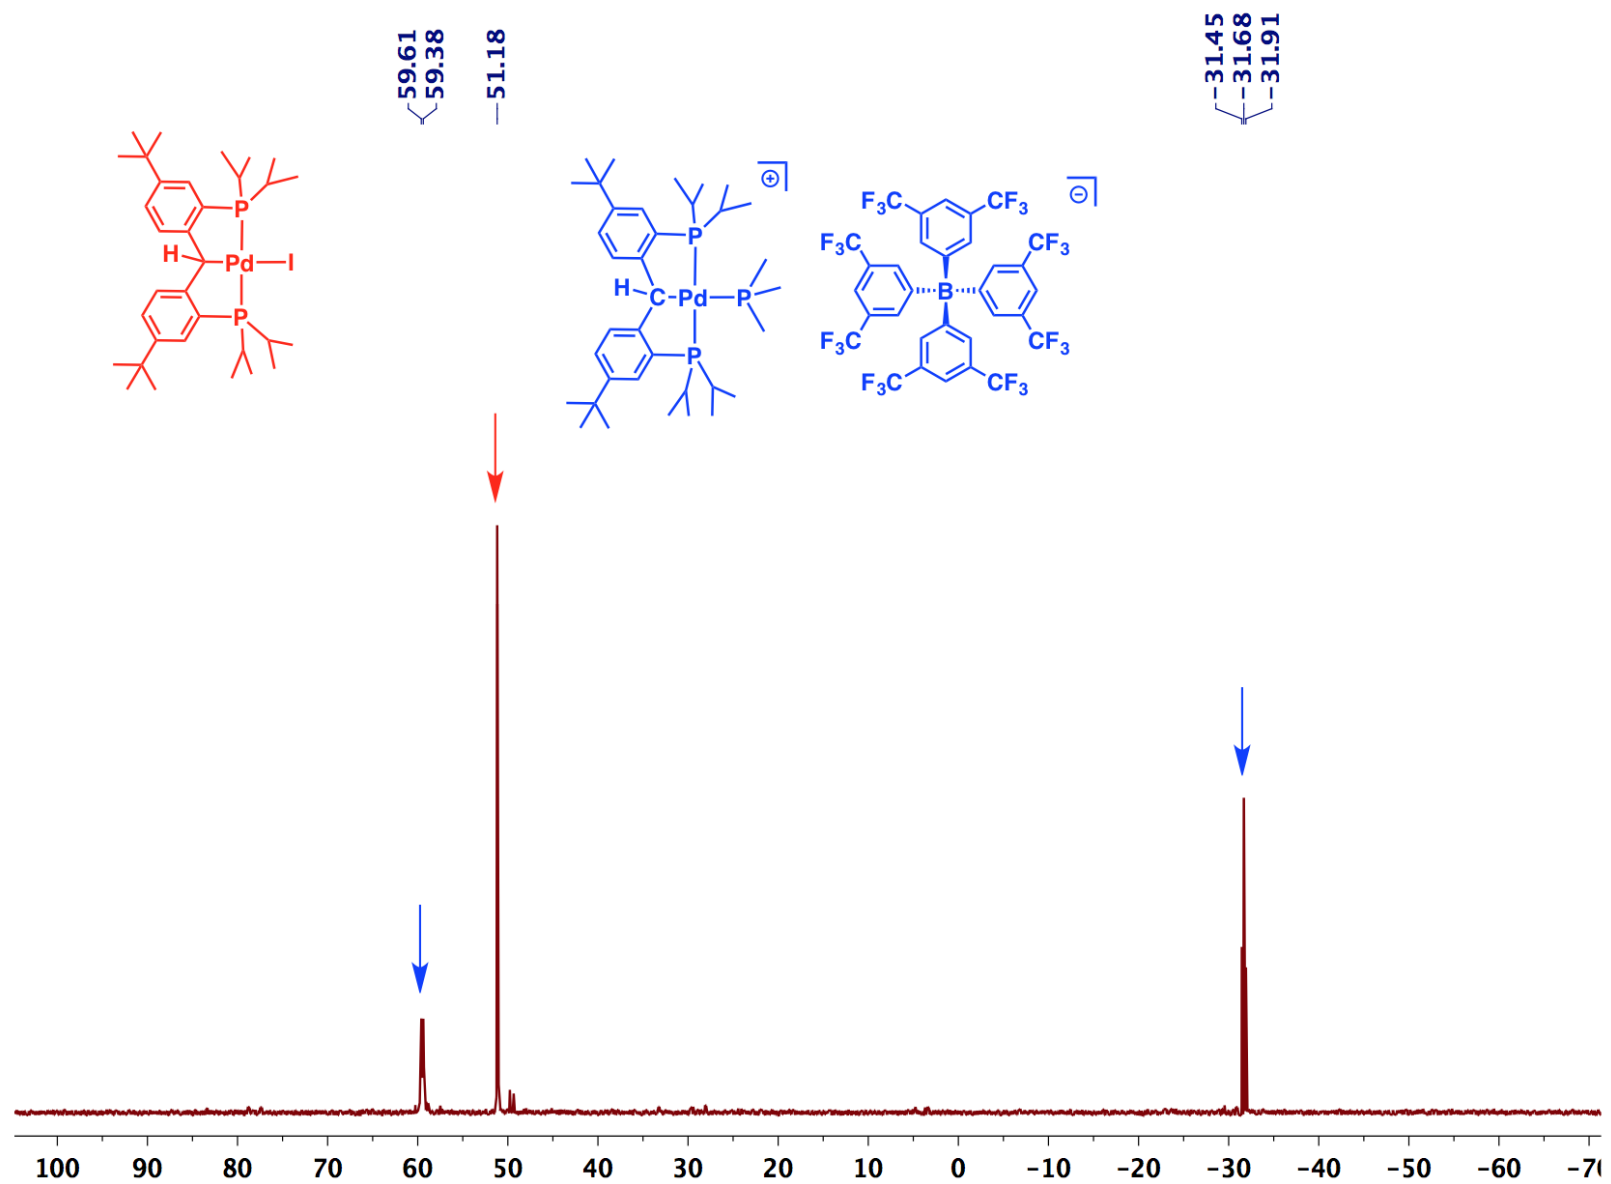

Figure S43.  $^{31}\text{P}\{^1\text{H}\}$  NMR spectrum for the reaction mixture.

## 5 Crystallographic tables

### 5.1 Crystal data for $[\{PC^*(sp^2)P\}^tBuPdI]$ (4)

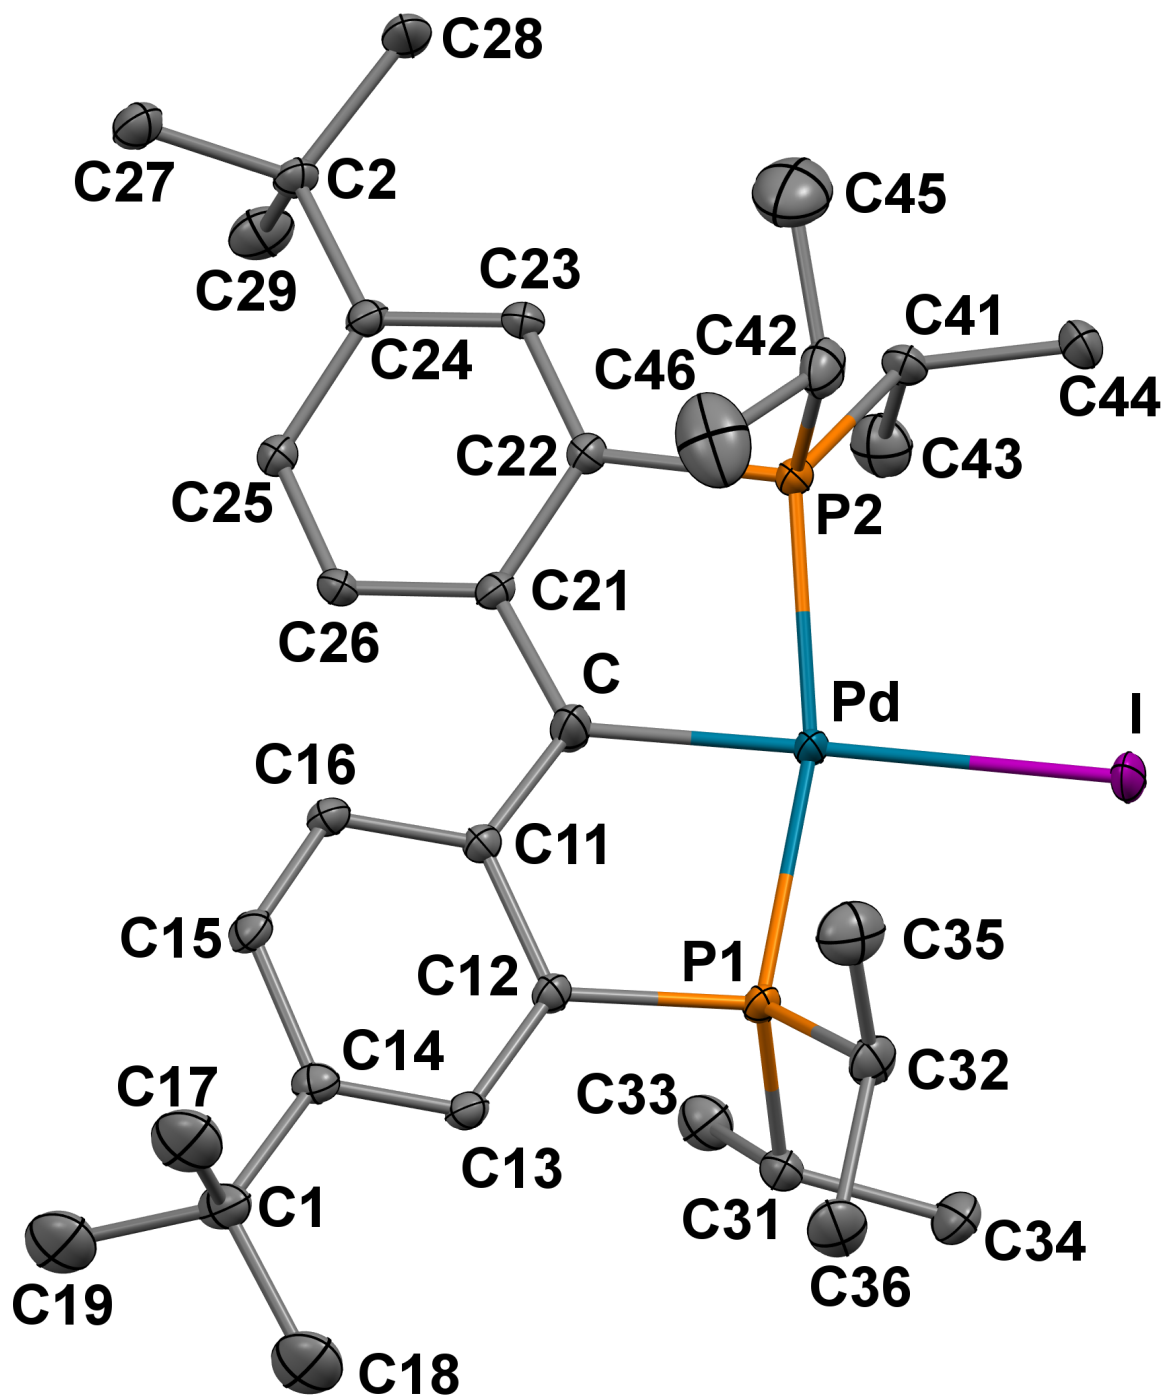

**Table S6.** Crystal data and structure refinement for  $[(\text{PC}^{\bullet}(\text{sp}^2)\text{P})^{\text{tBu}}\text{PdI}]$  (**4**).

|                                          |                                                              |                     |
|------------------------------------------|--------------------------------------------------------------|---------------------|
| Identification code:                     | pc27                                                         |                     |
| Empirical formula:                       | $\text{C}_{33}\text{H}_{52}\text{IP}_2\text{Pd}$             |                     |
| Formula weight:                          | 743.99                                                       |                     |
| Temperature:                             | 120(2) K                                                     |                     |
| Wavelength:                              | 0.71073 Å                                                    |                     |
| Crystal system:                          | Orthorhombic                                                 |                     |
| Space group:                             | <i>Pbca</i>                                                  |                     |
| Unit cell dimensions:                    | $a = 14.978(2)$ Å                                            | $\alpha = 90^\circ$ |
|                                          | $b = 16.438(3)$ Å                                            | $\beta = 90^\circ$  |
|                                          | $c = 29.361(5)$ Å                                            | $\gamma = 90^\circ$ |
| Volume:                                  | 7228.9(19) Å <sup>3</sup>                                    |                     |
| Z:                                       | 8                                                            |                     |
| Density (calculated):                    | 1.367 g·cm <sup>-3</sup>                                     |                     |
| Absorption coefficient ( $\mu$ ):        | 1.474 mm <sup>-1</sup>                                       |                     |
| F(000):                                  | 3032                                                         |                     |
| Crystal size:                            | 0.09 × 0.08 × 0.07 mm <sup>3</sup>                           |                     |
| $\theta$ range for data collection:      | 1.94 to 25.00°                                               |                     |
| Index ranges:                            | $-17 \leq h \leq 17, -19 \leq k \leq 19, -34 \leq l \leq 34$ |                     |
| Reflections collected:                   | 141424                                                       |                     |
| Independent reflections:                 | 6340 [ $R_{\text{int}} = 0.0644$ ]                           |                     |
| Completeness to $\theta = 25.00^\circ$ : | 99.6 %                                                       |                     |
| Absorption correction:                   | Semi-empirical from equivalents                              |                     |
| Max. and min. transmission:              | 0.8265 and 0.5642                                            |                     |
| Refinement method:                       | Full-matrix least-squares on $F^2$                           |                     |
| Data / restraints / parameters:          | 6340 / 0 / 365                                               |                     |
| Goodness-of-fit on $F^2$ :               | 1.079                                                        |                     |
| Final R indices [ $I > 2\sigma(I)$ ]:    | $R_1 = 0.0290, wR_2 = 0.0590$                                |                     |
| R indices (all data):                    | $R_1 = 0.0343, wR_2 = 0.0613$                                |                     |
| Largest diff. peak and hole:             | 0.850 and $-0.569 \text{ e}^- \cdot \text{Å}^{-3}$           |                     |

**Table S7.** Atomic coordinates and equivalent isotropic displacement parameters ( $\text{\AA}^2$ ) for  $[\text{PC}^*(\text{sp}^2)\text{P}]^t\text{BuPdI}$  (**4**).  $U(\text{eq})$  is defined as one third of the trace of the orthogonalized  $U_{ij}$  tensor

| atom   | x            | y            | z           | $U(\text{eq})$ |
|--------|--------------|--------------|-------------|----------------|
| C(1)   | 0.11287(19)  | -0.05689(18) | 0.19631(11) | 0.031(1)       |
| P(1)   | 0.13354(4)   | 0.12092(4)   | 0.35082(2)  | 0.019(1)       |
| C(2)   | -0.42605(17) | 0.24625(17)  | 0.34417(9)  | 0.022(1)       |
| C(11)  | -0.01718(17) | 0.08251(16)  | 0.30507(9)  | 0.019(1)       |
| C(12)  | 0.07690(17)  | 0.07758(16)  | 0.30183(9)  | 0.018(1)       |
| C(13)  | 0.11786(17)  | 0.03660(16)  | 0.26608(9)  | 0.019(1)       |
| C(14)  | 0.06934(17)  | -0.00712(16) | 0.23405(9)  | 0.021(1)       |
| C(15)  | -0.02377(17) | -0.00616(16) | 0.23897(9)  | 0.022(1)       |
| C(16)  | -0.06564(17) | 0.03778(16)  | 0.27243(9)  | 0.021(1)       |
| C(17)  | 0.0853(4)    | -0.1431(3)   | 0.1999(2)   | 0.053(1)       |
| C(18)  | 0.2116(3)    | -0.0496(3)   | 0.19480(18) | 0.053(1)       |
| C(19)  | 0.0781(3)    | -0.0234(3)   | 0.14889(17) | 0.053(1)       |
| C(69)  | 0.0576(10)   | -0.1287(8)   | 0.1797(5)   | 0.033(2)       |
| C(68)  | 0.1572(9)    | -0.0105(8)   | 0.1623(4)   | 0.033(2)       |
| C(67)  | 0.1978(9)    | -0.1081(8)   | 0.2238(4)   | 0.033(2)       |
| C(21)  | -0.15060(17) | 0.15460(17)  | 0.34044(9)  | 0.020(1)       |
| C(22)  | -0.19448(17) | 0.16857(16)  | 0.38192(9)  | 0.019(1)       |
| C(23)  | -0.28267(17) | 0.19512(16)  | 0.38337(9)  | 0.020(1)       |
| C(24)  | -0.33077(17) | 0.21149(16)  | 0.34389(9)  | 0.019(1)       |
| C(25)  | -0.28633(17) | 0.19924(16)  | 0.30290(9)  | 0.020(1)       |
| C(26)  | -0.19960(17) | 0.17122(16)  | 0.30086(9)  | 0.021(1)       |
| C(27)  | -0.48712(19) | 0.1942(2)    | 0.31416(11) | 0.032(1)       |
| I(1)   | 0.1193(2)    | 0.1891(7)    | 0.46881(15) | 0.049(1)       |
| C(28)  | -0.46523(19) | 0.2508(2)    | 0.39153(10) | 0.037(1)       |
| C(29)  | -0.4241(2)   | 0.33273(19)  | 0.32400(12) | 0.037(1)       |
| C(31)  | 0.20662(18)  | 0.20190(17)  | 0.32910(9)  | 0.024(1)       |
| C(32)  | 0.20704(19)  | 0.04128(18)  | 0.37421(10) | 0.028(1)       |
| C(33)  | 0.1493(2)    | 0.27262(18)  | 0.31354(11) | 0.032(1)       |
| C(34)  | 0.2744(2)    | 0.2305(2)    | 0.36467(11) | 0.034(1)       |
| C(35)  | 0.1512(2)    | -0.0309(2)   | 0.38978(12) | 0.042(1)       |
| C(36)  | 0.2841(2)    | 0.0139(2)    | 0.34324(11) | 0.039(1)       |
| C(41)  | -0.15972(19) | 0.23486(18)  | 0.47083(9)  | 0.025(1)       |
| C(42)  | -0.1499(2)   | 0.05715(19)  | 0.45769(11) | 0.032(1)       |
| C(43)  | -0.1418(2)   | 0.31815(19)  | 0.45010(12) | 0.039(1)       |
| C(44)  | -0.1186(2)   | 0.2265(2)    | 0.51805(10) | 0.034(1)       |
| C(45)  | -0.2437(3)   | 0.0512(3)    | 0.47499(15) | 0.063(1)       |
| C(46)  | -0.1331(3)   | -0.0119(2)   | 0.42341(14) | 0.064(1)       |
| C      | -0.05707(19) | 0.1291(2)    | 0.34130(10) | 0.032(1)       |
| Pd     | 0.01629(1)   | 0.15179(1)   | 0.39769(1)  | 0.020(1)       |
| I      | 0.1176(3)    | 0.1694(3)    | 0.47206(16) | 0.031(1)       |
| P(2)   | -0.12201(4)  | 0.15570(4)   | 0.43112(2)  | 0.019(1)       |
| H(13)  | 0.1810       | 0.0386       | 0.2635      | 0.023          |
| H(15)  | -0.0591      | -0.0370      | 0.2184      | 0.026          |
| H(16)  | -0.1290      | 0.0381       | 0.2736      | 0.025          |
| H(17A) | 0.0205       | -0.1472      | 0.1957      | 0.079          |
| H(17B) | 0.1014       | -0.1641      | 0.2300      | 0.079          |
| H(17C) | 0.1157       | -0.1751      | 0.1763      | 0.079          |
| H(18A) | 0.2350       | -0.0826      | 0.1697      | 0.079          |
| H(18B) | 0.2369       | -0.0689      | 0.2236      | 0.079          |

Continued on next page

**Table S7.** – continued from previous page

| atom   | x       | y       | x      | U(eq) |
|--------|---------|---------|--------|-------|
| H(18C) | 0.2282  | 0.0075  | 0.1901 | 0.079 |
| H(19A) | 0.0932  | 0.0344  | 0.1462 | 0.079 |
| H(19B) | 0.0132  | -0.0301 | 0.1471 | 0.079 |
| H(19C) | 0.1065  | -0.0538 | 0.1241 | 0.079 |
| H(69A) | 0.0115  | -0.1093 | 0.1587 | 0.049 |
| H(69B) | 0.0292  | -0.1553 | 0.2058 | 0.049 |
| H(69C) | 0.0964  | -0.1676 | 0.1641 | 0.049 |
| H(68A) | 0.1976  | 0.0285  | 0.1768 | 0.039 |
| H(68B) | 0.1129  | 0.0189  | 0.1440 | 0.039 |
| H(68C) | 0.1916  | -0.0469 | 0.1425 | 0.039 |
| H(67A) | 0.2291  | -0.1431 | 0.2020 | 0.049 |
| H(67B) | 0.1726  | -0.1416 | 0.2483 | 0.049 |
| H(67C) | 0.2398  | -0.0688 | 0.2368 | 0.049 |
| H(23)  | -0.3108 | 0.2022  | 0.4121 | 0.024 |
| H(25)  | -0.3168 | 0.2106  | 0.2752 | 0.024 |
| H(26)  | -0.1725 | 0.1630  | 0.2720 | 0.025 |
| H(27A) | -0.4618 | 0.1903  | 0.2835 | 0.047 |
| H(27B) | -0.5464 | 0.2193  | 0.3125 | 0.047 |
| H(27C) | -0.4923 | 0.1396  | 0.3273 | 0.047 |
| H(28A) | -0.5253 | 0.2743  | 0.3900 | 0.055 |
| H(28B) | -0.4272 | 0.2851  | 0.4108 | 0.055 |
| H(28C) | -0.4686 | 0.1960  | 0.4046 | 0.055 |
| H(29A) | -0.4002 | 0.3307  | 0.2930 | 0.056 |
| H(29B) | -0.3860 | 0.3676  | 0.3429 | 0.056 |
| H(29C) | -0.4848 | 0.3549  | 0.3234 | 0.056 |
| H(31)  | 0.2400  | 0.1804  | 0.3022 | 0.028 |
| H(32)  | 0.2351  | 0.0647  | 0.4022 | 0.033 |
| H(33A) | 0.1869  | 0.3132  | 0.2984 | 0.049 |
| H(33B) | 0.1200  | 0.2974  | 0.3400 | 0.049 |
| H(33C) | 0.1039  | 0.2530  | 0.2922 | 0.049 |
| H(34A) | 0.3154  | 0.1859  | 0.3719 | 0.051 |
| H(34B) | 0.2428  | 0.2474  | 0.3923 | 0.051 |
| H(34C) | 0.3083  | 0.2767  | 0.3525 | 0.051 |
| H(35A) | 0.1210  | -0.0550 | 0.3635 | 0.063 |
| H(35B) | 0.1066  | -0.0125 | 0.4119 | 0.063 |
| H(35C) | 0.1901  | -0.0716 | 0.4040 | 0.063 |
| H(36A) | 0.2603  | -0.0186 | 0.3180 | 0.058 |
| H(36B) | 0.3263  | -0.0190 | 0.3609 | 0.058 |
| H(36C) | 0.3148  | 0.0618  | 0.3310 | 0.058 |
| H(41)  | -0.2258 | 0.2291  | 0.4742 | 0.030 |
| H(42)  | -0.1087 | 0.0489  | 0.4841 | 0.039 |
| H(43A) | -0.0774 | 0.3251  | 0.4455 | 0.059 |
| H(43B) | -0.1639 | 0.3605  | 0.4707 | 0.059 |
| H(43C) | -0.1725 | 0.3224  | 0.4207 | 0.059 |
| H(44A) | -0.1336 | 0.1730  | 0.5307 | 0.052 |
| H(44B) | -0.1422 | 0.2692  | 0.5380 | 0.052 |
| H(44C) | -0.0536 | 0.2318  | 0.5158 | 0.052 |
| H(45A) | -0.2855 | 0.0564  | 0.4495 | 0.094 |
| H(45B) | -0.2547 | 0.0949  | 0.4970 | 0.094 |
| H(45C) | -0.2524 | -0.0016 | 0.4899 | 0.094 |
| H(46A) | -0.1757 | -0.0075 | 0.3982 | 0.096 |

Continued on next page



**Table S7.** – continued from previous page

| <b>atom</b> | <b>x</b> | <b>y</b> | <b>z</b> | <b>U(eq)</b> |
|-------------|----------|----------|----------|--------------|
| H(46B)      | -0.1407  | -0.0645  | 0.4386   | 0.096        |
| H(46C)      | -0.0721  | -0.0077  | 0.4115   | 0.096        |

**Table S8.** Anisotropic displacement parameters ( $\text{\AA}^2$ ) for  $[\{\text{PC}^*(\text{sp}^2)\text{P}\}^{\text{tBu}}\text{PdI}]$  (**4**). The anisotropic displacement factor exponent takes the form:  $-2\pi^2[h^2a^*{}^2U_{11} + \dots + 2hka^*b^*U_{12}]$ .

| atom  | $U_{11}$   | $U_{22}$   | $U_{33}$   | $U_{23}$    | $U_{13}$    | $U_{12}$    |
|-------|------------|------------|------------|-------------|-------------|-------------|
| C(1)  | 0.0233(15) | 0.0333(17) | 0.0352(17) | -0.0179(14) | 0.0056(13)  | -0.0040(13) |
| P(1)  | 0.0125(3)  | 0.0275(4)  | 0.0177(3)  | -0.0040(3)  | -0.0018(3)  | 0.0037(3)   |
| C(2)  | 0.0135(13) | 0.0279(15) | 0.0234(15) | -0.0051(12) | 0.0007(11)  | 0.0041(11)  |
| C(11) | 0.0153(13) | 0.0242(14) | 0.0159(13) | -0.0001(11) | -0.0003(11) | 0.0022(11)  |
| C(12) | 0.0145(13) | 0.0218(14) | 0.0175(13) | -0.0008(11) | -0.0019(11) | 0.0027(11)  |
| C(13) | 0.0132(13) | 0.0217(14) | 0.0224(14) | -0.0012(11) | 0.0012(11)  | 0.0000(11)  |
| C(14) | 0.0185(14) | 0.0189(14) | 0.0240(14) | -0.0008(11) | 0.0021(11)  | -0.0012(11) |
| C(15) | 0.0165(14) | 0.0228(14) | 0.0261(15) | -0.0043(12) | -0.0024(11) | -0.0032(11) |
| C(16) | 0.0137(13) | 0.0270(15) | 0.0209(14) | 0.0008(12)  | 0.0009(11)  | 0.0016(11)  |
| C(17) | 0.0452(18) | 0.061(2)   | 0.053(2)   | -0.0274(16) | 0.0105(15)  | 0.0088(15)  |
| C(18) | 0.0452(18) | 0.061(2)   | 0.053(2)   | -0.0274(16) | 0.0105(15)  | 0.0088(15)  |
| C(19) | 0.0452(18) | 0.061(2)   | 0.053(2)   | -0.0274(16) | 0.0105(15)  | 0.0088(15)  |
| C(69) | 0.035(5)   | 0.031(4)   | 0.032(5)   | -0.021(3)   | 0.004(3)    | 0.000(3)    |
| C(68) | 0.035(5)   | 0.031(4)   | 0.032(5)   | -0.021(3)   | 0.004(3)    | 0.000(3)    |
| C(67) | 0.035(5)   | 0.031(4)   | 0.032(5)   | -0.021(3)   | 0.004(3)    | 0.000(3)    |
| C(21) | 0.0124(13) | 0.0261(14) | 0.0208(14) | -0.0036(12) | -0.0004(11) | -0.0012(11) |
| C(22) | 0.0159(13) | 0.0241(15) | 0.0170(13) | 0.0003(11)  | -0.0005(11) | 0.0000(11)  |
| C(23) | 0.0154(13) | 0.0277(15) | 0.0169(13) | -0.0018(11) | 0.0028(11)  | 0.0003(11)  |
| C(24) | 0.0128(13) | 0.0222(14) | 0.0218(14) | -0.0021(11) | 0.0007(11)  | -0.0003(11) |
| C(25) | 0.0163(13) | 0.0262(15) | 0.0183(14) | -0.0013(11) | -0.0013(11) | 0.0005(11)  |
| C(26) | 0.0165(13) | 0.0290(16) | 0.0163(13) | -0.0047(11) | 0.0033(11)  | -0.0006(11) |
| C(27) | 0.0179(15) | 0.0438(19) | 0.0329(17) | -0.0095(14) | -0.0009(13) | 0.0031(13)  |
| I(1)  | 0.0179(3)  | 0.102(2)   | 0.0263(8)  | -0.0262(10) | -0.0040(4)  | -0.0008(9)  |
| C(28) | 0.0161(15) | 0.067(2)   | 0.0268(17) | -0.0076(16) | 0.0005(12)  | 0.0112(15)  |
| C(29) | 0.0252(16) | 0.0384(19) | 0.048(2)   | -0.0011(15) | 0.0018(15)  | 0.0098(14)  |
| C(31) | 0.0193(14) | 0.0314(16) | 0.0201(14) | -0.0046(12) | 0.0011(11)  | 0.0003(12)  |
| C(32) | 0.0208(15) | 0.0348(17) | 0.0272(16) | 0.0005(13)  | -0.0047(12) | 0.0097(13)  |
| C(33) | 0.0360(18) | 0.0293(17) | 0.0319(17) | -0.0049(13) | 0.0019(14)  | 0.0025(14)  |
| C(34) | 0.0258(16) | 0.044(2)   | 0.0331(17) | -0.0067(15) | -0.0013(13) | -0.0090(14) |
| C(35) | 0.0387(19) | 0.0377(19) | 0.050(2)   | 0.0102(16)  | -0.0009(16) | 0.0071(15)  |
| C(36) | 0.0296(17) | 0.049(2)   | 0.0379(19) | -0.0041(16) | -0.0012(14) | 0.0204(15)  |
| C(41) | 0.0197(14) | 0.0366(17) | 0.0198(15) | -0.0067(13) | 0.0031(11)  | 0.0033(12)  |
| C(42) | 0.0322(17) | 0.0370(18) | 0.0279(16) | 0.0078(14)  | -0.0095(14) | -0.0024(14) |
| C(43) | 0.045(2)   | 0.0345(18) | 0.0387(19) | -0.0090(15) | 0.0024(16)  | 0.0042(15)  |
| C(44) | 0.0271(16) | 0.058(2)   | 0.0184(15) | -0.0086(14) | 0.0000(13)  | 0.0020(15)  |
| C(45) | 0.058(3)   | 0.065(3)   | 0.064(3)   | 0.016(2)    | 0.003(2)    | -0.015(2)   |
| C(46) | 0.100(4)   | 0.033(2)   | 0.058(3)   | 0.0022(19)  | -0.009(2)   | -0.007(2)   |
| C     | 0.0184(15) | 0.055(2)   | 0.0218(15) | -0.0105(14) | -0.0038(12) | 0.0079(14)  |
| Pd    | 0.0121(1)  | 0.0323(1)  | 0.0142(1)  | -0.0038(1)  | -0.0013(1)  | 0.0036(1)   |
| I     | 0.0210(7)  | 0.0543(15) | 0.0162(6)  | -0.0027(9)  | -0.0066(4)  | 0.0070(7)   |
| P(2)  | 0.0142(3)  | 0.0283(4)  | 0.0155(3)  | -0.0008(3)  | -0.0008(3)  | 0.0019(3)   |

**Table S9.** Distances [Å] for  $[\{PC^{\bullet}(sp^2)P\}^tBuPdI]$  (**4**).

| atom – atom    | distance  | atom – atom    | distance  |
|----------------|-----------|----------------|-----------|
| C(1) – C(68)   | 1.421(14) | C(1) – C(17)   | 1.480(6)  |
| C(1) – C(18)   | 1.485(6)  | C(1) – C(69)   | 1.522(14) |
| C(1) – C(14)   | 1.524(4)  | C(1) – C(19)   | 1.585(6)  |
| C(1) – C(67)   | 1.726(14) | P(1) – C(12)   | 1.816(3)  |
| P(1) – C(31)   | 1.838(3)  | P(1) – C(32)   | 1.843(3)  |
| P(1) – Pd      | 2.2880(7) | C(2) – C(28)   | 1.511(4)  |
| C(2) – C(27)   | 1.532(4)  | C(2) – C(24)   | 1.537(4)  |
| C(2) – C(29)   | 1.540(4)  | C(11) – C(16)  | 1.409(4)  |
| C(11) – C(12)  | 1.415(4)  | C(11) – C      | 1.441(4)  |
| C(12) – C(13)  | 1.390(4)  | C(13) – C(14)  | 1.389(4)  |
| C(13) – H(13)  | 0.9500    | C(14) – C(15)  | 1.402(4)  |
| C(15) – C(16)  | 1.371(4)  | C(15) – H(15)  | 0.9500    |
| C(16) – H(16)  | 0.9500    | C(17) – H(17A) | 0.9800    |
| C(17) – H(17B) | 0.9800    | C(17) – H(17C) | 0.9800    |
| C(18) – H(18A) | 0.9800    | C(18) – H(18B) | 0.9800    |
| C(18) – H(18C) | 0.9800    | C(19) – H(19A) | 0.9800    |
| C(19) – H(19B) | 0.9800    | C(19) – H(19C) | 0.9800    |
| C(69) – H(69A) | 0.9800    | C(69) – H(69B) | 0.9800    |
| C(69) – H(69C) | 0.9800    | C(68) – H(68A) | 0.9800    |
| C(68) – H(68B) | 0.9800    | C(68) – H(68C) | 0.9800    |
| C(67) – H(67A) | 0.9800    | C(67) – H(67B) | 0.9800    |
| C(67) – H(67C) | 0.9800    | C(21) – C(26)  | 1.401(4)  |
| C(21) – C(22)  | 1.403(4)  | C(21) – C      | 1.462(4)  |
| C(22) – C(23)  | 1.392(4)  | C(22) – P(2)   | 1.819(3)  |
| C(23) – C(24)  | 1.391(4)  | C(23) – H(23)  | 0.9500    |
| C(24) – C(25)  | 1.390(4)  | C(25) – C(26)  | 1.380(4)  |
| C(25) – H(25)  | 0.9500    | C(26) – H(26)  | 0.9500    |
| C(27) – H(27A) | 0.9800    | C(27) – H(27B) | 0.9800    |
| C(27) – H(27C) | 0.9800    | I(1) – Pd      | 2.668(3)  |
| C(28) – H(28A) | 0.9800    | C(28) – H(28B) | 0.9800    |
| C(28) – H(28C) | 0.9800    | C(29) – H(29A) | 0.9800    |
| C(29) – H(29B) | 0.9800    | C(29) – H(29C) | 0.9800    |
| C(31) – C(33)  | 1.516(4)  | C(31) – C(34)  | 1.530(4)  |
| C(31) – H(31)  | 1.0000    | C(32) – C(35)  | 1.521(4)  |
| C(32) – C(36)  | 1.537(4)  | C(32) – H(32)  | 1.0000    |
| C(33) – H(33A) | 0.9800    | C(33) – H(33B) | 0.9800    |
| C(33) – H(33C) | 0.9800    | C(34) – H(34A) | 0.9800    |
| C(34) – H(34B) | 0.9800    | C(34) – H(34C) | 0.9800    |
| C(35) – H(35A) | 0.9800    | C(35) – H(35B) | 0.9800    |
| C(35) – H(35C) | 0.9800    | C(36) – H(36A) | 0.9800    |
| C(36) – H(36B) | 0.9800    | C(36) – H(36C) | 0.9800    |
| C(41) – C(43)  | 1.522(4)  | C(41) – C(44)  | 1.523(4)  |
| C(41) – P(2)   | 1.836(3)  | C(41) – H(41)  | 1.0000    |
| C(42) – C(45)  | 1.497(5)  | C(42) – C(46)  | 1.538(5)  |
| C(42) – P(2)   | 1.846(3)  | C(42) – H(42)  | 1.0000    |
| C(43) – H(43A) | 0.9800    | C(43) – H(43B) | 0.9800    |
| C(43) – H(43C) | 0.9800    | C(44) – H(44A) | 0.9800    |
| C(44) – H(44B) | 0.9800    | C(44) – H(44C) | 0.9800    |
| C(45) – H(45A) | 0.9800    | C(45) – H(45B) | 0.9800    |
| C(45) – H(45C) | 0.9800    | C(46) – H(46A) | 0.9800    |

Continued on next page

**Table S9.** – continued from previous page

| <b>atom – atom</b> | <b>distance</b> | <b>atom – atom</b> | <b>distance</b> |
|--------------------|-----------------|--------------------|-----------------|
| C(46) – H(46B)     | 0.9800          | C(46) – H(46C)     | 0.9800          |
| C – Pd             | 2.022(3)        | Pd – P(2)          | 2.2931(8)       |
| Pd – I             | 2.675(5)        |                    |                 |

**Table S10.** Angles [°] for  $[\{\text{PC}^*(\text{sp}^2)\text{P}\}^t\text{BuPdI}]$  (4).

| atom – atom – atom      | angle      | atom – atom – atom      | angle      |
|-------------------------|------------|-------------------------|------------|
| C(68) – C(1) – C(17)    | 134.0(5)   | C(68) – C(1) – C(18)    | 58.0(6)    |
| C(17) – C(1) – C(18)    | 110.9(4)   | C(68) – C(1) – C(69)    | 116.5(8)   |
| C(18) – C(1) – C(69)    | 126.5(6)   | C(68) – C(1) – C(14)    | 115.0(5)   |
| C(17) – C(1) – C(14)    | 110.1(3)   | C(18) – C(1) – C(14)    | 113.9(3)   |
| C(69) – C(1) – C(14)    | 114.6(6)   | C(68) – C(1) – C(19)    | 49.4(6)    |
| C(17) – C(1) – C(19)    | 107.7(4)   | C(18) – C(1) – C(19)    | 105.8(4)   |
| C(69) – C(1) – C(19)    | 79.0(7)    | C(14) – C(1) – C(19)    | 108.2(3)   |
| C(68) – C(1) – C(67)    | 104.3(7)   | C(17) – C(1) – C(67)    | 72.8(5)    |
| C(18) – C(1) – C(67)    | 47.1(5)    | C(69) – C(1) – C(67)    | 99.9(7)    |
| C(14) – C(1) – C(67)    | 103.7(4)   | C(19) – C(1) – C(67)    | 145.3(5)   |
| C(12) – P(1) – C(31)    | 106.72(12) | C(12) – P(1) – C(32)    | 107.19(13) |
| C(31) – P(1) – C(32)    | 106.73(13) | C(12) – P(1) – Pd       | 101.83(9)  |
| C(31) – P(1) – Pd       | 120.35(9)  | C(32) – P(1) – Pd       | 113.07(10) |
| C(28) – C(2) – C(27)    | 109.0(2)   | C(28) – C(2) – C(24)    | 112.6(2)   |
| C(27) – C(2) – C(24)    | 110.1(2)   | C(28) – C(2) – C(29)    | 108.4(3)   |
| C(27) – C(2) – C(29)    | 107.8(2)   | C(24) – C(2) – C(29)    | 108.8(2)   |
| C(16) – C(11) – C(12)   | 115.9(2)   | C(16) – C(11) – C       | 124.5(2)   |
| C(12) – C(11) – C       | 119.6(2)   | C(13) – C(12) – C(11)   | 121.2(2)   |
| C(13) – C(12) – P(1)    | 125.6(2)   | C(11) – C(12) – P(1)    | 112.93(19) |
| C(14) – C(13) – C(12)   | 122.1(2)   | C(14) – C(13) – H(13)   | 119.0      |
| C(12) – C(13) – H(13)   | 119.0      | C(13) – C(14) – C(15)   | 116.4(2)   |
| C(13) – C(14) – C(1)    | 123.1(2)   | C(15) – C(14) – C(1)    | 120.4(2)   |
| C(16) – C(15) – C(14)   | 122.3(3)   | C(16) – C(15) – H(15)   | 118.8      |
| C(14) – C(15) – H(15)   | 118.8      | C(15) – C(16) – C(11)   | 121.8(2)   |
| C(15) – C(16) – H(16)   | 119.1      | C(11) – C(16) – H(16)   | 119.1      |
| C(1) – C(17) – H(17A)   | 109.5      | C(1) – C(17) – H(17B)   | 109.5      |
| C(1) – C(17) – H(17C)   | 109.5      | C(1) – C(18) – H(18A)   | 109.5      |
| C(1) – C(18) – H(18B)   | 109.5      | C(1) – C(18) – H(18C)   | 109.5      |
| C(1) – C(19) – H(19A)   | 109.5      | C(1) – C(19) – H(19B)   | 109.5      |
| C(1) – C(19) – H(19C)   | 109.5      | C(1) – C(69) – H(69A)   | 109.5      |
| C(1) – C(69) – H(69B)   | 109.5      | H(69A) – C(69) – H(69B) | 109.5      |
| C(1) – C(69) – H(69C)   | 109.5      | H(69A) – C(69) – H(69C) | 109.5      |
| H(69B) – C(69) – H(69C) | 109.5      | C(1) – C(68) – H(68A)   | 109.5      |
| C(1) – C(68) – H(68B)   | 109.5      | H(68A) – C(68) – H(68B) | 109.5      |
| C(1) – C(68) – H(68C)   | 109.5      | H(68A) – C(68) – H(68C) | 109.5      |
| H(68B) – C(68) – H(68C) | 109.5      | C(1) – C(67) – H(67A)   | 109.5      |
| C(1) – C(67) – H(67B)   | 109.5      | H(67A) – C(67) – H(67B) | 109.5      |
| C(1) – C(67) – H(67C)   | 109.5      | H(67A) – C(67) – H(67C) | 109.5      |
| H(67B) – C(67) – H(67C) | 109.5      | C(26) – C(21) – C(22)   | 116.3(2)   |
| C(26) – C(21) – C       | 124.9(2)   | C(22) – C(21) – C       | 118.7(2)   |
| C(23) – C(22) – C(21)   | 121.5(2)   | C(23) – C(22) – P(2)    | 125.3(2)   |
| C(21) – C(22) – P(2)    | 113.01(19) | C(24) – C(23) – C(22)   | 121.8(2)   |
| C(24) – C(23) – H(23)   | 119.1      | C(22) – C(23) – H(23)   | 119.1      |
| C(25) – C(24) – C(23)   | 116.5(2)   | C(25) – C(24) – C(2)    | 120.2(2)   |
| C(23) – C(24) – C(2)    | 123.3(2)   | C(26) – C(25) – C(24)   | 122.5(3)   |
| C(26) – C(25) – H(25)   | 118.8      | C(24) – C(25) – H(25)   | 118.8      |
| C(25) – C(26) – C(21)   | 121.5(2)   | C(25) – C(26) – H(26)   | 119.3      |
| C(21) – C(26) – H(26)   | 119.3      | C(2) – C(27) – H(27A)   | 109.5      |
| C(2) – C(27) – H(27B)   | 109.5      | H(27A) – C(27) – H(27B) | 109.5      |
| C(2) – C(27) – H(27C)   | 109.5      | H(27A) – C(27) – H(27C) | 109.5      |

Continued on next page

**Table S10.** – continued from previous page

| <b>atom – atom – atom</b> | <b>angle</b> | <b>atom – atom – atom</b> | <b>angle</b> |
|---------------------------|--------------|---------------------------|--------------|
| H(27B) – C(27) – H(27C)   | 109.5        | C(2) – C(28) – H(28A)     | 109.5        |
| C(2) – C(28) – H(28B)     | 109.5        | H(28A) – C(28) – H(28B)   | 109.5        |
| C(2) – C(28) – H(28C)     | 109.5        | H(28A) – C(28) – H(28C)   | 109.5        |
| H(28B) – C(28) – H(28C)   | 109.5        | C(2) – C(29) – H(29A)     | 109.5        |
| C(2) – C(29) – H(29B)     | 109.5        | H(29A) – C(29) – H(29B)   | 109.5        |
| C(2) – C(29) – H(29C)     | 109.5        | H(29A) – C(29) – H(29C)   | 109.5        |
| H(29B) – C(29) – H(29C)   | 109.5        | C(33) – C(31) – C(34)     | 110.2(2)     |
| C(33) – C(31) – P(1)      | 108.8(2)     | C(34) – C(31) – P(1)      | 112.4(2)     |
| C(33) – C(31) – H(31)     | 108.4        | C(34) – C(31) – H(31)     | 108.4        |
| P(1) – C(31) – H(31)      | 108.4        | C(35) – C(32) – C(36)     | 111.2(3)     |
| C(35) – C(32) – P(1)      | 109.7(2)     | C(36) – C(32) – P(1)      | 115.9(2)     |
| C(35) – C(32) – H(32)     | 106.5        | C(36) – C(32) – H(32)     | 106.5        |
| P(1) – C(32) – H(32)      | 106.5        | C(31) – C(33) – H(33A)    | 109.5        |
| C(31) – C(33) – H(33B)    | 109.5        | H(33A) – C(33) – H(33B)   | 109.5        |
| C(31) – C(33) – H(33C)    | 109.5        | H(33A) – C(33) – H(33C)   | 109.5        |
| H(33B) – C(33) – H(33C)   | 109.5        | C(31) – C(34) – H(34A)    | 109.5        |
| C(31) – C(34) – H(34B)    | 109.5        | H(34A) – C(34) – H(34B)   | 109.5        |
| C(31) – C(34) – H(34C)    | 109.5        | H(34A) – C(34) – H(34C)   | 109.5        |
| H(34B) – C(34) – H(34C)   | 109.5        | C(32) – C(35) – H(35A)    | 109.5        |
| C(32) – C(35) – H(35B)    | 109.5        | H(35A) – C(35) – H(35B)   | 109.5        |
| C(32) – C(35) – H(35C)    | 109.5        | H(35A) – C(35) – H(35C)   | 109.5        |
| H(35B) – C(35) – H(35C)   | 109.5        | C(32) – C(36) – H(36A)    | 109.5        |
| C(32) – C(36) – H(36B)    | 109.5        | H(36A) – C(36) – H(36B)   | 109.5        |
| C(32) – C(36) – H(36C)    | 109.5        | H(36A) – C(36) – H(36C)   | 109.5        |
| H(36B) – C(36) – H(36C)   | 109.5        | C(43) – C(41) – C(44)     | 112.0(3)     |
| C(43) – C(41) – P(2)      | 109.2(2)     | C(44) – C(41) – P(2)      | 112.9(2)     |
| C(43) – C(41) – H(41)     | 107.5        | C(44) – C(41) – H(41)     | 107.5        |
| P(2) – C(41) – H(41)      | 107.5        | C(45) – C(42) – C(46)     | 109.1(3)     |
| C(45) – C(42) – P(2)      | 114.4(3)     | C(46) – C(42) – P(2)      | 109.5(2)     |
| C(45) – C(42) – H(42)     | 107.9        | C(46) – C(42) – H(42)     | 107.9        |
| P(2) – C(42) – H(42)      | 107.9        | C(41) – C(43) – H(43A)    | 109.5        |
| C(41) – C(43) – H(43B)    | 109.5        | H(43A) – C(43) – H(43B)   | 109.5        |
| C(41) – C(43) – H(43C)    | 109.5        | H(43A) – C(43) – H(43C)   | 109.5        |
| H(43B) – C(43) – H(43C)   | 109.5        | C(41) – C(44) – H(44A)    | 109.5        |
| C(41) – C(44) – H(44B)    | 109.5        | H(44A) – C(44) – H(44B)   | 109.5        |
| C(41) – C(44) – H(44C)    | 109.5        | H(44A) – C(44) – H(44C)   | 109.5        |
| H(44B) – C(44) – H(44C)   | 109.5        | C(42) – C(45) – H(45A)    | 109.5        |
| C(42) – C(45) – H(45B)    | 109.5        | H(45A) – C(45) – H(45B)   | 109.5        |
| C(42) – C(45) – H(45C)    | 109.5        | H(45A) – C(45) – H(45C)   | 109.5        |
| H(45B) – C(45) – H(45C)   | 109.5        | C(42) – C(46) – H(46A)    | 109.5        |
| C(42) – C(46) – H(46B)    | 109.5        | H(46A) – C(46) – H(46B)   | 109.5        |
| C(42) – C(46) – H(46C)    | 109.5        | H(46A) – C(46) – H(46C)   | 109.5        |
| H(46B) – C(46) – H(46C)   | 109.5        | C(11) – C – C(21)         | 122.5(2)     |
| C(11) – C – Pd            | 118.5(2)     | C(21) – C – Pd            | 118.8(2)     |
| C – Pd – P(1)             | 83.32(8)     | C – Pd – P(2)             | 82.22(9)     |
| P(1) – Pd – P(2)          | 163.13(3)    | C – Pd – I(1)             | 176.1(2)     |
| P(1) – Pd – I(1)          | 94.47(7)     | P(2) – Pd – I(1)          | 100.43(8)    |
| C – Pd – I                | 175.42(13)   | P(1) – Pd – I             | 94.58(11)    |
| P(2) – Pd – I             | 99.20(11)    | I(1) – Pd – I             | 7.3(2)       |
| C(22) – P(2) – C(41)      | 103.78(13)   | C(22) – P(2) – C(42)      | 107.62(13)   |
| C(41) – P(2) – C(42)      | 106.49(14)   | C(22) – P(2) – Pd         | 101.68(9)    |

Continued on next page

**Table S10.** – continued from previous page

| <b>atom – atom – atom</b> | <b>angle</b> | <b>atom – atom – atom</b> | <b>angle</b> |
|---------------------------|--------------|---------------------------|--------------|
| C(41) – P(2) – Pd         | 124.71(10)   | C(42) – P(2) – Pd         | 111.14(11)   |

## 5.2 Crystal data for $[\{\text{PC}(\text{sp}^2)\text{P}\}^t\text{BuPdI}][\text{BAR}_4^{\text{F}}]$ (5)

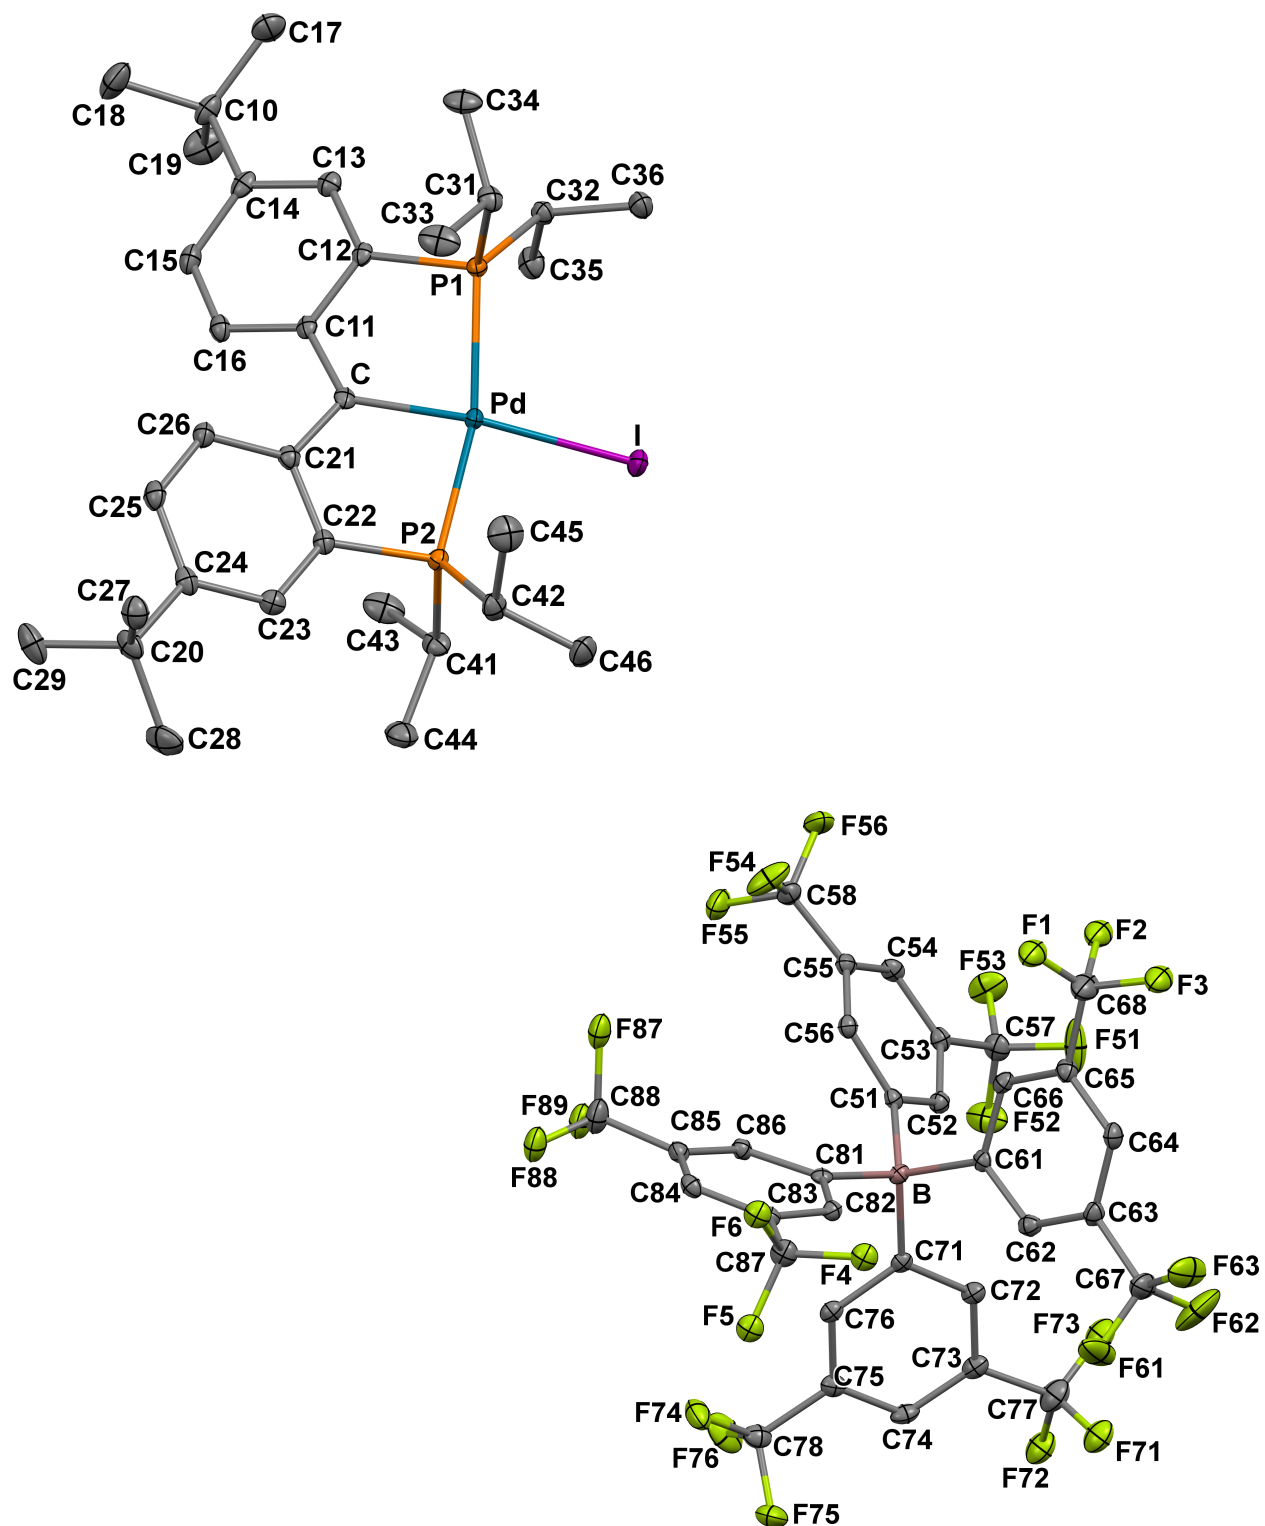

**Figure S45.** Thermal-ellipsoid representation of  $[\{\text{PC}(\text{sp}^2)\text{P}\}^t\text{BuPdI}][\text{BAR}_4^{\text{F}}]$  (5) at 50% probability. Hydrogen atoms were omitted for clarity.



**Table S11.** Crystal data and structure refinement for  $[\{\text{PC}(\text{sp}^2)\text{P}\}^{\text{tBu}}\text{Pd}][\text{BAr}_4^{\text{F}}]$  (**5**).

|                                          |                                                                 |                                                                           |
|------------------------------------------|-----------------------------------------------------------------|---------------------------------------------------------------------------|
| Identification code:                     | pc28c                                                           |                                                                           |
| Empirical formula:                       | $\text{C}_{65}\text{H}_{64}\text{BF}_{24}\text{IP}_2\text{Pd}$  |                                                                           |
| Formula weight:                          | 1607.21                                                         |                                                                           |
| Temperature:                             | 120(2) K                                                        |                                                                           |
| Wavelength:                              | 0.71073 Å                                                       |                                                                           |
| Crystal system:                          | Monoclinic                                                      |                                                                           |
| Space group:                             | $P2_1/n$                                                        |                                                                           |
| Unit cell dimensions:                    | $a = 14.0602(6)$ Å<br>$b = 28.6171(12)$ Å<br>$c = 16.9031(7)$ Å | $\alpha = 90^\circ$<br>$\beta = 92.0331(16)^\circ$<br>$\gamma = 90^\circ$ |
| Volume:                                  | $6796.9(5)$ Å <sup>3</sup>                                      |                                                                           |
| Z:                                       | 4                                                               |                                                                           |
| Density (calculated):                    | $1.571$ g·cm <sup>-3</sup>                                      |                                                                           |
| Absorption coefficient ( $\mu$ ):        | $0.879$ mm <sup>-1</sup>                                        |                                                                           |
| F(000):                                  | 3216                                                            |                                                                           |
| Crystal size:                            | $0.09 \times 0.08 \times 0.05$ mm <sup>3</sup>                  |                                                                           |
| $\theta$ range for data collection:      | 1.40 to 25.00°                                                  |                                                                           |
| Index ranges:                            | $-16 \leq h \leq 16, -34 \leq k \leq 34, -14 \leq l \leq 20$    |                                                                           |
| Reflections collected:                   | 119559                                                          |                                                                           |
| Independent reflections:                 | 11970 [ $R_{\text{int}} = 0.0438$ ]                             |                                                                           |
| Completeness to $\theta = 25.00^\circ$ : | 100.0 %                                                         |                                                                           |
| Absorption correction:                   | Semi-empirical from equivalents                                 |                                                                           |
| Max. and min. transmission:              | 0.8657 and 0.8133                                               |                                                                           |
| Refinement method:                       | Full-matrix least-squares on $F^2$                              |                                                                           |
| Data / restraints / parameters:          | 11970 / 3 / 863                                                 |                                                                           |
| Goodness-of-fit on $F^2$ :               | 1.059                                                           |                                                                           |
| Final R indices [ $I > 2\sigma(I)$ ]:    | $R_1 = 0.0320, wR_2 = 0.0725$                                   |                                                                           |
| R indices (all data):                    | $R_1 = 0.0412, wR_2 = 0.0763$                                   |                                                                           |
| Largest diff. peak and hole:             | 1.082 and $-0.735$ e <sup>-</sup> ·Å <sup>-3</sup>              |                                                                           |

**Table S12.** Atomic coordinates and equivalent isotropic displacement parameters ( $\text{\AA}^2$ ) for  $[(\text{PC}(\text{sp}^2)\text{P})^t\text{BuPdI}][\text{BAR}_4^{\text{F}}]$  (**5**).  $U(\text{eq})$  is defined as one third of the trace of the orthogonalized  $U_{ij}$  tensor

| atom  | x           | y           | z            | U(eq)    |
|-------|-------------|-------------|--------------|----------|
| F(86) | -0.1048(4)  | 0.75394(17) | -0.0477(3)   | 0.036(1) |
| F(84) | -0.2358(3)  | 0.7229(2)   | -0.0143(3)   | 0.036(1) |
| F(85) | -0.1295(4)  | 0.68176(19) | -0.0689(3)   | 0.036(1) |
| F(89) | -0.1743(6)  | 0.6766(2)   | -0.0497(4)   | 0.036(1) |
| F(88) | -0.2045(6)  | 0.7481(3)   | -0.0172(4)   | 0.036(1) |
| F(87) | -0.0687(5)  | 0.7294(3)   | -0.0644(3)   | 0.036(1) |
| F(93) | -0.0849(7)  | 0.7019(4)   | -0.0704(4)   | 0.036(1) |
| F(92) | -0.1598(8)  | 0.7610(3)   | -0.0246(5)   | 0.036(1) |
| F(91) | -0.2208(6)  | 0.6905(3)   | -0.0225(4)   | 0.036(1) |
| F(72) | -0.1004(3)  | 0.42844(15) | 0.3578(3)    | 0.039(1) |
| F(71) | -0.0194(4)  | 0.47866(13) | 0.4270(2)    | 0.039(1) |
| F(73) | 0.0446(4)   | 0.44413(16) | 0.3310(3)    | 0.039(1) |
| F(78) | 0.0246(4)   | 0.4345(2)   | 0.3190(3)    | 0.039(1) |
| F(77) | -0.0980(4)  | 0.44032(17) | 0.3894(3)    | 0.039(1) |
| F(79) | 0.0272(4)   | 0.48333(16) | 0.4161(3)    | 0.039(1) |
| P(1)  | 0.43254(5)  | 0.43582(2)  | 0.34704(4)   | 0.015(1) |
| I     | 0.45934(1)  | 0.38181(1)  | 0.55267(1)   | 0.026(1) |
| P(2)  | 0.24496(5)  | 0.33009(2)  | 0.47026(4)   | 0.016(1) |
| C(11) | 0.33757(19) | 0.37541(9)  | 0.24844(16)  | 0.016(1) |
| C(10) | 0.5072(2)   | 0.40040(11) | 0.04230(17)  | 0.025(1) |
| C(12) | 0.41046(19) | 0.40948(9)  | 0.25057(16)  | 0.016(1) |
| C(14) | 0.4471(2)   | 0.39268(10) | 0.11472(16)  | 0.020(1) |
| C(13) | 0.46169(19) | 0.41830(10) | 0.18383(16)  | 0.020(1) |
| C(15) | 0.3787(2)   | 0.35739(10) | 0.11456(16)  | 0.022(1) |
| C(16) | 0.32412(19) | 0.34902(10) | 0.17886(16)  | 0.020(1) |
| C(21) | 0.19279(19) | 0.34753(9)  | 0.31685(16)  | 0.018(1) |
| C(20) | -0.0881(2)  | 0.28365(11) | 0.31899(19)  | 0.026(1) |
| C(19) | 0.5756(3)   | 0.35883(13) | 0.0377(2)    | 0.041(1) |
| C(18) | 0.4434(3)   | 0.40311(15) | -0.03279(19) | 0.044(1) |
| C(17) | 0.5663(2)   | 0.44526(12) | 0.0482(2)    | 0.036(1) |
| C(22) | 0.16059(19) | 0.32597(9)  | 0.38607(16)  | 0.017(1) |
| C(26) | 0.12975(19) | 0.34916(10) | 0.25022(16)  | 0.020(1) |
| C(25) | 0.0422(2)   | 0.32839(10) | 0.25225(17)  | 0.023(1) |
| C(24) | 0.01145(19) | 0.30509(10) | 0.31908(17)  | 0.021(1) |
| C(23) | 0.07221(19) | 0.30471(10) | 0.38631(17)  | 0.021(1) |
| C(66) | 0.22058(19) | 0.63185(9)  | 0.20521(16)  | 0.018(1) |
| C(65) | 0.2936(2)   | 0.64826(10) | 0.25474(17)  | 0.021(1) |
| C(31) | 0.3746(2)   | 0.49363(10) | 0.34450(17)  | 0.022(1) |
| C(29) | -0.1116(2)  | 0.25768(12) | 0.2414(2)    | 0.038(1) |
| C(28) | -0.1000(2)  | 0.25007(13) | 0.3878(2)    | 0.043(1) |
| C(27) | -0.1589(2)  | 0.32423(11) | 0.32646(19)  | 0.029(1) |
| C(67) | 0.1925(2)   | 0.62772(13) | 0.45347(19)  | 0.036(1) |
| F(67) | 0.3690(4)   | 0.6842(3)   | 0.1474(4)    | 0.037(1) |
| F(69) | 0.4540(4)   | 0.6424(2)   | 0.2272(4)    | 0.037(1) |
| F(68) | 0.4058(4)   | 0.7100(2)   | 0.2634(4)    | 0.037(1) |
| F(65) | 0.3808(3)   | 0.71636(17) | 0.2286(4)    | 0.037(1) |
| F(66) | 0.3871(3)   | 0.6620(2)   | 0.1424(3)    | 0.037(1) |
| F(64) | 0.4621(4)   | 0.6533(2)   | 0.2560(3)    | 0.037(1) |
| F(2)  | 0.4187(6)   | 0.6324(4)   | 0.1679(5)    | 0.037(1) |

Continued on next page

**Table S12.** – continued from previous page

| atom  | x            | y           | x            | U(eq)    |
|-------|--------------|-------------|--------------|----------|
| F(3)  | 0.4548(7)    | 0.6718(4)   | 0.2728(6)    | 0.037(1) |
| F(1)  | 0.3724(6)    | 0.7037(4)   | 0.1824(7)    | 0.037(1) |
| C(32) | 0.56173(19)  | 0.44602(10) | 0.35246(16)  | 0.019(1) |
| C(33) | 0.2667(2)    | 0.48824(11) | 0.3424(2)    | 0.036(1) |
| C(34) | 0.4062(2)    | 0.52450(11) | 0.2767(2)    | 0.033(1) |
| C(35) | 0.6152(2)    | 0.39965(11) | 0.35036(19)  | 0.027(1) |
| C(36) | 0.5911(2)    | 0.47483(11) | 0.42538(17)  | 0.025(1) |
| B     | 0.0454(2)    | 0.60198(11) | 0.17378(18)  | 0.016(1) |
| C(41) | 0.2913(2)    | 0.27148(10) | 0.49131(18)  | 0.024(1) |
| C(42) | 0.1713(2)    | 0.34836(11) | 0.55244(17)  | 0.024(1) |
| C(43) | 0.3465(2)    | 0.25450(11) | 0.4207(2)    | 0.038(1) |
| C(44) | 0.2157(2)    | 0.23622(11) | 0.5141(2)    | 0.033(1) |
| C(45) | 0.1413(3)    | 0.39911(12) | 0.5404(2)    | 0.038(1) |
| C(46) | 0.2189(2)    | 0.34095(12) | 0.63398(18)  | 0.034(1) |
| F(51) | 0.24050(17)  | 0.44774(7)  | 0.10532(14)  | 0.057(1) |
| C(51) | 0.08602(18)  | 0.57470(9)  | 0.09620(16)  | 0.016(1) |
| C(52) | 0.10607(19)  | 0.52708(10) | 0.10021(16)  | 0.019(1) |
| F(52) | 0.09831(15)  | 0.42709(6)  | 0.07767(13)  | 0.047(1) |
| F(53) | 0.19843(15)  | 0.43079(6)  | -0.01352(12) | 0.043(1) |
| C(53) | 0.14469(19)  | 0.50265(10) | 0.03824(16)  | 0.019(1) |
| F(54) | 0.16394(17)  | 0.64114(7)  | -0.11065(11) | 0.049(1) |
| C(54) | 0.16168(19)  | 0.52419(10) | -0.03266(17) | 0.021(1) |
| F(55) | 0.07832(14)  | 0.58839(7)  | -0.16554(11) | 0.041(1) |
| C(55) | 0.14254(19)  | 0.57147(10) | -0.03870(16) | 0.019(1) |
| C(57) | 0.1703(2)    | 0.45249(10) | 0.05134(18)  | 0.026(1) |
| C(56) | 0.10747(18)  | 0.59624(10) | 0.02467(16)  | 0.018(1) |
| F(56) | 0.22710(14)  | 0.57923(8)  | -0.15645(11) | 0.045(1) |
| C(58) | 0.1536(2)    | 0.59502(11) | -0.11670(17) | 0.025(1) |
| C(61) | 0.13574(18)  | 0.61449(9)  | 0.23421(16)  | 0.015(1) |
| C(62) | 0.1301(2)    | 0.61431(9)  | 0.31637(17)  | 0.020(1) |
| C(63) | 0.2036(2)    | 0.63020(10) | 0.36643(17)  | 0.022(1) |
| F(62) | 0.2077(2)    | 0.58477(10) | 0.48182(13)  | 0.078(1) |
| F(63) | 0.25338(15)  | 0.65454(9)  | 0.49435(11)  | 0.057(1) |
| F(61) | 0.10588(15)  | 0.63912(11) | 0.47494(12)  | 0.069(1) |
| C(64) | 0.2864(2)    | 0.64751(10) | 0.33606(17)  | 0.022(1) |
| C     | 0.28632(19)  | 0.36807(9)  | 0.31980(16)  | 0.017(1) |
| Pd    | 0.35373(1)   | 0.38105(1)  | 0.42142(1)   | 0.015(1) |
| C(73) | -0.0698(2)   | 0.50235(9)  | 0.30162(16)  | 0.021(1) |
| C(72) | -0.0044(2)   | 0.53158(9)  | 0.26666(16)  | 0.019(1) |
| C(71) | -0.03182(19) | 0.56843(9)  | 0.21675(15)  | 0.016(1) |
| C(68) | 0.3806(2)    | 0.66843(13) | 0.2214(2)    | 0.037(1) |
| C(78) | -0.2994(2)   | 0.55336(11) | 0.22561(18)  | 0.026(1) |
| C(77) | -0.0341(3)   | 0.46486(12) | 0.3556(2)    | 0.039(1) |
| C(76) | -0.12993(19) | 0.57447(9)  | 0.20452(16)  | 0.018(1) |
| F(76) | -0.33910(14) | 0.52138(8)  | 0.17673(13)  | 0.049(1) |
| C(75) | -0.1954(2)   | 0.54550(10) | 0.23972(16)  | 0.020(1) |
| F(75) | -0.34721(13) | 0.55060(7)  | 0.29218(11)  | 0.040(1) |
| C(74) | -0.1660(2)   | 0.50912(10) | 0.28824(17)  | 0.023(1) |
| F(74) | -0.32043(12) | 0.59480(7)  | 0.19411(12)  | 0.040(1) |
| F(81) | -0.0122(8)   | 0.7534(3)   | 0.3285(4)    | 0.026(1) |
| F(83) | -0.0039(7)   | 0.8056(3)   | 0.2308(3)    | 0.026(1) |

Continued on next page

**Table S12.** – continued from previous page

| atom   | x            | y           | z           | U(eq)    |
|--------|--------------|-------------|-------------|----------|
| F(82)  | -0.1422(5)   | 0.7813(4)   | 0.2761(5)   | 0.026(1) |
| F(6)   | -0.0311(10)  | 0.8093(4)   | 0.2405(7)   | 0.026(1) |
| F(5)   | -0.1389(8)   | 0.7703(4)   | 0.2908(7)   | 0.026(1) |
| F(4)   | 0.0136(9)    | 0.7589(4)   | 0.3159(7)   | 0.026(1) |
| F(9)   | -0.0391(7)   | 0.7469(3)   | 0.3328(5)   | 0.026(1) |
| F(8)   | -0.1346(7)   | 0.7912(3)   | 0.2604(6)   | 0.026(1) |
| F(7)   | 0.0094(7)    | 0.7979(3)   | 0.2525(7)   | 0.026(1) |
| C(81)  | -0.00646(18) | 0.65221(9)  | 0.15258(15) | 0.014(1) |
| C(82)  | -0.00884(18) | 0.68761(9)  | 0.20958(16) | 0.016(1) |
| C(83)  | -0.05384(19) | 0.73001(9)  | 0.19617(16) | 0.018(1) |
| C(87)  | -0.0532(2)   | 0.76645(10) | 0.25890(18) | 0.026(1) |
| C(86)  | -0.05441(18) | 0.66243(10) | 0.08085(16) | 0.017(1) |
| C(85)  | -0.09696(19) | 0.70548(10) | 0.06564(17) | 0.019(1) |
| C(84)  | -0.09759(19) | 0.73977(9)  | 0.12317(17) | 0.019(1) |
| C(88)  | -0.1400(3)   | 0.71531(12) | -0.0142(2)  | 0.036(1) |
| H(13)  | 0.5080       | 0.4425      | 0.1853      | 0.024    |
| H(15)  | 0.3695       | 0.3386      | 0.0686      | 0.027    |
| H(16)  | 0.2770       | 0.3252      | 0.1763      | 0.024    |
| H(19A) | 0.6185       | 0.3636      | -0.0060     | 0.062    |
| H(19B) | 0.5391       | 0.3300      | 0.0288      | 0.062    |
| H(19C) | 0.6131       | 0.3563      | 0.0875      | 0.062    |
| H(18A) | 0.4827       | 0.4084      | -0.0786     | 0.066    |
| H(18B) | 0.3982       | 0.4289      | -0.0281     | 0.066    |
| H(18C) | 0.4084       | 0.3737      | -0.0398     | 0.066    |
| H(17A) | 0.5242       | 0.4720      | 0.0566      | 0.054    |
| H(17B) | 0.6001       | 0.4498      | -0.0009     | 0.054    |
| H(17C) | 0.6126       | 0.4428      | 0.0928      | 0.054    |
| H(26)  | 0.1481       | 0.3648      | 0.2036      | 0.024    |
| H(25)  | 0.0010       | 0.3299      | 0.2065      | 0.027    |
| H(23)  | 0.0525       | 0.2896      | 0.4330      | 0.025    |
| H(66)  | 0.2284       | 0.6324      | 0.1496      | 0.022    |
| H(31)  | 0.3932       | 0.5099      | 0.3950      | 0.026    |
| H(29A) | -0.0655      | 0.2324      | 0.2347      | 0.056    |
| H(29B) | -0.1083      | 0.2795      | 0.1969      | 0.056    |
| H(29C) | -0.1758      | 0.2445      | 0.2430      | 0.056    |
| H(28A) | -0.0508      | 0.2258      | 0.3865      | 0.064    |
| H(28B) | -0.1630      | 0.2355      | 0.3834      | 0.064    |
| H(28C) | -0.0938      | 0.2673      | 0.4378      | 0.064    |
| H(27A) | -0.2235      | 0.3117      | 0.3302      | 0.044    |
| H(27B) | -0.1559      | 0.3444      | 0.2798      | 0.044    |
| H(27C) | -0.1424      | 0.3424      | 0.3741      | 0.044    |
| H(32)  | 0.5786       | 0.4643      | 0.3046      | 0.023    |
| H(33A) | 0.2458       | 0.4726      | 0.2932      | 0.055    |
| H(33B) | 0.2369       | 0.5192      | 0.3450      | 0.055    |
| H(33C) | 0.2479       | 0.4695      | 0.3878      | 0.055    |
| H(34A) | 0.3893       | 0.5094      | 0.2260      | 0.049    |
| H(34B) | 0.4753       | 0.5290      | 0.2811      | 0.049    |
| H(34C) | 0.3743       | 0.5549      | 0.2794      | 0.049    |
| H(35A) | 0.6838       | 0.4056      | 0.3540      | 0.040    |
| H(35B) | 0.5991       | 0.3834      | 0.3006      | 0.040    |
| H(35C) | 0.5969       | 0.3802      | 0.3951      | 0.040    |

Continued on next page

**Table S12.** – continued from previous page

| atom   | x       | y      | z       | U(eq) |
|--------|---------|--------|---------|-------|
| H(36A) | 0.5586  | 0.5051 | 0.4231  | 0.038 |
| H(36B) | 0.6601  | 0.4798 | 0.4266  | 0.038 |
| H(36C) | 0.5733  | 0.4581 | 0.4732  | 0.038 |
| H(41)  | 0.3377  | 0.2742 | 0.5373  | 0.028 |
| H(42)  | 0.1122  | 0.3289 | 0.5499  | 0.029 |
| H(43A) | 0.3968  | 0.2770 | 0.4094  | 0.056 |
| H(43B) | 0.3031  | 0.2516 | 0.3744  | 0.056 |
| H(43C) | 0.3751  | 0.2240 | 0.4331  | 0.056 |
| H(44A) | 0.1720  | 0.2306 | 0.4686  | 0.050 |
| H(44B) | 0.1800  | 0.2486 | 0.5583  | 0.050 |
| H(44C) | 0.2464  | 0.2068 | 0.5301  | 0.050 |
| H(45A) | 0.1101  | 0.4027 | 0.4879  | 0.057 |
| H(45B) | 0.1976  | 0.4193 | 0.5443  | 0.057 |
| H(45C) | 0.0968  | 0.4080 | 0.5811  | 0.057 |
| H(46A) | 0.2765  | 0.3602 | 0.6389  | 0.051 |
| H(46B) | 0.2359  | 0.3079 | 0.6405  | 0.051 |
| H(46C) | 0.1748  | 0.3500 | 0.6749  | 0.051 |
| H(52)  | 0.0927  | 0.5107 | 0.1474  | 0.022 |
| H(54)  | 0.1857  | 0.5072 | -0.0759 | 0.025 |
| H(56)  | 0.0977  | 0.6289 | 0.0192  | 0.021 |
| H(62)  | 0.0738  | 0.6029 | 0.3390  | 0.024 |
| H(64)  | 0.3368  | 0.6586 | 0.3700  | 0.027 |
| H(72)  | 0.0616  | 0.5263 | 0.2771  | 0.023 |
| H(76)  | -0.1524 | 0.5991 | 0.1712  | 0.021 |
| H(74)  | -0.2111 | 0.4892 | 0.3118  | 0.027 |
| H(82)  | 0.0218  | 0.6823 | 0.2598  | 0.019 |
| H(86)  | -0.0581 | 0.6390 | 0.0410  | 0.021 |
| H(84)  | -0.1271 | 0.7691 | 0.1131  | 0.023 |

**Table S13.** Anisotropic displacement parameters ( $\text{\AA}^2$ ) for  $[\{\text{PC}(\text{sp}^2)\text{P}\}^{\text{tBu}}\text{PdI}][\text{BAR}_4^{\text{F}}]$  (**5**). The anisotropic displacement factor exponent takes the form:  $-2\pi^2[h^2a^*{}^2U_{11} + \dots + 2hka^*b^*U_{12}]$ .

| atom  | $U_{11}$   | $U_{22}$   | $U_{33}$   | $U_{23}$    | $U_{13}$    | $U_{12}$    |
|-------|------------|------------|------------|-------------|-------------|-------------|
| F(86) | 0.0433(12) | 0.0386(11) | 0.0260(8)  | 0.0000(8)   | -0.0117(8)  | 0.0086(9)   |
| F(84) | 0.0433(12) | 0.0386(11) | 0.0260(8)  | 0.0000(8)   | -0.0117(8)  | 0.0086(9)   |
| F(85) | 0.0433(12) | 0.0386(11) | 0.0260(8)  | 0.0000(8)   | -0.0117(8)  | 0.0086(9)   |
| F(89) | 0.0433(12) | 0.0386(11) | 0.0260(8)  | 0.0000(8)   | -0.0117(8)  | 0.0086(9)   |
| F(88) | 0.0433(12) | 0.0386(11) | 0.0260(8)  | 0.0000(8)   | -0.0117(8)  | 0.0086(9)   |
| F(87) | 0.0433(12) | 0.0386(11) | 0.0260(8)  | 0.0000(8)   | -0.0117(8)  | 0.0086(9)   |
| F(93) | 0.0433(12) | 0.0386(11) | 0.0260(8)  | 0.0000(8)   | -0.0117(8)  | 0.0086(9)   |
| F(92) | 0.0433(12) | 0.0386(11) | 0.0260(8)  | 0.0000(8)   | -0.0117(8)  | 0.0086(9)   |
| F(91) | 0.0433(12) | 0.0386(11) | 0.0260(8)  | 0.0000(8)   | -0.0117(8)  | 0.0086(9)   |
| F(72) | 0.0524(11) | 0.0292(9)  | 0.0349(9)  | 0.0080(7)   | -0.0012(8)  | 0.0000(7)   |
| F(71) | 0.0524(11) | 0.0292(9)  | 0.0349(9)  | 0.0080(7)   | -0.0012(8)  | 0.0000(7)   |
| F(73) | 0.0524(11) | 0.0292(9)  | 0.0349(9)  | 0.0080(7)   | -0.0012(8)  | 0.0000(7)   |
| F(78) | 0.0524(11) | 0.0292(9)  | 0.0349(9)  | 0.0080(7)   | -0.0012(8)  | 0.0000(7)   |
| F(77) | 0.0524(11) | 0.0292(9)  | 0.0349(9)  | 0.0080(7)   | -0.0012(8)  | 0.0000(7)   |
| F(79) | 0.0524(11) | 0.0292(9)  | 0.0349(9)  | 0.0080(7)   | -0.0012(8)  | 0.0000(7)   |
| P(1)  | 0.0164(3)  | 0.0148(3)  | 0.0148(3)  | -0.0006(3)  | -0.0009(3)  | -0.0005(3)  |
| I     | 0.0257(1)  | 0.0332(1)  | 0.0174(1)  | 0.0038(1)   | -0.0078(1)  | -0.0062(1)  |
| P(2)  | 0.0167(3)  | 0.0161(3)  | 0.0153(3)  | 0.0006(3)   | -0.0016(3)  | -0.0002(3)  |
| C(11) | 0.0169(13) | 0.0138(13) | 0.0168(14) | 0.0004(11)  | -0.0048(11) | 0.0037(11)  |
| C(10) | 0.0269(16) | 0.0329(17) | 0.0164(15) | 0.0004(13)  | 0.0020(12)  | 0.0077(13)  |
| C(12) | 0.0187(13) | 0.0148(13) | 0.0150(14) | 0.0002(11)  | -0.0031(11) | 0.0042(11)  |
| C(14) | 0.0208(14) | 0.0235(15) | 0.0168(14) | 0.0027(12)  | -0.0015(11) | 0.0099(12)  |
| C(13) | 0.0187(14) | 0.0202(14) | 0.0205(15) | 0.0013(12)  | -0.0012(11) | 0.0033(11)  |
| C(15) | 0.0255(15) | 0.0242(15) | 0.0163(14) | -0.0045(12) | -0.0042(12) | 0.0061(12)  |
| C(16) | 0.0194(14) | 0.0192(14) | 0.0205(15) | -0.0026(12) | -0.0055(11) | 0.0023(11)  |
| C(21) | 0.0186(14) | 0.0156(14) | 0.0191(14) | -0.0015(11) | -0.0016(11) | 0.0011(11)  |
| C(20) | 0.0171(14) | 0.0258(16) | 0.0357(18) | -0.0026(14) | -0.0043(13) | -0.0020(12) |
| C(19) | 0.038(2)   | 0.046(2)   | 0.042(2)   | 0.0006(17)  | 0.0151(16)  | 0.0148(17)  |
| C(18) | 0.039(2)   | 0.072(3)   | 0.0199(17) | 0.0073(17)  | 0.0003(15)  | 0.0006(19)  |
| C(17) | 0.0376(19) | 0.043(2)   | 0.0278(18) | 0.0029(15)  | 0.0112(15)  | -0.0038(16) |
| C(22) | 0.0162(13) | 0.0160(14) | 0.0184(14) | -0.0027(11) | -0.0023(11) | 0.0025(11)  |
| C(26) | 0.0215(14) | 0.0209(14) | 0.0171(14) | -0.0014(12) | -0.0029(11) | 0.0011(12)  |
| C(25) | 0.0203(14) | 0.0248(15) | 0.0228(15) | -0.0019(12) | -0.0070(12) | 0.0030(12)  |
| C(24) | 0.0183(14) | 0.0185(14) | 0.0262(16) | -0.0059(12) | -0.0035(12) | 0.0031(11)  |
| C(23) | 0.0195(14) | 0.0202(15) | 0.0227(15) | -0.0001(12) | 0.0022(12)  | 0.0008(12)  |
| C(66) | 0.0228(14) | 0.0162(14) | 0.0159(14) | 0.0023(11)  | 0.0000(11)  | 0.0017(11)  |
| C(65) | 0.0201(14) | 0.0201(15) | 0.0226(15) | 0.0021(12)  | -0.0021(12) | -0.0021(12) |
| C(31) | 0.0241(15) | 0.0164(14) | 0.0252(16) | -0.0031(12) | -0.0007(12) | 0.0027(12)  |
| C(29) | 0.0226(16) | 0.0366(19) | 0.053(2)   | -0.0185(17) | -0.0051(15) | -0.0022(14) |
| C(28) | 0.0229(17) | 0.043(2)   | 0.062(3)   | 0.0144(18)  | -0.0070(16) | -0.0132(15) |
| C(27) | 0.0224(16) | 0.0356(18) | 0.0294(17) | -0.0044(14) | -0.0005(13) | 0.0012(13)  |
| C(67) | 0.0295(18) | 0.058(2)   | 0.0188(16) | -0.0017(16) | -0.0016(14) | -0.0036(16) |
| F(67) | 0.0293(8)  | 0.0495(12) | 0.0328(11) | 0.0077(10)  | -0.0028(8)  | -0.0135(8)  |
| F(69) | 0.0293(8)  | 0.0495(12) | 0.0328(11) | 0.0077(10)  | -0.0028(8)  | -0.0135(8)  |
| F(68) | 0.0293(8)  | 0.0495(12) | 0.0328(11) | 0.0077(10)  | -0.0028(8)  | -0.0135(8)  |
| F(65) | 0.0293(8)  | 0.0495(12) | 0.0328(11) | 0.0077(10)  | -0.0028(8)  | -0.0135(8)  |
| F(66) | 0.0293(8)  | 0.0495(12) | 0.0328(11) | 0.0077(10)  | -0.0028(8)  | -0.0135(8)  |
| F(64) | 0.0293(8)  | 0.0495(12) | 0.0328(11) | 0.0077(10)  | -0.0028(8)  | -0.0135(8)  |
| F(2)  | 0.0293(8)  | 0.0495(12) | 0.0328(11) | 0.0077(10)  | -0.0028(8)  | -0.0135(8)  |

Continued on next page

**Table S13.** – continued from previous page

| atom  | U <sub>11</sub> | U <sub>22</sub> | U <sub>33</sub> | U <sub>23</sub> | U <sub>13</sub> | U <sub>12</sub> |
|-------|-----------------|-----------------|-----------------|-----------------|-----------------|-----------------|
| F(3)  | 0.0293(8)       | 0.0495(12)      | 0.0328(11)      | 0.0077(10)      | -0.0028(8)      | -0.0135(8)      |
| F(1)  | 0.0293(8)       | 0.0495(12)      | 0.0328(11)      | 0.0077(10)      | -0.0028(8)      | -0.0135(8)      |
| C(32) | 0.0173(14)      | 0.0222(15)      | 0.0185(14)      | -0.0008(12)     | 0.0006(11)      | -0.0024(11)     |
| C(33) | 0.0259(17)      | 0.0258(17)      | 0.058(2)        | 0.0061(16)      | 0.0082(16)      | 0.0110(14)      |
| C(34) | 0.0331(18)      | 0.0206(16)      | 0.046(2)        | 0.0107(15)      | 0.0071(15)      | 0.0044(13)      |
| C(35) | 0.0195(15)      | 0.0283(16)      | 0.0321(17)      | -0.0023(14)     | -0.0042(13)     | 0.0036(13)      |
| C(36) | 0.0230(15)      | 0.0292(16)      | 0.0232(16)      | -0.0015(13)     | -0.0022(12)     | -0.0065(13)     |
| B     | 0.0186(15)      | 0.0152(15)      | 0.0138(15)      | -0.0001(12)     | 0.0004(12)      | -0.0008(12)     |
| C(41) | 0.0214(15)      | 0.0187(15)      | 0.0305(17)      | 0.0043(13)      | -0.0038(12)     | 0.0028(12)      |
| C(42) | 0.0239(15)      | 0.0286(16)      | 0.0198(15)      | -0.0056(13)     | 0.0045(12)      | -0.0023(13)     |
| C(43) | 0.0330(18)      | 0.0224(17)      | 0.058(2)        | 0.0003(16)      | 0.0114(17)      | 0.0085(14)      |
| C(44) | 0.0385(19)      | 0.0217(16)      | 0.040(2)        | 0.0065(14)      | -0.0029(15)     | -0.0033(14)     |
| C(45) | 0.040(2)        | 0.0335(19)      | 0.041(2)        | -0.0073(16)     | 0.0094(16)      | 0.0099(15)      |
| C(46) | 0.0391(19)      | 0.044(2)        | 0.0191(16)      | -0.0026(14)     | 0.0028(14)      | -0.0074(16)     |
| F(51) | 0.0675(15)      | 0.0327(11)      | 0.0690(15)      | -0.0113(11)     | -0.0406(12)     | 0.0251(11)      |
| C(51) | 0.0129(13)      | 0.0178(14)      | 0.0174(14)      | -0.0012(11)     | -0.0022(11)     | -0.0003(11)     |
| C(52) | 0.0182(14)      | 0.0204(15)      | 0.0171(14)      | 0.0001(11)      | -0.0021(11)     | -0.0006(11)     |
| F(52) | 0.0532(13)      | 0.0200(10)      | 0.0696(15)      | 0.0054(10)      | 0.0240(11)      | 0.0030(9)       |
| F(53) | 0.0666(14)      | 0.0235(10)      | 0.0389(11)      | -0.0073(8)      | 0.0166(10)      | 0.0125(9)       |
| C(53) | 0.0175(14)      | 0.0178(14)      | 0.0216(15)      | -0.0029(12)     | -0.0021(11)     | 0.0009(11)      |
| F(54) | 0.0938(17)      | 0.0288(11)      | 0.0251(10)      | 0.0024(9)       | 0.0109(11)      | -0.0133(11)     |
| C(54) | 0.0198(14)      | 0.0238(15)      | 0.0193(15)      | -0.0081(12)     | 0.0003(12)      | 0.0018(12)      |
| F(55) | 0.0385(11)      | 0.0590(13)      | 0.0250(10)      | 0.0112(9)       | -0.0087(8)      | -0.0036(10)     |
| C(55) | 0.0160(13)      | 0.0232(15)      | 0.0173(14)      | -0.0015(12)     | -0.0006(11)     | -0.0008(11)     |
| C(57) | 0.0297(16)      | 0.0199(15)      | 0.0279(17)      | -0.0044(13)     | 0.0019(13)      | 0.0058(13)      |
| C(56) | 0.0173(13)      | 0.0170(14)      | 0.0186(14)      | -0.0008(11)     | -0.0022(11)     | -0.0002(11)     |
| F(56) | 0.0425(12)      | 0.0671(14)      | 0.0277(10)      | 0.0136(10)      | 0.0168(9)       | 0.0191(10)      |
| C(58) | 0.0256(16)      | 0.0297(17)      | 0.0191(15)      | -0.0028(13)     | 0.0009(12)      | 0.0017(13)      |
| C(61) | 0.0172(13)      | 0.0111(13)      | 0.0175(14)      | 0.0007(11)      | 0.0001(11)      | 0.0036(10)      |
| C(62) | 0.0213(14)      | 0.0186(14)      | 0.0204(15)      | 0.0003(12)      | 0.0033(12)      | 0.0011(11)      |
| C(63) | 0.0239(15)      | 0.0245(15)      | 0.0158(14)      | -0.0020(12)     | -0.0024(12)     | 0.0044(12)      |
| F(62) | 0.129(2)        | 0.0788(19)      | 0.0265(12)      | 0.0219(12)      | 0.0066(14)      | -0.0013(17)     |
| F(63) | 0.0458(12)      | 0.105(2)        | 0.0201(10)      | -0.0165(11)     | -0.0031(9)      | -0.0233(13)     |
| F(61) | 0.0323(12)      | 0.155(3)        | 0.0217(11)      | -0.0198(14)     | 0.0043(9)       | 0.0017(14)      |
| C(64) | 0.0216(14)      | 0.0245(15)      | 0.0198(15)      | -0.0010(12)     | -0.0059(12)     | 0.0007(12)      |
| C     | 0.0221(14)      | 0.0092(13)      | 0.0182(14)      | -0.0013(11)     | -0.0021(11)     | 0.0024(11)      |
| Pd    | 0.0161(1)       | 0.0153(1)       | 0.0129(1)       | 0.0005(1)       | -0.0027(1)      | -0.0016(1)      |
| C(73) | 0.0307(16)      | 0.0149(14)      | 0.0178(14)      | -0.0018(11)     | 0.0034(12)      | -0.0002(12)     |
| C(72) | 0.0232(15)      | 0.0157(14)      | 0.0180(14)      | -0.0012(11)     | 0.0023(11)      | 0.0003(11)      |
| C(71) | 0.0200(14)      | 0.0147(13)      | 0.0122(13)      | -0.0041(11)     | 0.0008(11)      | 0.0000(11)      |
| C(68) | 0.0293(8)       | 0.0495(12)      | 0.0328(11)      | 0.0077(10)      | -0.0028(8)      | -0.0135(8)      |
| C(78) | 0.0234(15)      | 0.0274(17)      | 0.0265(16)      | -0.0039(13)     | 0.0025(13)      | -0.0065(13)     |
| C(77) | 0.0524(11)      | 0.0292(9)       | 0.0349(9)       | 0.0080(7)       | -0.0012(8)      | 0.0000(7)       |
| C(76) | 0.0231(14)      | 0.0155(14)      | 0.0151(14)      | -0.0023(11)     | 0.0008(11)      | -0.0010(11)     |
| F(76) | 0.0305(11)      | 0.0563(13)      | 0.0608(14)      | -0.0295(11)     | -0.0109(10)     | -0.0076(9)      |
| C(75) | 0.0212(14)      | 0.0194(14)      | 0.0189(14)      | -0.0053(12)     | 0.0019(11)      | -0.0033(11)     |
| F(75) | 0.0253(10)      | 0.0595(13)      | 0.0371(11)      | 0.0045(10)      | 0.0123(8)       | -0.0012(9)      |
| C(74) | 0.0294(16)      | 0.0203(15)      | 0.0191(15)      | -0.0007(12)     | 0.0061(12)      | -0.0086(12)     |
| F(74) | 0.0215(9)       | 0.0417(12)      | 0.0571(13)      | 0.0159(10)      | -0.0022(9)      | -0.0002(8)      |
| F(81) | 0.0311(9)       | 0.0208(8)       | 0.0259(9)       | -0.0043(7)      | 0.0009(8)       | 0.0019(7)       |
| F(83) | 0.0311(9)       | 0.0208(8)       | 0.0259(9)       | -0.0043(7)      | 0.0009(8)       | 0.0019(7)       |

Continued on next page

**Table S13.** – continued from previous page

| atom  | U <sub>11</sub> | U <sub>22</sub> | U <sub>33</sub> | U <sub>23</sub> | U <sub>13</sub> | U <sub>12</sub> |
|-------|-----------------|-----------------|-----------------|-----------------|-----------------|-----------------|
| F(82) | 0.0311(9)       | 0.0208(8)       | 0.0259(9)       | -0.0043(7)      | 0.0009(8)       | 0.0019(7)       |
| F(6)  | 0.0311(9)       | 0.0208(8)       | 0.0259(9)       | -0.0043(7)      | 0.0009(8)       | 0.0019(7)       |
| F(5)  | 0.0311(9)       | 0.0208(8)       | 0.0259(9)       | -0.0043(7)      | 0.0009(8)       | 0.0019(7)       |
| F(4)  | 0.0311(9)       | 0.0208(8)       | 0.0259(9)       | -0.0043(7)      | 0.0009(8)       | 0.0019(7)       |
| F(9)  | 0.0311(9)       | 0.0208(8)       | 0.0259(9)       | -0.0043(7)      | 0.0009(8)       | 0.0019(7)       |
| F(8)  | 0.0311(9)       | 0.0208(8)       | 0.0259(9)       | -0.0043(7)      | 0.0009(8)       | 0.0019(7)       |
| F(7)  | 0.0311(9)       | 0.0208(8)       | 0.0259(9)       | -0.0043(7)      | 0.0009(8)       | 0.0019(7)       |
| C(81) | 0.0128(12)      | 0.0135(13)      | 0.0166(13)      | 0.0004(11)      | 0.0029(10)      | -0.0045(10)     |
| C(82) | 0.0158(13)      | 0.0164(13)      | 0.0147(13)      | -0.0004(11)     | -0.0003(11)     | -0.0023(11)     |
| C(83) | 0.0172(13)      | 0.0167(14)      | 0.0193(14)      | -0.0014(11)     | 0.0013(11)      | -0.0015(11)     |
| C(87) | 0.0311(9)       | 0.0208(8)       | 0.0259(9)       | -0.0043(7)      | 0.0009(8)       | 0.0019(7)       |
| C(86) | 0.0150(13)      | 0.0191(14)      | 0.0176(14)      | -0.0022(11)     | -0.0005(11)     | -0.0010(11)     |
| C(85) | 0.0146(13)      | 0.0215(15)      | 0.0212(15)      | 0.0010(12)      | -0.0011(11)     | 0.0000(11)      |
| C(84) | 0.0161(13)      | 0.0149(14)      | 0.0258(15)      | -0.0009(12)     | 0.0003(11)      | 0.0009(11)      |
| C(88) | 0.0433(12)      | 0.0386(11)      | 0.0260(8)       | 0.0000(8)       | -0.0117(8)      | 0.0086(9)       |



**Table S14.** Distances [Å] for  $[(PC(sp^2)P)^{tBu}PdI][BAR_4^F]$  (**5**).

| atom – atom    | distance  | atom – atom    | distance  |
|----------------|-----------|----------------|-----------|
| F(86) – C(88)  | 1.344(6)  | F(84) – C(88)  | 1.364(6)  |
| F(85) – C(88)  | 1.345(6)  | F(89) – C(88)  | 1.341(7)  |
| F(88) – C(88)  | 1.305(7)  | F(87) – C(88)  | 1.396(7)  |
| F(93) – C(88)  | 1.304(9)  | F(92) – C(88)  | 1.347(9)  |
| F(91) – C(88)  | 1.343(9)  | F(72) – C(77)  | 1.400(5)  |
| F(71) – C(77)  | 1.281(5)  | F(73) – C(77)  | 1.335(6)  |
| F(78) – C(77)  | 1.362(7)  | F(77) – C(77)  | 1.290(6)  |
| F(79) – C(77)  | 1.417(6)  | P(1) – C(12)   | 1.813(3)  |
| P(1) – C(32)   | 1.839(3)  | P(1) – C(31)   | 1.844(3)  |
| P(1) – Pd      | 2.3161(7) | I – Pd         | 2.6255(3) |
| P(2) – C(22)   | 1.824(3)  | P(2) – C(41)   | 1.830(3)  |
| P(2) – C(42)   | 1.838(3)  | P(2) – Pd      | 2.2884(7) |
| C(11) – C(16)  | 1.405(4)  | C(11) – C(12)  | 1.414(4)  |
| C(11) – C      | 1.442(4)  | C(10) – C(14)  | 1.528(4)  |
| C(10) – C(18)  | 1.530(4)  | C(10) – C(17)  | 1.531(5)  |
| C(10) – C(19)  | 1.534(4)  | C(12) – C(13)  | 1.383(4)  |
| C(14) – C(13)  | 1.388(4)  | C(14) – C(15)  | 1.395(4)  |
| C(13) – H(13)  | 0.9500    | C(15) – C(16)  | 1.373(4)  |
| C(15) – H(15)  | 0.9500    | C(16) – H(16)  | 0.9500    |
| C(21) – C(26)  | 1.409(4)  | C(21) – C(22)  | 1.412(4)  |
| C(21) – C      | 1.440(4)  | C(20) – C(28)  | 1.522(5)  |
| C(20) – C(24)  | 1.529(4)  | C(20) – C(29)  | 1.533(4)  |
| C(20) – C(27)  | 1.537(4)  | C(19) – H(19A) | 0.9800    |
| C(19) – H(19B) | 0.9800    | C(19) – H(19C) | 0.9800    |
| C(18) – H(18A) | 0.9800    | C(18) – H(18B) | 0.9800    |
| C(18) – H(18C) | 0.9800    | C(17) – H(17A) | 0.9800    |
| C(17) – H(17B) | 0.9800    | C(17) – H(17C) | 0.9800    |
| C(22) – C(23)  | 1.384(4)  | C(26) – C(25)  | 1.369(4)  |
| C(26) – H(26)  | 0.9500    | C(25) – C(24)  | 1.394(4)  |
| C(25) – H(25)  | 0.9500    | C(24) – C(23)  | 1.397(4)  |
| C(23) – H(23)  | 0.9500    | C(66) – C(65)  | 1.384(4)  |
| C(66) – C(61)  | 1.397(4)  | C(66) – H(66)  | 0.9500    |
| C(65) – C(64)  | 1.382(4)  | C(65) – C(68)  | 1.482(4)  |
| C(31) – C(33)  | 1.524(4)  | C(31) – C(34)  | 1.526(4)  |
| C(31) – H(31)  | 1.0000    | C(29) – H(29A) | 0.9800    |
| C(29) – H(29B) | 0.9800    | C(29) – H(29C) | 0.9800    |
| C(28) – H(28A) | 0.9800    | C(28) – H(28B) | 0.9800    |
| C(28) – H(28C) | 0.9800    | C(27) – H(27A) | 0.9800    |
| C(27) – H(27B) | 0.9800    | C(27) – H(27C) | 0.9800    |
| C(67) – F(61)  | 1.323(4)  | C(67) – F(63)  | 1.326(4)  |
| C(67) – F(62)  | 1.334(4)  | C(67) – C(63)  | 1.487(4)  |
| F(67) – C(68)  | 1.334(7)  | F(69) – C(68)  | 1.273(8)  |
| F(68) – C(68)  | 1.424(7)  | F(65) – C(68)  | 1.377(6)  |
| F(66) – C(68)  | 1.354(6)  | F(64) – C(68)  | 1.339(7)  |
| F(2) – C(68)   | 1.484(11) | F(3) – C(68)   | 1.337(11) |
| F(1) – C(68)   | 1.209(10) | C(32) – C(35)  | 1.526(4)  |
| C(32) – C(36)  | 1.527(4)  | C(32) – H(32)  | 1.0000    |
| C(33) – H(33A) | 0.9800    | C(33) – H(33B) | 0.9800    |
| C(33) – H(33C) | 0.9800    | C(34) – H(34A) | 0.9800    |
| C(34) – H(34B) | 0.9800    | C(34) – H(34C) | 0.9800    |

Continued on next page

**Table S14.** – continued from previous page

| <b>atom – atom</b> | <b>distance</b> | <b>atom – atom</b> | <b>distance</b> |
|--------------------|-----------------|--------------------|-----------------|
| C(35) – H(35A)     | 0.9800          | C(35) – H(35B)     | 0.9800          |
| C(35) – H(35C)     | 0.9800          | C(36) – H(36A)     | 0.9800          |
| C(36) – H(36B)     | 0.9800          | C(36) – H(36C)     | 0.9800          |
| B – C(71)          | 1.639(4)        | B – C(61)          | 1.641(4)        |
| B – C(51)          | 1.645(4)        | B – C(81)          | 1.646(4)        |
| C(41) – C(43)      | 1.525(4)        | C(41) – C(44)      | 1.525(4)        |
| C(41) – H(41)      | 1.0000          | C(42) – C(45)      | 1.524(4)        |
| C(42) – C(46)      | 1.525(4)        | C(42) – H(42)      | 1.0000          |
| C(43) – H(43A)     | 0.9800          | C(43) – H(43B)     | 0.9800          |
| C(43) – H(43C)     | 0.9800          | C(44) – H(44A)     | 0.9800          |
| C(44) – H(44B)     | 0.9800          | C(44) – H(44C)     | 0.9800          |
| C(45) – H(45A)     | 0.9800          | C(45) – H(45B)     | 0.9800          |
| C(45) – H(45C)     | 0.9800          | C(46) – H(46A)     | 0.9800          |
| C(46) – H(46B)     | 0.9800          | C(46) – H(46C)     | 0.9800          |
| F(51) – C(57)      | 1.327(4)        | C(51) – C(52)      | 1.393(4)        |
| C(51) – C(56)      | 1.400(4)        | C(52) – C(53)      | 1.386(4)        |
| C(52) – H(52)      | 0.9500          | F(52) – C(57)      | 1.335(4)        |
| F(53) – C(57)      | 1.332(3)        | C(53) – C(54)      | 1.376(4)        |
| C(53) – C(57)      | 1.494(4)        | F(54) – C(58)      | 1.331(4)        |
| C(54) – C(55)      | 1.382(4)        | C(54) – H(54)      | 0.9500          |
| F(55) – C(58)      | 1.333(3)        | C(55) – C(56)      | 1.389(4)        |
| C(55) – C(58)      | 1.494(4)        | C(56) – H(56)      | 0.9500          |
| F(56) – C(58)      | 1.331(3)        | C(61) – C(62)      | 1.394(4)        |
| C(62) – C(63)      | 1.389(4)        | C(62) – H(62)      | 0.9500          |
| C(63) – C(64)      | 1.380(4)        | C(64) – H(64)      | 0.9500          |
| C – Pd             | 1.968(3)        | C(73) – C(74)      | 1.378(4)        |
| C(73) – C(72)      | 1.390(4)        | C(73) – C(77)      | 1.484(4)        |
| C(72) – C(71)      | 1.396(4)        | C(72) – H(72)      | 0.9500          |
| C(71) – C(76)      | 1.398(4)        | C(78) – F(74)      | 1.329(4)        |
| C(78) – F(75)      | 1.333(3)        | C(78) – F(76)      | 1.341(3)        |
| C(78) – C(75)      | 1.491(4)        | C(76) – C(75)      | 1.388(4)        |
| C(76) – H(76)      | 0.9500          | C(75) – C(74)      | 1.379(4)        |
| C(74) – H(74)      | 0.9500          | F(81) – C(87)      | 1.344(7)        |
| F(83) – C(87)      | 1.409(7)        | F(82) – C(87)      | 1.363(7)        |
| F(6) – C(87)       | 1.305(11)       | F(5) – C(87)       | 1.342(12)       |
| F(4) – C(87)       | 1.340(11)       | F(9) – C(87)       | 1.377(9)        |
| F(8) – C(87)       | 1.348(10)       | F(7) – C(87)       | 1.266(9)        |
| C(81) – C(86)      | 1.397(4)        | C(81) – C(82)      | 1.399(4)        |
| C(82) – C(83)      | 1.383(4)        | C(82) – H(82)      | 0.9500          |
| C(83) – C(84)      | 1.387(4)        | C(83) – C(87)      | 1.487(4)        |
| C(86) – C(85)      | 1.389(4)        | C(86) – H(86)      | 0.9500          |
| C(85) – C(84)      | 1.382(4)        | C(85) – C(88)      | 1.486(4)        |
| C(84) – H(84)      | 0.9500          |                    |                 |

**Table S15.** Angles [°] for  $[\{\text{PC}(\text{sp}^2)\text{P}\}^{\text{tBu}}\text{PdI}][\text{BAR}_4^{\text{F}}]$  (5).

| atom – atom – atom      | angle      | atom – atom – atom      | angle      |
|-------------------------|------------|-------------------------|------------|
| C(12) – P(1) – C(32)    | 104.36(13) | C(12) – P(1) – C(31)    | 106.90(13) |
| C(32) – P(1) – C(31)    | 107.08(13) | C(12) – P(1) – Pd       | 97.87(9)   |
| C(32) – P(1) – Pd       | 124.83(9)  | C(31) – P(1) – Pd       | 113.59(10) |
| C(22) – P(2) – C(41)    | 108.05(13) | C(22) – P(2) – C(42)    | 103.87(13) |
| C(41) – P(2) – C(42)    | 108.67(14) | C(22) – P(2) – Pd       | 100.62(9)  |
| C(41) – P(2) – Pd       | 114.61(10) | C(42) – P(2) – Pd       | 119.54(10) |
| C(16) – C(11) – C(12)   | 117.9(3)   | C(16) – C(11) – C       | 124.4(2)   |
| C(12) – C(11) – C       | 117.5(2)   | C(14) – C(10) – C(18)   | 110.4(3)   |
| C(14) – C(10) – C(17)   | 112.5(2)   | C(18) – C(10) – C(17)   | 108.2(3)   |
| C(14) – C(10) – C(19)   | 107.1(2)   | C(18) – C(10) – C(19)   | 110.4(3)   |
| C(17) – C(10) – C(19)   | 108.2(3)   | C(13) – C(12) – C(11)   | 120.2(2)   |
| C(13) – C(12) – P(1)    | 125.5(2)   | C(11) – C(12) – P(1)    | 114.2(2)   |
| C(13) – C(14) – C(15)   | 117.7(3)   | C(13) – C(14) – C(10)   | 121.9(3)   |
| C(15) – C(14) – C(10)   | 120.3(3)   | C(12) – C(13) – C(14)   | 121.6(3)   |
| C(12) – C(13) – H(13)   | 119.2      | C(14) – C(13) – H(13)   | 119.2      |
| C(16) – C(15) – C(14)   | 121.9(3)   | C(16) – C(15) – H(15)   | 119.0      |
| C(14) – C(15) – H(15)   | 119.0      | C(15) – C(16) – C(11)   | 120.4(3)   |
| C(15) – C(16) – H(16)   | 119.8      | C(11) – C(16) – H(16)   | 119.8      |
| C(26) – C(21) – C(22)   | 117.8(2)   | C(26) – C(21) – C       | 124.2(3)   |
| C(22) – C(21) – C       | 118.0(2)   | C(28) – C(20) – C(24)   | 112.2(2)   |
| C(28) – C(20) – C(29)   | 108.8(3)   | C(24) – C(20) – C(29)   | 111.4(3)   |
| C(28) – C(20) – C(27)   | 109.0(3)   | C(24) – C(20) – C(27)   | 107.0(2)   |
| C(29) – C(20) – C(27)   | 108.4(2)   | C(10) – C(19) – H(19A)  | 109.5      |
| C(10) – C(19) – H(19B)  | 109.5      | H(19A) – C(19) – H(19B) | 109.5      |
| C(10) – C(19) – H(19C)  | 109.5      | H(19A) – C(19) – H(19C) | 109.5      |
| H(19B) – C(19) – H(19C) | 109.5      | C(10) – C(18) – H(18A)  | 109.5      |
| C(10) – C(18) – H(18B)  | 109.5      | H(18A) – C(18) – H(18B) | 109.5      |
| C(10) – C(18) – H(18C)  | 109.5      | H(18A) – C(18) – H(18C) | 109.5      |
| H(18B) – C(18) – H(18C) | 109.5      | C(10) – C(17) – H(17A)  | 109.5      |
| C(10) – C(17) – H(17B)  | 109.5      | H(17A) – C(17) – H(17B) | 109.5      |
| C(10) – C(17) – H(17C)  | 109.5      | H(17A) – C(17) – H(17C) | 109.5      |
| H(17B) – C(17) – H(17C) | 109.5      | C(23) – C(22) – C(21)   | 120.6(3)   |
| C(23) – C(22) – P(2)    | 125.8(2)   | C(21) – C(22) – P(2)    | 113.6(2)   |
| C(25) – C(26) – C(21)   | 120.4(3)   | C(25) – C(26) – H(26)   | 119.8      |
| C(21) – C(26) – H(26)   | 119.8      | C(26) – C(25) – C(24)   | 122.2(3)   |
| C(26) – C(25) – H(25)   | 118.9      | C(24) – C(25) – H(25)   | 118.9      |
| C(25) – C(24) – C(23)   | 117.7(3)   | C(25) – C(24) – C(20)   | 120.1(3)   |
| C(23) – C(24) – C(20)   | 122.1(3)   | C(22) – C(23) – C(24)   | 121.2(3)   |
| C(22) – C(23) – H(23)   | 119.4      | C(24) – C(23) – H(23)   | 119.4      |
| C(65) – C(66) – C(61)   | 122.2(3)   | C(65) – C(66) – H(66)   | 118.9      |
| C(61) – C(66) – H(66)   | 118.9      | C(64) – C(65) – C(66)   | 121.1(3)   |
| C(64) – C(65) – C(68)   | 118.4(3)   | C(66) – C(65) – C(68)   | 120.5(3)   |
| C(33) – C(31) – C(34)   | 110.9(3)   | C(33) – C(31) – P(1)    | 110.4(2)   |
| C(34) – C(31) – P(1)    | 113.4(2)   | C(33) – C(31) – H(31)   | 107.3      |
| C(34) – C(31) – H(31)   | 107.3      | P(1) – C(31) – H(31)    | 107.3      |
| C(20) – C(29) – H(29A)  | 109.5      | C(20) – C(29) – H(29B)  | 109.5      |
| H(29A) – C(29) – H(29B) | 109.5      | C(20) – C(29) – H(29C)  | 109.5      |
| H(29A) – C(29) – H(29C) | 109.5      | H(29B) – C(29) – H(29C) | 109.5      |
| C(20) – C(28) – H(28A)  | 109.5      | C(20) – C(28) – H(28B)  | 109.5      |
| H(28A) – C(28) – H(28B) | 109.5      | C(20) – C(28) – H(28C)  | 109.5      |

Continued on next page

**Table S15.** – continued from previous page

| <b>atom – atom – atom</b> | <b>angle</b> | <b>atom – atom – atom</b> | <b>angle</b> |
|---------------------------|--------------|---------------------------|--------------|
| H(28A) – C(28) – H(28C)   | 109.5        | H(28B) – C(28) – H(28C)   | 109.5        |
| C(20) – C(27) – H(27A)    | 109.5        | C(20) – C(27) – H(27B)    | 109.5        |
| H(27A) – C(27) – H(27B)   | 109.5        | C(20) – C(27) – H(27C)    | 109.5        |
| H(27A) – C(27) – H(27C)   | 109.5        | H(27B) – C(27) – H(27C)   | 109.5        |
| F(61) – C(67) – F(63)     | 107.3(3)     | F(61) – C(67) – F(62)     | 105.4(3)     |
| F(63) – C(67) – F(62)     | 104.7(3)     | F(61) – C(67) – C(63)     | 113.0(3)     |
| F(63) – C(67) – C(63)     | 113.5(3)     | F(62) – C(67) – C(63)     | 112.2(3)     |
| C(35) – C(32) – C(36)     | 111.7(2)     | C(35) – C(32) – P(1)      | 110.31(19)   |
| C(36) – C(32) – P(1)      | 111.33(19)   | C(35) – C(32) – H(32)     | 107.8        |
| C(36) – C(32) – H(32)     | 107.8        | P(1) – C(32) – H(32)      | 107.8        |
| C(31) – C(33) – H(33A)    | 109.5        | C(31) – C(33) – H(33B)    | 109.5        |
| H(33A) – C(33) – H(33B)   | 109.5        | C(31) – C(33) – H(33C)    | 109.5        |
| H(33A) – C(33) – H(33C)   | 109.5        | H(33B) – C(33) – H(33C)   | 109.5        |
| C(31) – C(34) – H(34A)    | 109.5        | C(31) – C(34) – H(34B)    | 109.5        |
| H(34A) – C(34) – H(34B)   | 109.5        | C(31) – C(34) – H(34C)    | 109.5        |
| H(34A) – C(34) – H(34C)   | 109.5        | H(34B) – C(34) – H(34C)   | 109.5        |
| C(32) – C(35) – H(35A)    | 109.5        | C(32) – C(35) – H(35B)    | 109.5        |
| H(35A) – C(35) – H(35B)   | 109.5        | C(32) – C(35) – H(35C)    | 109.5        |
| H(35A) – C(35) – H(35C)   | 109.5        | H(35B) – C(35) – H(35C)   | 109.5        |
| C(32) – C(36) – H(36A)    | 109.5        | C(32) – C(36) – H(36B)    | 109.5        |
| H(36A) – C(36) – H(36B)   | 109.5        | C(32) – C(36) – H(36C)    | 109.5        |
| H(36A) – C(36) – H(36C)   | 109.5        | H(36B) – C(36) – H(36C)   | 109.5        |
| C(71) – B – C(61)         | 111.2(2)     | C(71) – B – C(51)         | 109.2(2)     |
| C(61) – B – C(51)         | 108.5(2)     | C(71) – B – C(81)         | 108.2(2)     |
| C(61) – B – C(81)         | 105.8(2)     | C(51) – B – C(81)         | 113.9(2)     |
| C(43) – C(41) – C(44)     | 111.4(3)     | C(43) – C(41) – P(2)      | 109.1(2)     |
| C(44) – C(41) – P(2)      | 114.1(2)     | C(43) – C(41) – H(41)     | 107.3        |
| C(44) – C(41) – H(41)     | 107.3        | P(2) – C(41) – H(41)      | 107.3        |
| C(45) – C(42) – C(46)     | 111.4(3)     | C(45) – C(42) – P(2)      | 109.3(2)     |
| C(46) – C(42) – P(2)      | 113.7(2)     | C(45) – C(42) – H(42)     | 107.4        |
| C(46) – C(42) – H(42)     | 107.4        | P(2) – C(42) – H(42)      | 107.4        |
| C(41) – C(43) – H(43A)    | 109.5        | C(41) – C(43) – H(43B)    | 109.5        |
| H(43A) – C(43) – H(43B)   | 109.5        | C(41) – C(43) – H(43C)    | 109.5        |
| H(43A) – C(43) – H(43C)   | 109.5        | H(43B) – C(43) – H(43C)   | 109.5        |
| C(41) – C(44) – H(44A)    | 109.5        | C(41) – C(44) – H(44B)    | 109.5        |
| H(44A) – C(44) – H(44B)   | 109.5        | C(41) – C(44) – H(44C)    | 109.5        |
| H(44A) – C(44) – H(44C)   | 109.5        | H(44B) – C(44) – H(44C)   | 109.5        |
| C(42) – C(45) – H(45A)    | 109.5        | C(42) – C(45) – H(45B)    | 109.5        |
| H(45A) – C(45) – H(45B)   | 109.5        | C(42) – C(45) – H(45C)    | 109.5        |
| H(45A) – C(45) – H(45C)   | 109.5        | H(45B) – C(45) – H(45C)   | 109.5        |
| C(42) – C(46) – H(46A)    | 109.5        | C(42) – C(46) – H(46B)    | 109.5        |
| H(46A) – C(46) – H(46B)   | 109.5        | C(42) – C(46) – H(46C)    | 109.5        |
| H(46A) – C(46) – H(46C)   | 109.5        | H(46B) – C(46) – H(46C)   | 109.5        |
| C(52) – C(51) – C(56)     | 115.1(2)     | C(52) – C(51) – B         | 120.1(2)     |
| C(56) – C(51) – B         | 124.8(2)     | C(53) – C(52) – C(51)     | 122.7(3)     |
| C(53) – C(52) – H(52)     | 118.6        | C(51) – C(52) – H(52)     | 118.6        |
| C(54) – C(53) – C(52)     | 121.1(3)     | C(54) – C(53) – C(57)     | 120.7(3)     |
| C(52) – C(53) – C(57)     | 118.1(3)     | C(53) – C(54) – C(55)     | 117.6(3)     |
| C(53) – C(54) – H(54)     | 121.2        | C(55) – C(54) – H(54)     | 121.2        |
| C(54) – C(55) – C(56)     | 121.0(3)     | C(54) – C(55) – C(58)     | 118.7(3)     |
| C(56) – C(55) – C(58)     | 120.1(3)     | F(51) – C(57) – F(53)     | 106.4(2)     |

Continued on next page

**Table S15.** – continued from previous page

| <b>atom – atom – atom</b> | <b>angle</b> | <b>atom – atom – atom</b> | <b>angle</b> |
|---------------------------|--------------|---------------------------|--------------|
| F(51) – C(57) – F(52)     | 105.6(3)     | F(53) – C(57) – F(52)     | 105.7(2)     |
| F(51) – C(57) – C(53)     | 111.7(2)     | F(53) – C(57) – C(53)     | 113.8(3)     |
| F(52) – C(57) – C(53)     | 113.0(2)     | C(55) – C(56) – C(51)     | 122.3(3)     |
| C(55) – C(56) – H(56)     | 118.8        | C(51) – C(56) – H(56)     | 118.8        |
| F(54) – C(58) – F(56)     | 106.9(3)     | F(54) – C(58) – F(55)     | 105.7(2)     |
| F(56) – C(58) – F(55)     | 104.6(2)     | F(54) – C(58) – C(55)     | 113.2(2)     |
| F(56) – C(58) – C(55)     | 113.6(2)     | F(55) – C(58) – C(55)     | 112.2(2)     |
| C(62) – C(61) – C(66)     | 115.5(2)     | C(62) – C(61) – B         | 123.3(2)     |
| C(66) – C(61) – B         | 120.7(2)     | C(63) – C(62) – C(61)     | 122.6(3)     |
| C(63) – C(62) – H(62)     | 118.7        | C(61) – C(62) – H(62)     | 118.7        |
| C(64) – C(63) – C(62)     | 120.7(3)     | C(64) – C(63) – C(67)     | 120.3(3)     |
| C(62) – C(63) – C(67)     | 119.0(3)     | C(63) – C(64) – C(65)     | 117.9(3)     |
| C(63) – C(64) – H(64)     | 121.0        | C(65) – C(64) – H(64)     | 121.0        |
| C(21) – C – C(11)         | 120.9(2)     | C(21) – C – Pd            | 121.2(2)     |
| C(11) – C – Pd            | 117.59(19)   | C – Pd – P(2)             | 83.52(8)     |
| C – Pd – P(1)             | 83.03(8)     | P(2) – Pd – P(1)          | 164.98(3)    |
| C – Pd – I                | 168.44(7)    | P(2) – Pd – I             | 93.767(19)   |
| P(1) – Pd – I             | 100.717(19)  | C(74) – C(73) – C(72)     | 120.4(3)     |
| C(74) – C(73) – C(77)     | 120.8(3)     | C(72) – C(73) – C(77)     | 118.8(3)     |
| C(73) – C(72) – C(71)     | 122.6(3)     | C(73) – C(72) – H(72)     | 118.7        |
| C(71) – C(72) – H(72)     | 118.7        | C(72) – C(71) – C(76)     | 115.6(2)     |
| C(72) – C(71) – B         | 122.5(2)     | C(76) – C(71) – B         | 121.9(2)     |
| F(1) – C(68) – F(69)      | 126.2(6)     | F(69) – C(68) – F(67)     | 110.0(5)     |
| F(1) – C(68) – F(3)       | 110.6(7)     | F(69) – C(68) – F(3)      | 51.8(5)      |
| F(67) – C(68) – F(3)      | 130.6(6)     | F(1) – C(68) – F(64)      | 124.9(6)     |
| F(67) – C(68) – F(64)     | 126.4(4)     | F(1) – C(68) – F(66)      | 65.4(6)      |
| F(69) – C(68) – F(66)     | 85.0(4)      | F(3) – C(68) – F(66)      | 124.9(6)     |
| F(64) – C(68) – F(66)     | 107.5(4)     | F(69) – C(68) – F(65)     | 125.2(4)     |
| F(67) – C(68) – F(65)     | 75.3(4)      | F(3) – C(68) – F(65)      | 82.6(6)      |
| F(64) – C(68) – F(65)     | 106.5(4)     | F(66) – C(68) – F(65)     | 102.8(4)     |
| F(1) – C(68) – F(68)      | 65.9(7)      | F(69) – C(68) – F(68)     | 105.3(4)     |
| F(67) – C(68) – F(68)     | 101.8(5)     | F(3) – C(68) – F(68)      | 56.0(6)      |
| F(64) – C(68) – F(68)     | 81.8(4)      | F(66) – C(68) – F(68)     | 125.5(4)     |
| F(1) – C(68) – C(65)      | 118.0(5)     | F(69) – C(68) – C(65)     | 114.9(4)     |
| F(67) – C(68) – C(65)     | 114.5(4)     | F(3) – C(68) – C(65)      | 114.6(5)     |
| F(64) – C(68) – C(65)     | 114.3(3)     | F(66) – C(68) – C(65)     | 114.1(3)     |
| F(65) – C(68) – C(65)     | 110.7(3)     | F(68) – C(68) – C(65)     | 109.2(3)     |
| F(1) – C(68) – F(2)       | 106.1(7)     | F(69) – C(68) – F(2)      | 48.0(5)      |
| F(67) – C(68) – F(2)      | 72.5(5)      | F(3) – C(68) – F(2)       | 99.0(7)      |
| F(64) – C(68) – F(2)      | 73.7(5)      | F(65) – C(68) – F(2)      | 138.3(5)     |
| F(68) – C(68) – F(2)      | 142.7(5)     | C(65) – C(68) – F(2)      | 106.4(4)     |
| F(74) – C(78) – F(75)     | 106.2(2)     | F(74) – C(78) – F(76)     | 106.3(3)     |
| F(75) – C(78) – F(76)     | 105.6(2)     | F(74) – C(78) – C(75)     | 113.7(2)     |
| F(75) – C(78) – C(75)     | 112.2(3)     | F(76) – C(78) – C(75)     | 112.3(2)     |
| F(71) – C(77) – F(77)     | 80.9(3)      | F(71) – C(77) – F(73)     | 108.8(4)     |
| F(77) – C(77) – F(73)     | 119.6(4)     | F(71) – C(77) – F(78)     | 123.0(4)     |
| F(77) – C(77) – F(78)     | 107.3(4)     | F(71) – C(77) – F(72)     | 106.8(3)     |
| F(73) – C(77) – F(72)     | 103.8(3)     | F(78) – C(77) – F(72)     | 87.2(3)      |
| F(77) – C(77) – F(79)     | 107.4(4)     | F(73) – C(77) – F(79)     | 84.3(3)      |
| F(78) – C(77) – F(79)     | 101.7(4)     | F(72) – C(77) – F(79)     | 130.3(4)     |
| F(71) – C(77) – C(73)     | 113.4(3)     | F(77) – C(77) – C(73)     | 116.1(4)     |

Continued on next page

**Table S15.** – continued from previous page

| <b>atom – atom – atom</b> | <b>angle</b> | <b>atom – atom – atom</b> | <b>angle</b> |
|---------------------------|--------------|---------------------------|--------------|
| F(73) – C(77) – C(73)     | 113.4(3)     | F(78) – C(77) – C(73)     | 112.3(4)     |
| F(72) – C(77) – C(73)     | 110.1(3)     | F(79) – C(77) – C(73)     | 111.0(3)     |
| C(75) – C(76) – C(71)     | 121.9(3)     | C(75) – C(76) – H(76)     | 119.1        |
| C(71) – C(76) – H(76)     | 119.1        | C(74) – C(75) – C(76)     | 121.1(3)     |
| C(74) – C(75) – C(78)     | 118.7(3)     | C(76) – C(75) – C(78)     | 120.2(3)     |
| C(73) – C(74) – C(75)     | 118.4(3)     | C(73) – C(74) – H(74)     | 120.8        |
| C(75) – C(74) – H(74)     | 120.8        | C(86) – C(81) – C(82)     | 115.1(2)     |
| C(86) – C(81) – B         | 124.6(2)     | C(82) – C(81) – B         | 120.2(2)     |
| C(83) – C(82) – C(81)     | 123.0(2)     | C(83) – C(82) – H(82)     | 118.5        |
| C(81) – C(82) – H(82)     | 118.5        | C(82) – C(83) – C(84)     | 120.5(3)     |
| C(82) – C(83) – C(87)     | 120.5(2)     | C(84) – C(83) – C(87)     | 119.0(2)     |
| F(7) – C(87) – F(4)       | 72.8(6)      | F(6) – C(87) – F(4)       | 99.0(7)      |
| F(7) – C(87) – F(5)       | 127.8(6)     | F(6) – C(87) – F(5)       | 104.0(6)     |
| F(4) – C(87) – F(5)       | 109.9(6)     | F(7) – C(87) – F(81)      | 89.7(4)      |
| F(6) – C(87) – F(81)      | 111.8(7)     | F(5) – C(87) – F(81)      | 92.0(5)      |
| F(7) – C(87) – F(8)       | 102.8(5)     | F(6) – C(87) – F(8)       | 73.7(6)      |
| F(4) – C(87) – F(8)       | 130.3(6)     | F(81) – C(87) – F(8)      | 117.9(5)     |
| F(7) – C(87) – F(82)      | 116.3(5)     | F(6) – C(87) – F(82)      | 89.2(5)      |
| F(4) – C(87) – F(82)      | 121.5(5)     | F(81) – C(87) – F(82)     | 105.6(4)     |
| F(7) – C(87) – F(9)       | 106.7(5)     | F(6) – C(87) – F(9)       | 124.7(7)     |
| F(5) – C(87) – F(9)       | 76.7(6)      | F(8) – C(87) – F(9)       | 106.9(5)     |
| F(82) – C(87) – F(9)      | 92.1(5)      | F(4) – C(87) – F(83)      | 91.8(5)      |
| F(5) – C(87) – F(83)      | 121.9(5)     | F(81) – C(87) – F(83)     | 108.4(4)     |
| F(8) – C(87) – F(83)      | 90.9(4)      | F(82) – C(87) – F(83)     | 106.9(3)     |
| F(9) – C(87) – F(83)      | 125.0(4)     | F(7) – C(87) – C(83)      | 115.1(5)     |
| F(6) – C(87) – C(83)      | 119.0(6)     | F(4) – C(87) – C(83)      | 112.7(5)     |
| F(5) – C(87) – C(83)      | 111.2(5)     | F(81) – C(87) – C(83)     | 114.9(3)     |
| F(8) – C(87) – C(83)      | 113.5(4)     | F(82) – C(87) – C(83)     | 112.8(4)     |
| F(9) – C(87) – C(83)      | 111.1(4)     | F(83) – C(87) – C(83)     | 107.9(3)     |
| C(85) – C(86) – C(81)     | 122.5(3)     | C(85) – C(86) – H(86)     | 118.7        |
| C(81) – C(86) – H(86)     | 118.7        | C(84) – C(85) – C(86)     | 120.8(3)     |
| C(84) – C(85) – C(88)     | 119.5(3)     | C(86) – C(85) – C(88)     | 119.7(3)     |
| C(85) – C(84) – C(83)     | 118.0(3)     | C(85) – C(84) – H(84)     | 121.0        |
| C(83) – C(84) – H(84)     | 121.0        | F(93) – C(88) – F(88)     | 127.8(5)     |
| F(93) – C(88) – F(89)     | 69.2(5)      | F(88) – C(88) – F(89)     | 109.8(5)     |
| F(93) – C(88) – F(91)     | 106.9(6)     | F(88) – C(88) – F(91)     | 78.0(5)      |
| F(93) – C(88) – F(86)     | 72.4(5)      | F(88) – C(88) – F(86)     | 70.0(4)      |
| F(89) – C(88) – F(86)     | 128.5(4)     | F(91) – C(88) – F(86)     | 135.5(4)     |
| F(88) – C(88) – F(85)     | 125.5(4)     | F(91) – C(88) – F(85)     | 70.4(5)      |
| F(86) – C(88) – F(85)     | 104.3(4)     | F(93) – C(88) – F(92)     | 108.4(6)     |
| F(89) – C(88) – F(92)     | 132.3(5)     | F(91) – C(88) – F(92)     | 109.2(6)     |
| F(85) – C(88) – F(92)     | 129.1(5)     | F(93) – C(88) – F(84)     | 131.1(5)     |
| F(89) – C(88) – F(84)     | 78.0(4)      | F(86) – C(88) – F(84)     | 104.3(4)     |
| F(85) – C(88) – F(84)     | 104.2(4)     | F(92) – C(88) – F(84)     | 69.3(5)      |
| F(88) – C(88) – F(87)     | 106.3(5)     | F(89) – C(88) – F(87)     | 102.7(5)     |
| F(91) – C(88) – F(87)     | 135.4(5)     | F(85) – C(88) – F(87)     | 71.9(4)      |
| F(92) – C(88) – F(87)     | 77.8(5)      | F(84) – C(88) – F(87)     | 133.1(4)     |
| F(93) – C(88) – C(85)     | 111.9(4)     | F(88) – C(88) – C(85)     | 115.6(4)     |
| F(89) – C(88) – C(85)     | 112.3(4)     | F(91) – C(88) – C(85)     | 108.1(4)     |
| F(86) – C(88) – C(85)     | 113.2(3)     | F(85) – C(88) – C(85)     | 116.0(3)     |
| F(92) – C(88) – C(85)     | 112.2(4)     | F(84) – C(88) – C(85)     | 113.7(3)     |

Continued on next page

**Table S15.** – continued from previous page

| <b>atom – atom – atom</b> | <b>angle</b> | <b>atom – atom – atom</b> | <b>angle</b> |
|---------------------------|--------------|---------------------------|--------------|
| F(87) – C(88) – C(85)     | 109.2(3)     |                           |              |

5.3 Crystal data for  $[[\text{PC}(\text{sp}^3)\text{HP}]^{\text{tBu}}\text{PdI}]$  (6)

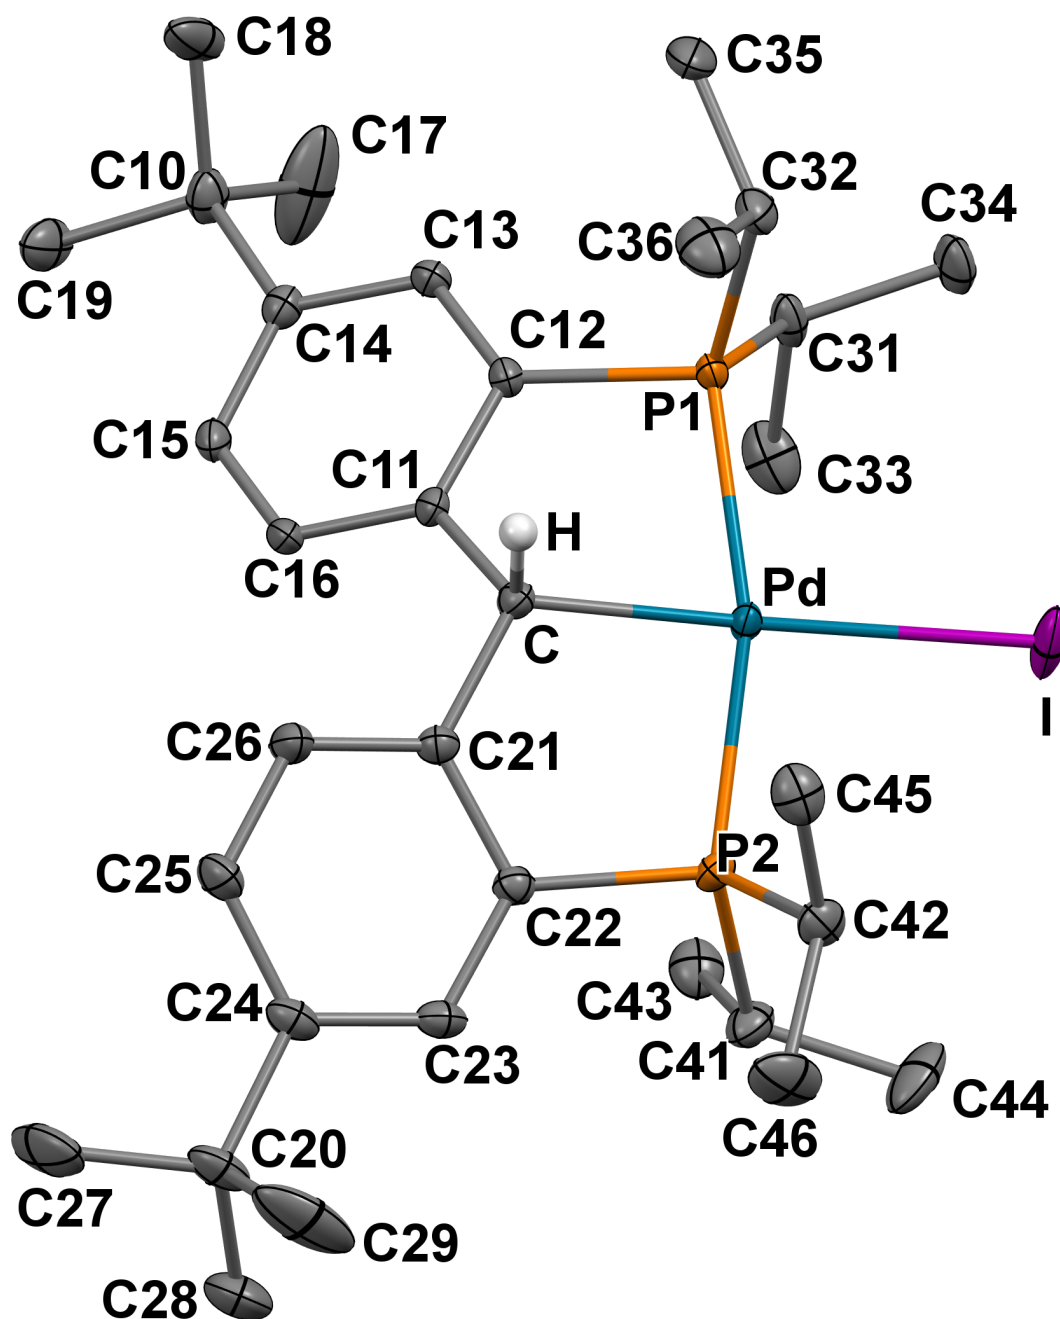

Figure S46. Thermal-ellipsoid representation of  $[[\text{PC}(\text{sp}^3)\text{HP}]^{\text{tBu}}\text{PdI}]$  (6) at 50% probability. Most hydrogen atoms were omitted for clarity.



**Table S16.** Crystal data and structure refinement for  $[\{\text{PC}(\text{sp}^3)\text{HP}\}^t\text{BuPdI}]$  (**6**).

|                                          |                                                              |                              |
|------------------------------------------|--------------------------------------------------------------|------------------------------|
| Identification code:                     | pc30                                                         |                              |
| Empirical formula:                       | $\text{C}_{33}\text{H}_{53}\text{IP}_2\text{Pd}$             |                              |
| Formula weight:                          | 744.99                                                       |                              |
| Temperature:                             | 120(2) K                                                     |                              |
| Wavelength:                              | 0.71073 Å                                                    |                              |
| Crystal system:                          | Monoclinic                                                   |                              |
| Space group:                             | $P2_1/c$                                                     |                              |
| Unit cell dimensions:                    | $a = 12.8203(13)$ Å                                          | $\alpha = 90^\circ$          |
|                                          | $b = 14.8340(15)$ Å                                          | $\beta = 106.6410(15)^\circ$ |
|                                          | $c = 19.1740(19)$ Å                                          | $\gamma = 90^\circ$          |
| Volume:                                  | $3493.7(6)$ Å <sup>3</sup>                                   |                              |
| Z:                                       | 4                                                            |                              |
| Density (calculated):                    | $1.416 \text{ g}\cdot\text{cm}^{-3}$                         |                              |
| Absorption coefficient ( $\mu$ ):        | $1.525 \text{ mm}^{-1}$                                      |                              |
| F(000):                                  | 1520                                                         |                              |
| Crystal size:                            | $0.12 \times 0.11 \times 0.09 \text{ mm}^3$                  |                              |
| $\theta$ range for data collection:      | 1.66 to $25.00^\circ$                                        |                              |
| Index ranges:                            | $-15 \leq h \leq 15, -17 \leq k \leq 17, -22 \leq l \leq 22$ |                              |
| Reflections collected:                   | 63141                                                        |                              |
| Independent reflections:                 | 6140 [ $R_{\text{int}} = 0.0317$ ]                           |                              |
| Completeness to $\theta = 25.00^\circ$ : | 99.7 %                                                       |                              |
| Absorption correction:                   | Semi-empirical from equivalents                              |                              |
| Max. and min. transmission:              | 0.8942 and 0.8032                                            |                              |
| Refinement method:                       | Full-matrix least-squares on $F^2$                           |                              |
| Data / restraints / parameters:          | 6140 / 0 / 348                                               |                              |
| Goodness-of-fit on $F^2$ :               | 1.168                                                        |                              |
| Final R indices [ $I > 2\sigma(I)$ ]:    | $R_1 = 0.0245, wR_2 = 0.0495$                                |                              |
| R indices (all data):                    | $R_1 = 0.0278, wR_2 = 0.0505$                                |                              |
| Largest diff. peak and hole:             | 1.086 and $-1.021 \text{ e}^- \cdot \text{Å}^{-3}$           |                              |

**Table S17.** Atomic coordinates and equivalent isotropic displacement parameters ( $\text{\AA}^2$ ) for  $[\{\text{PC}(\text{sp}^3)\text{HP}\}^t\text{BuPdI}]$  (**6**).  $U(\text{eq})$  is defined as one third of the trace of the orthogonalized  $U_{ij}$  tensor

| atom   | x           | y            | z            | $U(\text{eq})$ |
|--------|-------------|--------------|--------------|----------------|
| P(1)   | 0.42889(5)  | 0.14297(4)   | 0.12336(3)   | 0.018(1)       |
| P(2)   | 0.24559(6)  | 0.38154(4)   | -0.00302(4)  | 0.019(1)       |
| C(10)  | 0.1998(2)   | -0.16310(18) | 0.09453(15)  | 0.028(1)       |
| C(11)  | 0.2559(2)   | 0.10051(16)  | 0.00822(13)  | 0.018(1)       |
| C(12)  | 0.32810(19) | 0.06351(16)  | 0.07120(13)  | 0.018(1)       |
| C(13)  | 0.3098(2)   | -0.02112(17) | 0.09627(14)  | 0.020(1)       |
| C(14)  | 0.2166(2)   | -0.07127(17) | 0.06313(14)  | 0.021(1)       |
| C(15)  | 0.1426(2)   | -0.03196(17) | 0.00351(14)  | 0.023(1)       |
| C(16)  | 0.1621(2)   | 0.05099(17)  | -0.02391(14) | 0.023(1)       |
| I      | 0.45837(2)  | 0.39132(1)   | 0.17099(1)   | 0.041(1)       |
| Pd     | 0.35350(2)  | 0.27546(1)   | 0.06763(1)   | 0.017(1)       |
| C(22)  | 0.1695(2)   | 0.31944(17)  | -0.08287(14) | 0.020(1)       |
| C(21)  | 0.2041(2)   | 0.23041(17)  | -0.08501(13) | 0.021(1)       |
| C(20)  | -0.0339(2)  | 0.3547(2)    | -0.27156(16) | 0.035(1)       |
| C(19)  | 0.0939(2)   | -0.20840(19) | 0.05210(18)  | 0.036(1)       |
| C(18)  | 0.2928(2)   | -0.2257(2)   | 0.0904(2)    | 0.048(1)       |
| C(17)  | 0.1999(5)   | -0.1509(3)   | 0.1738(2)    | 0.084(2)       |
| C(23)  | 0.0919(2)   | 0.35691(18)  | -0.14234(14) | 0.024(1)       |
| C(24)  | 0.0480(2)   | 0.30948(19)  | -0.20648(14) | 0.026(1)       |
| C(25)  | 0.0872(2)   | 0.22233(19)  | -0.20927(15) | 0.029(1)       |
| C(26)  | 0.1635(2)   | 0.18379(18)  | -0.15031(14) | 0.027(1)       |
| C(27)  | -0.0878(3)  | 0.2874(3)    | -0.33105(18) | 0.062(1)       |
| C(28)  | -0.1242(3)  | 0.4012(2)    | -0.24750(19) | 0.049(1)       |
| C(29)  | 0.0261(3)   | 0.4284(3)    | -0.3015(2)   | 0.077(2)       |
| C(31)  | 0.4240(2)   | 0.12277(18)  | 0.21734(14)  | 0.027(1)       |
| C(33)  | 0.3173(3)   | 0.1609(2)    | 0.22513(16)  | 0.040(1)       |
| C(32)  | 0.5653(2)   | 0.10729(19)  | 0.12100(16)  | 0.029(1)       |
| C(34)  | 0.5230(2)   | 0.1613(2)    | 0.27462(14)  | 0.034(1)       |
| C(35)  | 0.5918(2)   | 0.0091(2)    | 0.14267(19)  | 0.039(1)       |
| C(36)  | 0.5808(3)   | 0.1272(2)    | 0.04752(18)  | 0.044(1)       |
| C(41)  | 0.1422(2)   | 0.44127(18)  | 0.02958(16)  | 0.029(1)       |
| C(42)  | 0.3240(2)   | 0.46742(18)  | -0.03598(16) | 0.028(1)       |
| C(43)  | 0.0943(2)   | 0.3754(2)    | 0.07316(17)  | 0.035(1)       |
| C(44)  | 0.1860(3)   | 0.5258(2)    | 0.0733(2)    | 0.054(1)       |
| C(45)  | 0.4121(2)   | 0.4190(2)    | -0.06081(16) | 0.033(1)       |
| C(46)  | 0.2589(3)   | 0.5316(2)    | -0.0953(2)   | 0.049(1)       |
| C      | 0.2872(2)   | 0.18880(16)  | -0.02011(13) | 0.019(1)       |
| H(13)  | 0.3623      | -0.0457      | 0.1373       | 0.024          |
| H(15)  | 0.0766      | -0.0627      | -0.0192      | 0.027          |
| H(16)  | 0.1101      | 0.0746       | -0.0657      | 0.027          |
| H(19A) | 0.0321      | -0.1707      | 0.0542       | 0.055          |
| H(19B) | 0.0880      | -0.2675      | 0.0736       | 0.055          |
| H(19C) | 0.0934      | -0.2161      | 0.0013       | 0.055          |
| H(18A) | 0.2909      | -0.2343      | 0.0393       | 0.072          |
| H(18B) | 0.2843      | -0.2842      | 0.1120       | 0.072          |
| H(18C) | 0.3626      | -0.1988      | 0.1171       | 0.072          |
| H(17A) | 0.1395      | -0.1115      | 0.1758       | 0.127          |
| H(17B) | 0.2689      | -0.1237      | 0.2016       | 0.127          |
| H(17C) | 0.1914      | -0.2098      | 0.1948       | 0.127          |

Continued on next page

**Table S17.** – continued from previous page

| atom   | x       | y       | x       | U(eq) |
|--------|---------|---------|---------|-------|
| H(23)  | 0.0684  | 0.4170  | -0.1388 | 0.029 |
| H(25)  | 0.0610  | 0.1883  | -0.2528 | 0.035 |
| H(26)  | 0.1885  | 0.1243  | -0.1546 | 0.033 |
| H(27A) | -0.1432 | 0.3183  | -0.3696 | 0.093 |
| H(27B) | -0.1223 | 0.2394  | -0.3103 | 0.093 |
| H(27C) | -0.0328 | 0.2612  | -0.3514 | 0.093 |
| H(28A) | -0.1775 | 0.4270  | -0.2901 | 0.073 |
| H(28B) | -0.0927 | 0.4494  | -0.2129 | 0.073 |
| H(28C) | -0.1602 | 0.3571  | -0.2241 | 0.073 |
| H(29A) | 0.0790  | 0.4003  | -0.3229 | 0.116 |
| H(29B) | 0.0641  | 0.4687  | -0.2619 | 0.116 |
| H(29C) | -0.0267 | 0.4632  | -0.3390 | 0.116 |
| H(31)  | 0.4233  | 0.0561  | 0.2249  | 0.032 |
| H(33A) | 0.2567  | 0.1400  | 0.1845  | 0.060 |
| H(33B) | 0.3201  | 0.2269  | 0.2248  | 0.060 |
| H(33C) | 0.3066  | 0.1403  | 0.2711  | 0.060 |
| H(32)  | 0.6190  | 0.1452  | 0.1573  | 0.035 |
| H(34A) | 0.5893  | 0.1322  | 0.2701  | 0.051 |
| H(34B) | 0.5155  | 0.1501  | 0.3233  | 0.051 |
| H(34C) | 0.5274  | 0.2264  | 0.2671  | 0.051 |
| H(35A) | 0.5369  | -0.0302 | 0.1109  | 0.059 |
| H(35B) | 0.5918  | 0.0003  | 0.1933  | 0.059 |
| H(35C) | 0.6638  | -0.0059 | 0.1377  | 0.059 |
| H(36A) | 0.5278  | 0.0927  | 0.0101  | 0.066 |
| H(36B) | 0.6547  | 0.1101  | 0.0476  | 0.066 |
| H(36C) | 0.5701  | 0.1917  | 0.0371  | 0.066 |
| H(41)  | 0.0823  | 0.4601  | -0.0141 | 0.035 |
| H(42)  | 0.3619  | 0.5054  | 0.0069  | 0.033 |
| H(43A) | 0.0328  | 0.4038  | 0.0854  | 0.053 |
| H(43B) | 0.1502  | 0.3589  | 0.1180  | 0.053 |
| H(43C) | 0.0692  | 0.3211  | 0.0441  | 0.053 |
| H(44A) | 0.2144  | 0.5672  | 0.0433  | 0.081 |
| H(44B) | 0.2445  | 0.5093  | 0.1168  | 0.081 |
| H(44C) | 0.1271  | 0.5554  | 0.0879  | 0.081 |
| H(45A) | 0.3782  | 0.3746  | -0.0982 | 0.050 |
| H(45B) | 0.4620  | 0.3884  | -0.0192 | 0.050 |
| H(45C) | 0.4526  | 0.4630  | -0.0810 | 0.050 |
| H(46A) | 0.2291  | 0.4979  | -0.1406 | 0.074 |
| H(46B) | 0.3069  | 0.5795  | -0.1032 | 0.074 |
| H(46C) | 0.1992  | 0.5583  | -0.0798 | 0.074 |
| H      | 0.3501  | 0.1730  | -0.0388 | 0.023 |

**Table S18.** Anisotropic displacement parameters ( $\text{\AA}^2$ ) for  $[\{\text{PC}(\text{sp}^3)\text{HP}\}^{\text{tBu}}\text{PdI}]$  (**6**). The anisotropic displacement factor exponent takes the form:  $-2\pi^2[h^2a^*2U_{11} + \dots + 2hka^*b^*U_{12}]$ .

| atom  | $U_{11}$   | $U_{22}$   | $U_{33}$   | $U_{23}$    | $U_{13}$    | $U_{12}$    |
|-------|------------|------------|------------|-------------|-------------|-------------|
| P(1)  | 0.0167(3)  | 0.0159(3)  | 0.0162(3)  | -0.0006(2)  | -0.0013(3)  | -0.0020(3)  |
| P(2)  | 0.0235(3)  | 0.0128(3)  | 0.0225(3)  | 0.0006(3)   | 0.0072(3)   | -0.0002(3)  |
| C(10) | 0.0334(16) | 0.0236(14) | 0.0251(14) | 0.0014(11)  | 0.0047(12)  | -0.0097(12) |
| C(11) | 0.0203(13) | 0.0146(12) | 0.0180(12) | -0.0042(10) | 0.0020(10)  | 0.0008(10)  |
| C(12) | 0.0161(13) | 0.0178(12) | 0.0175(12) | -0.0027(10) | 0.0006(10)  | -0.0005(10) |
| C(13) | 0.0205(13) | 0.0181(12) | 0.0185(13) | 0.0009(10)  | 0.0006(10)  | 0.0014(10)  |
| C(14) | 0.0232(14) | 0.0178(12) | 0.0233(13) | -0.0027(11) | 0.0076(11)  | -0.0017(11) |
| C(15) | 0.0171(13) | 0.0197(13) | 0.0282(14) | -0.0071(11) | 0.0016(11)  | -0.0021(10) |
| C(16) | 0.0206(13) | 0.0178(13) | 0.0224(13) | -0.0034(11) | -0.0047(11) | 0.0043(11)  |
| I     | 0.0739(2)  | 0.0235(1)  | 0.0193(1)  | -0.0051(1)  | 0.0025(1)   | -0.0213(1)  |
| Pd    | 0.0207(1)  | 0.0129(1)  | 0.0145(1)  | -0.0014(1)  | 0.0027(1)   | -0.0029(1)  |
| C(22) | 0.0195(13) | 0.0181(12) | 0.0214(13) | 0.0026(10)  | 0.0049(11)  | 0.0003(10)  |
| C(21) | 0.0215(13) | 0.0182(12) | 0.0205(13) | 0.0022(10)  | 0.0041(11)  | 0.0010(11)  |
| C(20) | 0.0277(16) | 0.0439(18) | 0.0277(16) | 0.0160(14)  | -0.0006(12) | 0.0082(14)  |
| C(19) | 0.0267(16) | 0.0217(14) | 0.059(2)   | 0.0047(14)  | 0.0091(14)  | -0.0075(12) |
| C(18) | 0.0297(17) | 0.0231(15) | 0.076(3)   | 0.0209(16)  | -0.0079(16) | -0.0047(13) |
| C(17) | 0.165(5)   | 0.058(3)   | 0.042(2)   | -0.0106(19) | 0.049(3)    | -0.064(3)   |
| C(23) | 0.0224(14) | 0.0214(13) | 0.0287(15) | 0.0069(11)  | 0.0070(11)  | 0.0056(11)  |
| C(24) | 0.0225(14) | 0.0314(15) | 0.0226(14) | 0.0087(12)  | 0.0040(11)  | 0.0040(12)  |
| C(25) | 0.0286(15) | 0.0326(15) | 0.0199(14) | 0.0010(12)  | -0.0020(11) | 0.0042(13)  |
| C(26) | 0.0327(16) | 0.0207(13) | 0.0225(14) | -0.0018(11) | -0.0010(12) | 0.0061(12)  |
| C(27) | 0.067(3)   | 0.075(3)   | 0.0273(18) | -0.0010(18) | -0.0149(17) | 0.035(2)    |
| C(28) | 0.0346(18) | 0.051(2)   | 0.050(2)   | 0.0084(17)  | -0.0051(16) | 0.0159(16)  |
| C(29) | 0.044(2)   | 0.109(4)   | 0.069(3)   | 0.068(3)    | 0.002(2)    | 0.006(2)    |
| C(31) | 0.0321(15) | 0.0251(14) | 0.0166(13) | 0.0032(11)  | -0.0029(11) | -0.0099(12) |
| C(33) | 0.0381(18) | 0.061(2)   | 0.0239(15) | 0.0013(15)  | 0.0131(14)  | -0.0114(16) |
| C(32) | 0.0181(14) | 0.0292(15) | 0.0352(16) | -0.0071(13) | 0.0009(12)  | -0.0014(12) |
| C(34) | 0.0418(18) | 0.0350(16) | 0.0164(14) | -0.0004(12) | -0.0053(12) | -0.0078(14) |
| C(35) | 0.0232(16) | 0.0326(16) | 0.053(2)   | -0.0084(15) | -0.0042(14) | 0.0071(13)  |
| C(36) | 0.0330(18) | 0.056(2)   | 0.0449(19) | -0.0057(16) | 0.0151(15)  | 0.0044(16)  |
| C(41) | 0.0283(15) | 0.0221(14) | 0.0394(17) | -0.0061(12) | 0.0123(13)  | 0.0023(12)  |
| C(42) | 0.0294(15) | 0.0214(14) | 0.0315(15) | 0.0056(12)  | 0.0072(12)  | -0.0046(12) |
| C(43) | 0.0295(16) | 0.0429(18) | 0.0375(17) | -0.0071(14) | 0.0153(14)  | -0.0035(14) |
| C(44) | 0.056(2)   | 0.0314(18) | 0.086(3)   | -0.0284(18) | 0.038(2)    | -0.0060(16) |
| C(45) | 0.0328(16) | 0.0394(17) | 0.0287(16) | 0.0032(13)  | 0.0113(13)  | -0.0082(13) |
| C(46) | 0.045(2)   | 0.0354(18) | 0.064(2)   | 0.0288(17)  | 0.0089(18)  | -0.0028(15) |
| C     | 0.0219(13) | 0.0158(12) | 0.0174(12) | -0.0018(10) | 0.0037(10)  | 0.0025(10)  |

**Table S19.** Distances [Å] for  $[\{\text{PC}(\text{sp}^3)\text{HP}\}^{\text{tBu}}\text{PdI}]$  (**6**).

| atom – atom    | distance  | atom – atom    | distance  |
|----------------|-----------|----------------|-----------|
| P(1) – C(12)   | 1.822(2)  | P(1) – C(32)   | 1.840(3)  |
| P(1) – C(31)   | 1.845(3)  | P(1) – Pd      | 2.3123(7) |
| P(2) – C(22)   | 1.813(3)  | P(2) – C(42)   | 1.843(3)  |
| P(2) – C(41)   | 1.846(3)  | P(2) – Pd      | 2.2698(7) |
| C(10) – C(19)  | 1.525(4)  | C(10) – C(14)  | 1.529(4)  |
| C(10) – C(17)  | 1.530(4)  | C(10) – C(18)  | 1.531(4)  |
| C(11) – C(16)  | 1.393(3)  | C(11) – C(12)  | 1.406(3)  |
| C(11) – C      | 1.516(3)  | C(12) – C(13)  | 1.388(3)  |
| C(13) – C(14)  | 1.396(4)  | C(13) – H(13)  | 0.9500    |
| C(14) – C(15)  | 1.388(4)  | C(15) – C(16)  | 1.389(4)  |
| C(15) – H(15)  | 0.9500    | C(16) – H(16)  | 0.9500    |
| I – Pd         | 2.6763(3) | Pd – C         | 2.094(2)  |
| C(22) – C(23)  | 1.396(4)  | C(22) – C(21)  | 1.397(4)  |
| C(21) – C(26)  | 1.394(4)  | C(21) – C      | 1.518(3)  |
| C(20) – C(27)  | 1.525(5)  | C(20) – C(28)  | 1.528(5)  |
| C(20) – C(24)  | 1.536(4)  | C(20) – C(29)  | 1.539(5)  |
| C(19) – H(19A) | 0.9800    | C(19) – H(19B) | 0.9800    |
| C(19) – H(19C) | 0.9800    | C(18) – H(18A) | 0.9800    |
| C(18) – H(18B) | 0.9800    | C(18) – H(18C) | 0.9800    |
| C(17) – H(17A) | 0.9800    | C(17) – H(17B) | 0.9800    |
| C(17) – H(17C) | 0.9800    | C(23) – C(24)  | 1.389(4)  |
| C(23) – H(23)  | 0.9500    | C(24) – C(25)  | 1.394(4)  |
| C(25) – C(26)  | 1.388(4)  | C(25) – H(25)  | 0.9500    |
| C(26) – H(26)  | 0.9500    | C(27) – H(27A) | 0.9800    |
| C(27) – H(27B) | 0.9800    | C(27) – H(27C) | 0.9800    |
| C(28) – H(28A) | 0.9800    | C(28) – H(28B) | 0.9800    |
| C(28) – H(28C) | 0.9800    | C(29) – H(29A) | 0.9800    |
| C(29) – H(29B) | 0.9800    | C(29) – H(29C) | 0.9800    |
| C(31) – C(33)  | 1.527(4)  | C(31) – C(34)  | 1.531(4)  |
| C(31) – H(31)  | 1.0000    | C(33) – H(33A) | 0.9800    |
| C(33) – H(33B) | 0.9800    | C(33) – H(33C) | 0.9800    |
| C(32) – C(36)  | 1.507(4)  | C(32) – C(35)  | 1.526(4)  |
| C(32) – H(32)  | 1.0000    | C(34) – H(34A) | 0.9800    |
| C(34) – H(34B) | 0.9800    | C(34) – H(34C) | 0.9800    |
| C(35) – H(35A) | 0.9800    | C(35) – H(35B) | 0.9800    |
| C(35) – H(35C) | 0.9800    | C(36) – H(36A) | 0.9800    |
| C(36) – H(36B) | 0.9800    | C(36) – H(36C) | 0.9800    |
| C(41) – C(44)  | 1.523(4)  | C(41) – C(43)  | 1.525(4)  |
| C(41) – H(41)  | 1.0000    | C(42) – C(45)  | 1.525(4)  |
| C(42) – C(46)  | 1.533(4)  | C(42) – H(42)  | 1.0000    |
| C(43) – H(43A) | 0.9800    | C(43) – H(43B) | 0.9800    |
| C(43) – H(43C) | 0.9800    | C(44) – H(44A) | 0.9800    |
| C(44) – H(44B) | 0.9800    | C(44) – H(44C) | 0.9800    |
| C(45) – H(45A) | 0.9800    | C(45) – H(45B) | 0.9800    |
| C(45) – H(45C) | 0.9800    | C(46) – H(46A) | 0.9800    |
| C(46) – H(46B) | 0.9800    | C(46) – H(46C) | 0.9800    |
| C – H          | 1.0000    |                |           |

**Table S20.** Angles [°] for  $[\{\text{PC}(\text{sp}^3)\text{HP}\}^t\text{BuPdI}]$  (**6**).

| atom – atom – atom      | angle      | atom – atom – atom      | angle      |
|-------------------------|------------|-------------------------|------------|
| C(12) – P(1) – C(32)    | 109.27(12) | C(12) – P(1) – C(31)    | 102.36(12) |
| C(32) – P(1) – C(31)    | 105.98(13) | C(12) – P(1) – Pd       | 99.17(8)   |
| C(32) – P(1) – Pd       | 120.50(10) | C(31) – P(1) – Pd       | 117.56(10) |
| C(22) – P(2) – C(42)    | 106.02(12) | C(22) – P(2) – C(41)    | 105.37(13) |
| C(42) – P(2) – C(41)    | 107.41(13) | C(22) – P(2) – Pd       | 103.90(8)  |
| C(42) – P(2) – Pd       | 112.64(9)  | C(41) – P(2) – Pd       | 120.31(10) |
| C(19) – C(10) – C(14)   | 112.8(2)   | C(19) – C(10) – C(17)   | 109.2(3)   |
| C(14) – C(10) – C(17)   | 109.0(2)   | C(19) – C(10) – C(18)   | 107.0(2)   |
| C(14) – C(10) – C(18)   | 108.7(2)   | C(17) – C(10) – C(18)   | 110.1(3)   |
| C(16) – C(11) – C(12)   | 116.5(2)   | C(16) – C(11) – C       | 125.5(2)   |
| C(12) – C(11) – C       | 117.9(2)   | C(13) – C(12) – C(11)   | 121.0(2)   |
| C(13) – C(12) – P(1)    | 123.98(19) | C(11) – C(12) – P(1)    | 114.09(18) |
| C(12) – C(13) – C(14)   | 122.1(2)   | C(12) – C(13) – H(13)   | 118.9      |
| C(14) – C(13) – H(13)   | 118.9      | C(15) – C(14) – C(13)   | 116.4(2)   |
| C(15) – C(14) – C(10)   | 123.9(2)   | C(13) – C(14) – C(10)   | 119.6(2)   |
| C(14) – C(15) – C(16)   | 122.0(2)   | C(14) – C(15) – H(15)   | 119.0      |
| C(16) – C(15) – H(15)   | 119.0      | C(15) – C(16) – C(11)   | 121.7(2)   |
| C(15) – C(16) – H(16)   | 119.1      | C(11) – C(16) – H(16)   | 119.1      |
| C – Pd – P(2)           | 84.74(7)   | C – Pd – P(1)           | 82.49(7)   |
| P(2) – Pd – P(1)        | 165.40(2)  | C – Pd – I              | 172.41(7)  |
| P(2) – Pd – I           | 95.04(2)   | P(1) – Pd – I           | 98.557(18) |
| C(23) – C(22) – C(21)   | 120.7(2)   | C(23) – C(22) – P(2)    | 124.9(2)   |
| C(21) – C(22) – P(2)    | 113.96(18) | C(26) – C(21) – C(22)   | 117.0(2)   |
| C(26) – C(21) – C       | 121.9(2)   | C(22) – C(21) – C       | 121.0(2)   |
| C(27) – C(20) – C(28)   | 107.5(3)   | C(27) – C(20) – C(24)   | 112.3(3)   |
| C(28) – C(20) – C(24)   | 110.6(2)   | C(27) – C(20) – C(29)   | 110.7(3)   |
| C(28) – C(20) – C(29)   | 107.1(3)   | C(24) – C(20) – C(29)   | 108.4(2)   |
| C(10) – C(19) – H(19A)  | 109.5      | C(10) – C(19) – H(19B)  | 109.5      |
| H(19A) – C(19) – H(19B) | 109.5      | C(10) – C(19) – H(19C)  | 109.5      |
| H(19A) – C(19) – H(19C) | 109.5      | H(19B) – C(19) – H(19C) | 109.5      |
| C(10) – C(18) – H(18A)  | 109.5      | C(10) – C(18) – H(18B)  | 109.5      |
| H(18A) – C(18) – H(18B) | 109.5      | C(10) – C(18) – H(18C)  | 109.5      |
| H(18A) – C(18) – H(18C) | 109.5      | H(18B) – C(18) – H(18C) | 109.5      |
| C(10) – C(17) – H(17A)  | 109.5      | C(10) – C(17) – H(17B)  | 109.5      |
| H(17A) – C(17) – H(17B) | 109.5      | C(10) – C(17) – H(17C)  | 109.5      |
| H(17A) – C(17) – H(17C) | 109.5      | H(17B) – C(17) – H(17C) | 109.5      |
| C(24) – C(23) – C(22)   | 122.3(2)   | C(24) – C(23) – H(23)   | 118.8      |
| C(22) – C(23) – H(23)   | 118.8      | C(23) – C(24) – C(25)   | 116.4(2)   |
| C(23) – C(24) – C(20)   | 120.5(3)   | C(25) – C(24) – C(20)   | 123.0(3)   |
| C(26) – C(25) – C(24)   | 121.9(3)   | C(26) – C(25) – H(25)   | 119.1      |
| C(24) – C(25) – H(25)   | 119.1      | C(25) – C(26) – C(21)   | 121.5(2)   |
| C(25) – C(26) – H(26)   | 119.3      | C(21) – C(26) – H(26)   | 119.3      |
| C(20) – C(27) – H(27A)  | 109.5      | C(20) – C(27) – H(27B)  | 109.5      |
| H(27A) – C(27) – H(27B) | 109.5      | C(20) – C(27) – H(27C)  | 109.5      |
| H(27A) – C(27) – H(27C) | 109.5      | H(27B) – C(27) – H(27C) | 109.5      |
| C(20) – C(28) – H(28A)  | 109.5      | C(20) – C(28) – H(28B)  | 109.5      |
| H(28A) – C(28) – H(28B) | 109.5      | C(20) – C(28) – H(28C)  | 109.5      |
| H(28A) – C(28) – H(28C) | 109.5      | H(28B) – C(28) – H(28C) | 109.5      |
| C(20) – C(29) – H(29A)  | 109.5      | C(20) – C(29) – H(29B)  | 109.5      |
| H(29A) – C(29) – H(29B) | 109.5      | C(20) – C(29) – H(29C)  | 109.5      |

Continued on next page

**Table S20.** – continued from previous page

| <b>atom – atom – atom</b> | <b>angle</b> | <b>atom – atom – atom</b> | <b>angle</b> |
|---------------------------|--------------|---------------------------|--------------|
| H(29A) – C(29) – H(29C)   | 109.5        | H(29B) – C(29) – H(29C)   | 109.5        |
| C(33) – C(31) – C(34)     | 111.9(2)     | C(33) – C(31) – P(1)      | 108.49(18)   |
| C(34) – C(31) – P(1)      | 112.78(19)   | C(33) – C(31) – H(31)     | 107.8        |
| C(34) – C(31) – H(31)     | 107.8        | P(1) – C(31) – H(31)      | 107.8        |
| C(31) – C(33) – H(33A)    | 109.5        | C(31) – C(33) – H(33B)    | 109.5        |
| H(33A) – C(33) – H(33B)   | 109.5        | C(31) – C(33) – H(33C)    | 109.5        |
| H(33A) – C(33) – H(33C)   | 109.5        | H(33B) – C(33) – H(33C)   | 109.5        |
| C(36) – C(32) – C(35)     | 111.2(3)     | C(36) – C(32) – P(1)      | 110.3(2)     |
| C(35) – C(32) – P(1)      | 114.0(2)     | C(36) – C(32) – H(32)     | 106.9        |
| C(35) – C(32) – H(32)     | 106.9        | P(1) – C(32) – H(32)      | 106.9        |
| C(31) – C(34) – H(34A)    | 109.5        | C(31) – C(34) – H(34B)    | 109.5        |
| H(34A) – C(34) – H(34B)   | 109.5        | C(31) – C(34) – H(34C)    | 109.5        |
| H(34A) – C(34) – H(34C)   | 109.5        | H(34B) – C(34) – H(34C)   | 109.5        |
| C(32) – C(35) – H(35A)    | 109.5        | C(32) – C(35) – H(35B)    | 109.5        |
| H(35A) – C(35) – H(35B)   | 109.5        | C(32) – C(35) – H(35C)    | 109.5        |
| H(35A) – C(35) – H(35C)   | 109.5        | H(35B) – C(35) – H(35C)   | 109.5        |
| C(32) – C(36) – H(36A)    | 109.5        | C(32) – C(36) – H(36B)    | 109.5        |
| H(36A) – C(36) – H(36B)   | 109.5        | C(32) – C(36) – H(36C)    | 109.5        |
| H(36A) – C(36) – H(36C)   | 109.5        | H(36B) – C(36) – H(36C)   | 109.5        |
| C(44) – C(41) – C(43)     | 111.6(3)     | C(44) – C(41) – P(2)      | 113.2(2)     |
| C(43) – C(41) – P(2)      | 108.6(2)     | C(44) – C(41) – H(41)     | 107.7        |
| C(43) – C(41) – H(41)     | 107.7        | P(2) – C(41) – H(41)      | 107.7        |
| C(45) – C(42) – C(46)     | 110.8(3)     | C(45) – C(42) – P(2)      | 107.88(19)   |
| C(46) – C(42) – P(2)      | 116.7(2)     | C(45) – C(42) – H(42)     | 107.0        |
| C(46) – C(42) – H(42)     | 107.0        | P(2) – C(42) – H(42)      | 107.0        |
| C(41) – C(43) – H(43A)    | 109.5        | C(41) – C(43) – H(43B)    | 109.5        |
| H(43A) – C(43) – H(43B)   | 109.5        | C(41) – C(43) – H(43C)    | 109.5        |
| H(43A) – C(43) – H(43C)   | 109.5        | H(43B) – C(43) – H(43C)   | 109.5        |
| C(41) – C(44) – H(44A)    | 109.5        | C(41) – C(44) – H(44B)    | 109.5        |
| H(44A) – C(44) – H(44B)   | 109.5        | C(41) – C(44) – H(44C)    | 109.5        |
| H(44A) – C(44) – H(44C)   | 109.5        | H(44B) – C(44) – H(44C)   | 109.5        |
| C(42) – C(45) – H(45A)    | 109.5        | C(42) – C(45) – H(45B)    | 109.5        |
| H(45A) – C(45) – H(45B)   | 109.5        | C(42) – C(45) – H(45C)    | 109.5        |
| H(45A) – C(45) – H(45C)   | 109.5        | H(45B) – C(45) – H(45C)   | 109.5        |
| C(42) – C(46) – H(46A)    | 109.5        | C(42) – C(46) – H(46B)    | 109.5        |
| H(46A) – C(46) – H(46B)   | 109.5        | C(42) – C(46) – H(46C)    | 109.5        |
| H(46A) – C(46) – H(46C)   | 109.5        | H(46B) – C(46) – H(46C)   | 109.5        |
| C(11) – C – C(21)         | 116.7(2)     | C(11) – C – Pd            | 109.32(16)   |
| C(21) – C – Pd            | 115.91(16)   | C(11) – C – H             | 104.4        |
| C(21) – C – H             | 104.4        | Pd – C – H                | 104.4        |

5.4 Crystal data for  $[\{\text{PC}(\text{sp}^3)(\text{SPh})\text{P}\}^{\text{tBu}}\text{PdOTf}] \cdot \text{Et}_2\text{O} (8 \cdot \text{Et}_2\text{O})$

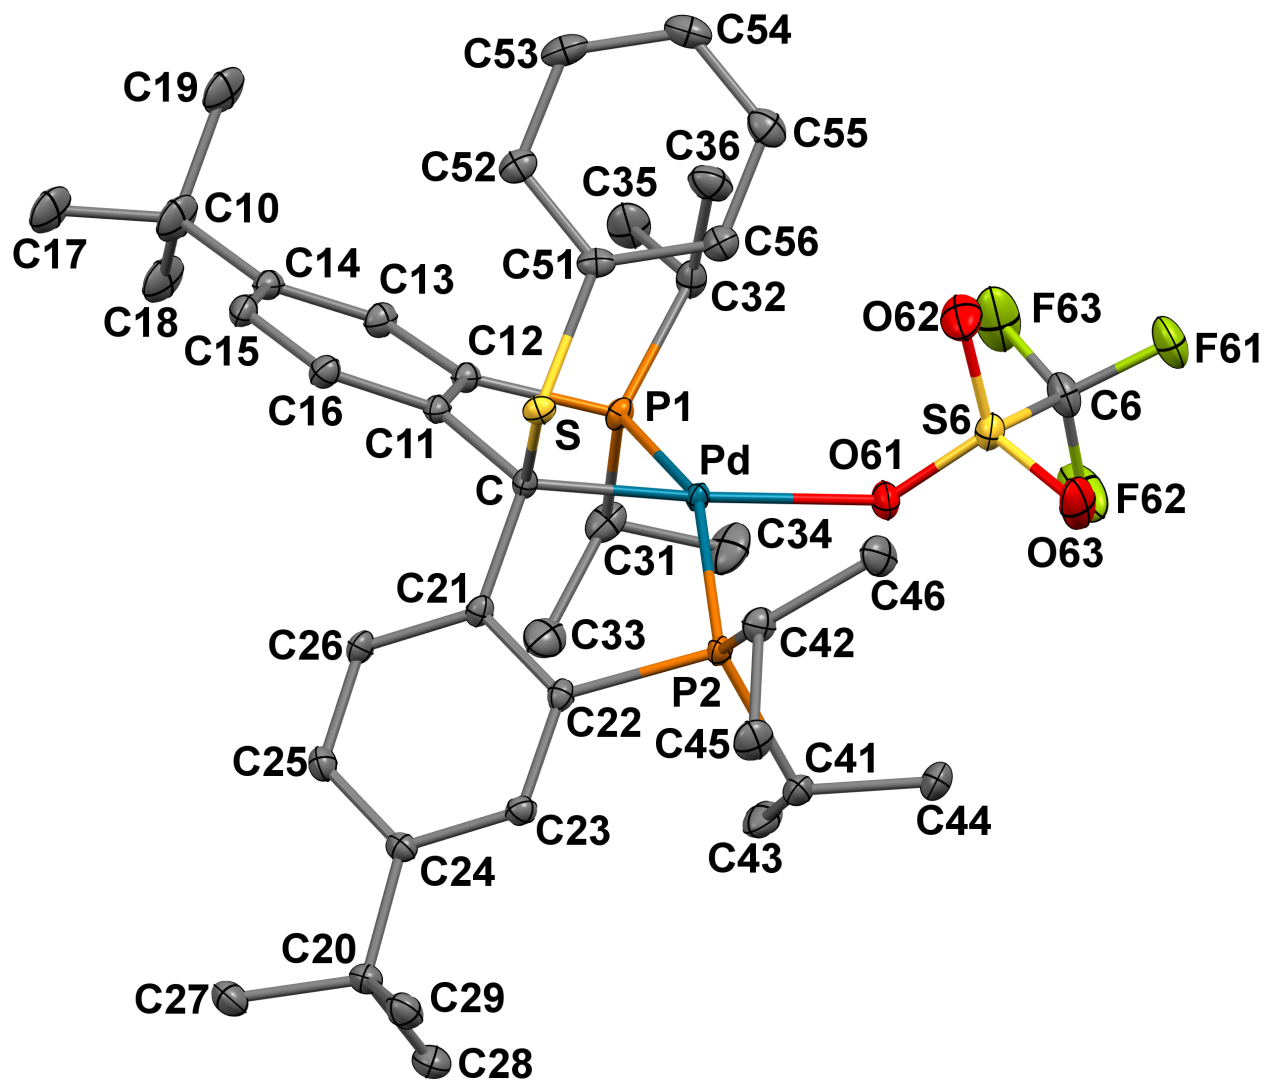

**Figure S47.** Thermal-ellipsoid representation of  $[\{\text{PC}(\text{sp}^3)(\text{SPh})\text{P}\}^{\text{tBu}}\text{PdOTf}] \cdot \text{Et}_2\text{O} (8 \cdot \text{Et}_2\text{O})$  at 50% probability. Hydrogen atoms and the solvent were omitted for clarity.



**Table S21.** Crystal data and structure refinement for  $[[\text{PC}(\text{sp}^3)(\text{SPh})\text{P}]^{\text{Bu}}\text{PdOTf}]\cdot\text{Et}_2\text{O}$  (**8-Et<sub>2</sub>O**).

|                                          |                                                                        |                     |
|------------------------------------------|------------------------------------------------------------------------|---------------------|
| Identification code:                     | pc39a                                                                  |                     |
| Empirical formula:                       | $\text{C}_{44}\text{H}_{67}\text{F}_3\text{O}_4\text{P}_2\text{PdS}_2$ |                     |
| Formula weight:                          | 949.44                                                                 |                     |
| Temperature:                             | 120(2) K                                                               |                     |
| Wavelength:                              | 0.71073 Å                                                              |                     |
| Crystal system:                          | Orthorhombic                                                           |                     |
| Space group:                             | $P2_12_12_1$                                                           |                     |
| Unit cell dimensions:                    | $a = 14.0266(6)$ Å                                                     | $\alpha = 90^\circ$ |
|                                          | $b = 15.2323(6)$ Å                                                     | $\beta = 90^\circ$  |
|                                          | $c = 21.3735(9)$ Å                                                     | $\gamma = 90^\circ$ |
| Volume:                                  | $4566.6(3)$ Å <sup>3</sup>                                             |                     |
| Z:                                       | 4                                                                      |                     |
| Density (calculated):                    | $1.381$ g·cm <sup>-3</sup>                                             |                     |
| Absorption coefficient ( $\mu$ ):        | $0.620$ mm <sup>-1</sup>                                               |                     |
| F(000):                                  | 1992                                                                   |                     |
| Crystal size:                            | $0.09 \times 0.08 \times 0.02$ mm <sup>3</sup>                         |                     |
| $\theta$ range for data collection:      | $1.64$ to $26.91^\circ$                                                |                     |
| Index ranges:                            | $-13 \leq h \leq 17$ , $-19 \leq k \leq 18$ , $-27 \leq l \leq 27$     |                     |
| Reflections collected:                   | 77120                                                                  |                     |
| Independent reflections:                 | 9882 [ $R_{\text{int}} = 0.0493$ ]                                     |                     |
| Completeness to $\theta = 25.00^\circ$ : | 100.0 %                                                                |                     |
| Absorption correction:                   | Semi-empirical from equivalents                                        |                     |
| Max. and min. transmission:              | 1.0000 and 0.9527                                                      |                     |
| Refinement method:                       | Full-matrix least-squares on $F^2$                                     |                     |
| Data / restraints / parameters:          | 9882 / 0 / 516                                                         |                     |
| Goodness-of-fit on $F^2$ :               | 1.012                                                                  |                     |
| Final R indices [ $I > 2\sigma(I)$ ]:    | $R_1 = 0.0260$ , $wR_2 = 0.0561$                                       |                     |
| R indices (all data):                    | $R_1 = 0.0331$ , $wR_2 = 0.0590$                                       |                     |
| Absolute structure parameter:            | $-0.022(15)$                                                           |                     |
| Largest diff. peak and hole:             | $0.885$ and $-0.528$ e <sup>-</sup> ·Å <sup>-3</sup>                   |                     |

**Table S22.** Atomic coordinates and equivalent isotropic displacement parameters ( $\text{\AA}^2$ ) for  $[\{\text{PC}(\text{sp}^3)(\text{SPh})\text{P}\}^t\text{Bu}\text{PdOTf}]\cdot\text{Et}_2\text{O}$  (**8-Et<sub>2</sub>O**).  $U(\text{eq})$  is defined as one third of the trace of the orthogonalized  $U_{ij}$  tensor

| atom  | x           | y           | z           | U(eq)    |
|-------|-------------|-------------|-------------|----------|
| Pd    | 0.41412(1)  | 0.49818(1)  | 0.47367(1)  | 0.014(1) |
| P(1)  | 0.40919(5)  | 0.63744(4)  | 0.51194(3)  | 0.016(1) |
| S     | 0.36480(4)  | 0.50739(4)  | 0.33191(2)  | 0.017(1) |
| P(2)  | 0.49064(4)  | 0.37483(4)  | 0.43015(3)  | 0.016(1) |
| C(13) | 0.42178(18) | 0.79545(14) | 0.44103(12) | 0.020(1) |
| C(20) | 0.82267(18) | 0.42296(16) | 0.31278(12) | 0.021(1) |
| C(19) | 0.3181(4)   | 0.9682(3)   | 0.4004(3)   | 0.035(1) |
| C(18) | 0.4863(4)   | 0.9812(3)   | 0.4289(3)   | 0.035(1) |
| C(17) | 0.4416(4)   | 0.9789(3)   | 0.3175(3)   | 0.035(1) |
| C(22) | 0.57058(17) | 0.43737(14) | 0.38026(11) | 0.016(1) |
| C(21) | 0.54495(17) | 0.52493(14) | 0.36924(11) | 0.015(1) |
| C(23) | 0.65872(18) | 0.40638(16) | 0.36027(11) | 0.018(1) |
| C(24) | 0.72394(18) | 0.45989(16) | 0.32961(12) | 0.017(1) |
| C(25) | 0.69844(19) | 0.54656(16) | 0.31983(13) | 0.021(1) |
| C(26) | 0.61033(18) | 0.57858(15) | 0.33895(12) | 0.019(1) |
| C(27) | 0.88033(18) | 0.48744(19) | 0.27385(12) | 0.028(1) |
| C(28) | 0.87611(19) | 0.40438(18) | 0.37382(13) | 0.027(1) |
| C(29) | 0.81115(19) | 0.33739(17) | 0.27569(13) | 0.026(1) |
| C(31) | 0.5110(2)   | 0.66463(17) | 0.56221(12) | 0.026(1) |
| C(32) | 0.30344(19) | 0.67426(16) | 0.55516(12) | 0.022(1) |
| C(33) | 0.60362(19) | 0.63806(18) | 0.53013(16) | 0.033(1) |
| C(34) | 0.5015(2)   | 0.6218(2)   | 0.62614(13) | 0.039(1) |
| C(35) | 0.3041(2)   | 0.77016(17) | 0.57625(15) | 0.034(1) |
| C(36) | 0.21363(18) | 0.65254(18) | 0.51810(14) | 0.030(1) |
| C(41) | 0.57276(18) | 0.31416(15) | 0.48191(12) | 0.021(1) |
| C(42) | 0.43322(18) | 0.29394(15) | 0.37851(12) | 0.021(1) |
| C(43) | 0.6265(2)   | 0.37898(18) | 0.52301(16) | 0.030(1) |
| C(44) | 0.52182(19) | 0.24488(17) | 0.52167(13) | 0.028(1) |
| C(45) | 0.5023(2)   | 0.22624(16) | 0.35127(13) | 0.028(1) |
| C(46) | 0.3452(2)   | 0.25127(17) | 0.40834(13) | 0.028(1) |
| C(51) | 0.24957(18) | 0.54088(16) | 0.35665(11) | 0.018(1) |
| C(52) | 0.20881(18) | 0.61731(17) | 0.33375(11) | 0.022(1) |
| C(53) | 0.11612(19) | 0.63889(18) | 0.35044(12) | 0.027(1) |
| C(54) | 0.06470(19) | 0.58479(18) | 0.38934(13) | 0.028(1) |
| C(55) | 0.10513(17) | 0.50864(19) | 0.41262(11) | 0.026(1) |
| C(56) | 0.19774(17) | 0.48723(17) | 0.39648(11) | 0.022(1) |
| C     | 0.44611(17) | 0.55644(14) | 0.38973(11) | 0.015(1) |
| C(14) | 0.42412(18) | 0.84165(15) | 0.38536(11) | 0.018(1) |
| C(16) | 0.43488(17) | 0.70222(15) | 0.33139(12) | 0.020(1) |
| C(15) | 0.42920(18) | 0.79270(15) | 0.33061(12) | 0.021(1) |
| C(11) | 0.43422(16) | 0.65597(15) | 0.38803(11) | 0.016(1) |
| C(10) | 0.4191(2)   | 0.94215(16) | 0.38394(14) | 0.035(1) |
| O(7)  | 0.17564(14) | 0.25158(13) | 0.26152(9)  | 0.033(1) |
| C(12) | 0.42323(18) | 0.70360(14) | 0.44253(11) | 0.017(1) |
| F(61) | 0.18489(12) | 0.38273(11) | 0.67857(7)  | 0.037(1) |
| O(61) | 0.36997(13) | 0.43521(11) | 0.56108(8)  | 0.024(1) |
| F(62) | 0.33225(13) | 0.41445(16) | 0.69062(8)  | 0.055(1) |
| O(62) | 0.20182(14) | 0.41398(14) | 0.53911(9)  | 0.039(1) |

Continued on next page

**Table S22.** – continued from previous page

| atom   | x           | y           | z           | U(eq)    |
|--------|-------------|-------------|-------------|----------|
| F(63)  | 0.23599(15) | 0.51005(13) | 0.65394(8)  | 0.055(1) |
| C(71)  | 0.3237(2)   | 0.3077(2)   | 0.22396(14) | 0.035(1) |
| C(72)  | 0.2321(2)   | 0.32779(18) | 0.25740(14) | 0.032(1) |
| C(73)  | 0.0930(2)   | 0.2671(2)   | 0.29785(14) | 0.037(1) |
| C(74)  | 0.0387(2)   | 0.1834(2)   | 0.30582(16) | 0.043(1) |
| C(91)  | 0.5072(5)   | 0.9749(3)   | 0.3518(3)   | 0.035(1) |
| C(93)  | 0.3288(5)   | 0.9727(4)   | 0.3523(3)   | 0.035(1) |
| C(96)  | 0.4181(5)   | 0.9817(3)   | 0.4509(3)   | 0.035(1) |
| O(63)  | 0.29479(16) | 0.29528(12) | 0.58236(11) | 0.041(1) |
| C(6)   | 0.2578(2)   | 0.42570(18) | 0.65383(12) | 0.026(1) |
| S(6)   | 0.28217(5)  | 0.38745(4)  | 0.57483(3)  | 0.021(1) |
| H(13)  | 0.4191      | 0.8270      | 0.4793      | 0.024    |
| H(19A) | 0.2733      | 0.9278      | 0.3802      | 0.052    |
| H(19B) | 0.3060      | 1.0282      | 0.3857      | 0.052    |
| H(19C) | 0.3097      | 0.9656      | 0.4459      | 0.052    |
| H(18A) | 0.5518      | 0.9689      | 0.4155      | 0.052    |
| H(18B) | 0.4755      | 0.9558      | 0.4704      | 0.052    |
| H(18C) | 0.4764      | 1.0448      | 0.4306      | 0.052    |
| H(17A) | 0.5091      | 0.9693      | 0.3079      | 0.052    |
| H(17B) | 0.4278      | 1.0419      | 0.3164      | 0.052    |
| H(17C) | 0.4021      | 0.9486      | 0.2865      | 0.052    |
| H(23)  | 0.6749      | 0.3467      | 0.3678      | 0.021    |
| H(25)  | 0.7420      | 0.5850      | 0.2996      | 0.025    |
| H(26)  | 0.5946      | 0.6382      | 0.3311      | 0.023    |
| H(27A) | 0.9420      | 0.4612      | 0.2632      | 0.042    |
| H(27B) | 0.8907      | 0.5414      | 0.2979      | 0.042    |
| H(27C) | 0.8455      | 0.5013      | 0.2354      | 0.042    |
| H(28A) | 0.9408      | 0.3842      | 0.3642      | 0.041    |
| H(28B) | 0.8423      | 0.3589      | 0.3975      | 0.041    |
| H(28C) | 0.8794      | 0.4582      | 0.3988      | 0.041    |
| H(29A) | 0.7758      | 0.3492      | 0.2370      | 0.040    |
| H(29B) | 0.7761      | 0.2945      | 0.3010      | 0.040    |
| H(29C) | 0.8742      | 0.3138      | 0.2653      | 0.040    |
| H(31)  | 0.5120      | 0.7297      | 0.5683      | 0.031    |
| H(32)  | 0.3007      | 0.6380      | 0.5941      | 0.026    |
| H(33A) | 0.6056      | 0.5741      | 0.5255      | 0.050    |
| H(33B) | 0.6579      | 0.6574      | 0.5555      | 0.050    |
| H(33C) | 0.6070      | 0.6656      | 0.4888      | 0.050    |
| H(34A) | 0.4914      | 0.5586      | 0.6210      | 0.058    |
| H(34B) | 0.4472      | 0.6474      | 0.6484      | 0.058    |
| H(34C) | 0.5599      | 0.6318      | 0.6503      | 0.058    |
| H(35A) | 0.2991      | 0.8085      | 0.5396      | 0.051    |
| H(35B) | 0.3636      | 0.7826      | 0.5985      | 0.051    |
| H(35C) | 0.2499      | 0.7808      | 0.6042      | 0.051    |
| H(36A) | 0.2154      | 0.6830      | 0.4777      | 0.046    |
| H(36B) | 0.1574      | 0.6716      | 0.5417      | 0.046    |
| H(36C) | 0.2103      | 0.5890      | 0.5110      | 0.046    |
| H(41)  | 0.6204      | 0.2833      | 0.4549      | 0.025    |
| H(42)  | 0.4088      | 0.3281      | 0.3419      | 0.025    |
| H(43A) | 0.6605      | 0.4212      | 0.4965      | 0.046    |
| H(43B) | 0.6724      | 0.3472      | 0.5491      | 0.046    |

Continued on next page

**Table S22.** – continued from previous page

| atom   | x       | y      | x      | U(eq) |
|--------|---------|--------|--------|-------|
| H(43C) | 0.5813  | 0.4103 | 0.5499 | 0.046 |
| H(44A) | 0.4941  | 0.2001 | 0.4943 | 0.042 |
| H(44B) | 0.4711  | 0.2729 | 0.5461 | 0.042 |
| H(44C) | 0.5677  | 0.2173 | 0.5501 | 0.042 |
| H(45A) | 0.4682  | 0.1882 | 0.3218 | 0.041 |
| H(45B) | 0.5289  | 0.1906 | 0.3852 | 0.041 |
| H(45C) | 0.5540  | 0.2566 | 0.3293 | 0.041 |
| H(46A) | 0.3098  | 0.2186 | 0.3764 | 0.042 |
| H(46B) | 0.3042  | 0.2970 | 0.4261 | 0.042 |
| H(46C) | 0.3654  | 0.2110 | 0.4415 | 0.042 |
| H(52)  | 0.2441  | 0.6547 | 0.3068 | 0.026 |
| H(53)  | 0.0880  | 0.6913 | 0.3349 | 0.033 |
| H(54)  | 0.0011  | 0.5998 | 0.4003 | 0.033 |
| H(55)  | 0.0695  | 0.4713 | 0.4395 | 0.031 |
| H(56)  | 0.2260  | 0.4354 | 0.4128 | 0.026 |
| H(16)  | 0.4393  | 0.6710 | 0.2930 | 0.024 |
| H(15)  | 0.4288  | 0.8224 | 0.2915 | 0.025 |
| H(71A) | 0.3101  | 0.2929 | 0.1803 | 0.052 |
| H(71B) | 0.3554  | 0.2580 | 0.2443 | 0.052 |
| H(71C) | 0.3655  | 0.3593 | 0.2255 | 0.052 |
| H(72A) | 0.2462  | 0.3500 | 0.2999 | 0.038 |
| H(72B) | 0.1969  | 0.3740 | 0.2345 | 0.038 |
| H(73A) | 0.0523  | 0.3113 | 0.2769 | 0.044 |
| H(73B) | 0.1115  | 0.2905 | 0.3394 | 0.044 |
| H(74A) | 0.0173  | 0.1623 | 0.2648 | 0.064 |
| H(74B) | -0.0168 | 0.1938 | 0.3326 | 0.064 |
| H(74C) | 0.0800  | 0.1392 | 0.3252 | 0.064 |
| H(91A) | 0.5132  | 0.9466 | 0.3108 | 0.052 |
| H(91B) | 0.5632  | 0.9609 | 0.3773 | 0.052 |
| H(91C) | 0.5028  | 1.0387 | 0.3462 | 0.052 |
| H(93A) | 0.3306  | 0.9564 | 0.3080 | 0.052 |
| H(93B) | 0.3235  | 1.0366 | 0.3560 | 0.052 |
| H(93C) | 0.2737  | 0.9449 | 0.3723 | 0.052 |
| H(96A) | 0.4204  | 1.0459 | 0.4482 | 0.052 |
| H(96B) | 0.4737  | 0.9605 | 0.4742 | 0.052 |
| H(96C) | 0.3597  | 0.9637 | 0.4725 | 0.052 |

**Table S23.** Anisotropic displacement parameters ( $\text{\AA}^2$ ) for  $[\{\text{PC}(\text{sp}^3)(\text{SPh})\text{P}\}^{\text{tBu}}\text{PdOTf}]\cdot\text{Et}_2\text{O}$  (**8-Et<sub>2</sub>O**). The anisotropic displacement factor exponent takes the form:  $-2\pi^2[h^2a^*{}^2U_{11} + \dots + 2hka^*b^*U_{12}]$ .

| atom  | U <sub>11</sub> | U <sub>22</sub> | U <sub>33</sub> | U <sub>23</sub> | U <sub>13</sub> | U <sub>12</sub> |
|-------|-----------------|-----------------|-----------------|-----------------|-----------------|-----------------|
| Pd    | 0.0159(1)       | 0.0101(1)       | 0.0145(1)       | 0.0012(1)       | 0.0013(1)       | 0.0000(1)       |
| P(1)  | 0.0214(3)       | 0.0118(3)       | 0.0156(3)       | -0.0007(2)      | -0.0011(3)      | -0.0003(2)      |
| S     | 0.0182(3)       | 0.0150(3)       | 0.0168(2)       | -0.0024(3)      | -0.0002(2)      | 0.0018(3)       |
| P(2)  | 0.0171(3)       | 0.0114(3)       | 0.0184(3)       | 0.0019(2)       | 0.0030(3)       | 0.0002(2)       |
| C(13) | 0.0216(13)      | 0.0135(10)      | 0.0245(12)      | -0.0018(9)      | -0.0024(11)     | -0.0022(10)     |
| C(20) | 0.0161(13)      | 0.0214(13)      | 0.0249(13)      | 0.0022(10)      | 0.0022(11)      | 0.0020(10)      |
| C(19) | 0.0470(12)      | 0.0109(7)       | 0.0471(11)      | 0.0023(7)       | -0.0045(10)     | -0.0007(8)      |
| C(18) | 0.0470(12)      | 0.0109(7)       | 0.0471(11)      | 0.0023(7)       | -0.0045(10)     | -0.0007(8)      |
| C(17) | 0.0470(12)      | 0.0109(7)       | 0.0471(11)      | 0.0023(7)       | -0.0045(10)     | -0.0007(8)      |
| C(22) | 0.0182(13)      | 0.0135(11)      | 0.0161(11)      | 0.0009(9)       | -0.0018(10)     | -0.0028(10)     |
| C(21) | 0.0198(12)      | 0.0115(12)      | 0.0133(11)      | -0.0011(8)      | 0.0010(9)       | 0.0005(9)       |
| C(23) | 0.0168(13)      | 0.0146(11)      | 0.0223(12)      | -0.0002(9)      | 0.0000(10)      | 0.0016(9)       |
| C(24) | 0.0157(13)      | 0.0193(12)      | 0.0173(12)      | -0.0004(10)     | 0.0016(11)      | 0.0000(10)      |
| C(25) | 0.0191(14)      | 0.0196(13)      | 0.0230(13)      | 0.0025(10)      | 0.0029(11)      | -0.0037(10)     |
| C(26) | 0.0227(15)      | 0.0110(11)      | 0.0240(13)      | 0.0027(10)      | 0.0004(11)      | -0.0002(9)      |
| C(27) | 0.0197(12)      | 0.0311(16)      | 0.0332(13)      | 0.0014(12)      | 0.0060(10)      | -0.0010(12)     |
| C(28) | 0.0190(13)      | 0.0311(15)      | 0.0318(15)      | 0.0036(12)      | -0.0005(12)     | 0.0002(11)      |
| C(29) | 0.0224(14)      | 0.0245(13)      | 0.0326(15)      | -0.0026(11)     | 0.0067(12)      | 0.0006(11)      |
| C(31) | 0.0336(16)      | 0.0188(12)      | 0.0248(14)      | -0.0019(11)     | -0.0106(12)     | -0.0006(11)     |
| C(32) | 0.0302(15)      | 0.0152(12)      | 0.0198(12)      | -0.0004(10)     | 0.0082(11)      | 0.0009(11)      |
| C(33) | 0.0264(16)      | 0.0293(14)      | 0.0444(17)      | 0.0019(14)      | -0.0091(15)     | -0.0057(11)     |
| C(34) | 0.0492(19)      | 0.0400(17)      | 0.0266(15)      | 0.0062(13)      | -0.0174(14)     | -0.0065(15)     |
| C(35) | 0.0426(18)      | 0.0209(14)      | 0.0391(16)      | -0.0088(12)     | 0.0132(15)      | 0.0023(12)      |
| C(36) | 0.0233(14)      | 0.0256(14)      | 0.0422(17)      | -0.0068(13)     | 0.0060(13)      | 0.0023(11)      |
| C(41) | 0.0215(13)      | 0.0172(11)      | 0.0243(13)      | 0.0049(9)       | 0.0030(11)      | 0.0029(10)      |
| C(42) | 0.0229(15)      | 0.0152(11)      | 0.0245(13)      | -0.0024(10)     | -0.0005(11)     | -0.0015(10)     |
| C(43) | 0.0280(15)      | 0.0274(14)      | 0.0359(15)      | 0.0080(13)      | -0.0108(14)     | 0.0011(12)      |
| C(44) | 0.0300(15)      | 0.0242(13)      | 0.0300(14)      | 0.0118(12)      | 0.0021(13)      | 0.0029(11)      |
| C(45) | 0.0347(16)      | 0.0151(12)      | 0.0331(15)      | -0.0052(11)     | 0.0035(13)      | 0.0011(11)      |
| C(46) | 0.0262(15)      | 0.0169(13)      | 0.0413(16)      | -0.0017(11)     | 0.0021(12)      | -0.0057(11)     |
| C(51) | 0.0166(13)      | 0.0193(12)      | 0.0175(12)      | -0.0058(9)      | -0.0048(10)     | 0.0019(10)      |
| C(52) | 0.0247(14)      | 0.0211(12)      | 0.0202(12)      | -0.0018(10)     | -0.0036(11)     | 0.0022(11)      |
| C(53) | 0.0284(15)      | 0.0245(14)      | 0.0293(14)      | -0.0038(11)     | -0.0081(12)     | 0.0106(11)      |
| C(54) | 0.0176(14)      | 0.0330(15)      | 0.0320(14)      | -0.0095(12)     | -0.0008(12)     | 0.0027(11)      |
| C(55) | 0.0227(13)      | 0.0263(13)      | 0.0297(12)      | -0.0057(12)     | 0.0015(10)      | -0.0052(12)     |
| C(56) | 0.0231(13)      | 0.0213(14)      | 0.0205(11)      | -0.0016(10)     | -0.0014(10)     | 0.0007(11)      |
| C     | 0.0185(13)      | 0.0123(11)      | 0.0148(11)      | 0.0026(9)       | 0.0009(10)      | -0.0006(9)      |
| C(14) | 0.0149(12)      | 0.0137(10)      | 0.0267(12)      | 0.0015(9)       | -0.0020(11)     | -0.0007(10)     |
| C(16) | 0.0218(14)      | 0.0171(11)      | 0.0199(12)      | 0.0008(9)       | -0.0002(10)     | 0.0021(10)      |
| C(15) | 0.0208(14)      | 0.0172(11)      | 0.0238(13)      | 0.0064(9)       | -0.0019(11)     | -0.0011(10)     |
| C(11) | 0.0137(13)      | 0.0136(11)      | 0.0205(12)      | 0.0033(9)       | -0.0016(10)     | -0.0012(9)      |
| C(10) | 0.0470(12)      | 0.0109(7)       | 0.0471(11)      | 0.0023(7)       | -0.0045(10)     | -0.0007(8)      |
| O(7)  | 0.0299(12)      | 0.0331(11)      | 0.0371(11)      | -0.0085(9)      | 0.0049(9)       | 0.0011(9)       |
| C(12) | 0.0153(12)      | 0.0135(10)      | 0.0216(12)      | 0.0007(9)       | -0.0008(10)     | -0.0009(10)     |
| F(61) | 0.0366(10)      | 0.0402(10)      | 0.0352(9)       | -0.0018(8)      | 0.0174(8)       | -0.0115(8)      |
| O(61) | 0.0252(10)      | 0.0259(9)       | 0.0206(9)       | 0.0057(7)       | 0.0049(8)       | -0.0034(8)      |
| F(62) | 0.0379(11)      | 0.1066(17)      | 0.0205(8)       | 0.0057(10)      | -0.0049(8)      | -0.0171(11)     |
| O(62) | 0.0332(12)      | 0.0525(13)      | 0.0312(12)      | 0.0125(10)      | -0.0111(9)      | -0.0087(10)     |
| F(63) | 0.0781(13)      | 0.0265(10)      | 0.0592(11)      | -0.0134(9)      | 0.0357(10)      | -0.0056(10)     |

Continued on next page

**Table S23.** – continued from previous page

| atom  | U <sub>11</sub> | U <sub>22</sub> | U <sub>33</sub> | U <sub>23</sub> | U <sub>13</sub> | U <sub>12</sub> |
|-------|-----------------|-----------------|-----------------|-----------------|-----------------|-----------------|
| C(71) | 0.0313(17)      | 0.0409(17)      | 0.0317(16)      | -0.0080(13)     | 0.0010(14)      | -0.0004(13)     |
| C(72) | 0.0328(17)      | 0.0271(15)      | 0.0352(16)      | -0.0047(12)     | 0.0005(13)      | 0.0003(12)      |
| C(73) | 0.0314(17)      | 0.0420(17)      | 0.0378(16)      | -0.0055(13)     | 0.0078(15)      | 0.0064(14)      |
| C(74) | 0.0438(19)      | 0.0420(19)      | 0.0428(19)      | -0.0100(15)     | 0.0068(16)      | -0.0029(15)     |
| C(91) | 0.0470(12)      | 0.0109(7)       | 0.0471(11)      | 0.0023(7)       | -0.0045(10)     | -0.0007(8)      |
| C(93) | 0.0470(12)      | 0.0109(7)       | 0.0471(11)      | 0.0023(7)       | -0.0045(10)     | -0.0007(8)      |
| C(96) | 0.0470(12)      | 0.0109(7)       | 0.0471(11)      | 0.0023(7)       | -0.0045(10)     | -0.0007(8)      |
| O(63) | 0.0549(15)      | 0.0152(9)       | 0.0535(14)      | 0.0003(9)       | 0.0244(12)      | -0.0002(9)      |
| C(6)  | 0.0277(16)      | 0.0285(15)      | 0.0225(13)      | -0.0020(11)     | 0.0067(12)      | -0.0086(12)     |
| S(6)  | 0.0270(3)       | 0.0173(3)       | 0.0181(3)       | 0.0019(2)       | 0.0034(3)       | -0.0010(2)      |

**Table S24.** Distances [Å] for  $[\{\text{PC}(\text{sp}^3)(\text{SPh})\text{P}\}^{\text{Bu}}\text{PdOTf}]\cdot\text{Et}_2\text{O}$  (**8-Et<sub>2</sub>O**).

| atom – atom    | distance  | atom – atom    | distance   |
|----------------|-----------|----------------|------------|
| Pd – C         | 2.051(2)  | Pd – O(61)     | 2.1895(17) |
| Pd – P(1)      | 2.2745(6) | Pd – P(2)      | 2.3554(6)  |
| P(1) – C(12)   | 1.804(2)  | P(1) – C(31)   | 1.835(3)   |
| P(1) – C(32)   | 1.835(3)  | S – C(51)      | 1.776(3)   |
| S – C          | 1.840(2)  | P(2) – C(22)   | 1.817(2)   |
| P(2) – C(42)   | 1.840(2)  | P(2) – C(41)   | 1.845(2)   |
| C(13) – C(14)  | 1.383(3)  | C(13) – C(12)  | 1.400(3)   |
| C(13) – H(13)  | 0.9500    | C(20) – C(27)  | 1.520(4)   |
| C(20) – C(28)  | 1.531(4)  | C(20) – C(29)  | 1.534(4)   |
| C(20) – C(24)  | 1.537(3)  | C(19) – C(10)  | 1.512(7)   |
| C(19) – H(19A) | 0.9800    | C(19) – H(19B) | 0.9800     |
| C(19) – H(19C) | 0.9800    | C(18) – C(10)  | 1.471(6)   |
| C(18) – H(18A) | 0.9800    | C(18) – H(18B) | 0.9800     |
| C(18) – H(18C) | 0.9800    | C(17) – C(10)  | 1.558(6)   |
| C(17) – H(17A) | 0.9800    | C(17) – H(17B) | 0.9800     |
| C(17) – H(17C) | 0.9800    | C(22) – C(23)  | 1.391(3)   |
| C(22) – C(21)  | 1.401(3)  | C(21) – C(26)  | 1.389(3)   |
| C(21) – C      | 1.531(3)  | C(23) – C(24)  | 1.389(3)   |
| C(23) – H(23)  | 0.9500    | C(24) – C(25)  | 1.384(3)   |
| C(25) – C(26)  | 1.390(4)  | C(25) – H(25)  | 0.9500     |
| C(26) – H(26)  | 0.9500    | C(27) – H(27A) | 0.9800     |
| C(27) – H(27B) | 0.9800    | C(27) – H(27C) | 0.9800     |
| C(28) – H(28A) | 0.9800    | C(28) – H(28B) | 0.9800     |
| C(28) – H(28C) | 0.9800    | C(29) – H(29A) | 0.9800     |
| C(29) – H(29B) | 0.9800    | C(29) – H(29C) | 0.9800     |
| C(31) – C(34)  | 1.520(4)  | C(31) – C(33)  | 1.524(4)   |
| C(31) – H(31)  | 1.0000    | C(32) – C(36)  | 1.524(4)   |
| C(32) – C(35)  | 1.529(3)  | C(32) – H(32)  | 1.0000     |
| C(33) – H(33A) | 0.9800    | C(33) – H(33B) | 0.9800     |
| C(33) – H(33C) | 0.9800    | C(34) – H(34A) | 0.9800     |
| C(34) – H(34B) | 0.9800    | C(34) – H(34C) | 0.9800     |
| C(35) – H(35A) | 0.9800    | C(35) – H(35B) | 0.9800     |
| C(35) – H(35C) | 0.9800    | C(36) – H(36A) | 0.9800     |
| C(36) – H(36B) | 0.9800    | C(36) – H(36C) | 0.9800     |
| C(41) – C(43)  | 1.522(4)  | C(41) – C(44)  | 1.532(3)   |
| C(41) – H(41)  | 1.0000    | C(42) – C(45)  | 1.530(3)   |
| C(42) – C(46)  | 1.534(4)  | C(42) – H(42)  | 1.0000     |
| C(43) – H(43A) | 0.9800    | C(43) – H(43B) | 0.9800     |
| C(43) – H(43C) | 0.9800    | C(44) – H(44A) | 0.9800     |
| C(44) – H(44B) | 0.9800    | C(44) – H(44C) | 0.9800     |
| C(45) – H(45A) | 0.9800    | C(45) – H(45B) | 0.9800     |
| C(45) – H(45C) | 0.9800    | C(46) – H(46A) | 0.9800     |
| C(46) – H(46B) | 0.9800    | C(46) – H(46C) | 0.9800     |
| C(51) – C(56)  | 1.386(3)  | C(51) – C(52)  | 1.386(3)   |
| C(52) – C(53)  | 1.388(4)  | C(52) – H(52)  | 0.9500     |
| C(53) – C(54)  | 1.375(4)  | C(53) – H(53)  | 0.9500     |
| C(54) – C(55)  | 1.384(4)  | C(54) – H(54)  | 0.9500     |
| C(55) – C(56)  | 1.383(3)  | C(55) – H(55)  | 0.9500     |
| C(56) – H(56)  | 0.9500    | C – C(11)      | 1.526(3)   |
| C(14) – C(15)  | 1.389(3)  | C(14) – C(10)  | 1.533(3)   |

Continued on next page

**Table S24.** – continued from previous page

| <b>atom – atom</b> | <b>distance</b> | <b>atom – atom</b> | <b>distance</b> |
|--------------------|-----------------|--------------------|-----------------|
| C(16) – C(15)      | 1.381(3)        | C(16) – C(11)      | 1.401(3)        |
| C(16) – H(16)      | 0.9500          | C(15) – H(15)      | 0.9500          |
| C(11) – C(12)      | 1.381(3)        | C(10) – C(91)      | 1.500(7)        |
| C(10) – C(93)      | 1.509(7)        | C(10) – C(96)      | 1.553(7)        |
| O(7) – C(72)       | 1.408(3)        | O(7) – C(73)       | 1.415(3)        |
| F(61) – C(6)       | 1.324(3)        | O(61) – S(6)       | 1.4603(18)      |
| F(62) – C(6)       | 1.318(3)        | O(62) – S(6)       | 1.420(2)        |
| F(63) – C(6)       | 1.321(3)        | C(71) – C(72)      | 1.502(4)        |
| C(71) – H(71A)     | 0.9800          | C(71) – H(71B)     | 0.9800          |
| C(71) – H(71C)     | 0.9800          | C(72) – H(72A)     | 0.9900          |
| C(72) – H(72B)     | 0.9900          | C(73) – C(74)      | 1.495(4)        |
| C(73) – H(73A)     | 0.9900          | C(73) – H(73B)     | 0.9900          |
| C(74) – H(74A)     | 0.9800          | C(74) – H(74B)     | 0.9800          |
| C(74) – H(74C)     | 0.9800          | C(91) – H(91A)     | 0.9800          |
| C(91) – H(91B)     | 0.9800          | C(91) – H(91C)     | 0.9800          |
| C(93) – H(93A)     | 0.9800          | C(93) – H(93B)     | 0.9800          |
| C(93) – H(93C)     | 0.9800          | C(96) – H(96A)     | 0.9800          |
| C(96) – H(96B)     | 0.9800          | C(96) – H(96C)     | 0.9800          |
| O(63) – S(6)       | 1.424(2)        | C(6) – S(6)        | 1.818(3)        |



**Table S25.** Angles [°] for  $[\{\text{PC}(\text{sp}^3)(\text{SPh})\text{P}\}^t\text{BuPdOTf}]\cdot\text{Et}_2\text{O}$  (**8-Et<sub>2</sub>O**).

| atom – atom – atom      | angle      | atom – atom – atom      | angle      |
|-------------------------|------------|-------------------------|------------|
| C – Pd – O(61)          | 176.11(8)  | C – Pd – P(1)           | 85.28(6)   |
| O(61) – Pd – P(1)       | 95.34(5)   | C – Pd – P(2)           | 84.26(6)   |
| O(61) – Pd – P(2)       | 96.68(5)   | P(1) – Pd – P(2)        | 154.14(2)  |
| C(12) – P(1) – C(31)    | 105.69(12) | C(12) – P(1) – C(32)    | 109.35(11) |
| C(31) – P(1) – C(32)    | 105.39(12) | C(12) – P(1) – Pd       | 102.82(7)  |
| C(31) – P(1) – Pd       | 113.42(9)  | C(32) – P(1) – Pd       | 119.38(8)  |
| C(51) – S – C           | 104.33(11) | C(22) – P(2) – C(42)    | 105.62(11) |
| C(22) – P(2) – C(41)    | 103.25(11) | C(42) – P(2) – C(41)    | 107.31(11) |
| C(22) – P(2) – Pd       | 95.43(8)   | C(42) – P(2) – Pd       | 124.87(8)  |
| C(41) – P(2) – Pd       | 116.56(8)  | C(14) – C(13) – C(12)   | 121.9(2)   |
| C(14) – C(13) – H(13)   | 119.1      | C(12) – C(13) – H(13)   | 119.1      |
| C(27) – C(20) – C(28)   | 109.0(2)   | C(27) – C(20) – C(29)   | 108.8(2)   |
| C(28) – C(20) – C(29)   | 109.6(2)   | C(27) – C(20) – C(24)   | 111.8(2)   |
| C(28) – C(20) – C(24)   | 108.0(2)   | C(29) – C(20) – C(24)   | 109.7(2)   |
| C(10) – C(19) – H(19A)  | 109.5      | C(10) – C(19) – H(19B)  | 109.5      |
| H(19A) – C(19) – H(19B) | 109.5      | C(10) – C(19) – H(19C)  | 109.5      |
| H(19A) – C(19) – H(19C) | 109.5      | H(19B) – C(19) – H(19C) | 109.5      |
| C(10) – C(18) – H(18A)  | 109.5      | C(10) – C(18) – H(18B)  | 109.5      |
| H(18A) – C(18) – H(18B) | 109.5      | C(10) – C(18) – H(18C)  | 109.5      |
| H(18A) – C(18) – H(18C) | 109.5      | H(18B) – C(18) – H(18C) | 109.5      |
| C(10) – C(17) – H(17A)  | 109.5      | C(10) – C(17) – H(17B)  | 109.5      |
| H(17A) – C(17) – H(17B) | 109.5      | C(10) – C(17) – H(17C)  | 109.5      |
| H(17A) – C(17) – H(17C) | 109.5      | H(17B) – C(17) – H(17C) | 109.5      |
| C(23) – C(22) – C(21)   | 120.0(2)   | C(23) – C(22) – P(2)    | 123.43(18) |
| C(21) – C(22) – P(2)    | 116.06(18) | C(26) – C(21) – C(22)   | 118.0(2)   |
| C(26) – C(21) – C       | 123.2(2)   | C(22) – C(21) – C       | 118.9(2)   |
| C(24) – C(23) – C(22)   | 122.1(2)   | C(24) – C(23) – H(23)   | 119.0      |
| C(22) – C(23) – H(23)   | 119.0      | C(25) – C(24) – C(23)   | 117.4(2)   |
| C(25) – C(24) – C(20)   | 123.1(2)   | C(23) – C(24) – C(20)   | 119.3(2)   |
| C(24) – C(25) – C(26)   | 121.3(2)   | C(24) – C(25) – H(25)   | 119.3      |
| C(26) – C(25) – H(25)   | 119.3      | C(21) – C(26) – C(25)   | 121.2(2)   |
| C(21) – C(26) – H(26)   | 119.4      | C(25) – C(26) – H(26)   | 119.4      |
| C(20) – C(27) – H(27A)  | 109.5      | C(20) – C(27) – H(27B)  | 109.5      |
| H(27A) – C(27) – H(27B) | 109.5      | C(20) – C(27) – H(27C)  | 109.5      |
| H(27A) – C(27) – H(27C) | 109.5      | H(27B) – C(27) – H(27C) | 109.5      |
| C(20) – C(28) – H(28A)  | 109.5      | C(20) – C(28) – H(28B)  | 109.5      |
| H(28A) – C(28) – H(28B) | 109.5      | C(20) – C(28) – H(28C)  | 109.5      |
| H(28A) – C(28) – H(28C) | 109.5      | H(28B) – C(28) – H(28C) | 109.5      |
| C(20) – C(29) – H(29A)  | 109.5      | C(20) – C(29) – H(29B)  | 109.5      |
| H(29A) – C(29) – H(29B) | 109.5      | C(20) – C(29) – H(29C)  | 109.5      |
| H(29A) – C(29) – H(29C) | 109.5      | H(29B) – C(29) – H(29C) | 109.5      |
| C(34) – C(31) – C(33)   | 111.4(2)   | C(34) – C(31) – P(1)    | 111.2(2)   |
| C(33) – C(31) – P(1)    | 109.89(19) | C(34) – C(31) – H(31)   | 108.1      |
| C(33) – C(31) – H(31)   | 108.1      | P(1) – C(31) – H(31)    | 108.1      |
| C(36) – C(32) – C(35)   | 111.4(2)   | C(36) – C(32) – P(1)    | 109.88(17) |
| C(35) – C(32) – P(1)    | 115.84(19) | C(36) – C(32) – H(32)   | 106.4      |
| C(35) – C(32) – H(32)   | 106.4      | P(1) – C(32) – H(32)    | 106.4      |
| C(31) – C(33) – H(33A)  | 109.5      | C(31) – C(33) – H(33B)  | 109.5      |
| H(33A) – C(33) – H(33B) | 109.5      | C(31) – C(33) – H(33C)  | 109.5      |
| H(33A) – C(33) – H(33C) | 109.5      | H(33B) – C(33) – H(33C) | 109.5      |

Continued on next page

**Table S25.** – continued from previous page

| <b>atom – atom – atom</b> | <b>angle</b> | <b>atom – atom – atom</b> | <b>angle</b> |
|---------------------------|--------------|---------------------------|--------------|
| C(31) – C(34) – H(34A)    | 109.5        | C(31) – C(34) – H(34B)    | 109.5        |
| H(34A) – C(34) – H(34B)   | 109.5        | C(31) – C(34) – H(34C)    | 109.5        |
| H(34A) – C(34) – H(34C)   | 109.5        | H(34B) – C(34) – H(34C)   | 109.5        |
| C(32) – C(35) – H(35A)    | 109.5        | C(32) – C(35) – H(35B)    | 109.5        |
| H(35A) – C(35) – H(35B)   | 109.5        | C(32) – C(35) – H(35C)    | 109.5        |
| H(35A) – C(35) – H(35C)   | 109.5        | H(35B) – C(35) – H(35C)   | 109.5        |
| C(32) – C(36) – H(36A)    | 109.5        | C(32) – C(36) – H(36B)    | 109.5        |
| H(36A) – C(36) – H(36B)   | 109.5        | C(32) – C(36) – H(36C)    | 109.5        |
| H(36A) – C(36) – H(36C)   | 109.5        | H(36B) – C(36) – H(36C)   | 109.5        |
| C(43) – C(41) – C(44)     | 111.0(2)     | C(43) – C(41) – P(2)      | 109.30(16)   |
| C(44) – C(41) – P(2)      | 112.74(17)   | C(43) – C(41) – H(41)     | 107.9        |
| C(44) – C(41) – H(41)     | 107.9        | P(2) – C(41) – H(41)      | 107.9        |
| C(45) – C(42) – C(46)     | 112.5(2)     | C(45) – C(42) – P(2)      | 113.73(18)   |
| C(46) – C(42) – P(2)      | 112.75(18)   | C(45) – C(42) – H(42)     | 105.7        |
| C(46) – C(42) – H(42)     | 105.7        | P(2) – C(42) – H(42)      | 105.7        |
| C(41) – C(43) – H(43A)    | 109.5        | C(41) – C(43) – H(43B)    | 109.5        |
| H(43A) – C(43) – H(43B)   | 109.5        | C(41) – C(43) – H(43C)    | 109.5        |
| H(43A) – C(43) – H(43C)   | 109.5        | H(43B) – C(43) – H(43C)   | 109.5        |
| C(41) – C(44) – H(44A)    | 109.5        | C(41) – C(44) – H(44B)    | 109.5        |
| H(44A) – C(44) – H(44B)   | 109.5        | C(41) – C(44) – H(44C)    | 109.5        |
| H(44A) – C(44) – H(44C)   | 109.5        | H(44B) – C(44) – H(44C)   | 109.5        |
| C(42) – C(45) – H(45A)    | 109.5        | C(42) – C(45) – H(45B)    | 109.5        |
| H(45A) – C(45) – H(45B)   | 109.5        | C(42) – C(45) – H(45C)    | 109.5        |
| H(45A) – C(45) – H(45C)   | 109.5        | H(45B) – C(45) – H(45C)   | 109.5        |
| C(42) – C(46) – H(46A)    | 109.5        | C(42) – C(46) – H(46B)    | 109.5        |
| H(46A) – C(46) – H(46B)   | 109.5        | C(42) – C(46) – H(46C)    | 109.5        |
| H(46A) – C(46) – H(46C)   | 109.5        | H(46B) – C(46) – H(46C)   | 109.5        |
| C(56) – C(51) – C(52)     | 119.7(2)     | C(56) – C(51) – S         | 119.41(19)   |
| C(52) – C(51) – S         | 120.8(2)     | C(51) – C(52) – C(53)     | 119.6(2)     |
| C(51) – C(52) – H(52)     | 120.2        | C(53) – C(52) – H(52)     | 120.2        |
| C(54) – C(53) – C(52)     | 120.3(2)     | C(54) – C(53) – H(53)     | 119.8        |
| C(52) – C(53) – H(53)     | 119.8        | C(53) – C(54) – C(55)     | 120.3(2)     |
| C(53) – C(54) – H(54)     | 119.8        | C(55) – C(54) – H(54)     | 119.8        |
| C(56) – C(55) – C(54)     | 119.5(3)     | C(56) – C(55) – H(55)     | 120.2        |
| C(54) – C(55) – H(55)     | 120.2        | C(55) – C(56) – C(51)     | 120.5(3)     |
| C(55) – C(56) – H(56)     | 119.8        | C(51) – C(56) – H(56)     | 119.8        |
| C(11) – C – C(21)         | 113.81(19)   | C(11) – C – S             | 108.65(16)   |
| C(21) – C – S             | 104.00(15)   | C(11) – C – Pd            | 115.27(16)   |
| C(21) – C – Pd            | 108.22(15)   | S – C – Pd                | 106.03(11)   |
| C(13) – C(14) – C(15)     | 116.9(2)     | C(13) – C(14) – C(10)     | 121.6(2)     |
| C(15) – C(14) – C(10)     | 121.4(2)     | C(15) – C(16) – C(11)     | 120.8(2)     |
| C(15) – C(16) – H(16)     | 119.6        | C(11) – C(16) – H(16)     | 119.6        |
| C(16) – C(15) – C(14)     | 121.9(2)     | C(16) – C(15) – H(15)     | 119.0        |
| C(14) – C(15) – H(15)     | 119.0        | C(12) – C(11) – C(16)     | 117.7(2)     |
| C(12) – C(11) – C         | 120.9(2)     | C(16) – C(11) – C         | 121.3(2)     |
| C(18) – C(10) – C(91)     | 68.7(4)      | C(18) – C(10) – C(93)     | 134.9(3)     |
| C(91) – C(10) – C(93)     | 112.5(4)     | C(18) – C(10) – C(19)     | 110.0(4)     |
| C(91) – C(10) – C(19)     | 142.3(4)     | C(18) – C(10) – C(14)     | 111.2(3)     |
| C(91) – C(10) – C(14)     | 107.7(3)     | C(93) – C(10) – C(14)     | 110.8(3)     |
| C(19) – C(10) – C(14)     | 107.5(3)     | C(91) – C(10) – C(96)     | 107.5(4)     |
| C(93) – C(10) – C(96)     | 106.6(4)     | C(19) – C(10) – C(96)     | 71.1(4)      |

Continued on next page

**Table S25.** – continued from previous page

| <b>atom – atom – atom</b> | <b>angle</b> | <b>atom – atom – atom</b> | <b>angle</b> |
|---------------------------|--------------|---------------------------|--------------|
| C(14) – C(10) – C(96)     | 111.7(3)     | C(18) – C(10) – C(17)     | 108.6(4)     |
| C(91) – C(10) – C(17)     | 45.2(3)      | C(93) – C(10) – C(17)     | 69.6(4)      |
| C(19) – C(10) – C(17)     | 107.9(4)     | C(14) – C(10) – C(17)     | 111.6(3)     |
| C(96) – C(10) – C(17)     | 134.6(3)     | C(72) – O(7) – C(73)      | 110.9(2)     |
| C(11) – C(12) – C(13)     | 120.5(2)     | C(11) – C(12) – P(1)      | 114.35(16)   |
| C(13) – C(12) – P(1)      | 125.15(19)   | S(6) – O(61) – Pd         | 128.95(11)   |
| C(72) – C(71) – H(71A)    | 109.5        | C(72) – C(71) – H(71B)    | 109.5        |
| H(71A) – C(71) – H(71B)   | 109.5        | C(72) – C(71) – H(71C)    | 109.5        |
| H(71A) – C(71) – H(71C)   | 109.5        | H(71B) – C(71) – H(71C)   | 109.5        |
| O(7) – C(72) – C(71)      | 110.1(2)     | O(7) – C(72) – H(72A)     | 109.6        |
| C(71) – C(72) – H(72A)    | 109.6        | O(7) – C(72) – H(72B)     | 109.6        |
| C(71) – C(72) – H(72B)    | 109.6        | H(72A) – C(72) – H(72B)   | 108.2        |
| O(7) – C(73) – C(74)      | 109.7(2)     | O(7) – C(73) – H(73A)     | 109.7        |
| C(74) – C(73) – H(73A)    | 109.7        | O(7) – C(73) – H(73B)     | 109.7        |
| C(74) – C(73) – H(73B)    | 109.7        | H(73A) – C(73) – H(73B)   | 108.2        |
| C(73) – C(74) – H(74A)    | 109.5        | C(73) – C(74) – H(74B)    | 109.5        |
| H(74A) – C(74) – H(74B)   | 109.5        | C(73) – C(74) – H(74C)    | 109.5        |
| H(74A) – C(74) – H(74C)   | 109.5        | H(74B) – C(74) – H(74C)   | 109.5        |
| C(10) – C(91) – H(91A)    | 109.5        | C(10) – C(91) – H(91B)    | 109.5        |
| C(10) – C(91) – H(91C)    | 109.5        | C(10) – C(93) – H(93A)    | 109.5        |
| C(10) – C(93) – H(93B)    | 109.5        | C(10) – C(93) – H(93C)    | 109.5        |
| C(10) – C(96) – H(96A)    | 109.5        | C(10) – C(96) – H(96B)    | 109.5        |
| C(10) – C(96) – H(96C)    | 109.5        | F(62) – C(6) – F(63)      | 108.0(2)     |
| F(62) – C(6) – F(61)      | 108.0(2)     | F(63) – C(6) – F(61)      | 107.5(2)     |
| F(62) – C(6) – S(6)       | 111.30(19)   | F(63) – C(6) – S(6)       | 110.91(19)   |
| F(61) – C(6) – S(6)       | 110.95(18)   | O(62) – S(6) – O(63)      | 116.10(14)   |
| O(62) – S(6) – O(61)      | 114.79(11)   | O(63) – S(6) – O(61)      | 114.14(12)   |
| O(62) – S(6) – C(6)       | 105.01(13)   | O(63) – S(6) – C(6)       | 103.55(13)   |
| O(61) – S(6) – C(6)       | 100.71(12)   |                           |              |

5.5 Crystal data for  $[\{\text{PC}(\text{sp}^3)(\text{SPh})\text{P}^t\text{BuPdSPh}\} \cdot \text{C}_5\text{H}_{12} (\mathbf{9} \cdot \text{C}_5\text{H}_{12})]$

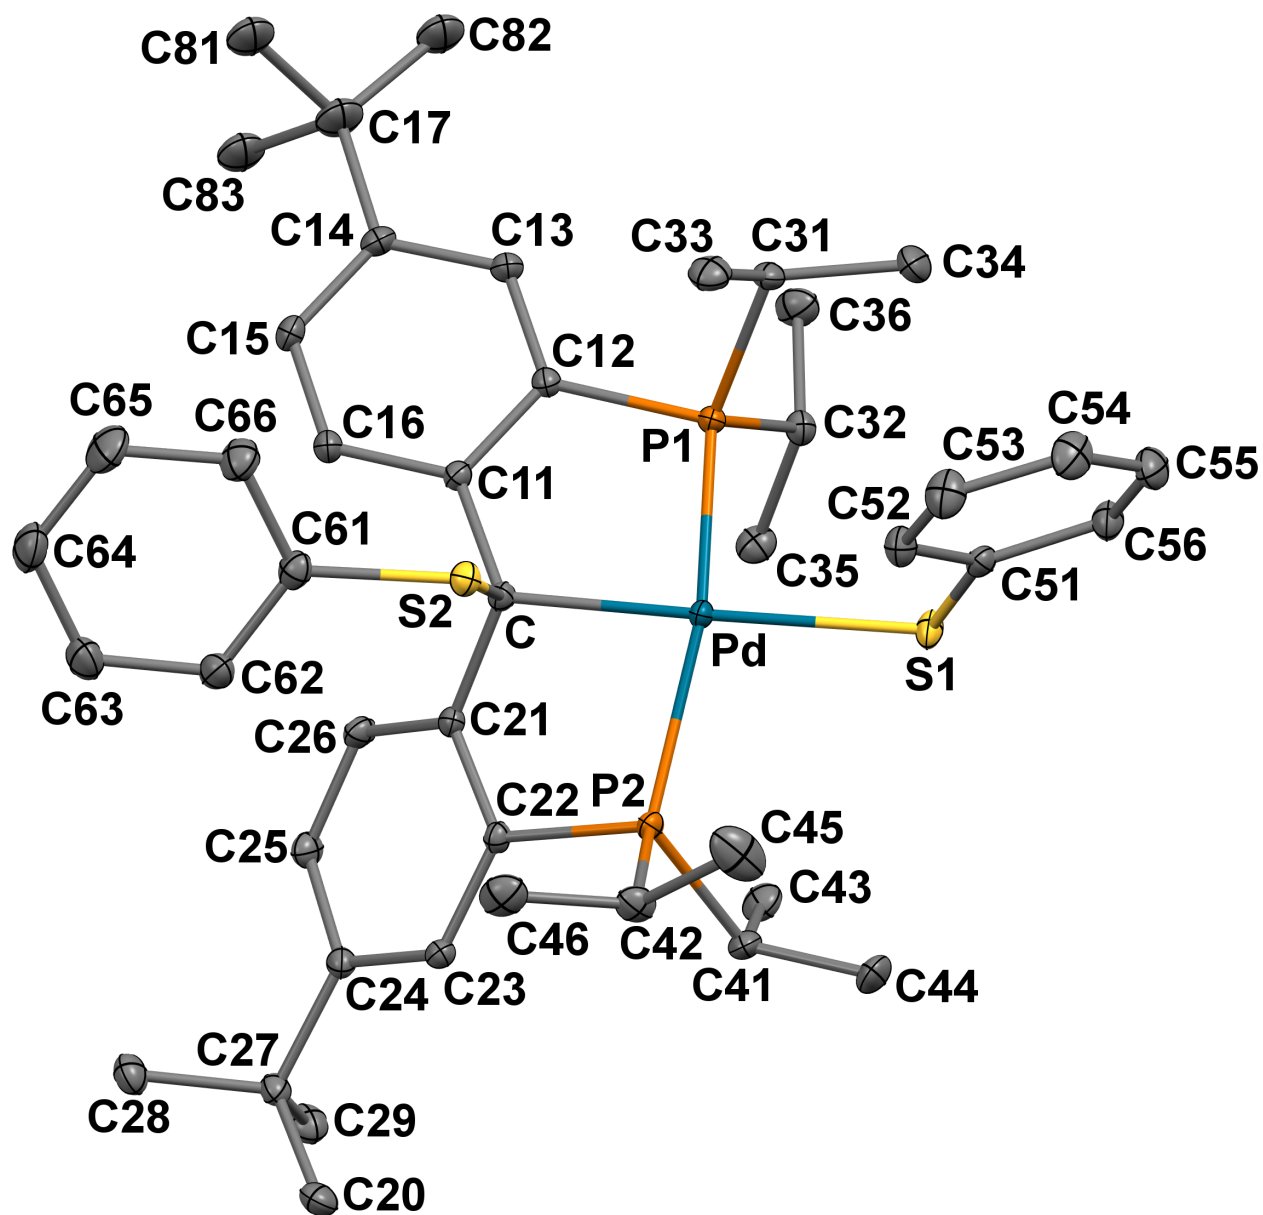

Figure S48. Thermal-ellipsoid representation of  $[\{\text{PC}(\text{sp}^3)(\text{SPh})\text{P}^t\text{BuPdSPh}\} \cdot \text{C}_5\text{H}_{12} (\mathbf{9} \cdot \text{C}_5\text{H}_{12})]$  at 50% probability. Hydrogen atoms and the solvent were omitted for clarity.

**Table S26.** Crystal data and structure refinement for  $[\{\text{PC}(\text{sp}^3)(\text{SPh})\text{P}\}^{\text{Bu}}\text{PdSPh}] \cdot \text{C}_5\text{H}_{12}$  (**9**·**C<sub>5</sub>H<sub>12</sub>**).

|                                          |                                                                    |                           |
|------------------------------------------|--------------------------------------------------------------------|---------------------------|
| Identification code:                     | pc36                                                               |                           |
| Empirical formula:                       | $\text{C}_{50}\text{H}_{74}\text{P}_2\text{PdS}_2$                 |                           |
| Formula weight:                          | 907.55                                                             |                           |
| Temperature:                             | 120(2) K                                                           |                           |
| Wavelength:                              | 0.71073 Å                                                          |                           |
| Crystal system:                          | Monoclinic                                                         |                           |
| Space group:                             | $P2_1/n$                                                           |                           |
| Unit cell dimensions:                    | $a = 11.297(3)$ Å                                                  | $\alpha = 90^\circ$       |
|                                          | $b = 11.590(3)$ Å                                                  | $\beta = 92.926(4)^\circ$ |
|                                          | $c = 36.768(10)$ Å                                                 | $\gamma = 90^\circ$       |
| Volume:                                  | $4808(2)$ Å <sup>3</sup>                                           |                           |
| Z:                                       | 4                                                                  |                           |
| Density (calculated):                    | $1.254$ g·cm <sup>-3</sup>                                         |                           |
| Absorption coefficient ( $\mu$ ):        | $0.571$ mm <sup>-1</sup>                                           |                           |
| F(000):                                  | 1928                                                               |                           |
| Crystal size:                            | $0.18 \times 0.13 \times 0.05$ mm <sup>3</sup>                     |                           |
| $\theta$ range for data collection:      | $1.84$ to $28.81^\circ$                                            |                           |
| Index ranges:                            | $-15 \leq h \leq 15$ , $-15 \leq k \leq 15$ , $-49 \leq l \leq 49$ |                           |
| Reflections collected:                   | 111329                                                             |                           |
| Independent reflections:                 | 12309 [ $R_{\text{int}} = 0.0632$ ]                                |                           |
| Completeness to $\theta = 25.00^\circ$ : | 100.0 %                                                            |                           |
| Absorption correction:                   | Semi-empirical from equivalents                                    |                           |
| Max. and min. transmission:              | 0.9737 and 0.9052                                                  |                           |
| Refinement method:                       | Full-matrix least-squares on $F^2$                                 |                           |
| Data / restraints / parameters:          | 12309 / 0 / 507                                                    |                           |
| Goodness-of-fit on $F^2$ :               | 1.055                                                              |                           |
| Final R indices [ $I > 2\sigma(I)$ ]:    | $R_1 = 0.0392$ , $wR_2 = 0.0754$                                   |                           |
| R indices (all data):                    | $R_1 = 0.0557$ , $wR_2 = 0.0807$                                   |                           |
| Largest diff. peak and hole:             | $1.121$ and $-0.773$ e <sup>-</sup> ·Å <sup>-3</sup>               |                           |

**Table S27.** Atomic coordinates and equivalent isotropic displacement parameters ( $\text{\AA}^2$ ) for  $[(\text{PC}(\text{sp}^3)(\text{SPh})\text{P})^t\text{BuPdSPh}]\cdot\text{C}_5\text{H}_{12}$  (**9**·**C<sub>5</sub>H<sub>12</sub>**).  $U(\text{eq})$  is defined as one third of the trace of the orthogonalized  $U_{ij}$  tensor

| atom  | x           | y           | z           | U(eq)    |
|-------|-------------|-------------|-------------|----------|
| Pd    | 0.66755(1)  | 0.33226(1)  | 0.65633(1)  | 0.013(1) |
| P(1)  | 0.60311(5)  | 0.17718(5)  | 0.62339(2)  | 0.015(1) |
| P(2)  | 0.67856(5)  | 0.50065(5)  | 0.69169(2)  | 0.015(1) |
| S(2)  | 0.62991(5)  | 0.51062(5)  | 0.60039(2)  | 0.018(1) |
| S(1)  | 0.80739(5)  | 0.21561(5)  | 0.69109(2)  | 0.020(1) |
| C     | 0.52947(18) | 0.42195(18) | 0.62720(6)  | 0.014(1) |
| C(81) | 0.2603(14)  | 0.1856(13)  | 0.4810(4)   | 0.038(1) |
| C(82) | 0.2746(14)  | 0.0154(13)  | 0.5212(4)   | 0.038(1) |
| C(83) | 0.1085(14)  | 0.1602(14)  | 0.5274(4)   | 0.038(1) |
| C(11) | 0.45293(18) | 0.34964(18) | 0.60063(6)  | 0.015(1) |
| C(13) | 0.41212(19) | 0.1660(2)   | 0.56986(6)  | 0.019(1) |
| C(12) | 0.47787(19) | 0.23220(19) | 0.59562(6)  | 0.015(1) |
| C(14) | 0.3179(2)   | 0.2125(2)   | 0.54849(6)  | 0.020(1) |
| C(15) | 0.2953(2)   | 0.3298(2)   | 0.55301(6)  | 0.020(1) |
| C(16) | 0.36096(19) | 0.39710(19) | 0.57800(6)  | 0.018(1) |
| C(20) | 0.3832(2)   | 0.8244(2)   | 0.74525(7)  | 0.026(1) |
| C(17) | 0.2437(3)   | 0.1355(3)   | 0.52208(8)  | 0.038(1) |
| C(21) | 0.46384(18) | 0.49475(19) | 0.65410(6)  | 0.015(1) |
| C(22) | 0.52960(18) | 0.55551(19) | 0.68147(6)  | 0.015(1) |
| C(23) | 0.47674(19) | 0.63820(18) | 0.70291(6)  | 0.015(1) |
| C(24) | 0.35476(19) | 0.6583(2)   | 0.70017(6)  | 0.017(1) |
| C(25) | 0.28803(19) | 0.5872(2)   | 0.67633(6)  | 0.020(1) |
| C(26) | 0.34027(19) | 0.5081(2)   | 0.65364(6)  | 0.019(1) |
| C(27) | 0.2936(2)   | 0.7492(2)   | 0.72323(6)  | 0.019(1) |
| C(29) | 0.2145(2)   | 0.6876(2)   | 0.74974(7)  | 0.027(1) |
| C(28) | 0.2175(2)   | 0.8283(2)   | 0.69814(7)  | 0.026(1) |
| C(18) | 0.1847(3)   | 0.0398(3)   | 0.54402(10) | 0.038(1) |
| C(19) | 0.1480(3)   | 0.2012(3)   | 0.50109(11) | 0.038(1) |
| C(10) | 0.3250(3)   | 0.0780(3)   | 0.49550(10) | 0.038(1) |
| C(31) | 0.6946(2)   | 0.1043(2)   | 0.59014(6)  | 0.020(1) |
| C(34) | 0.7847(2)   | 0.0192(2)   | 0.60713(7)  | 0.029(1) |
| C(33) | 0.7547(2)   | 0.1963(2)   | 0.56757(7)  | 0.026(1) |
| C(32) | 0.5481(2)   | 0.06348(19) | 0.65326(6)  | 0.019(1) |
| C(36) | 0.4858(2)   | -0.0380(2)  | 0.63387(7)  | 0.028(1) |
| C(35) | 0.4699(2)   | 0.1179(2)   | 0.68125(7)  | 0.024(1) |
| C(46) | 0.7487(3)   | 0.7200(2)   | 0.66445(8)  | 0.031(1) |
| C(45) | 0.9093(2)   | 0.5803(3)   | 0.68443(10) | 0.043(1) |
| C(44) | 0.7940(2)   | 0.4445(2)   | 0.75947(7)  | 0.031(1) |
| C(43) | 0.5836(2)   | 0.3770(2)   | 0.74820(7)  | 0.027(1) |
| C(42) | 0.7846(2)   | 0.6240(2)   | 0.69101(7)  | 0.023(1) |
| C(41) | 0.6728(2)   | 0.4724(2)   | 0.74121(6)  | 0.020(1) |
| C(51) | 0.94000(19) | 0.2148(2)   | 0.66798(6)  | 0.018(1) |
| C(52) | 0.9666(2)   | 0.2989(2)   | 0.64256(7)  | 0.022(1) |
| C(53) | 1.0734(2)   | 0.2963(2)   | 0.62527(8)  | 0.030(1) |
| C(54) | 1.1551(2)   | 0.2096(3)   | 0.63303(8)  | 0.031(1) |
| C(55) | 1.1294(2)   | 0.1251(2)   | 0.65777(7)  | 0.029(1) |
| C(61) | 0.5376(2)   | 0.6066(2)   | 0.57342(7)  | 0.021(1) |
| C(62) | 0.4662(2)   | 0.6888(2)   | 0.58922(7)  | 0.025(1) |

Continued on next page

**Table S27.** – continued from previous page

| atom   | x         | y         | x           | U(eq)    |
|--------|-----------|-----------|-------------|----------|
| C(63)  | 0.3918(2) | 0.7582(2) | 0.56731(8)  | 0.031(1) |
| C(64)  | 0.3908(3) | 0.7490(2) | 0.52976(8)  | 0.036(1) |
| C(65)  | 0.4652(3) | 0.6715(3) | 0.51387(8)  | 0.038(1) |
| C(66)  | 0.5379(2) | 0.5993(2) | 0.53561(7)  | 0.030(1) |
| C(71)  | 1.0305(5) | 0.7891(5) | 0.59853(14) | 0.093(2) |
| C(72)  | 1.0855(4) | 0.6757(6) | 0.59781(14) | 0.097(2) |
| C(73)  | 1.0469(4) | 0.6008(4) | 0.56676(15) | 0.081(2) |
| C(74)  | 0.9260(4) | 0.5569(4) | 0.56704(12) | 0.070(1) |
| C(75)  | 0.8881(4) | 0.4721(4) | 0.53574(14) | 0.087(2) |
| C(56)  | 1.0231(2) | 0.1271(2) | 0.67515(7)  | 0.023(1) |
| H(81A) | 0.2132    | 0.1391    | 0.4633      | 0.057    |
| H(81B) | 0.3441    | 0.1816    | 0.4754      | 0.057    |
| H(81C) | 0.2335    | 0.2660    | 0.4797      | 0.057    |
| H(82A) | 0.2204    | -0.0250   | 0.5038      | 0.046    |
| H(82B) | 0.2685    | -0.0180   | 0.5455      | 0.046    |
| H(82C) | 0.3561    | 0.0073    | 0.5136      | 0.046    |
| H(83A) | 0.0934    | 0.2432    | 0.5251      | 0.057    |
| H(83B) | 0.0879    | 0.1341    | 0.5516      | 0.057    |
| H(83C) | 0.0602    | 0.1187    | 0.5088      | 0.057    |
| H(13)  | 0.4322    | 0.0871    | 0.5668      | 0.023    |
| H(15)  | 0.2331    | 0.3649    | 0.5386      | 0.024    |
| H(16)  | 0.3434    | 0.4770    | 0.5799      | 0.021    |
| H(20A) | 0.4356    | 0.8630    | 0.7286      | 0.039    |
| H(20B) | 0.4305    | 0.7758    | 0.7623      | 0.039    |
| H(20C) | 0.3407    | 0.8826    | 0.7589      | 0.039    |
| H(23)  | 0.5249    | 0.6819    | 0.7198      | 0.019    |
| H(25)  | 0.2041    | 0.5931    | 0.6756      | 0.024    |
| H(26)  | 0.2915    | 0.4623    | 0.6375      | 0.022    |
| H(29A) | 0.1541    | 0.6424    | 0.7360      | 0.040    |
| H(29B) | 0.1757    | 0.7448    | 0.7647      | 0.040    |
| H(29C) | 0.2630    | 0.6361    | 0.7655      | 0.040    |
| H(28A) | 0.2678    | 0.8659    | 0.6807      | 0.039    |
| H(28B) | 0.1796    | 0.8871    | 0.7128      | 0.039    |
| H(28C) | 0.1565    | 0.7824    | 0.6849      | 0.039    |
| H(18A) | 0.1391    | -0.0112   | 0.5273      | 0.057    |
| H(18B) | 0.1315    | 0.0749    | 0.5611      | 0.057    |
| H(18C) | 0.2459    | -0.0049   | 0.5575      | 0.057    |
| H(19A) | 0.1839    | 0.2630    | 0.4871      | 0.057    |
| H(19B) | 0.0935    | 0.2348    | 0.5181      | 0.057    |
| H(19C) | 0.1043    | 0.1487    | 0.4844      | 0.057    |
| H(10A) | 0.2786    | 0.0250    | 0.4796      | 0.057    |
| H(10B) | 0.3873    | 0.0349    | 0.5092      | 0.057    |
| H(10C) | 0.3613    | 0.1372    | 0.4806      | 0.057    |
| H(31)  | 0.6398    | 0.0597    | 0.5732      | 0.024    |
| H(34A) | 0.8293    | -0.0165   | 0.5879      | 0.043    |
| H(34B) | 0.7431    | -0.0408   | 0.6203      | 0.043    |
| H(34C) | 0.8395    | 0.0602    | 0.6241      | 0.043    |
| H(33A) | 0.7952    | 0.1591    | 0.5478      | 0.039    |
| H(33B) | 0.8124    | 0.2388    | 0.5832      | 0.039    |
| H(33C) | 0.6947    | 0.2499    | 0.5573      | 0.039    |
| H(32)  | 0.6189    | 0.0311    | 0.6671      | 0.022    |

Continued on next page

**Table S27.** – continued from previous page

| atom   | x      | y       | x      | U(eq) |
|--------|--------|---------|--------|-------|
| H(36A) | 0.4077 | -0.0133 | 0.6240 | 0.043 |
| H(36B) | 0.4765 | -0.1011 | 0.6512 | 0.043 |
| H(36C) | 0.5335 | -0.0645 | 0.6140 | 0.043 |
| H(35A) | 0.4009 | 0.1542  | 0.6687 | 0.035 |
| H(35B) | 0.5154 | 0.1763  | 0.6952 | 0.035 |
| H(35C) | 0.4432 | 0.0581  | 0.6978 | 0.035 |
| H(46A) | 0.7457 | 0.6898  | 0.6395 | 0.047 |
| H(46B) | 0.8070 | 0.7826  | 0.6666 | 0.047 |
| H(46C) | 0.6705 | 0.7496  | 0.6701 | 0.047 |
| H(45A) | 0.9133 | 0.5561  | 0.6590 | 0.064 |
| H(45B) | 0.9279 | 0.5145  | 0.7005 | 0.064 |
| H(45C) | 0.9668 | 0.6422  | 0.6896 | 0.064 |
| H(44A) | 0.8276 | 0.3771  | 0.7477 | 0.046 |
| H(44B) | 0.7850 | 0.4278  | 0.7853 | 0.046 |
| H(44C) | 0.8470 | 0.5107  | 0.7571 | 0.046 |
| H(43A) | 0.5077 | 0.3951  | 0.7354 | 0.041 |
| H(43B) | 0.5725 | 0.3713  | 0.7744 | 0.041 |
| H(43C) | 0.6135 | 0.3034  | 0.7393 | 0.041 |
| H(42)  | 0.7877 | 0.6587  | 0.7159 | 0.028 |
| H(41)  | 0.6436 | 0.5444  | 0.7528 | 0.024 |
| H(52)  | 0.9112 | 0.3587  | 0.6370 | 0.026 |
| H(53)  | 1.0902 | 0.3544  | 0.6080 | 0.036 |
| H(54)  | 1.2283 | 0.2084  | 0.6214 | 0.037 |
| H(55)  | 1.1849 | 0.0650  | 0.6630 | 0.034 |
| H(62)  | 0.4684 | 0.6974  | 0.6149 | 0.030 |
| H(63)  | 0.3412 | 0.8122  | 0.5782 | 0.038 |
| H(64)  | 0.3391 | 0.7961  | 0.5150 | 0.043 |
| H(65)  | 0.4669 | 0.6672  | 0.4881 | 0.046 |
| H(66)  | 0.5878 | 0.5450  | 0.5246 | 0.036 |
| H(71A) | 1.0488 | 0.8318  | 0.5765 | 0.139 |
| H(71B) | 1.0612 | 0.8314  | 0.6201 | 0.139 |
| H(71C) | 0.9444 | 0.7804  | 0.5995 | 0.139 |
| H(72A) | 1.0689 | 0.6351  | 0.6207 | 0.116 |
| H(72B) | 1.1724 | 0.6862  | 0.5975 | 0.116 |
| H(73A) | 1.0550 | 0.6448  | 0.5440 | 0.097 |
| H(73B) | 1.1015 | 0.5342  | 0.5662 | 0.097 |
| H(74A) | 0.8711 | 0.6235  | 0.5660 | 0.084 |
| H(74B) | 0.9163 | 0.5173  | 0.5905 | 0.084 |
| H(75A) | 0.8951 | 0.5106  | 0.5122 | 0.130 |
| H(75B) | 0.8056 | 0.4484  | 0.5383 | 0.130 |
| H(75C) | 0.9395 | 0.4040  | 0.5370 | 0.130 |
| H(56)  | 1.0066 | 0.0682  | 0.6921 | 0.027 |



**Table S28.** Anisotropic displacement parameters ( $\text{\AA}^2$ ) for  $[\{\text{PC}(\text{sp}^3)(\text{SPh})\text{P}\}^{\text{tBu}}\text{PdSPh}] \cdot \text{C}_5\text{H}_{12}$  ( $\mathbf{9} \cdot \text{C}_5\text{H}_{12}$ ). The anisotropic displacement factor exponent takes the form:  $-2\pi^2[h^2a^*{}^2U_{11} + \dots + 2hka^*b^*U_{12}]$ .

| atom  | $U_{11}$   | $U_{22}$   | $U_{33}$   | $U_{23}$    | $U_{13}$    | $U_{12}$    |
|-------|------------|------------|------------|-------------|-------------|-------------|
| Pd    | 0.0116(1)  | 0.0139(1)  | 0.0123(1)  | -0.0006(1)  | -0.0019(1)  | 0.0021(1)   |
| P(1)  | 0.0163(3)  | 0.0136(3)  | 0.0134(3)  | -0.0018(2)  | -0.0019(2)  | 0.0028(2)   |
| P(2)  | 0.0124(2)  | 0.0157(3)  | 0.0155(3)  | -0.0023(2)  | -0.0031(2)  | 0.0012(2)   |
| S(2)  | 0.0179(3)  | 0.0185(3)  | 0.0177(3)  | 0.0014(2)   | 0.0006(2)   | 0.0001(2)   |
| S(1)  | 0.0160(3)  | 0.0251(3)  | 0.0178(3)  | 0.0055(2)   | -0.0003(2)  | 0.0059(2)   |
| C     | 0.0130(10) | 0.0146(10) | 0.0147(11) | 0.0002(8)   | -0.0020(8)  | 0.0008(8)   |
| C(81) | 0.0439(10) | 0.0323(9)  | 0.0364(10) | -0.0104(7)  | -0.0165(8)  | -0.0039(7)  |
| C(82) | 0.0439(10) | 0.0323(9)  | 0.0364(10) | -0.0104(7)  | -0.0165(8)  | -0.0039(7)  |
| C(83) | 0.0439(10) | 0.0323(9)  | 0.0364(10) | -0.0104(7)  | -0.0165(8)  | -0.0039(7)  |
| C(11) | 0.0146(10) | 0.0162(11) | 0.0135(10) | -0.0007(8)  | -0.0009(8)  | 0.0003(8)   |
| C(13) | 0.0220(11) | 0.0171(10) | 0.0168(11) | -0.0033(9)  | -0.0029(8)  | 0.0019(9)   |
| C(12) | 0.0161(10) | 0.0159(10) | 0.0143(11) | -0.0002(8)  | 0.0001(8)   | 0.0027(8)   |
| C(14) | 0.0230(11) | 0.0217(11) | 0.0141(11) | -0.0034(9)  | -0.0034(9)  | 0.0004(9)   |
| C(15) | 0.0207(11) | 0.0223(11) | 0.0164(11) | 0.0013(10)  | -0.0053(8)  | 0.0038(10)  |
| C(16) | 0.0184(10) | 0.0165(11) | 0.0172(11) | -0.0003(9)  | -0.0022(9)  | 0.0037(8)   |
| C(20) | 0.0274(12) | 0.0241(12) | 0.0264(13) | -0.0080(11) | 0.0016(10)  | 0.0064(10)  |
| C(17) | 0.0439(10) | 0.0323(9)  | 0.0364(10) | -0.0104(7)  | -0.0165(8)  | -0.0039(7)  |
| C(21) | 0.0160(10) | 0.0141(10) | 0.0135(10) | 0.0007(8)   | -0.0022(8)  | 0.0022(8)   |
| C(22) | 0.0119(9)  | 0.0161(10) | 0.0161(11) | 0.0006(8)   | -0.0016(8)  | 0.0005(8)   |
| C(23) | 0.0163(10) | 0.0156(10) | 0.0143(11) | -0.0012(8)  | -0.0018(8)  | 0.0004(8)   |
| C(24) | 0.0178(10) | 0.0180(11) | 0.0152(10) | 0.0010(9)   | 0.0003(8)   | 0.0038(9)   |
| C(25) | 0.0126(10) | 0.0254(12) | 0.0211(12) | -0.0019(10) | -0.0008(9)  | 0.0028(9)   |
| C(26) | 0.0154(10) | 0.0223(11) | 0.0175(11) | -0.0034(9)  | -0.0034(8)  | -0.0004(9)  |
| C(27) | 0.0186(11) | 0.0210(11) | 0.0174(12) | -0.0002(9)  | 0.0017(9)   | 0.0053(9)   |
| C(29) | 0.0288(13) | 0.0277(14) | 0.0250(13) | 0.0010(10)  | 0.0073(10)  | 0.0037(10)  |
| C(28) | 0.0229(11) | 0.0250(12) | 0.0298(13) | 0.0011(11)  | 0.0032(10)  | 0.0076(10)  |
| C(18) | 0.0439(10) | 0.0323(9)  | 0.0364(10) | -0.0104(7)  | -0.0165(8)  | -0.0039(7)  |
| C(19) | 0.0439(10) | 0.0323(9)  | 0.0364(10) | -0.0104(7)  | -0.0165(8)  | -0.0039(7)  |
| C(10) | 0.0439(10) | 0.0323(9)  | 0.0364(10) | -0.0104(7)  | -0.0165(8)  | -0.0039(7)  |
| C(31) | 0.0204(11) | 0.0221(12) | 0.0163(11) | -0.0067(9)  | -0.0004(9)  | 0.0047(9)   |
| C(34) | 0.0282(13) | 0.0286(14) | 0.0283(14) | -0.0065(11) | -0.0031(11) | 0.0124(11)  |
| C(33) | 0.0274(13) | 0.0322(14) | 0.0199(13) | -0.0034(10) | 0.0062(10)  | 0.0021(10)  |
| C(32) | 0.0199(11) | 0.0173(11) | 0.0187(12) | 0.0017(9)   | -0.0011(9)  | 0.0022(9)   |
| C(36) | 0.0374(14) | 0.0205(12) | 0.0271(14) | 0.0002(10)  | -0.0005(11) | -0.0063(11) |
| C(35) | 0.0229(12) | 0.0268(13) | 0.0214(13) | 0.0014(10)  | 0.0032(10)  | -0.0026(10) |
| C(46) | 0.0360(15) | 0.0251(13) | 0.0329(15) | 0.0000(11)  | -0.0017(12) | -0.0110(11) |
| C(45) | 0.0183(13) | 0.0355(16) | 0.075(2)   | -0.0116(16) | 0.0072(14)  | -0.0071(11) |
| C(44) | 0.0313(14) | 0.0332(14) | 0.0255(14) | -0.0043(11) | -0.0148(11) | 0.0060(11)  |
| C(43) | 0.0327(14) | 0.0314(13) | 0.0173(12) | 0.0033(10)  | 0.0007(10)  | 0.0014(11)  |
| C(42) | 0.0176(11) | 0.0222(12) | 0.0302(14) | -0.0051(10) | -0.0006(10) | -0.0040(9)  |
| C(41) | 0.0244(12) | 0.0227(12) | 0.0136(11) | -0.0042(9)  | -0.0038(9)  | 0.0043(9)   |
| C(51) | 0.0160(10) | 0.0198(11) | 0.0169(11) | -0.0026(9)  | -0.0039(8)  | 0.0007(9)   |
| C(52) | 0.0187(11) | 0.0227(12) | 0.0246(13) | 0.0030(9)   | -0.0013(9)  | 0.0015(9)   |
| C(53) | 0.0249(13) | 0.0365(15) | 0.0295(14) | 0.0086(11)  | 0.0046(11)  | -0.0001(11) |
| C(54) | 0.0164(11) | 0.0463(16) | 0.0306(15) | 0.0018(12)  | 0.0054(10)  | 0.0031(11)  |
| C(55) | 0.0219(12) | 0.0344(14) | 0.0293(14) | -0.0010(11) | -0.0001(10) | 0.0106(10)  |
| C(61) | 0.0226(11) | 0.0197(12) | 0.0209(12) | 0.0039(9)   | -0.0012(9)  | -0.0022(9)  |
| C(62) | 0.0326(13) | 0.0184(12) | 0.0236(13) | 0.0002(9)   | -0.0047(10) | 0.0002(10)  |
| C(63) | 0.0352(15) | 0.0206(12) | 0.0377(16) | 0.0000(11)  | -0.0049(12) | 0.0045(11)  |

Continued on next page

**Table S28.** – continued from previous page

| atom  | U <sub>11</sub> | U <sub>22</sub> | U <sub>33</sub> | U <sub>23</sub> | U <sub>13</sub> | U <sub>12</sub> |
|-------|-----------------|-----------------|-----------------|-----------------|-----------------|-----------------|
| C(64) | 0.0415(16)      | 0.0302(14)      | 0.0338(16)      | 0.0094(12)      | -0.0115(13)     | 0.0042(12)      |
| C(65) | 0.0478(17)      | 0.0445(17)      | 0.0216(14)      | 0.0097(13)      | -0.0020(12)     | 0.0039(15)      |
| C(66) | 0.0323(14)      | 0.0358(15)      | 0.0225(14)      | 0.0047(11)      | 0.0028(11)      | 0.0044(12)      |
| C(71) | 0.092(4)        | 0.114(5)        | 0.069(3)        | 0.015(3)        | -0.016(3)       | -0.004(3)       |
| C(72) | 0.043(2)        | 0.174(6)        | 0.073(3)        | 0.052(4)        | 0.004(2)        | 0.011(3)        |
| C(73) | 0.060(3)        | 0.083(3)        | 0.101(4)        | 0.040(3)        | 0.022(3)        | 0.014(2)        |
| C(74) | 0.060(2)        | 0.085(3)        | 0.065(3)        | 0.024(2)        | 0.009(2)        | 0.029(2)        |
| C(75) | 0.103(4)        | 0.051(2)        | 0.114(4)        | 0.023(3)        | 0.074(3)        | 0.018(2)        |
| C(56) | 0.0211(11)      | 0.0247(12)      | 0.0223(12)      | 0.0038(10)      | -0.0006(9)      | 0.0048(9)       |

**Table S29.** Distances [Å] for  $[\{\text{PC}(\text{sp}^3)(\text{SPh})\text{P}\}^{\text{Bu}}\text{PdSPh}] \cdot \text{C}_5\text{H}_{12}$  (**9**·**C<sub>5</sub>H<sub>12</sub>**).

| atom – atom    | distance  | atom – atom    | distance  |
|----------------|-----------|----------------|-----------|
| Pd – C         | 2.119(2)  | Pd – P(1)      | 2.2666(7) |
| Pd – P(2)      | 2.3449(8) | Pd – S(1)      | 2.3980(7) |
| P(1) – C(12)   | 1.818(2)  | P(1) – C(32)   | 1.844(2)  |
| P(1) – C(31)   | 1.846(2)  | P(2) – C(22)   | 1.820(2)  |
| P(2) – C(41)   | 1.854(2)  | P(2) – C(42)   | 1.866(2)  |
| S(2) – C(61)   | 1.789(2)  | S(2) – C       | 1.852(2)  |
| S(1) – C(51)   | 1.760(2)  | C – C(21)      | 1.521(3)  |
| C – C(11)      | 1.523(3)  | C(81) – C(17)  | 1.638(16) |
| C(81) – H(81A) | 0.9800    | C(81) – H(81B) | 0.9800    |
| C(81) – H(81C) | 0.9800    | C(82) – C(17)  | 1.436(15) |
| C(82) – H(82A) | 0.9800    | C(82) – H(82B) | 0.9800    |
| C(82) – H(82C) | 0.9800    | C(83) – C(17)  | 1.575(16) |
| C(83) – H(83A) | 0.9800    | C(83) – H(83B) | 0.9800    |
| C(83) – H(83C) | 0.9800    | C(11) – C(12)  | 1.404(3)  |
| C(11) – C(16)  | 1.409(3)  | C(13) – C(14)  | 1.399(3)  |
| C(13) – C(12)  | 1.402(3)  | C(13) – H(13)  | 0.9500    |
| C(14) – C(15)  | 1.395(3)  | C(14) – C(17)  | 1.536(3)  |
| C(15) – C(16)  | 1.390(3)  | C(15) – H(15)  | 0.9500    |
| C(16) – H(16)  | 0.9500    | C(20) – C(27)  | 1.536(3)  |
| C(20) – H(20A) | 0.9800    | C(20) – H(20B) | 0.9800    |
| C(20) – H(20C) | 0.9800    | C(17) – C(19)  | 1.503(5)  |
| C(17) – C(10)  | 1.528(5)  | C(17) – C(18)  | 1.543(5)  |
| C(21) – C(26)  | 1.404(3)  | C(21) – C(22)  | 1.409(3)  |
| C(22) – C(23)  | 1.395(3)  | C(23) – C(24)  | 1.396(3)  |
| C(23) – H(23)  | 0.9500    | C(24) – C(25)  | 1.396(3)  |
| C(24) – C(27)  | 1.538(3)  | C(25) – C(26)  | 1.391(3)  |
| C(25) – H(25)  | 0.9500    | C(26) – H(26)  | 0.9500    |
| C(27) – C(29)  | 1.532(3)  | C(27) – C(28)  | 1.532(3)  |
| C(29) – H(29A) | 0.9800    | C(29) – H(29B) | 0.9800    |
| C(29) – H(29C) | 0.9800    | C(28) – H(28A) | 0.9800    |
| C(28) – H(28B) | 0.9800    | C(28) – H(28C) | 0.9800    |
| C(18) – H(18A) | 0.9800    | C(18) – H(18B) | 0.9800    |
| C(18) – H(18C) | 0.9800    | C(19) – H(19A) | 0.9800    |
| C(19) – H(19B) | 0.9800    | C(19) – H(19C) | 0.9800    |
| C(10) – H(10A) | 0.9800    | C(10) – H(10B) | 0.9800    |
| C(10) – H(10C) | 0.9800    | C(31) – C(34)  | 1.528(3)  |
| C(31) – C(33)  | 1.531(3)  | C(31) – H(31)  | 1.0000    |
| C(34) – H(34A) | 0.9800    | C(34) – H(34B) | 0.9800    |
| C(34) – H(34C) | 0.9800    | C(33) – H(33A) | 0.9800    |
| C(33) – H(33B) | 0.9800    | C(33) – H(33C) | 0.9800    |
| C(32) – C(35)  | 1.526(3)  | C(32) – C(36)  | 1.528(3)  |
| C(32) – H(32)  | 1.0000    | C(36) – H(36A) | 0.9800    |
| C(36) – H(36B) | 0.9800    | C(36) – H(36C) | 0.9800    |
| C(35) – H(35A) | 0.9800    | C(35) – H(35B) | 0.9800    |
| C(35) – H(35C) | 0.9800    | C(46) – C(42)  | 1.522(4)  |
| C(46) – H(46A) | 0.9800    | C(46) – H(46B) | 0.9800    |
| C(46) – H(46C) | 0.9800    | C(45) – C(42)  | 1.528(4)  |
| C(45) – H(45A) | 0.9800    | C(45) – H(45B) | 0.9800    |
| C(45) – H(45C) | 0.9800    | C(44) – C(41)  | 1.528(3)  |
| C(44) – H(44A) | 0.9800    | C(44) – H(44B) | 0.9800    |

Continued on next page

**Table S29.** – continued from previous page

| <b>atom – atom</b> | <b>distance</b> | <b>atom – atom</b> | <b>distance</b> |
|--------------------|-----------------|--------------------|-----------------|
| C(44) – H(44C)     | 0.9800          | C(43) – C(41)      | 1.526(4)        |
| C(43) – H(43A)     | 0.9800          | C(43) – H(43B)     | 0.9800          |
| C(43) – H(43C)     | 0.9800          | C(42) – H(42)      | 1.0000          |
| C(41) – H(41)      | 1.0000          | C(51) – C(52)      | 1.393(3)        |
| C(51) – C(56)      | 1.400(3)        | C(52) – C(53)      | 1.392(3)        |
| C(52) – H(52)      | 0.9500          | C(53) – C(54)      | 1.385(4)        |
| C(53) – H(53)      | 0.9500          | C(54) – C(55)      | 1.378(4)        |
| C(54) – H(54)      | 0.9500          | C(55) – C(56)      | 1.389(3)        |
| C(55) – H(55)      | 0.9500          | C(61) – C(66)      | 1.393(4)        |
| C(61) – C(62)      | 1.394(3)        | C(62) – C(63)      | 1.390(3)        |
| C(62) – H(62)      | 0.9500          | C(63) – C(64)      | 1.384(4)        |
| C(63) – H(63)      | 0.9500          | C(64) – C(65)      | 1.381(4)        |
| C(64) – H(64)      | 0.9500          | C(65) – C(66)      | 1.395(4)        |
| C(65) – H(65)      | 0.9500          | C(66) – H(66)      | 0.9500          |
| C(71) – C(72)      | 1.454(7)        | C(71) – H(71A)     | 0.9800          |
| C(71) – H(71B)     | 0.9800          | C(71) – H(71C)     | 0.9800          |
| C(72) – C(73)      | 1.482(7)        | C(72) – H(72A)     | 0.9900          |
| C(72) – H(72B)     | 0.9900          | C(73) – C(74)      | 1.457(6)        |
| C(73) – H(73A)     | 0.9900          | C(73) – H(73B)     | 0.9900          |
| C(74) – C(75)      | 1.557(7)        | C(74) – H(74A)     | 0.9900          |
| C(74) – H(74B)     | 0.9900          | C(75) – H(75A)     | 0.9800          |
| C(75) – H(75B)     | 0.9800          | C(75) – H(75C)     | 0.9800          |
| C(56) – H(56)      | 0.9500          |                    |                 |

**Table S30.** Angles [°] for  $[\{\text{PC}(\text{sp}^3)(\text{SPh})\text{P}\}^t\text{BuPdSPh}]\cdot\text{C}_5\text{H}_{12}$  (**9**·**C<sub>5</sub>H<sub>12</sub>**).

| atom – atom – atom      | angle      | atom – atom – atom      | angle      |
|-------------------------|------------|-------------------------|------------|
| C – Pd – P(1)           | 84.89(6)   | C – Pd – P(2)           | 83.61(6)   |
| P(1) – Pd – P(2)        | 164.32(2)  | C – Pd – S(1)           | 173.64(6)  |
| P(1) – Pd – S(1)        | 91.29(3)   | P(2) – Pd – S(1)        | 99.15(3)   |
| C(12) – P(1) – C(32)    | 107.99(11) | C(12) – P(1) – C(31)    | 103.58(10) |
| C(32) – P(1) – C(31)    | 106.54(11) | C(12) – P(1) – Pd       | 103.98(7)  |
| C(32) – P(1) – Pd       | 110.94(8)  | C(31) – P(1) – Pd       | 122.78(8)  |
| C(22) – P(2) – C(41)    | 100.72(10) | C(22) – P(2) – C(42)    | 108.48(11) |
| C(41) – P(2) – C(42)    | 101.73(11) | C(22) – P(2) – Pd       | 98.86(7)   |
| C(41) – P(2) – Pd       | 113.19(8)  | C(42) – P(2) – Pd       | 130.25(8)  |
| C(61) – S(2) – C        | 106.53(10) | C(51) – S(1) – Pd       | 107.43(8)  |
| C(21) – C – C(11)       | 116.28(18) | C(21) – C – S(2)        | 111.75(15) |
| C(11) – C – S(2)        | 107.88(15) | C(21) – C – Pd          | 108.31(14) |
| C(11) – C – Pd          | 115.69(14) | S(2) – C – Pd           | 94.94(9)   |
| C(17) – C(81) – H(81A)  | 109.5      | C(17) – C(81) – H(81B)  | 109.5      |
| H(81A) – C(81) – H(81B) | 109.5      | C(17) – C(81) – H(81C)  | 109.5      |
| H(81A) – C(81) – H(81C) | 109.5      | H(81B) – C(81) – H(81C) | 109.5      |
| C(17) – C(82) – H(82A)  | 109.5      | C(17) – C(82) – H(82B)  | 109.5      |
| H(82A) – C(82) – H(82B) | 109.5      | C(17) – C(82) – H(82C)  | 109.5      |
| H(82A) – C(82) – H(82C) | 109.5      | H(82B) – C(82) – H(82C) | 109.5      |
| C(17) – C(83) – H(83A)  | 109.5      | C(17) – C(83) – H(83B)  | 109.5      |
| H(83A) – C(83) – H(83B) | 109.5      | C(17) – C(83) – H(83C)  | 109.5      |
| H(83A) – C(83) – H(83C) | 109.5      | H(83B) – C(83) – H(83C) | 109.5      |
| C(12) – C(11) – C(16)   | 116.6(2)   | C(12) – C(11) – C       | 120.44(19) |
| C(16) – C(11) – C       | 122.78(19) | C(14) – C(13) – C(12)   | 122.0(2)   |
| C(14) – C(13) – H(13)   | 119.0      | C(12) – C(13) – H(13)   | 119.0      |
| C(13) – C(12) – C(11)   | 121.1(2)   | C(13) – C(12) – P(1)    | 123.91(17) |
| C(11) – C(12) – P(1)    | 114.97(16) | C(15) – C(14) – C(13)   | 116.6(2)   |
| C(15) – C(14) – C(17)   | 123.0(2)   | C(13) – C(14) – C(17)   | 120.4(2)   |
| C(16) – C(15) – C(14)   | 122.1(2)   | C(16) – C(15) – H(15)   | 119.0      |
| C(14) – C(15) – H(15)   | 119.0      | C(15) – C(16) – C(11)   | 121.6(2)   |
| C(15) – C(16) – H(16)   | 119.2      | C(11) – C(16) – H(16)   | 119.2      |
| C(27) – C(20) – H(20A)  | 109.5      | C(27) – C(20) – H(20B)  | 109.5      |
| H(20A) – C(20) – H(20B) | 109.5      | C(27) – C(20) – H(20C)  | 109.5      |
| H(20A) – C(20) – H(20C) | 109.5      | H(20B) – C(20) – H(20C) | 109.5      |
| C(82) – C(17) – C(19)   | 130.5(6)   | C(82) – C(17) – C(10)   | 53.6(7)    |
| C(19) – C(17) – C(10)   | 109.4(3)   | C(82) – C(17) – C(14)   | 116.9(6)   |
| C(19) – C(17) – C(14)   | 112.7(2)   | C(10) – C(17) – C(14)   | 109.4(2)   |
| C(82) – C(17) – C(18)   | 55.1(7)    | C(19) – C(17) – C(18)   | 108.3(3)   |
| C(10) – C(17) – C(18)   | 108.1(3)   | C(14) – C(17) – C(18)   | 108.9(2)   |
| C(82) – C(17) – C(83)   | 114.7(9)   | C(19) – C(17) – C(83)   | 45.2(6)    |
| C(10) – C(17) – C(83)   | 140.9(6)   | C(14) – C(17) – C(83)   | 108.5(6)   |
| C(18) – C(17) – C(83)   | 67.6(7)    | C(82) – C(17) – C(81)   | 106.4(9)   |
| C(19) – C(17) – C(81)   | 57.3(6)    | C(10) – C(17) – C(81)   | 57.6(6)    |
| C(14) – C(17) – C(81)   | 107.0(5)   | C(18) – C(17) – C(81)   | 144.1(6)   |
| C(83) – C(17) – C(81)   | 102.0(8)   | C(26) – C(21) – C(22)   | 116.2(2)   |
| C(26) – C(21) – C       | 124.79(19) | C(22) – C(21) – C       | 119.01(18) |
| C(23) – C(22) – C(21)   | 121.46(19) | C(23) – C(22) – P(2)    | 122.79(16) |
| C(21) – C(22) – P(2)    | 114.91(16) | C(22) – C(23) – C(24)   | 121.6(2)   |
| C(22) – C(23) – H(23)   | 119.2      | C(24) – C(23) – H(23)   | 119.2      |
| C(25) – C(24) – C(23)   | 116.5(2)   | C(25) – C(24) – C(27)   | 120.45(19) |

Continued on next page

**Table S30.** – continued from previous page

| <b>atom – atom – atom</b> | <b>angle</b> | <b>atom – atom – atom</b> | <b>angle</b> |
|---------------------------|--------------|---------------------------|--------------|
| C(23) – C(24) – C(27)     | 123.0(2)     | C(26) – C(25) – C(24)     | 122.3(2)     |
| C(26) – C(25) – H(25)     | 118.9        | C(24) – C(25) – H(25)     | 118.9        |
| C(25) – C(26) – C(21)     | 121.2(2)     | C(25) – C(26) – H(26)     | 119.4        |
| C(21) – C(26) – H(26)     | 119.4        | C(29) – C(27) – C(28)     | 109.54(19)   |
| C(29) – C(27) – C(20)     | 108.6(2)     | C(28) – C(27) – C(20)     | 108.2(2)     |
| C(29) – C(27) – C(24)     | 108.92(19)   | C(28) – C(27) – C(24)     | 109.38(19)   |
| C(20) – C(27) – C(24)     | 112.12(19)   | C(27) – C(29) – H(29A)    | 109.5        |
| C(27) – C(29) – H(29B)    | 109.5        | H(29A) – C(29) – H(29B)   | 109.5        |
| C(27) – C(29) – H(29C)    | 109.5        | H(29A) – C(29) – H(29C)   | 109.5        |
| H(29B) – C(29) – H(29C)   | 109.5        | C(27) – C(28) – H(28A)    | 109.5        |
| C(27) – C(28) – H(28B)    | 109.5        | H(28A) – C(28) – H(28B)   | 109.5        |
| C(27) – C(28) – H(28C)    | 109.5        | H(28A) – C(28) – H(28C)   | 109.5        |
| H(28B) – C(28) – H(28C)   | 109.5        | C(17) – C(18) – H(18A)    | 109.5        |
| C(17) – C(18) – H(18B)    | 109.5        | C(17) – C(18) – H(18C)    | 109.5        |
| C(17) – C(19) – H(19A)    | 109.5        | C(17) – C(19) – H(19B)    | 109.5        |
| C(17) – C(19) – H(19C)    | 109.5        | C(17) – C(10) – H(10A)    | 109.5        |
| C(17) – C(10) – H(10B)    | 109.5        | C(17) – C(10) – H(10C)    | 109.5        |
| C(34) – C(31) – C(33)     | 111.6(2)     | C(34) – C(31) – P(1)      | 114.11(17)   |
| C(33) – C(31) – P(1)      | 108.58(16)   | C(34) – C(31) – H(31)     | 107.4        |
| C(33) – C(31) – H(31)     | 107.4        | P(1) – C(31) – H(31)      | 107.4        |
| C(31) – C(34) – H(34A)    | 109.5        | C(31) – C(34) – H(34B)    | 109.5        |
| H(34A) – C(34) – H(34B)   | 109.5        | C(31) – C(34) – H(34C)    | 109.5        |
| H(34A) – C(34) – H(34C)   | 109.5        | H(34B) – C(34) – H(34C)   | 109.5        |
| C(31) – C(33) – H(33A)    | 109.5        | C(31) – C(33) – H(33B)    | 109.5        |
| H(33A) – C(33) – H(33B)   | 109.5        | C(31) – C(33) – H(33C)    | 109.5        |
| H(33A) – C(33) – H(33C)   | 109.5        | H(33B) – C(33) – H(33C)   | 109.5        |
| C(35) – C(32) – C(36)     | 111.4(2)     | C(35) – C(32) – P(1)      | 109.31(16)   |
| C(36) – C(32) – P(1)      | 115.67(17)   | C(35) – C(32) – H(32)     | 106.7        |
| C(36) – C(32) – H(32)     | 106.7        | P(1) – C(32) – H(32)      | 106.7        |
| C(32) – C(36) – H(36A)    | 109.5        | C(32) – C(36) – H(36B)    | 109.5        |
| H(36A) – C(36) – H(36B)   | 109.5        | C(32) – C(36) – H(36C)    | 109.5        |
| H(36A) – C(36) – H(36C)   | 109.5        | H(36B) – C(36) – H(36C)   | 109.5        |
| C(32) – C(35) – H(35A)    | 109.5        | C(32) – C(35) – H(35B)    | 109.5        |
| H(35A) – C(35) – H(35B)   | 109.5        | C(32) – C(35) – H(35C)    | 109.5        |
| H(35A) – C(35) – H(35C)   | 109.5        | H(35B) – C(35) – H(35C)   | 109.5        |
| C(42) – C(46) – H(46A)    | 109.5        | C(42) – C(46) – H(46B)    | 109.5        |
| H(46A) – C(46) – H(46B)   | 109.5        | C(42) – C(46) – H(46C)    | 109.5        |
| H(46A) – C(46) – H(46C)   | 109.5        | H(46B) – C(46) – H(46C)   | 109.5        |
| C(42) – C(45) – H(45A)    | 109.5        | C(42) – C(45) – H(45B)    | 109.5        |
| H(45A) – C(45) – H(45B)   | 109.5        | C(42) – C(45) – H(45C)    | 109.5        |
| H(45A) – C(45) – H(45C)   | 109.5        | H(45B) – C(45) – H(45C)   | 109.5        |
| C(41) – C(44) – H(44A)    | 109.5        | C(41) – C(44) – H(44B)    | 109.5        |
| H(44A) – C(44) – H(44B)   | 109.5        | C(41) – C(44) – H(44C)    | 109.5        |
| H(44A) – C(44) – H(44C)   | 109.5        | H(44B) – C(44) – H(44C)   | 109.5        |
| C(41) – C(43) – H(43A)    | 109.5        | C(41) – C(43) – H(43B)    | 109.5        |
| H(43A) – C(43) – H(43B)   | 109.5        | C(41) – C(43) – H(43C)    | 109.5        |
| H(43A) – C(43) – H(43C)   | 109.5        | H(43B) – C(43) – H(43C)   | 109.5        |
| C(46) – C(42) – C(45)     | 111.0(2)     | C(46) – C(42) – P(2)      | 114.79(17)   |
| C(45) – C(42) – P(2)      | 110.24(18)   | C(46) – C(42) – H(42)     | 106.8        |
| C(45) – C(42) – H(42)     | 106.8        | P(2) – C(42) – H(42)      | 106.8        |
| C(43) – C(41) – C(44)     | 110.9(2)     | C(43) – C(41) – P(2)      | 110.48(16)   |

Continued on next page

**Table S30.** – continued from previous page

| <b>atom – atom – atom</b> | <b>angle</b> | <b>atom – atom – atom</b> | <b>angle</b> |
|---------------------------|--------------|---------------------------|--------------|
| C(44) – C(41) – P(2)      | 113.15(18)   | C(43) – C(41) – H(41)     | 107.3        |
| C(44) – C(41) – H(41)     | 107.3        | P(2) – C(41) – H(41)      | 107.3        |
| C(52) – C(51) – C(56)     | 117.9(2)     | C(52) – C(51) – S(1)      | 122.58(18)   |
| C(56) – C(51) – S(1)      | 119.49(18)   | C(53) – C(52) – C(51)     | 120.9(2)     |
| C(53) – C(52) – H(52)     | 119.6        | C(51) – C(52) – H(52)     | 119.6        |
| C(54) – C(53) – C(52)     | 120.4(2)     | C(54) – C(53) – H(53)     | 119.8        |
| C(52) – C(53) – H(53)     | 119.8        | C(55) – C(54) – C(53)     | 119.4(2)     |
| C(55) – C(54) – H(54)     | 120.3        | C(53) – C(54) – H(54)     | 120.3        |
| C(54) – C(55) – C(56)     | 120.5(2)     | C(54) – C(55) – H(55)     | 119.7        |
| C(56) – C(55) – H(55)     | 119.7        | C(66) – C(61) – C(62)     | 119.2(2)     |
| C(66) – C(61) – S(2)      | 119.00(19)   | C(62) – C(61) – S(2)      | 121.81(19)   |
| C(63) – C(62) – C(61)     | 120.0(2)     | C(63) – C(62) – H(62)     | 120.0        |
| C(61) – C(62) – H(62)     | 120.0        | C(64) – C(63) – C(62)     | 120.5(3)     |
| C(64) – C(63) – H(63)     | 119.8        | C(62) – C(63) – H(63)     | 119.8        |
| C(65) – C(64) – C(63)     | 119.9(3)     | C(65) – C(64) – H(64)     | 120.1        |
| C(63) – C(64) – H(64)     | 120.1        | C(64) – C(65) – C(66)     | 120.1(3)     |
| C(64) – C(65) – H(65)     | 120.0        | C(66) – C(65) – H(65)     | 120.0        |
| C(61) – C(66) – C(65)     | 120.3(3)     | C(61) – C(66) – H(66)     | 119.8        |
| C(65) – C(66) – H(66)     | 119.8        | C(72) – C(71) – H(71A)    | 109.5        |
| C(72) – C(71) – H(71B)    | 109.5        | H(71A) – C(71) – H(71B)   | 109.5        |
| C(72) – C(71) – H(71C)    | 109.5        | H(71A) – C(71) – H(71C)   | 109.5        |
| H(71B) – C(71) – H(71C)   | 109.5        | C(71) – C(72) – C(73)     | 115.7(4)     |
| C(71) – C(72) – H(72A)    | 108.3        | C(73) – C(72) – H(72A)    | 108.3        |
| C(71) – C(72) – H(72B)    | 108.3        | C(73) – C(72) – H(72B)    | 108.3        |
| H(72A) – C(72) – H(72B)   | 107.4        | C(74) – C(73) – C(72)     | 116.0(4)     |
| C(74) – C(73) – H(73A)    | 108.3        | C(72) – C(73) – H(73A)    | 108.3        |
| C(74) – C(73) – H(73B)    | 108.3        | C(72) – C(73) – H(73B)    | 108.3        |
| H(73A) – C(73) – H(73B)   | 107.4        | C(73) – C(74) – C(75)     | 116.0(4)     |
| C(73) – C(74) – H(74A)    | 108.3        | C(75) – C(74) – H(74A)    | 108.3        |
| C(73) – C(74) – H(74B)    | 108.3        | C(75) – C(74) – H(74B)    | 108.3        |
| H(74A) – C(74) – H(74B)   | 107.4        | C(74) – C(75) – H(75A)    | 109.5        |
| C(74) – C(75) – H(75B)    | 109.5        | H(75A) – C(75) – H(75B)   | 109.5        |
| C(74) – C(75) – H(75C)    | 109.5        | H(75A) – C(75) – H(75C)   | 109.5        |
| H(75B) – C(75) – H(75C)   | 109.5        | C(55) – C(56) – C(51)     | 120.9(2)     |
| C(55) – C(56) – H(56)     | 119.6        | C(51) – C(56) – H(56)     | 119.6        |





**Table S31.** Crystal data and structure refinement for  $[\{\text{PC}(\text{sp}^3)(\text{NH}^t\text{Tol})\text{P}\}^t\text{BuPdI}]$  (**10**).

|                                          |                                                              |                            |
|------------------------------------------|--------------------------------------------------------------|----------------------------|
| Identification code:                     | pc32                                                         |                            |
| Empirical formula:                       | $\text{C}_{40}\text{H}_{60}\text{INP}_2\text{Pd}$            |                            |
| Formula weight:                          | 850.13                                                       |                            |
| Temperature:                             | 120(2) K                                                     |                            |
| Wavelength:                              | 0.71073 Å                                                    |                            |
| Crystal system:                          | Monoclinic                                                   |                            |
| Space group:                             | $P2_1/n$                                                     |                            |
| Unit cell dimensions:                    | $a = 17.0891(17)$ Å                                          | $\alpha = 90^\circ$        |
|                                          | $b = 14.0140(14)$ Å                                          | $\beta = 100.081(3)^\circ$ |
|                                          | $c = 18.4206(18)$ Å                                          | $\gamma = 90^\circ$        |
| Volume:                                  | $4343.4(7)$ Å <sup>3</sup>                                   |                            |
| Z:                                       | 4                                                            |                            |
| Density (calculated):                    | $1.300$ g·cm <sup>-3</sup>                                   |                            |
| Absorption coefficient ( $\mu$ ):        | $1.237$ mm <sup>-1</sup>                                     |                            |
| F(000):                                  | 1744                                                         |                            |
| Crystal size:                            | $0.18 \times 0.13 \times 0.10$ mm <sup>3</sup>               |                            |
| $\theta$ range for data collection:      | 1.50 to 25.00°                                               |                            |
| Index ranges:                            | $-13 \leq h \leq 20, -16 \leq k \leq 16, -21 \leq l \leq 21$ |                            |
| Reflections collected:                   | 67692                                                        |                            |
| Independent reflections:                 | 7652 [ $R_{\text{int}} = 0.0271$ ]                           |                            |
| Completeness to $\theta = 25.00^\circ$ : | 100.0 %                                                      |                            |
| Absorption correction:                   | Semi-empirical from equivalents                              |                            |
| Max. and min. transmission:              | 0.8863 and 0.8081                                            |                            |
| Refinement method:                       | Full-matrix least-squares on $F^2$                           |                            |
| Data / restraints / parameters:          | 7652 / 0 / 408                                               |                            |
| Goodness-of-fit on $F^2$ :               | 1.035                                                        |                            |
| Final R indices [ $I > 2\sigma(I)$ ]:    | $R_1 = 0.0300, wR_2 = 0.0772$                                |                            |
| R indices (all data):                    | $R_1 = 0.0334, wR_2 = 0.0792$                                |                            |
| Largest diff. peak and hole:             | 1.637 and $-1.126$ e <sup>-</sup> ·Å <sup>-3</sup>           |                            |

**Table S32.** Atomic coordinates and equivalent isotropic displacement parameters ( $\text{\AA}^2$ ) for  $[[\text{PC}(\text{sp}^3)(\text{NH}^p\text{Tol})\text{P}]^t\text{BuPdI}]$  (**10**).  $U(\text{eq})$  is defined as one third of the trace of the orthogonalized  $U_{ij}$  tensor

| atom   | x           | y            | z            | $U(\text{eq})$ |
|--------|-------------|--------------|--------------|----------------|
| C(24)  | 0.35252(19) | 0.1762(3)    | -0.17618(17) | 0.037(1)       |
| I      | 0.13372(1)  | 0.15340(2)   | 0.15375(1)   | 0.041(1)       |
| Pd     | 0.25344(1)  | 0.09070(1)   | 0.08894(1)   | 0.021(1)       |
| C(17)  | 0.3410(3)   | -0.4063(2)   | -0.0267(2)   | 0.058(1)       |
| C(15)  | 0.37431(16) | -0.2011(2)   | -0.02075(15) | 0.026(1)       |
| C(11)  | 0.35321(15) | -0.05118(19) | 0.03694(14)  | 0.021(1)       |
| C(10)  | 0.38007(19) | -0.3605(2)   | 0.04527(17)  | 0.031(1)       |
| P(2)   | 0.20394(4)  | 0.15634(5)   | -0.02170(4)  | 0.022(1)       |
| P(1)   | 0.30442(4)  | -0.03056(5)  | 0.16928(4)   | 0.024(1)       |
| C(12)  | 0.34461(15) | -0.10199(19) | 0.10101(15)  | 0.022(1)       |
| C(13)  | 0.35399(16) | -0.2000(2)   | 0.10369(15)  | 0.025(1)       |
| C(16)  | 0.36714(16) | -0.10298(19) | -0.02377(15) | 0.024(1)       |
| C(14)  | 0.36884(16) | -0.2522(2)   | 0.04297(15)  | 0.025(1)       |
| C      | 0.35438(15) | 0.0568(2)    | 0.04182(14)  | 0.022(1)       |
| C(18)  | 0.4690(2)   | -0.3804(3)   | 0.0558(2)    | 0.048(1)       |
| C(19)  | 0.3446(3)   | -0.4048(2)   | 0.1073(2)    | 0.059(1)       |
| C(20)  | 0.3518(3)   | 0.2073(4)    | -0.2558(2)   | 0.073(1)       |
| C(21)  | 0.35434(16) | 0.10589(19)  | -0.03202(14) | 0.021(1)       |
| C(22)  | 0.28615(16) | 0.14670(19)  | -0.07167(15) | 0.023(1)       |
| C(23)  | 0.28508(18) | 0.1786(2)    | -0.14391(16) | 0.030(1)       |
| N      | 0.42855(14) | 0.07706(18)  | 0.09214(13)  | 0.025(1)       |
| C(25)  | 0.42185(18) | 0.1417(2)    | -0.13336(17) | 0.033(1)       |
| C(26)  | 0.42281(17) | 0.1067(2)    | -0.06350(16) | 0.026(1)       |
| C(29)  | 0.3661(3)   | 0.1082(4)    | -0.3006(2)   | 0.073(1)       |
| C(28)  | 0.4211(3)   | 0.2674(4)    | -0.2637(2)   | 0.073(1)       |
| C(27)  | 0.2772(3)   | 0.2381(4)    | -0.2952(2)   | 0.073(1)       |
| C(31)  | 0.38589(19) | -0.0049(2)   | 0.24748(16)  | 0.034(1)       |
| C(33)  | 0.3677(2)   | 0.0857(2)    | 0.28738(18)  | 0.044(1)       |
| C(32)  | 0.23624(19) | -0.1154(2)   | 0.20272(17)  | 0.033(1)       |
| C(34)  | 0.4095(2)   | -0.0878(3)   | 0.29944(19)  | 0.043(1)       |
| C(36)  | 0.1711(2)   | -0.1443(2)   | 0.1392(2)    | 0.043(1)       |
| C(35)  | 0.2002(2)   | -0.0757(3)   | 0.2667(2)    | 0.045(1)       |
| C(41)  | 0.12300(17) | 0.0888(2)    | -0.07864(17) | 0.032(1)       |
| C(43)  | 0.1454(2)   | -0.0166(2)   | -0.0782(2)   | 0.049(1)       |
| C(42)  | 0.16946(18) | 0.2813(2)    | -0.02540(17) | 0.031(1)       |
| C(45)  | 0.2318(2)   | 0.3460(2)    | 0.0185(2)    | 0.042(1)       |
| C(46)  | 0.1402(2)   | 0.3213(3)    | -0.1024(2)   | 0.049(1)       |
| C(51)  | 0.45669(16) | 0.16396(19)  | 0.12057(14)  | 0.023(1)       |
| C(52)  | 0.52569(17) | 0.1667(2)    | 0.17412(15)  | 0.028(1)       |
| C(53)  | 0.55516(18) | 0.2527(2)    | 0.20313(16)  | 0.033(1)       |
| C(54)  | 0.51887(19) | 0.3388(2)    | 0.18092(16)  | 0.033(1)       |
| C(55)  | 0.45032(18) | 0.3343(2)    | 0.12770(16)  | 0.030(1)       |
| C(56)  | 0.41976(17) | 0.2497(2)    | 0.09825(16)  | 0.027(1)       |
| C(57)  | 0.5512(2)   | 0.4325(3)    | 0.2128(2)    | 0.051(1)       |
| C(44)  | 0.0432(2)   | 0.1027(3)    | -0.0549(2)   | 0.051(1)       |
| H(17A) | 0.3656      | -0.3817      | -0.0672      | 0.088          |
| H(17B) | 0.2841      | -0.3911      | -0.0361      | 0.088          |
| H(17C) | 0.3480      | -0.4756      | -0.0234      | 0.088          |
| H      | 0.4557(19)  | 0.030(2)     | 0.1089(17)   | 0.029(9)       |

Continued on next page

**Table S32.** – continued from previous page

| atom   | x      | y       | x       | U(eq) |
|--------|--------|---------|---------|-------|
| H(15)  | 0.3832 | -0.2347 | -0.0634 | 0.031 |
| H(13)  | 0.3502 | -0.2327 | 0.1481  | 0.030 |
| H(16)  | 0.3718 | -0.0704 | -0.0681 | 0.028 |
| H(18A) | 0.4779 | -0.4494 | 0.0552  | 0.072 |
| H(18B) | 0.4951 | -0.3542 | 0.1033  | 0.072 |
| H(18C) | 0.4912 | -0.3504 | 0.0159  | 0.072 |
| H(19A) | 0.2892 | -0.3846 | 0.1034  | 0.089 |
| H(19B) | 0.3749 | -0.3841 | 0.1549  | 0.089 |
| H(19C) | 0.3469 | -0.4745 | 0.1039  | 0.089 |
| H(23)  | 0.2369 | 0.2024  | -0.1715 | 0.035 |
| H(25)  | 0.4698 | 0.1423  | -0.1529 | 0.040 |
| H(26)  | 0.4711 | 0.0825  | -0.0361 | 0.031 |
| H(29A) | 0.3684 | 0.1235  | -0.3521 | 0.109 |
| H(29B) | 0.3221 | 0.0639  | -0.2987 | 0.109 |
| H(29C) | 0.4162 | 0.0786  | -0.2774 | 0.109 |
| H(28A) | 0.4208 | 0.2802  | -0.3161 | 0.109 |
| H(28B) | 0.4702 | 0.2339  | -0.2427 | 0.109 |
| H(28C) | 0.4182 | 0.3279  | -0.2376 | 0.109 |
| H(27A) | 0.2813 | 0.2491  | -0.3469 | 0.087 |
| H(27B) | 0.2617 | 0.2975  | -0.2735 | 0.087 |
| H(27C) | 0.2371 | 0.1889  | -0.2923 | 0.087 |
| H(31)  | 0.4337 | 0.0100  | 0.2250  | 0.040 |
| H(33A) | 0.3578 | 0.1385  | 0.2520  | 0.066 |
| H(33B) | 0.4131 | 0.1014  | 0.3259  | 0.066 |
| H(33C) | 0.3205 | 0.0754  | 0.3098  | 0.066 |
| H(32)  | 0.2673 | -0.1739 | 0.2205  | 0.039 |
| H(34A) | 0.4206 | -0.1438 | 0.2711  | 0.064 |
| H(34B) | 0.3659 | -0.1023 | 0.3259  | 0.064 |
| H(34C) | 0.4571 | -0.0708 | 0.3349  | 0.064 |
| H(36A) | 0.1398 | -0.0880 | 0.1208  | 0.064 |
| H(36B) | 0.1365 | -0.1918 | 0.1564  | 0.064 |
| H(36C) | 0.1952 | -0.1717 | 0.0994  | 0.064 |
| H(35A) | 0.1687 | -0.0188 | 0.2504  | 0.068 |
| H(35B) | 0.2429 | -0.0588 | 0.3075  | 0.068 |
| H(35C) | 0.1659 | -0.1241 | 0.2833  | 0.068 |
| H(41)  | 0.1181 | 0.1123  | -0.1305 | 0.038 |
| H(43A) | 0.1037 | -0.0522 | -0.1104 | 0.074 |
| H(43B) | 0.1511 | -0.0415 | -0.0278 | 0.074 |
| H(43C) | 0.1959 | -0.0239 | -0.0960 | 0.074 |
| H(42)  | 0.1228 | 0.2828  | 0.0006  | 0.037 |
| H(45A) | 0.2783 | 0.3493  | -0.0060 | 0.063 |
| H(45B) | 0.2478 | 0.3202  | 0.0683  | 0.063 |
| H(45C) | 0.2097 | 0.4101  | 0.0213  | 0.063 |
| H(46A) | 0.1847 | 0.3252  | -0.1294 | 0.073 |
| H(46B) | 0.1179 | 0.3852  | -0.0984 | 0.073 |
| H(46C) | 0.0990 | 0.2793  | -0.1290 | 0.073 |
| H(52)  | 0.5523 | 0.1091  | 0.1905  | 0.034 |
| H(53)  | 0.6019 | 0.2530  | 0.2396  | 0.040 |
| H(55)  | 0.4238 | 0.3919  | 0.1112  | 0.036 |
| H(56)  | 0.3727 | 0.2497  | 0.0621  | 0.032 |
| H(57A) | 0.5453 | 0.4808  | 0.1738  | 0.076 |

Continued on next page

**Table S32.** – continued from previous page

| <b>atom</b> | <b>x</b> | <b>y</b> | <b>z</b> | <b>U(eq)</b> |
|-------------|----------|----------|----------|--------------|
| H(57B)      | 0.6076   | 0.4252   | 0.2341   | 0.076        |
| H(57C)      | 0.5219   | 0.4525   | 0.2514   | 0.076        |
| H(44A)      | 0.0267   | 0.1695   | -0.0625  | 0.077        |
| H(44B)      | 0.0477   | 0.0865   | -0.0026  | 0.077        |
| H(44C)      | 0.0036   | 0.0612   | -0.0843  | 0.077        |

**Table S33.** Anisotropic displacement parameters ( $\text{\AA}^2$ ) for  $[\{\text{PC}(\text{sp}^3)(\text{NH}^p\text{Tol})\text{P}\}^t\text{BuPdI}]$  (**10**). The anisotropic displacement factor exponent takes the form:  $-2\pi^2[h^2a^*2U_{11} + \dots + 2hka^*b^*U_{12}]$ .

| atom  | $U_{11}$   | $U_{22}$   | $U_{33}$   | $U_{23}$    | $U_{13}$    | $U_{12}$    |
|-------|------------|------------|------------|-------------|-------------|-------------|
| C(24) | 0.0310(17) | 0.052(2)   | 0.0281(15) | 0.0065(14)  | 0.0065(13)  | -0.0040(15) |
| I     | 0.0410(1)  | 0.0470(1)  | 0.0415(1)  | 0.0016(1)   | 0.0231(1)   | 0.0196(1)   |
| Pd    | 0.0210(1)  | 0.0230(1)  | 0.0218(1)  | -0.0009(1)  | 0.0080(1)   | 0.0049(1)   |
| C(17) | 0.090(3)   | 0.0246(17) | 0.059(2)   | -0.0061(16) | 0.007(2)    | -0.0089(18) |
| C(15) | 0.0266(15) | 0.0278(15) | 0.0261(14) | -0.0032(11) | 0.0124(12)  | 0.0013(12)  |
| C(11) | 0.0166(13) | 0.0235(13) | 0.0240(13) | 0.0012(11)  | 0.0060(10)  | 0.0024(10)  |
| C(10) | 0.0423(18) | 0.0227(14) | 0.0330(16) | 0.0036(12)  | 0.0210(14)  | 0.0051(13)  |
| P(2)  | 0.0179(3)  | 0.0237(4)  | 0.0246(3)  | -0.0021(3)  | 0.0036(3)   | 0.0028(3)   |
| P(1)  | 0.0282(4)  | 0.0258(4)  | 0.0218(3)  | 0.0008(3)   | 0.0119(3)   | 0.0057(3)   |
| C(12) | 0.0188(13) | 0.0267(14) | 0.0235(13) | -0.0013(11) | 0.0090(11)  | 0.0028(11)  |
| C(13) | 0.0246(14) | 0.0274(14) | 0.0243(14) | 0.0041(11)  | 0.0107(11)  | 0.0032(11)  |
| C(16) | 0.0240(14) | 0.0256(14) | 0.0236(13) | 0.0022(11)  | 0.0094(11)  | 0.0005(11)  |
| C(14) | 0.0236(14) | 0.0261(14) | 0.0294(14) | 0.0007(11)  | 0.0120(12)  | 0.0018(11)  |
| C     | 0.0171(13) | 0.0261(14) | 0.0226(13) | 0.0010(11)  | 0.0062(10)  | 0.0029(11)  |
| C(18) | 0.055(2)   | 0.0312(17) | 0.062(2)   | 0.0074(16)  | 0.0223(19)  | 0.0147(16)  |
| C(19) | 0.099(3)   | 0.0227(17) | 0.072(3)   | 0.0079(16)  | 0.063(3)    | 0.0081(18)  |
| C(20) | 0.0612(13) | 0.116(2)   | 0.0432(11) | 0.0227(12)  | 0.0151(10)  | 0.0021(14)  |
| C(21) | 0.0215(14) | 0.0206(13) | 0.0224(13) | -0.0019(10) | 0.0045(11)  | -0.0008(11) |
| C(22) | 0.0217(14) | 0.0230(14) | 0.0255(14) | -0.0015(11) | 0.0046(11)  | -0.0007(11) |
| C(23) | 0.0252(15) | 0.0376(16) | 0.0247(14) | 0.0043(12)  | 0.0013(12)  | 0.0003(13)  |
| N     | 0.0216(12) | 0.0243(12) | 0.0281(12) | 0.0011(10)  | 0.0027(10)  | 0.0051(10)  |
| C(25) | 0.0251(16) | 0.0446(18) | 0.0327(16) | 0.0041(14)  | 0.0125(13)  | -0.0043(13) |
| C(26) | 0.0213(14) | 0.0278(15) | 0.0300(15) | 0.0033(12)  | 0.0058(11)  | 0.0018(11)  |
| C(29) | 0.0612(13) | 0.116(2)   | 0.0432(11) | 0.0227(12)  | 0.0151(10)  | 0.0021(14)  |
| C(28) | 0.0612(13) | 0.116(2)   | 0.0432(11) | 0.0227(12)  | 0.0151(10)  | 0.0021(14)  |
| C(27) | 0.0612(13) | 0.116(2)   | 0.0432(11) | 0.0227(12)  | 0.0151(10)  | 0.0021(14)  |
| C(31) | 0.0412(18) | 0.0354(17) | 0.0257(15) | -0.0006(12) | 0.0103(13)  | 0.0039(14)  |
| C(33) | 0.062(2)   | 0.0393(19) | 0.0313(17) | -0.0084(14) | 0.0071(16)  | 0.0048(16)  |
| C(32) | 0.0379(17) | 0.0310(15) | 0.0347(16) | 0.0066(13)  | 0.0220(14)  | 0.0047(13)  |
| C(34) | 0.046(2)   | 0.046(2)   | 0.0353(17) | 0.0051(15)  | 0.0059(15)  | 0.0082(16)  |
| C(36) | 0.0311(18) | 0.0423(19) | 0.060(2)   | 0.0041(16)  | 0.0221(16)  | -0.0039(14) |
| C(35) | 0.052(2)   | 0.046(2)   | 0.047(2)   | 0.0086(16)  | 0.0365(17)  | 0.0115(17)  |
| C(41) | 0.0198(14) | 0.0390(17) | 0.0347(16) | -0.0068(13) | 0.0005(12)  | -0.0029(12) |
| C(43) | 0.044(2)   | 0.0361(19) | 0.062(2)   | -0.0191(17) | -0.0047(17) | -0.0057(16) |
| C(42) | 0.0287(15) | 0.0271(15) | 0.0360(16) | -0.0008(12) | 0.0035(13)  | 0.0083(12)  |
| C(45) | 0.0399(19) | 0.0267(16) | 0.057(2)   | -0.0049(15) | 0.0020(16)  | 0.0054(14)  |
| C(46) | 0.061(2)   | 0.0401(19) | 0.044(2)   | 0.0059(16)  | 0.0058(17)  | 0.0219(18)  |
| C(51) | 0.0215(14) | 0.0273(14) | 0.0208(13) | 0.0010(11)  | 0.0094(11)  | 0.0006(11)  |
| C(52) | 0.0266(15) | 0.0352(16) | 0.0226(14) | 0.0031(12)  | 0.0056(12)  | 0.0014(12)  |
| C(53) | 0.0299(16) | 0.0463(18) | 0.0215(14) | 0.0023(13)  | 0.0008(12)  | -0.0033(14) |
| C(54) | 0.0382(17) | 0.0370(17) | 0.0238(14) | -0.0036(12) | 0.0085(13)  | -0.0064(14) |
| C(55) | 0.0343(17) | 0.0276(15) | 0.0298(15) | 0.0016(12)  | 0.0079(13)  | 0.0008(13)  |
| C(56) | 0.0231(14) | 0.0302(15) | 0.0277(14) | 0.0005(12)  | 0.0042(11)  | 0.0015(12)  |
| C(57) | 0.063(2)   | 0.044(2)   | 0.0395(19) | -0.0074(16) | -0.0036(17) | -0.0105(18) |
| C(44) | 0.0247(17) | 0.063(2)   | 0.065(2)   | -0.020(2)   | 0.0092(16)  | -0.0107(16) |

**Table S34.** Distances [Å] for  $[(PC(sp^3)(NH^pTol)P)^{tBu}PdI]$  (**10**).

| atom – atom    | distance  | atom – atom    | distance  |
|----------------|-----------|----------------|-----------|
| C(24) – C(23)  | 1.386(4)  | C(24) – C(25)  | 1.390(5)  |
| C(24) – C(20)  | 1.528(5)  | I – Pd         | 2.6903(3) |
| Pd – C         | 2.116(3)  | Pd – P(2)      | 2.2609(8) |
| Pd – P(1)      | 2.3206(7) | C(17) – C(10)  | 1.519(5)  |
| C(17) – H(17A) | 0.9800    | C(17) – H(17B) | 0.9800    |
| C(17) – H(17C) | 0.9800    | C(15) – C(16)  | 1.381(4)  |
| C(15) – C(14)  | 1.392(4)  | C(15) – H(15)  | 0.9500    |
| C(11) – C(16)  | 1.388(4)  | C(11) – C(12)  | 1.408(4)  |
| C(11) – C      | 1.515(4)  | C(10) – C(19)  | 1.518(4)  |
| C(10) – C(18)  | 1.524(5)  | C(10) – C(14)  | 1.529(4)  |
| P(2) – C(22)   | 1.815(3)  | P(2) – C(41)   | 1.845(3)  |
| P(2) – C(42)   | 1.845(3)  | P(1) – C(12)   | 1.833(3)  |
| P(1) – C(32)   | 1.844(3)  | P(1) – C(31)   | 1.855(3)  |
| C(12) – C(13)  | 1.383(4)  | C(13) – C(14)  | 1.397(4)  |
| C(13) – H(13)  | 0.9500    | C(16) – H(16)  | 0.9500    |
| C – N          | 1.461(3)  | C – C(21)      | 1.524(4)  |
| C(18) – H(18A) | 0.9800    | C(18) – H(18B) | 0.9800    |
| C(18) – H(18C) | 0.9800    | C(19) – H(19A) | 0.9800    |
| C(19) – H(19B) | 0.9800    | C(19) – H(19C) | 0.9800    |
| C(20) – C(27)  | 1.419(6)  | C(20) – C(28)  | 1.482(7)  |
| C(20) – C(29)  | 1.654(8)  | C(21) – C(22)  | 1.386(4)  |
| C(21) – C(26)  | 1.394(4)  | C(22) – C(23)  | 1.401(4)  |
| C(23) – H(23)  | 0.9500    | N – C(51)      | 1.378(4)  |
| N – H          | 0.84(3)   | C(25) – C(26)  | 1.375(4)  |
| C(25) – H(25)  | 0.9500    | C(26) – H(26)  | 0.9500    |
| C(29) – H(29A) | 0.9800    | C(29) – H(29B) | 0.9800    |
| C(29) – H(29C) | 0.9800    | C(28) – H(28A) | 0.9800    |
| C(28) – H(28B) | 0.9800    | C(28) – H(28C) | 0.9800    |
| C(27) – H(27A) | 0.9800    | C(27) – H(27B) | 0.9800    |
| C(27) – H(27C) | 0.9800    | C(31) – C(34)  | 1.515(4)  |
| C(31) – C(33)  | 1.526(4)  | C(31) – H(31)  | 1.0000    |
| C(33) – H(33A) | 0.9800    | C(33) – H(33B) | 0.9800    |
| C(33) – H(33C) | 0.9800    | C(32) – C(36)  | 1.522(5)  |
| C(32) – C(35)  | 1.527(4)  | C(32) – H(32)  | 1.0000    |
| C(34) – H(34A) | 0.9800    | C(34) – H(34B) | 0.9800    |
| C(34) – H(34C) | 0.9800    | C(36) – H(36A) | 0.9800    |
| C(36) – H(36B) | 0.9800    | C(36) – H(36C) | 0.9800    |
| C(35) – H(35A) | 0.9800    | C(35) – H(35B) | 0.9800    |
| C(35) – H(35C) | 0.9800    | C(41) – C(44)  | 1.516(4)  |
| C(41) – C(43)  | 1.526(5)  | C(41) – H(41)  | 1.0000    |
| C(43) – H(43A) | 0.9800    | C(43) – H(43B) | 0.9800    |
| C(43) – H(43C) | 0.9800    | C(42) – C(45)  | 1.519(4)  |
| C(42) – C(46)  | 1.527(4)  | C(42) – H(42)  | 1.0000    |
| C(45) – H(45A) | 0.9800    | C(45) – H(45B) | 0.9800    |
| C(45) – H(45C) | 0.9800    | C(46) – H(46A) | 0.9800    |
| C(46) – H(46B) | 0.9800    | C(46) – H(46C) | 0.9800    |
| C(51) – C(56)  | 1.385(4)  | C(51) – C(52)  | 1.399(4)  |
| C(52) – C(53)  | 1.377(4)  | C(52) – H(52)  | 0.9500    |
| C(53) – C(54)  | 1.385(5)  | C(53) – H(53)  | 0.9500    |
| C(54) – C(55)  | 1.391(4)  | C(54) – C(57)  | 1.504(4)  |

Continued on next page

**Table S34.** – continued from previous page

| <b>atom – atom</b> | <b>distance</b> | <b>atom – atom</b> | <b>distance</b> |
|--------------------|-----------------|--------------------|-----------------|
| C(55) – C(56)      | 1.369(4)        | C(55) – H(55)      | 0.9500          |
| C(56) – H(56)      | 0.9500          | C(57) – H(57A)     | 0.9800          |
| C(57) – H(57B)     | 0.9800          | C(57) – H(57C)     | 0.9800          |
| C(44) – H(44A)     | 0.9800          | C(44) – H(44B)     | 0.9800          |
| C(44) – H(44C)     | 0.9800          |                    |                 |

**Table S35.** Angles [°] for  $[\{\text{PC}(\text{sp}^3)(\text{NH}^i\text{Tol})\text{P}\}^i\text{BuPdI}]$  (**10**).

| atom – atom – atom      | angle       | atom – atom – atom      | angle      |
|-------------------------|-------------|-------------------------|------------|
| C(23) – C(24) – C(25)   | 117.0(3)    | C(23) – C(24) – C(20)   | 122.5(3)   |
| C(25) – C(24) – C(20)   | 120.4(3)    | C – Pd – P(2)           | 85.69(7)   |
| C – Pd – P(1)           | 81.67(7)    | P(2) – Pd – P(1)        | 155.81(3)  |
| C – Pd – I              | 173.25(8)   | P(2) – Pd – I           | 94.22(2)   |
| P(1) – Pd – I           | 100.715(19) | C(10) – C(17) – H(17A)  | 109.5      |
| C(10) – C(17) – H(17B)  | 109.5       | H(17A) – C(17) – H(17B) | 109.5      |
| C(10) – C(17) – H(17C)  | 109.5       | H(17A) – C(17) – H(17C) | 109.5      |
| H(17B) – C(17) – H(17C) | 109.5       | C(16) – C(15) – C(14)   | 121.9(3)   |
| C(16) – C(15) – H(15)   | 119.1       | C(14) – C(15) – H(15)   | 119.1      |
| C(16) – C(11) – C(12)   | 117.9(2)    | C(16) – C(11) – C       | 124.6(2)   |
| C(12) – C(11) – C       | 117.2(2)    | C(19) – C(10) – C(17)   | 108.2(3)   |
| C(19) – C(10) – C(18)   | 110.4(3)    | C(17) – C(10) – C(18)   | 108.1(3)   |
| C(19) – C(10) – C(14)   | 111.3(2)    | C(17) – C(10) – C(14)   | 111.2(3)   |
| C(18) – C(10) – C(14)   | 107.6(3)    | C(22) – P(2) – C(41)    | 104.09(13) |
| C(22) – P(2) – C(42)    | 108.81(13)  | C(41) – P(2) – C(42)    | 105.27(14) |
| C(22) – P(2) – Pd       | 103.08(9)   | C(41) – P(2) – Pd       | 115.39(11) |
| C(42) – P(2) – Pd       | 119.08(10)  | C(12) – P(1) – C(32)    | 102.23(13) |
| C(12) – P(1) – C(31)    | 108.57(13)  | C(32) – P(1) – C(31)    | 107.34(15) |
| C(12) – P(1) – Pd       | 96.10(9)    | C(32) – P(1) – Pd       | 119.76(11) |
| C(31) – P(1) – Pd       | 120.01(10)  | C(13) – C(12) – C(11)   | 120.3(2)   |
| C(13) – C(12) – P(1)    | 125.0(2)    | C(11) – C(12) – P(1)    | 113.9(2)   |
| C(12) – C(13) – C(14)   | 121.9(3)    | C(12) – C(13) – H(13)   | 119.1      |
| C(14) – C(13) – H(13)   | 119.1       | C(15) – C(16) – C(11)   | 121.0(3)   |
| C(15) – C(16) – H(16)   | 119.5       | C(11) – C(16) – H(16)   | 119.5      |
| C(15) – C(14) – C(13)   | 117.0(3)    | C(15) – C(14) – C(10)   | 120.5(2)   |
| C(13) – C(14) – C(10)   | 122.5(2)    | N – C – C(11)           | 103.5(2)   |
| N – C – C(21)           | 110.1(2)    | C(11) – C – C(21)       | 113.6(2)   |
| N – C – Pd              | 112.02(17)  | C(11) – C – Pd          | 104.20(17) |
| C(21) – C – Pd          | 113.05(17)  | C(10) – C(18) – H(18A)  | 109.5      |
| C(10) – C(18) – H(18B)  | 109.5       | H(18A) – C(18) – H(18B) | 109.5      |
| C(10) – C(18) – H(18C)  | 109.5       | H(18A) – C(18) – H(18C) | 109.5      |
| H(18B) – C(18) – H(18C) | 109.5       | C(10) – C(19) – H(19A)  | 109.5      |
| C(10) – C(19) – H(19B)  | 109.5       | H(19A) – C(19) – H(19B) | 109.5      |
| C(10) – C(19) – H(19C)  | 109.5       | H(19A) – C(19) – H(19C) | 109.5      |
| H(19B) – C(19) – H(19C) | 109.5       | C(27) – C(20) – C(28)   | 116.0(4)   |
| C(27) – C(20) – C(24)   | 115.6(4)    | C(28) – C(20) – C(24)   | 112.6(4)   |
| C(27) – C(20) – C(29)   | 101.4(4)    | C(28) – C(20) – C(29)   | 103.8(4)   |
| C(24) – C(20) – C(29)   | 105.2(4)    | C(22) – C(21) – C(26)   | 117.8(2)   |
| C(22) – C(21) – C       | 121.7(2)    | C(26) – C(21) – C       | 120.4(2)   |
| C(21) – C(22) – C(23)   | 120.2(3)    | C(21) – C(22) – P(2)    | 114.7(2)   |
| C(23) – C(22) – P(2)    | 125.2(2)    | C(24) – C(23) – C(22)   | 121.7(3)   |
| C(24) – C(23) – H(23)   | 119.1       | C(22) – C(23) – H(23)   | 119.1      |
| C(51) – N – C           | 128.2(2)    | C(51) – N – H           | 115(2)     |
| C – N – H               | 116(2)      | C(26) – C(25) – C(24)   | 121.7(3)   |
| C(26) – C(25) – H(25)   | 119.2       | C(24) – C(25) – H(25)   | 119.2      |
| C(25) – C(26) – C(21)   | 121.3(3)    | C(25) – C(26) – H(26)   | 119.4      |
| C(21) – C(26) – H(26)   | 119.4       | C(20) – C(29) – H(29A)  | 109.5      |
| C(20) – C(29) – H(29B)  | 109.5       | H(29A) – C(29) – H(29B) | 109.5      |
| C(20) – C(29) – H(29C)  | 109.5       | H(29A) – C(29) – H(29C) | 109.5      |
| H(29B) – C(29) – H(29C) | 109.5       | C(20) – C(28) – H(28A)  | 109.5      |

Continued on next page



**Table S35.** – continued from previous page

| <b>atom – atom – atom</b> | <b>angle</b> | <b>atom – atom – atom</b> | <b>angle</b> |
|---------------------------|--------------|---------------------------|--------------|
| C(20) – C(28) – H(28B)    | 109.5        | H(28A) – C(28) – H(28B)   | 109.5        |
| C(20) – C(28) – H(28C)    | 109.5        | H(28A) – C(28) – H(28C)   | 109.5        |
| H(28B) – C(28) – H(28C)   | 109.5        | C(20) – C(27) – H(27A)    | 109.5        |
| C(20) – C(27) – H(27B)    | 109.5        | H(27A) – C(27) – H(27B)   | 109.5        |
| C(20) – C(27) – H(27C)    | 109.5        | H(27A) – C(27) – H(27C)   | 109.5        |
| H(27B) – C(27) – H(27C)   | 109.5        | C(34) – C(31) – C(33)     | 112.8(3)     |
| C(34) – C(31) – P(1)      | 115.0(2)     | C(33) – C(31) – P(1)      | 110.3(2)     |
| C(34) – C(31) – H(31)     | 106.0        | C(33) – C(31) – H(31)     | 106.0        |
| P(1) – C(31) – H(31)      | 106.0        | C(31) – C(33) – H(33A)    | 109.5        |
| C(31) – C(33) – H(33B)    | 109.5        | H(33A) – C(33) – H(33B)   | 109.5        |
| C(31) – C(33) – H(33C)    | 109.5        | H(33A) – C(33) – H(33C)   | 109.5        |
| H(33B) – C(33) – H(33C)   | 109.5        | C(36) – C(32) – C(35)     | 110.6(3)     |
| C(36) – C(32) – P(1)      | 109.5(2)     | C(35) – C(32) – P(1)      | 112.8(2)     |
| C(36) – C(32) – H(32)     | 107.9        | C(35) – C(32) – H(32)     | 107.9        |
| P(1) – C(32) – H(32)      | 107.9        | C(31) – C(34) – H(34A)    | 109.5        |
| C(31) – C(34) – H(34B)    | 109.5        | H(34A) – C(34) – H(34B)   | 109.5        |
| C(31) – C(34) – H(34C)    | 109.5        | H(34A) – C(34) – H(34C)   | 109.5        |
| H(34B) – C(34) – H(34C)   | 109.5        | C(32) – C(36) – H(36A)    | 109.5        |
| C(32) – C(36) – H(36B)    | 109.5        | H(36A) – C(36) – H(36B)   | 109.5        |
| C(32) – C(36) – H(36C)    | 109.5        | H(36A) – C(36) – H(36C)   | 109.5        |
| H(36B) – C(36) – H(36C)   | 109.5        | C(32) – C(35) – H(35A)    | 109.5        |
| C(32) – C(35) – H(35B)    | 109.5        | H(35A) – C(35) – H(35B)   | 109.5        |
| C(32) – C(35) – H(35C)    | 109.5        | H(35A) – C(35) – H(35C)   | 109.5        |
| H(35B) – C(35) – H(35C)   | 109.5        | C(44) – C(41) – C(43)     | 111.2(3)     |
| C(44) – C(41) – P(2)      | 113.1(2)     | C(43) – C(41) – P(2)      | 109.3(2)     |
| C(44) – C(41) – H(41)     | 107.7        | C(43) – C(41) – H(41)     | 107.7        |
| P(2) – C(41) – H(41)      | 107.7        | C(41) – C(43) – H(43A)    | 109.5        |
| C(41) – C(43) – H(43B)    | 109.5        | H(43A) – C(43) – H(43B)   | 109.5        |
| C(41) – C(43) – H(43C)    | 109.5        | H(43A) – C(43) – H(43C)   | 109.5        |
| H(43B) – C(43) – H(43C)   | 109.5        | C(45) – C(42) – C(46)     | 111.1(3)     |
| C(45) – C(42) – P(2)      | 110.9(2)     | C(46) – C(42) – P(2)      | 115.7(2)     |
| C(45) – C(42) – H(42)     | 106.1        | C(46) – C(42) – H(42)     | 106.1        |
| P(2) – C(42) – H(42)      | 106.1        | C(42) – C(45) – H(45A)    | 109.5        |
| C(42) – C(45) – H(45B)    | 109.5        | H(45A) – C(45) – H(45B)   | 109.5        |
| C(42) – C(45) – H(45C)    | 109.5        | H(45A) – C(45) – H(45C)   | 109.5        |
| H(45B) – C(45) – H(45C)   | 109.5        | C(42) – C(46) – H(46A)    | 109.5        |
| C(42) – C(46) – H(46B)    | 109.5        | H(46A) – C(46) – H(46B)   | 109.5        |
| C(42) – C(46) – H(46C)    | 109.5        | H(46A) – C(46) – H(46C)   | 109.5        |
| H(46B) – C(46) – H(46C)   | 109.5        | N – C(51) – C(56)         | 122.9(2)     |
| N – C(51) – C(52)         | 119.2(3)     | C(56) – C(51) – C(52)     | 118.0(3)     |
| C(53) – C(52) – C(51)     | 120.2(3)     | C(53) – C(52) – H(52)     | 119.9        |
| C(51) – C(52) – H(52)     | 119.9        | C(52) – C(53) – C(54)     | 122.2(3)     |
| C(52) – C(53) – H(53)     | 118.9        | C(54) – C(53) – H(53)     | 118.9        |
| C(53) – C(54) – C(55)     | 116.5(3)     | C(53) – C(54) – C(57)     | 122.0(3)     |
| C(55) – C(54) – C(57)     | 121.5(3)     | C(56) – C(55) – C(54)     | 122.3(3)     |
| C(56) – C(55) – H(55)     | 118.9        | C(54) – C(55) – H(55)     | 118.9        |
| C(55) – C(56) – C(51)     | 120.7(3)     | C(55) – C(56) – H(56)     | 119.6        |
| C(51) – C(56) – H(56)     | 119.6        | C(54) – C(57) – H(57A)    | 109.5        |
| C(54) – C(57) – H(57B)    | 109.5        | H(57A) – C(57) – H(57B)   | 109.5        |
| C(54) – C(57) – H(57C)    | 109.5        | H(57A) – C(57) – H(57C)   | 109.5        |
| H(57B) – C(57) – H(57C)   | 109.5        | C(41) – C(44) – H(44A)    | 109.5        |

Continued on next page

**Table S35.** – continued from previous page

| <b>atom – atom – atom</b> | <b>angle</b> | <b>atom – atom – atom</b> | <b>angle</b> |
|---------------------------|--------------|---------------------------|--------------|
| C(41) – C(44) – H(44B)    | 109.5        | H(44A) – C(44) – H(44B)   | 109.5        |
| C(41) – C(44) – H(44C)    | 109.5        | H(44A) – C(44) – H(44C)   | 109.5        |
| H(44B) – C(44) – H(44C)   | 109.5        |                           |              |

## 5.7 Crystal data for $[\{\text{PC}(\text{sp}^3)(\text{OPhP})\}^t\text{BuPdI}]$ (**11**)

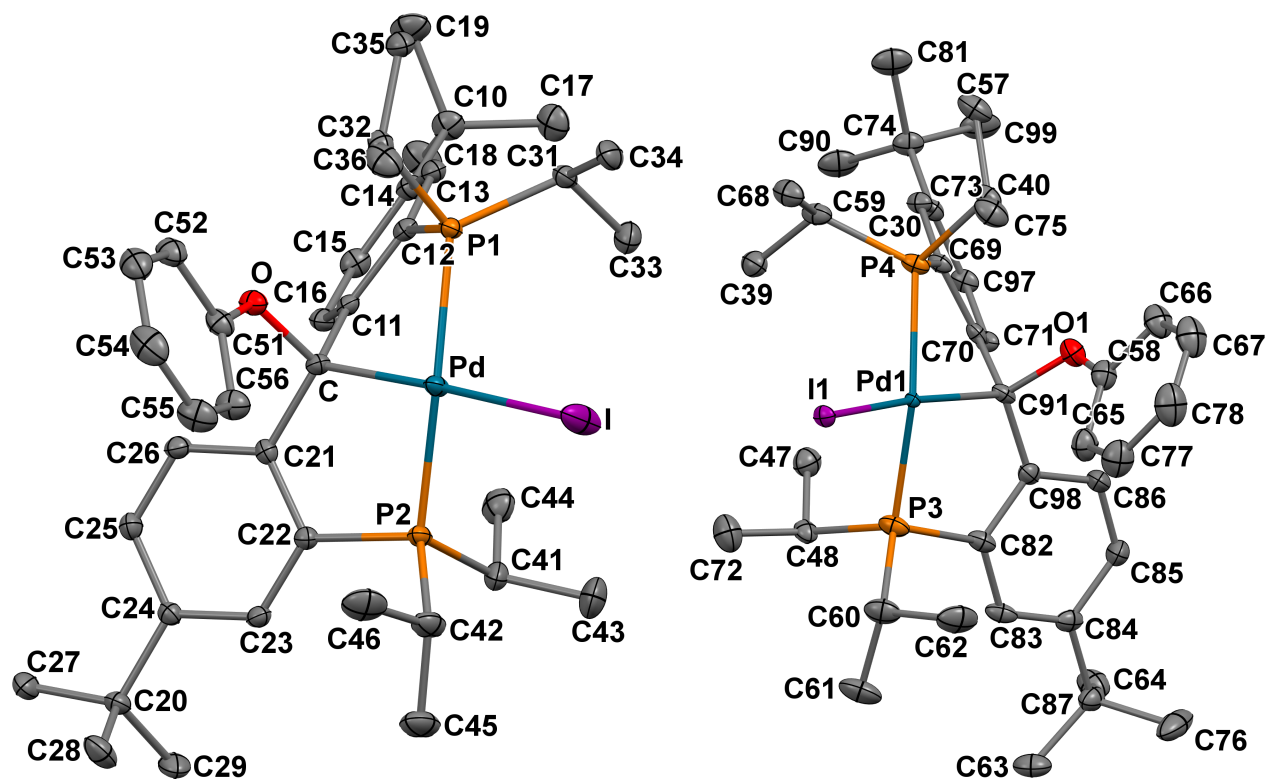

**Figure S50.** Thermal-ellipsoid representation of the two crystallographically independent molecules of  $[\{\text{PC}(\text{sp}^3)(\text{OPhP})\}^t\text{BuPdI}]$  (**11**) at 50% probability. Hydrogen atoms and the solvent were omitted for clarity.

**Table S36.** Crystal data and structure refinement for  $[(\text{PC}(\text{sp}^3)(\text{OPhP}))^t\text{BuPdI}]$  (**11**).

|                                          |                                                                    |                               |
|------------------------------------------|--------------------------------------------------------------------|-------------------------------|
| Identification code:                     | pc35b                                                              |                               |
| Empirical formula:                       | $\text{C}_{39}\text{H}_{57}\text{IOP}_2\text{Pd}$                  |                               |
| Formula weight:                          | 837.09                                                             |                               |
| Temperature:                             | 120(2) K                                                           |                               |
| Wavelength:                              | 0.71073 Å                                                          |                               |
| Crystal system:                          | Triclinic                                                          |                               |
| Space group:                             | $P\bar{1}$                                                         |                               |
| Unit cell dimensions:                    | $a = 11.8764(6)$ Å                                                 | $\alpha = 101.2966(16)^\circ$ |
|                                          | $b = 14.4330(8)$ Å                                                 | $\beta = 93.5784(16)^\circ$   |
|                                          | $c = 25.1741(14)$ Å                                                | $\gamma = 111.2000(15)^\circ$ |
| Volume:                                  | $3903.0(4)$ Å <sup>3</sup>                                         |                               |
| Z:                                       | 4                                                                  |                               |
| Density (calculated):                    | $1.425$ g·cm <sup>-3</sup>                                         |                               |
| Absorption coefficient ( $\mu$ ):        | $1.376$ mm <sup>-1</sup>                                           |                               |
| F(000):                                  | 1712                                                               |                               |
| Crystal size:                            | $0.09 \times 0.08 \times 0.05$ mm <sup>3</sup>                     |                               |
| $\theta$ range for data collection:      | $1.67$ to $25.00^\circ$                                            |                               |
| Index ranges:                            | $-14 \leq h \leq 14$ , $-17 \leq k \leq 17$ , $-29 \leq l \leq 29$ |                               |
| Reflections collected:                   | 95643                                                              |                               |
| Independent reflections:                 | 13721 [ $R_{\text{int}} = 0.0511$ ]                                |                               |
| Completeness to $\theta = 25.00^\circ$ : | 100.0 %                                                            |                               |
| Absorption correction:                   | Semi-empirical from equivalents                                    |                               |
| Max. and min. transmission:              | 0.9344 and 0.8862                                                  |                               |
| Refinement method:                       | Full-matrix least-squares on $F^2$                                 |                               |
| Data / restraints / parameters:          | 13721 / 0 / 841                                                    |                               |
| Goodness-of-fit on $F^2$ :               | 1.031                                                              |                               |
| Final R indices [ $I > 2\sigma(I)$ ]:    | $R_1 = 0.0389$ , $wR_2 = 0.0886$                                   |                               |
| R indices (all data):                    | $R_1 = 0.0556$ , $wR_2 = 0.0934$                                   |                               |
| Largest diff. peak and hole:             | $3.446$ and $-2.064$ e <sup>-</sup> ·Å <sup>-3</sup>               |                               |

**Table S37.** Atomic coordinates and equivalent isotropic displacement parameters ( $\text{\AA}^2$ ) for  $[\{\text{PC}(\text{sp}^3)(\text{OPhP})\}^{\text{tBu}}\text{PdI}]$  (**11**).  $U(\text{eq})$  is defined as one third of the trace of the orthogonalized  $U_{ij}$  tensor

| atom  | x           | y           | z           | $U(\text{eq})$ |
|-------|-------------|-------------|-------------|----------------|
| Pd(1) | 0.8684(3)   | 0.1959(2)   | 0.14206(12) | 0.010(1)       |
| I(1)  | 1.02028(17) | 0.32115(14) | 0.23212(8)  | 0.019(1)       |
| P(1)  | 0.42571(9)  | 0.59684(8)  | 0.33646(4)  | 0.018(1)       |
| O(1)  | 0.6304(3)   | 0.1504(2)   | 0.07849(13) | 0.030(1)       |
| C(62) | 1.0721(5)   | 0.4355(4)   | 0.0911(2)   | 0.047(1)       |
| C(65) | 0.7484(5)   | 0.3354(4)   | 0.1010(2)   | 0.036(1)       |
| C(60) | 1.1278(5)   | 0.3545(4)   | 0.0912(2)   | 0.038(1)       |
| C(59) | 0.7727(4)   | 0.0268(3)   | 0.22811(17) | 0.027(1)       |
| C(58) | 0.6428(4)   | 0.2503(4)   | 0.09767(19) | 0.031(1)       |
| C(57) | 0.5002(4)   | 0.0237(4)   | 0.2253(2)   | 0.037(1)       |
| C(56) | 0.6881(4)   | 0.8358(3)   | 0.4752(2)   | 0.031(1)       |
| C(55) | 0.7103(5)   | 0.9380(4)   | 0.4983(2)   | 0.039(1)       |
| C(54) | 0.6248(5)   | 0.9649(4)   | 0.5248(2)   | 0.043(1)       |
| C(53) | 0.5161(5)   | 0.8892(4)   | 0.5286(2)   | 0.035(1)       |
| C(61) | 1.2237(5)   | 0.3638(4)   | 0.0523(2)   | 0.049(2)       |
| I     | 0.67166(3)  | 0.77566(3)  | 0.26906(2)  | 0.051(1)       |
| O     | 0.5443(2)   | 0.6575(2)   | 0.45674(12) | 0.023(1)       |
| Pd    | 0.63714(3)  | 0.68113(2)  | 0.35155(1)  | 0.019(1)       |
| P(2)  | 0.83558(9)  | 0.69929(8)  | 0.36686(4)  | 0.020(1)       |
| P(4)  | 0.71833(10) | 0.08513(8)  | 0.17798(4)  | 0.021(1)       |
| C(10) | 0.2721(4)   | 0.1929(3)   | 0.32749(19) | 0.028(1)       |
| C(11) | 0.5314(3)   | 0.5068(3)   | 0.39824(16) | 0.017(1)       |
| C     | 0.6169(3)   | 0.6177(3)   | 0.41989(16) | 0.018(1)       |
| C(12) | 0.4264(4)   | 0.4864(3)   | 0.36140(16) | 0.017(1)       |
| C(13) | 0.3428(4)   | 0.3865(3)   | 0.34114(17) | 0.021(1)       |
| C(16) | 0.5489(4)   | 0.4241(3)   | 0.41210(17) | 0.023(1)       |
| C(15) | 0.4670(4)   | 0.3244(3)   | 0.38942(18) | 0.024(1)       |
| C(14) | 0.3624(4)   | 0.3027(3)   | 0.35429(17) | 0.022(1)       |
| C(20) | 1.0815(4)   | 0.6877(3)   | 0.55111(17) | 0.024(1)       |
| C(19) | 0.1482(4)   | 0.1778(4)   | 0.3464(2)   | 0.040(1)       |
| C(18) | 0.3151(5)   | 0.1130(3)   | 0.3428(2)   | 0.040(1)       |
| C(17) | 0.2578(5)   | 0.1779(4)   | 0.26515(19) | 0.036(1)       |
| C(21) | 0.7366(4)   | 0.6336(3)   | 0.45367(16) | 0.018(1)       |
| C(22) | 0.8474(4)   | 0.6695(3)   | 0.43364(16) | 0.018(1)       |
| C(23) | 0.9552(4)   | 0.6823(3)   | 0.46460(16) | 0.019(1)       |
| C(24) | 0.9586(4)   | 0.6641(3)   | 0.51679(16) | 0.019(1)       |
| C(25) | 0.8467(4)   | 0.6293(3)   | 0.53626(17) | 0.022(1)       |
| C(26) | 0.7384(4)   | 0.6138(3)   | 0.50555(17) | 0.022(1)       |
| C(27) | 1.0660(4)   | 0.6515(4)   | 0.60411(18) | 0.031(1)       |
| C(28) | 1.1524(4)   | 0.8036(4)   | 0.5650(2)   | 0.038(1)       |
| C(29) | 1.1551(4)   | 0.6348(4)   | 0.5188(2)   | 0.036(1)       |
| C(30) | 0.6010(4)   | -0.1223(3)  | 0.11641(17) | 0.022(1)       |
| C(31) | 0.3448(4)   | 0.5423(3)   | 0.26611(17) | 0.022(1)       |
| C(32) | 0.3241(4)   | 0.6457(3)   | 0.37583(17) | 0.022(1)       |
| C(33) | 0.4162(4)   | 0.4923(4)   | 0.23023(18) | 0.033(1)       |
| C(81) | 0.4538(17)  | -0.3291(12) | 0.1233(7)   | 0.043(1)       |
| C(90) | 0.5903(15)  | -0.3677(11) | 0.0610(7)   | 0.043(1)       |
| C(99) | 0.3953(15)  | -0.3649(10) | 0.0229(6)   | 0.043(1)       |
| C(35) | 0.1891(4)   | 0.5767(4)   | 0.35983(18) | 0.028(1)       |

Continued on next page

**Table S37.** – continued from previous page

| atom   | x           | y          | x            | U(eq)    |
|--------|-------------|------------|--------------|----------|
| C(34)  | 0.3163(4)   | 0.6202(4)  | 0.24028(19)  | 0.032(1) |
| C(39)  | 0.8789(4)   | -0.0008(4) | 0.20992(19)  | 0.032(1) |
| C(36)  | 0.3518(5)   | 0.7580(4)  | 0.3764(2)    | 0.039(1) |
| C(40)  | 0.5847(4)   | 0.1090(3)  | 0.20154(18)  | 0.025(1) |
| C(41)  | 0.8760(4)   | 0.6027(4)  | 0.32121(18)  | 0.032(1) |
| C(42)  | 0.9564(4)   | 0.8240(4)  | 0.3667(2)    | 0.033(1) |
| C(43)  | 0.8964(5)   | 0.6242(5)  | 0.2651(2)    | 0.051(2) |
| C(44)  | 0.7794(5)   | 0.4961(4)  | 0.3159(2)    | 0.038(1) |
| C(45)  | 1.0876(4)   | 0.8317(4)  | 0.3753(2)    | 0.044(1) |
| C(46)  | 0.9405(5)   | 0.9114(4)  | 0.4055(2)    | 0.046(1) |
| C(47)  | 0.9942(5)   | 0.0295(4)  | 0.0676(2)    | 0.036(1) |
| C(48)  | 1.0860(4)   | 0.1381(3)  | 0.07468(18)  | 0.025(1) |
| C(51)  | 0.5785(4)   | 0.7606(3)  | 0.47889(18)  | 0.025(1) |
| C(52)  | 0.4922(4)   | 0.7873(4)  | 0.50570(18)  | 0.030(1) |
| C(63)  | 1.0546(5)   | 0.2494(4)  | -0.1315(2)   | 0.042(1) |
| C(64)  | 0.8720(5)   | 0.0997(4)  | -0.1777(2)   | 0.042(1) |
| C(66)  | 0.5384(5)   | 0.2619(4)  | 0.1146(2)    | 0.040(1) |
| C(67)  | 0.5418(5)   | 0.3593(4)  | 0.1363(2)    | 0.049(1) |
| C(72)  | 1.1857(5)   | 0.1661(4)  | 0.1227(2)    | 0.047(1) |
| C(71)  | 0.6569(4)   | -0.0662(3) | 0.01992(16)  | 0.020(1) |
| C(70)  | 0.6847(3)   | 0.0103(3)  | 0.06733(16)  | 0.018(1) |
| C(69)  | 0.6585(4)   | -0.0197(3) | 0.11627(16)  | 0.019(1) |
| C(68)  | 0.8066(4)   | 0.0920(4)  | 0.28660(18)  | 0.035(1) |
| C(75)  | 0.6250(5)   | 0.2148(4)  | 0.2408(2)    | 0.040(1) |
| C(74)  | 0.5087(4)   | -0.3125(3) | 0.06905(19)  | 0.028(1) |
| C(73)  | 0.5704(4)   | -0.1991(3) | 0.06871(17)  | 0.022(1) |
| C(76)  | 0.8628(6)   | 0.2719(5)  | -0.1586(3)   | 0.063(2) |
| C(77)  | 0.7503(5)   | 0.4319(4)  | 0.1236(2)    | 0.046(1) |
| C(78)  | 0.6475(6)   | 0.4445(5)  | 0.1416(2)    | 0.052(2) |
| C(97)  | 0.6018(4)   | -0.1684(3) | 0.02116(17)  | 0.023(1) |
| C(91)  | 0.7375(3)   | 0.1245(3)  | 0.06987(17)  | 0.019(1) |
| C(98)  | 0.7832(4)   | 0.1508(3)  | 0.01749(18)  | 0.022(1) |
| C(82)  | 0.9084(4)   | 0.1959(3)  | 0.01577(18)  | 0.024(1) |
| C(83)  | 0.9504(4)   | 0.2108(3)  | -0.03393(18) | 0.026(1) |
| C(84)  | 0.8715(4)   | 0.1862(3)  | -0.08212(19) | 0.025(1) |
| C(85)  | 0.7467(4)   | 0.1464(4)  | -0.0781(2)   | 0.032(1) |
| C(86)  | 0.7029(4)   | 0.1281(4)  | -0.03007(19) | 0.031(1) |
| C(87)  | 0.9163(4)   | 0.2028(4)  | -0.13642(19) | 0.031(1) |
| C(92)  | 0.4174(10)  | -0.3263(7) | 0.1068(4)    | 0.043(1) |
| C(79)  | 0.4549(10)  | -0.3787(6) | 0.0112(4)    | 0.043(1) |
| C(80)  | 0.6097(9)   | -0.3458(7) | 0.0906(5)    | 0.043(1) |
| I(3)   | 1.0096(6)   | 0.3292(4)  | 0.2262(3)    | 0.066(1) |
| Pd(91) | 0.8595(6)   | 0.2025(5)  | 0.1361(3)    | 0.037(1) |
| P(3)   | 1.00566(10) | 0.22812(9) | 0.08173(5)   | 0.027(1) |
| H(62A) | 1.1377      | 0.5034     | 0.0981       | 0.071    |
| H(62B) | 1.0198      | 0.4338     | 0.1198       | 0.071    |
| H(62C) | 1.0234      | 0.4210     | 0.0554       | 0.071    |
| H(65)  | 0.8187      | 0.3278     | 0.0880       | 0.043    |
| H(60)  | 1.1728      | 0.3707     | 0.1289       | 0.046    |
| H(59)  | 0.7041      | -0.0385    | 0.2283       | 0.032    |
| H(57A) | 0.4263      | 0.0364     | 0.2323       | 0.056    |

Continued on next page

**Table S37.** – continued from previous page

| atom   | x      | y       | x       | U(eq) |
|--------|--------|---------|---------|-------|
| H(57B) | 0.5425 | 0.0223  | 0.2596  | 0.056 |
| H(57C) | 0.4779 | -0.0422 | 0.1990  | 0.056 |
| H(56)  | 0.7478 | 0.8180  | 0.4571  | 0.037 |
| H(55)  | 0.7854 | 0.9897  | 0.4958  | 0.046 |
| H(54)  | 0.6404 | 1.0346  | 0.5404  | 0.051 |
| H(53)  | 0.4569 | 0.9071  | 0.5470  | 0.042 |
| H(61A) | 1.2396 | 0.3007  | 0.0447  | 0.073 |
| H(61B) | 1.2994 | 0.4217  | 0.0694  | 0.073 |
| H(61C) | 1.1933 | 0.3748  | 0.0180  | 0.073 |
| H(13)  | 0.2705 | 0.3746  | 0.3178  | 0.026 |
| H(16)  | 0.6179 | 0.4357  | 0.4375  | 0.027 |
| H(15)  | 0.4840 | 0.2694  | 0.3985  | 0.029 |
| H(19A) | 0.1185 | 0.2277  | 0.3358  | 0.060 |
| H(19B) | 0.1568 | 0.1875  | 0.3863  | 0.060 |
| H(19C) | 0.0899 | 0.1084  | 0.3291  | 0.060 |
| H(18A) | 0.2572 | 0.0445  | 0.3238  | 0.060 |
| H(18B) | 0.3201 | 0.1196  | 0.3825  | 0.060 |
| H(18C) | 0.3959 | 0.1234  | 0.3320  | 0.060 |
| H(17A) | 0.2010 | 0.1081  | 0.2479  | 0.054 |
| H(17B) | 0.3374 | 0.1894  | 0.2529  | 0.054 |
| H(17C) | 0.2259 | 0.2267  | 0.2548  | 0.054 |
| H(23)  | 1.0292 | 0.7042  | 0.4496  | 0.023 |
| H(25)  | 0.8453 | 0.6159  | 0.5717  | 0.027 |
| H(26)  | 0.6640 | 0.5893  | 0.5200  | 0.026 |
| H(27A) | 1.0191 | 0.5776  | 0.5956  | 0.046 |
| H(27B) | 1.0224 | 0.6867  | 0.6266  | 0.046 |
| H(27C) | 1.1464 | 0.6671  | 0.6242  | 0.046 |
| H(28A) | 1.1687 | 0.8266  | 0.5311  | 0.057 |
| H(28B) | 1.2300 | 0.8206  | 0.5881  | 0.057 |
| H(28C) | 1.1041 | 0.8377  | 0.5846  | 0.057 |
| H(29A) | 1.1077 | 0.5610  | 0.5080  | 0.054 |
| H(29B) | 1.2317 | 0.6483  | 0.5417  | 0.054 |
| H(29C) | 1.1732 | 0.6613  | 0.4860  | 0.054 |
| H(30)  | 0.5820 | -0.1405 | 0.1500  | 0.027 |
| H(31)  | 0.2651 | 0.4873  | 0.2676  | 0.026 |
| H(32)  | 0.3457 | 0.6444  | 0.4146  | 0.027 |
| H(33A) | 0.3674 | 0.4570  | 0.1941  | 0.049 |
| H(33B) | 0.4341 | 0.4430  | 0.2475  | 0.049 |
| H(33C) | 0.4929 | 0.5450  | 0.2261  | 0.049 |
| H(81A) | 0.3910 | -0.3001 | 0.1272  | 0.065 |
| H(81B) | 0.5188 | -0.2952 | 0.1547  | 0.065 |
| H(81C) | 0.4173 | -0.4025 | 0.1217  | 0.065 |
| H(90A) | 0.6108 | -0.3720 | 0.0237  | 0.065 |
| H(90B) | 0.5497 | -0.4368 | 0.0665  | 0.065 |
| H(90C) | 0.6652 | -0.3314 | 0.0874  | 0.065 |
| H(99A) | 0.4216 | -0.3564 | -0.0126 | 0.065 |
| H(99B) | 0.3358 | -0.3332 | 0.0303  | 0.065 |
| H(99C) | 0.3576 | -0.4379 | 0.0220  | 0.065 |
| H(35A) | 0.1599 | 0.5813  | 0.3236  | 0.042 |
| H(35B) | 0.1422 | 0.5986  | 0.3868  | 0.042 |
| H(35C) | 0.1787 | 0.5058  | 0.3589  | 0.042 |

Continued on next page

**Table S37.** – continued from previous page

| atom   | x      | y       | x       | U(eq) |
|--------|--------|---------|---------|-------|
| H(34A) | 0.3926 | 0.6768  | 0.2396  | 0.047 |
| H(34B) | 0.2639 | 0.6466  | 0.2619  | 0.047 |
| H(34C) | 0.2742 | 0.5872  | 0.2028  | 0.047 |
| H(39A) | 0.8531 | -0.0479 | 0.1737  | 0.048 |
| H(39B) | 0.9047 | -0.0337 | 0.2362  | 0.048 |
| H(39C) | 0.9473 | 0.0614  | 0.2082  | 0.048 |
| H(36A) | 0.3260 | 0.7637  | 0.3398  | 0.059 |
| H(36B) | 0.4397 | 0.7976  | 0.3869  | 0.059 |
| H(36C) | 0.3074 | 0.7848  | 0.4028  | 0.059 |
| H(40)  | 0.5356 | 0.1112  | 0.1684  | 0.031 |
| H(41)  | 0.9544 | 0.6040  | 0.3390  | 0.038 |
| H(42)  | 0.9430 | 0.8349  | 0.3292  | 0.040 |
| H(43A) | 0.9223 | 0.5730  | 0.2438  | 0.076 |
| H(43B) | 0.9598 | 0.6924  | 0.2693  | 0.076 |
| H(43C) | 0.8202 | 0.6211  | 0.2460  | 0.076 |
| H(44A) | 0.7031 | 0.4902  | 0.2955  | 0.057 |
| H(44B) | 0.7653 | 0.4848  | 0.3525  | 0.057 |
| H(44C) | 0.8077 | 0.4449  | 0.2964  | 0.057 |
| H(45A) | 1.0938 | 0.7702  | 0.3533  | 0.067 |
| H(45B) | 1.1125 | 0.8378  | 0.4141  | 0.067 |
| H(45C) | 1.1410 | 0.8921  | 0.3641  | 0.067 |
| H(46A) | 1.0014 | 0.9765  | 0.4020  | 0.069 |
| H(46B) | 0.9514 | 0.9044  | 0.4432  | 0.069 |
| H(46C) | 0.8584 | 0.9100  | 0.3963  | 0.069 |
| H(47A) | 0.9299 | 0.0140  | 0.0370  | 0.054 |
| H(47B) | 0.9579 | 0.0229  | 0.1012  | 0.054 |
| H(47C) | 1.0356 | -0.0183 | 0.0599  | 0.054 |
| H(48)  | 1.1253 | 0.1417  | 0.0407  | 0.030 |
| H(52)  | 0.4169 | 0.7359  | 0.5084  | 0.036 |
| H(63A) | 1.0784 | 0.2545  | -0.1677 | 0.062 |
| H(63B) | 1.0892 | 0.2059  | -0.1166 | 0.062 |
| H(63C) | 1.0856 | 0.3177  | -0.1069 | 0.062 |
| H(64A) | 0.8966 | 0.1100  | -0.2132 | 0.062 |
| H(64B) | 0.7828 | 0.0674  | -0.1817 | 0.062 |
| H(64C) | 0.9081 | 0.0554  | -0.1648 | 0.062 |
| H(66)  | 0.4653 | 0.2037  | 0.1113  | 0.048 |
| H(67)  | 0.4704 | 0.3673  | 0.1476  | 0.058 |
| H(72A) | 1.2220 | 0.1144  | 0.1184  | 0.070 |
| H(72B) | 1.1506 | 0.1688  | 0.1569  | 0.070 |
| H(72C) | 1.2489 | 0.2330  | 0.1237  | 0.070 |
| H(71)  | 0.6756 | -0.0484 | -0.0138 | 0.024 |
| H(68A) | 0.8714 | 0.1582  | 0.2877  | 0.052 |
| H(68B) | 0.8356 | 0.0570  | 0.3106  | 0.052 |
| H(68C) | 0.7347 | 0.1028  | 0.2990  | 0.052 |
| H(75A) | 0.6822 | 0.2661  | 0.2248  | 0.060 |
| H(75B) | 0.6650 | 0.2138  | 0.2758  | 0.060 |
| H(75C) | 0.5534 | 0.2318  | 0.2469  | 0.060 |
| H(76A) | 0.8868 | 0.2785  | -0.1947 | 0.094 |
| H(76B) | 0.8937 | 0.3396  | -0.1334 | 0.094 |
| H(76C) | 0.7735 | 0.2419  | -0.1620 | 0.094 |
| H(77)  | 0.8232 | 0.4903  | 0.1269  | 0.055 |

Continued on next page



**Table S37.** – continued from previous page

| <b>atom</b> | <b>x</b> | <b>y</b> | <b>z</b> | <b>U(eq)</b> |
|-------------|----------|----------|----------|--------------|
| H(78)       | 0.6498   | 0.5107   | 0.1573   | 0.063        |
| H(97)       | 0.5851   | -0.2191  | -0.0119  | 0.027        |
| H(83)       | 1.0359   | 0.2388   | -0.0346  | 0.031        |
| H(85)       | 0.6897   | 0.1313   | -0.1098  | 0.038        |
| H(86)       | 0.6173   | 0.0999   | -0.0296  | 0.037        |
| H(92A)      | 0.3514   | -0.3076  | 0.0933   | 0.065        |
| H(92B)      | 0.4561   | -0.2827  | 0.1432   | 0.065        |
| H(92C)      | 0.3839   | -0.3980  | 0.1091   | 0.065        |
| H(79A)      | 0.3947   | -0.3563  | -0.0049  | 0.065        |
| H(79B)      | 0.4151   | -0.4504  | 0.0128   | 0.065        |
| H(79C)      | 0.5203   | -0.3719  | -0.0114  | 0.065        |
| H(80A)      | 0.5754   | -0.4196  | 0.0881   | 0.065        |
| H(80B)      | 0.6413   | -0.3092  | 0.1289   | 0.065        |
| H(80C)      | 0.6761   | -0.3296  | 0.0685   | 0.065        |

**Table S38.** Anisotropic displacement parameters ( $\text{\AA}^2$ ) for  $[\{\text{PC}(\text{sp}^3)(\text{OPhP})\}^{\text{tBu}}\text{PdI}]$  (**11**). The anisotropic displacement factor exponent takes the form:  $-2\pi^2[h^2a^*{}^2U_{11} + \dots + 2hka^*b^*U_{12}]$ .

| atom  | $U_{11}$   | $U_{22}$   | $U_{33}$   | $U_{23}$   | $U_{13}$    | $U_{12}$   |
|-------|------------|------------|------------|------------|-------------|------------|
| Pd(1) | 0.0100(5)  | 0.0099(5)  | 0.0099(6)  | 0.0017(4)  | 0.0019(3)   | 0.0040(4)  |
| I(1)  | 0.0162(5)  | 0.0185(6)  | 0.0155(5)  | 0.0004(4)  | -0.0027(3)  | 0.0007(4)  |
| P(1)  | 0.0139(5)  | 0.0187(5)  | 0.0186(5)  | 0.0052(4)  | 0.0002(4)   | 0.0043(4)  |
| O(1)  | 0.0246(17) | 0.0311(18) | 0.0338(18) | 0.0039(14) | 0.0036(14)  | 0.0126(14) |
| C(62) | 0.056(4)   | 0.021(3)   | 0.066(4)   | 0.013(3)   | 0.026(3)    | 0.011(2)   |
| C(65) | 0.037(3)   | 0.032(3)   | 0.041(3)   | 0.006(2)   | 0.001(2)    | 0.017(2)   |
| C(60) | 0.034(3)   | 0.028(3)   | 0.040(3)   | 0.002(2)   | 0.010(2)    | 0.000(2)   |
| C(59) | 0.024(2)   | 0.027(2)   | 0.022(2)   | 0.0019(19) | 0.0053(18)  | 0.0017(19) |
| C(58) | 0.035(3)   | 0.033(3)   | 0.027(2)   | 0.004(2)   | 0.003(2)    | 0.018(2)   |
| C(57) | 0.024(2)   | 0.037(3)   | 0.042(3)   | -0.002(2)  | 0.010(2)    | 0.006(2)   |
| C(56) | 0.028(3)   | 0.025(2)   | 0.038(3)   | 0.004(2)   | 0.004(2)    | 0.010(2)   |
| C(55) | 0.035(3)   | 0.024(3)   | 0.051(3)   | 0.005(2)   | 0.000(2)    | 0.009(2)   |
| C(54) | 0.048(3)   | 0.029(3)   | 0.047(3)   | -0.006(2)  | -0.007(3)   | 0.022(3)   |
| C(53) | 0.036(3)   | 0.041(3)   | 0.034(3)   | 0.002(2)   | 0.002(2)    | 0.023(2)   |
| C(61) | 0.031(3)   | 0.042(3)   | 0.057(4)   | 0.003(3)   | 0.019(3)    | -0.003(2)  |
| I     | 0.0280(2)  | 0.0650(3)  | 0.0559(2)  | 0.0477(2)  | -0.0039(2)  | -0.0016(2) |
| O     | 0.0193(15) | 0.0217(15) | 0.0262(16) | 0.0024(13) | 0.0024(12)  | 0.0079(12) |
| Pd    | 0.0130(2)  | 0.0204(2)  | 0.0211(2)  | 0.0097(1)  | -0.0001(1)  | 0.0027(1)  |
| P(2)  | 0.0134(5)  | 0.0260(6)  | 0.0196(6)  | 0.0099(5)  | 0.0013(4)   | 0.0030(4)  |
| P(4)  | 0.0177(5)  | 0.0173(5)  | 0.0205(6)  | -0.0034(4) | 0.0051(4)   | 0.0006(4)  |
| C(10) | 0.029(2)   | 0.017(2)   | 0.034(3)   | 0.0033(19) | 0.005(2)    | 0.0042(19) |
| C(11) | 0.014(2)   | 0.017(2)   | 0.018(2)   | 0.0048(16) | 0.0055(16)  | 0.0049(16) |
| C     | 0.014(2)   | 0.019(2)   | 0.019(2)   | 0.0049(17) | 0.0041(16)  | 0.0047(17) |
| C(12) | 0.017(2)   | 0.018(2)   | 0.019(2)   | 0.0050(16) | 0.0067(16)  | 0.0069(17) |
| C(13) | 0.017(2)   | 0.024(2)   | 0.021(2)   | 0.0035(18) | 0.0046(17)  | 0.0064(18) |
| C(16) | 0.016(2)   | 0.029(2)   | 0.025(2)   | 0.0097(19) | 0.0030(17)  | 0.0085(18) |
| C(15) | 0.027(2)   | 0.020(2)   | 0.030(2)   | 0.0095(19) | 0.0071(19)  | 0.0106(19) |
| C(14) | 0.020(2)   | 0.021(2)   | 0.025(2)   | 0.0052(18) | 0.0060(18)  | 0.0058(18) |
| C(20) | 0.016(2)   | 0.027(2)   | 0.023(2)   | 0.0054(18) | -0.0010(17) | 0.0042(18) |
| C(19) | 0.030(3)   | 0.024(3)   | 0.051(3)   | -0.001(2)  | 0.010(2)    | -0.003(2)  |
| C(18) | 0.044(3)   | 0.021(2)   | 0.048(3)   | 0.006(2)   | -0.004(2)   | 0.007(2)   |
| C(17) | 0.043(3)   | 0.023(2)   | 0.034(3)   | -0.003(2)  | 0.003(2)    | 0.010(2)   |
| C(21) | 0.019(2)   | 0.017(2)   | 0.016(2)   | 0.0032(16) | 0.0006(16)  | 0.0074(17) |
| C(22) | 0.016(2)   | 0.019(2)   | 0.018(2)   | 0.0040(17) | 0.0025(16)  | 0.0067(17) |
| C(23) | 0.015(2)   | 0.021(2)   | 0.021(2)   | 0.0050(17) | 0.0056(17)  | 0.0053(17) |
| C(24) | 0.018(2)   | 0.019(2)   | 0.018(2)   | 0.0027(17) | 0.0003(17)  | 0.0062(17) |
| C(25) | 0.023(2)   | 0.026(2)   | 0.018(2)   | 0.0066(18) | 0.0016(17)  | 0.0085(19) |
| C(26) | 0.016(2)   | 0.026(2)   | 0.025(2)   | 0.0085(18) | 0.0053(17)  | 0.0081(18) |
| C(27) | 0.023(2)   | 0.046(3)   | 0.025(2)   | 0.012(2)   | 0.0005(19)  | 0.013(2)   |
| C(28) | 0.031(3)   | 0.034(3)   | 0.035(3)   | 0.005(2)   | -0.012(2)   | 0.002(2)   |
| C(29) | 0.022(2)   | 0.056(3)   | 0.032(3)   | 0.005(2)   | 0.001(2)    | 0.021(2)   |
| C(30) | 0.021(2)   | 0.022(2)   | 0.017(2)   | 0.0028(17) | 0.0022(17)  | 0.0021(18) |
| C(31) | 0.017(2)   | 0.024(2)   | 0.021(2)   | 0.0055(18) | -0.0012(17) | 0.0045(18) |
| C(32) | 0.023(2)   | 0.024(2)   | 0.022(2)   | 0.0043(18) | 0.0007(18)  | 0.0121(19) |
| C(33) | 0.035(3)   | 0.042(3)   | 0.023(2)   | 0.005(2)   | 0.006(2)    | 0.017(2)   |
| C(81) | 0.052(3)   | 0.0198(19) | 0.048(3)   | 0.005(2)   | 0.014(3)    | 0.002(2)   |
| C(90) | 0.052(3)   | 0.0198(19) | 0.048(3)   | 0.005(2)   | 0.014(3)    | 0.002(2)   |
| C(99) | 0.052(3)   | 0.0198(19) | 0.048(3)   | 0.005(2)   | 0.014(3)    | 0.002(2)   |
| C(35) | 0.021(2)   | 0.035(3)   | 0.028(2)   | 0.003(2)   | 0.0044(19)  | 0.011(2)   |

Continued on next page

**Table S38.** – continued from previous page

| atom   | U <sub>11</sub> | U <sub>22</sub> | U <sub>33</sub> | U <sub>23</sub> | U <sub>13</sub> | U <sub>12</sub> |
|--------|-----------------|-----------------|-----------------|-----------------|-----------------|-----------------|
| C(34)  | 0.027(2)        | 0.043(3)        | 0.025(2)        | 0.014(2)        | -0.001(2)       | 0.012(2)        |
| C(39)  | 0.029(3)        | 0.036(3)        | 0.029(3)        | 0.009(2)        | 0.004(2)        | 0.011(2)        |
| C(36)  | 0.037(3)        | 0.036(3)        | 0.045(3)        | 0.002(2)        | -0.003(2)       | 0.020(2)        |
| C(40)  | 0.019(2)        | 0.029(2)        | 0.024(2)        | -0.0004(19)     | 0.0057(18)      | 0.0064(19)      |
| C(41)  | 0.027(2)        | 0.051(3)        | 0.018(2)        | 0.006(2)        | 0.0054(19)      | 0.016(2)        |
| C(42)  | 0.021(2)        | 0.036(3)        | 0.038(3)        | 0.019(2)        | 0.003(2)        | 0.000(2)        |
| C(43)  | 0.055(4)        | 0.071(4)        | 0.025(3)        | 0.012(3)        | 0.015(3)        | 0.021(3)        |
| C(44)  | 0.042(3)        | 0.037(3)        | 0.034(3)        | 0.003(2)        | 0.010(2)        | 0.017(2)        |
| C(45)  | 0.021(3)        | 0.051(3)        | 0.053(3)        | 0.024(3)        | 0.004(2)        | 0.000(2)        |
| C(46)  | 0.032(3)        | 0.031(3)        | 0.066(4)        | 0.018(3)        | 0.008(3)        | -0.003(2)       |
| C(47)  | 0.039(3)        | 0.036(3)        | 0.038(3)        | 0.010(2)        | 0.009(2)        | 0.019(2)        |
| C(48)  | 0.022(2)        | 0.033(3)        | 0.021(2)        | 0.0053(19)      | 0.0062(18)      | 0.013(2)        |
| C(51)  | 0.026(2)        | 0.023(2)        | 0.026(2)        | 0.0038(18)      | -0.0023(19)     | 0.0122(19)      |
| C(52)  | 0.026(2)        | 0.034(3)        | 0.031(3)        | 0.005(2)        | 0.001(2)        | 0.015(2)        |
| C(63)  | 0.043(3)        | 0.040(3)        | 0.036(3)        | 0.011(2)        | 0.019(2)        | 0.007(2)        |
| C(64)  | 0.037(3)        | 0.052(3)        | 0.034(3)        | 0.005(2)        | 0.009(2)        | 0.017(3)        |
| C(66)  | 0.038(3)        | 0.048(3)        | 0.035(3)        | 0.001(2)        | 0.006(2)        | 0.024(3)        |
| C(67)  | 0.053(4)        | 0.057(4)        | 0.044(3)        | -0.003(3)       | 0.005(3)        | 0.037(3)        |
| C(72)  | 0.040(3)        | 0.053(3)        | 0.046(3)        | 0.004(3)        | -0.003(3)       | 0.022(3)        |
| C(71)  | 0.018(2)        | 0.022(2)        | 0.015(2)        | 0.0017(17)      | 0.0020(16)      | 0.0023(17)      |
| C(70)  | 0.0106(19)      | 0.018(2)        | 0.023(2)        | 0.0009(17)      | 0.0010(16)      | 0.0040(16)      |
| C(69)  | 0.015(2)        | 0.018(2)        | 0.019(2)        | -0.0005(17)     | 0.0036(16)      | 0.0032(17)      |
| C(68)  | 0.028(3)        | 0.039(3)        | 0.025(3)        | 0.001(2)        | 0.002(2)        | 0.004(2)        |
| C(75)  | 0.033(3)        | 0.037(3)        | 0.045(3)        | -0.001(2)       | 0.012(2)        | 0.012(2)        |
| C(74)  | 0.032(3)        | 0.017(2)        | 0.030(2)        | 0.0014(19)      | 0.007(2)        | 0.0045(19)      |
| C(73)  | 0.018(2)        | 0.019(2)        | 0.025(2)        | 0.0019(18)      | 0.0036(17)      | 0.0055(17)      |
| C(76)  | 0.090(5)        | 0.084(5)        | 0.064(4)        | 0.053(4)        | 0.052(4)        | 0.065(4)        |
| C(77)  | 0.052(3)        | 0.034(3)        | 0.048(3)        | 0.002(2)        | -0.003(3)       | 0.017(3)        |
| C(78)  | 0.059(4)        | 0.045(3)        | 0.052(4)        | -0.005(3)       | -0.004(3)       | 0.029(3)        |
| C(97)  | 0.021(2)        | 0.018(2)        | 0.019(2)        | -0.0053(17)     | 0.0016(17)      | 0.0010(18)      |
| C(91)  | 0.013(2)        | 0.015(2)        | 0.027(2)        | 0.0019(17)      | 0.0065(17)      | 0.0035(16)      |
| C(98)  | 0.021(2)        | 0.017(2)        | 0.030(2)        | 0.0071(18)      | 0.0051(18)      | 0.0078(18)      |
| C(82)  | 0.020(2)        | 0.018(2)        | 0.030(2)        | 0.0012(18)      | 0.0094(19)      | 0.0042(18)      |
| C(83)  | 0.024(2)        | 0.018(2)        | 0.029(2)        | -0.0005(18)     | 0.012(2)        | 0.0016(18)      |
| C(84)  | 0.031(2)        | 0.016(2)        | 0.035(3)        | 0.0094(19)      | 0.015(2)        | 0.0119(19)      |
| C(85)  | 0.029(3)        | 0.041(3)        | 0.032(3)        | 0.018(2)        | 0.005(2)        | 0.016(2)        |
| C(86)  | 0.019(2)        | 0.040(3)        | 0.040(3)        | 0.021(2)        | 0.008(2)        | 0.010(2)        |
| C(87)  | 0.036(3)        | 0.033(3)        | 0.035(3)        | 0.016(2)        | 0.014(2)        | 0.020(2)        |
| C(92)  | 0.052(3)        | 0.0198(19)      | 0.048(3)        | 0.005(2)        | 0.014(3)        | 0.002(2)        |
| C(79)  | 0.052(3)        | 0.0198(19)      | 0.048(3)        | 0.005(2)        | 0.014(3)        | 0.002(2)        |
| C(80)  | 0.052(3)        | 0.0198(19)      | 0.048(3)        | 0.005(2)        | 0.014(3)        | 0.002(2)        |
| I(3)   | 0.0474(16)      | 0.0558(19)      | 0.0388(15)      | -0.0255(11)     | 0.0112(11)      | -0.0270(11)     |
| Pd(91) | 0.0244(17)      | 0.0255(19)      | 0.036(2)        | -0.0128(12)     | 0.0102(13)      | -0.0112(11)     |
| P(3)   | 0.0213(6)       | 0.0255(6)       | 0.0262(6)       | 0.0000(5)       | 0.0061(5)       | 0.0010(5)       |

**Table S39.** Distances [Å] for  $[\{\text{PC}(\text{sp}^3)(\text{OPhP})\}^{\text{tBu}}\text{PdI}]$  (**11**).

| atom – atom    | distance | atom – atom    | distance   |
|----------------|----------|----------------|------------|
| Pd(1) – C(91)  | 2.130(5) | Pd(1) – P(3)   | 2.284(3)   |
| Pd(1) – P(4)   | 2.293(3) | Pd(1) – I(1)   | 2.681(4)   |
| P(1) – C(12)   | 1.826(4) | P(1) – C(31)   | 1.837(4)   |
| P(1) – C(32)   | 1.851(4) | P(1) – Pd      | 2.3282(10) |
| O(1) – C(58)   | 1.378(5) | O(1) – C(91)   | 1.466(5)   |
| C(62) – C(60)  | 1.539(7) | C(62) – H(62A) | 0.9800     |
| C(62) – H(62B) | 0.9800   | C(62) – H(62C) | 0.9800     |
| C(65) – C(58)  | 1.386(7) | C(65) – C(77)  | 1.389(7)   |
| C(65) – H(65)  | 0.9500   | C(60) – C(61)  | 1.533(7)   |
| C(60) – P(3)   | 1.833(5) | C(60) – H(60)  | 1.0000     |
| C(59) – C(68)  | 1.525(6) | C(59) – C(39)  | 1.525(6)   |
| C(59) – P(4)   | 1.851(5) | C(59) – H(59)  | 1.0000     |
| C(58) – C(66)  | 1.392(7) | C(57) – C(40)  | 1.533(6)   |
| C(57) – H(57A) | 0.9800   | C(57) – H(57B) | 0.9800     |
| C(57) – H(57C) | 0.9800   | C(56) – C(51)  | 1.383(6)   |
| C(56) – C(55)  | 1.395(6) | C(56) – H(56)  | 0.9500     |
| C(55) – C(54)  | 1.377(7) | C(55) – H(55)  | 0.9500     |
| C(54) – C(53)  | 1.380(7) | C(54) – H(54)  | 0.9500     |
| C(53) – C(52)  | 1.385(7) | C(53) – H(53)  | 0.9500     |
| C(61) – H(61A) | 0.9800   | C(61) – H(61B) | 0.9800     |
| C(61) – H(61C) | 0.9800   | I – Pd         | 2.6746(4)  |
| O – C(51)      | 1.378(5) | O – C          | 1.477(5)   |
| Pd – C         | 2.089(4) | Pd – P(2)      | 2.2741(11) |
| P(2) – C(22)   | 1.824(4) | P(2) – C(41)   | 1.849(5)   |
| P(2) – C(42)   | 1.853(5) | P(4) – C(69)   | 1.836(4)   |
| P(4) – C(40)   | 1.850(4) | P(4) – Pd(91)  | 2.378(7)   |
| C(10) – C(18)  | 1.522(6) | C(10) – C(19)  | 1.527(6)   |
| C(10) – C(17)  | 1.531(7) | C(10) – C(14)  | 1.543(6)   |
| C(11) – C(16)  | 1.387(6) | C(11) – C(12)  | 1.409(5)   |
| C(11) – C      | 1.518(5) | C – C(21)      | 1.528(5)   |
| C(12) – C(13)  | 1.392(6) | C(13) – C(14)  | 1.406(6)   |
| C(13) – H(13)  | 0.9500   | C(16) – C(15)  | 1.393(6)   |
| C(16) – H(16)  | 0.9500   | C(15) – C(14)  | 1.378(6)   |
| C(15) – H(15)  | 0.9500   | C(20) – C(27)  | 1.523(6)   |
| C(20) – C(29)  | 1.529(6) | C(20) – C(28)  | 1.531(6)   |
| C(20) – C(24)  | 1.536(6) | C(19) – H(19A) | 0.9800     |
| C(19) – H(19B) | 0.9800   | C(19) – H(19C) | 0.9800     |
| C(18) – H(18A) | 0.9800   | C(18) – H(18B) | 0.9800     |
| C(18) – H(18C) | 0.9800   | C(17) – H(17A) | 0.9800     |
| C(17) – H(17B) | 0.9800   | C(17) – H(17C) | 0.9800     |
| C(21) – C(26)  | 1.391(6) | C(21) – C(22)  | 1.395(6)   |
| C(22) – C(23)  | 1.389(6) | C(23) – C(24)  | 1.390(6)   |
| C(23) – H(23)  | 0.9500   | C(24) – C(25)  | 1.398(6)   |
| C(25) – C(26)  | 1.380(6) | C(25) – H(25)  | 0.9500     |
| C(26) – H(26)  | 0.9500   | C(27) – H(27A) | 0.9800     |
| C(27) – H(27B) | 0.9800   | C(27) – H(27C) | 0.9800     |
| C(28) – H(28A) | 0.9800   | C(28) – H(28B) | 0.9800     |
| C(28) – H(28C) | 0.9800   | C(29) – H(29A) | 0.9800     |
| C(29) – H(29B) | 0.9800   | C(29) – H(29C) | 0.9800     |
| C(30) – C(69)  | 1.389(6) | C(30) – C(73)  | 1.392(6)   |

Continued on next page

**Table S39.** – continued from previous page

| <b>atom – atom</b> | <b>distance</b> | <b>atom – atom</b> | <b>distance</b> |
|--------------------|-----------------|--------------------|-----------------|
| C(30) – H(30)      | 0.9500          | C(31) – C(34)      | 1.528(6)        |
| C(31) – C(33)      | 1.530(6)        | C(31) – H(31)      | 1.0000          |
| C(32) – C(35)      | 1.527(6)        | C(32) – C(36)      | 1.530(6)        |
| C(32) – H(32)      | 1.0000          | C(33) – H(33A)     | 0.9800          |
| C(33) – H(33B)     | 0.9800          | C(33) – H(33C)     | 0.9800          |
| C(81) – C(74)      | 1.573(18)       | C(81) – H(81A)     | 0.9800          |
| C(81) – H(81B)     | 0.9800          | C(81) – H(81C)     | 0.9800          |
| C(90) – C(74)      | 1.463(16)       | C(90) – H(90A)     | 0.9800          |
| C(90) – H(90B)     | 0.9800          | C(90) – H(90C)     | 0.9800          |
| C(99) – C(74)      | 1.568(16)       | C(99) – H(99A)     | 0.9800          |
| C(99) – H(99B)     | 0.9800          | C(99) – H(99C)     | 0.9800          |
| C(35) – H(35A)     | 0.9800          | C(35) – H(35B)     | 0.9800          |
| C(35) – H(35C)     | 0.9800          | C(34) – H(34A)     | 0.9800          |
| C(34) – H(34B)     | 0.9800          | C(34) – H(34C)     | 0.9800          |
| C(39) – H(39A)     | 0.9800          | C(39) – H(39B)     | 0.9800          |
| C(39) – H(39C)     | 0.9800          | C(36) – H(36A)     | 0.9800          |
| C(36) – H(36B)     | 0.9800          | C(36) – H(36C)     | 0.9800          |
| C(40) – C(75)      | 1.535(6)        | C(40) – H(40)      | 1.0000          |
| C(41) – C(43)      | 1.521(7)        | C(41) – C(44)      | 1.525(7)        |
| C(41) – H(41)      | 1.0000          | C(42) – C(46)      | 1.514(7)        |
| C(42) – C(45)      | 1.519(7)        | C(42) – H(42)      | 1.0000          |
| C(43) – H(43A)     | 0.9800          | C(43) – H(43B)     | 0.9800          |
| C(43) – H(43C)     | 0.9800          | C(44) – H(44A)     | 0.9800          |
| C(44) – H(44B)     | 0.9800          | C(44) – H(44C)     | 0.9800          |
| C(45) – H(45A)     | 0.9800          | C(45) – H(45B)     | 0.9800          |
| C(45) – H(45C)     | 0.9800          | C(46) – H(46A)     | 0.9800          |
| C(46) – H(46B)     | 0.9800          | C(46) – H(46C)     | 0.9800          |
| C(47) – C(48)      | 1.518(6)        | C(47) – H(47A)     | 0.9800          |
| C(47) – H(47B)     | 0.9800          | C(47) – H(47C)     | 0.9800          |
| C(48) – C(72)      | 1.521(6)        | C(48) – P(3)       | 1.860(4)        |
| C(48) – H(48)      | 1.0000          | C(51) – C(52)      | 1.387(6)        |
| C(52) – H(52)      | 0.9500          | C(63) – C(87)      | 1.519(7)        |
| C(63) – H(63A)     | 0.9800          | C(63) – H(63B)     | 0.9800          |
| C(63) – H(63C)     | 0.9800          | C(64) – C(87)      | 1.528(7)        |
| C(64) – H(64A)     | 0.9800          | C(64) – H(64B)     | 0.9800          |
| C(64) – H(64C)     | 0.9800          | C(66) – C(67)      | 1.389(7)        |
| C(66) – H(66)      | 0.9500          | C(67) – C(78)      | 1.380(8)        |
| C(67) – H(67)      | 0.9500          | C(72) – H(72A)     | 0.9800          |
| C(72) – H(72B)     | 0.9800          | C(72) – H(72C)     | 0.9800          |
| C(71) – C(70)      | 1.386(5)        | C(71) – C(97)      | 1.389(6)        |
| C(71) – H(71)      | 0.9500          | C(70) – C(69)      | 1.400(6)        |
| C(70) – C(91)      | 1.524(5)        | C(68) – H(68A)     | 0.9800          |
| C(68) – H(68B)     | 0.9800          | C(68) – H(68C)     | 0.9800          |
| C(75) – H(75A)     | 0.9800          | C(75) – H(75B)     | 0.9800          |
| C(75) – H(75C)     | 0.9800          | C(74) – C(92)      | 1.471(12)       |
| C(74) – C(79)      | 1.530(10)       | C(74) – C(73)      | 1.534(6)        |
| C(74) – C(80)      | 1.550(11)       | C(73) – C(97)      | 1.383(6)        |
| C(76) – C(87)      | 1.531(7)        | C(76) – H(76A)     | 0.9800          |
| C(76) – H(76B)     | 0.9800          | C(76) – H(76C)     | 0.9800          |
| C(77) – C(78)      | 1.388(8)        | C(77) – H(77)      | 0.9500          |
| C(78) – H(78)      | 0.9500          | C(97) – H(97)      | 0.9500          |

Continued on next page

**Table S39.** – continued from previous page

| <b>atom – atom</b> | <b>distance</b> | <b>atom – atom</b> | <b>distance</b> |
|--------------------|-----------------|--------------------|-----------------|
| C(91) – C(98)      | 1.521(6)        | C(91) – Pd(91)     | 1.983(9)        |
| C(98) – C(86)      | 1.389(6)        | C(98) – C(82)      | 1.398(6)        |
| C(82) – C(83)      | 1.402(6)        | C(82) – P(3)       | 1.838(5)        |
| C(83) – C(84)      | 1.387(6)        | C(83) – H(83)      | 0.9500          |
| C(84) – C(85)      | 1.401(6)        | C(84) – C(87)      | 1.529(6)        |
| C(85) – C(86)      | 1.380(6)        | C(85) – H(85)      | 0.9500          |
| C(86) – H(86)      | 0.9500          | C(92) – H(92A)     | 0.9800          |
| C(92) – H(92B)     | 0.9800          | C(92) – H(92C)     | 0.9800          |
| C(79) – H(79A)     | 0.9800          | C(79) – H(79B)     | 0.9800          |
| C(79) – H(79C)     | 0.9800          | C(80) – H(80A)     | 0.9800          |
| C(80) – H(80B)     | 0.9800          | C(80) – H(80C)     | 0.9800          |
| I(3) – Pd(91)      | 2.678(7)        | Pd(91) – P(3)      | 2.248(6)        |

**Table S40.** Angles [°] for  $[\{\text{PC}(\text{sp}^3)(\text{OPhP})\}^{\text{tBu}}\text{PdI}]$  (**11**).

| atom – atom – atom      | angle      | atom – atom – atom      | angle      |
|-------------------------|------------|-------------------------|------------|
| C(91) – Pd(1) – P(3)    | 83.96(15)  | C(91) – Pd(1) – P(4)    | 81.64(16)  |
| P(3) – Pd(1) – P(4)     | 151.40(16) | C(91) – Pd(1) – I(1)    | 167.44(16) |
| P(3) – Pd(1) – I(1)     | 97.12(13)  | P(4) – Pd(1) – I(1)     | 102.27(12) |
| C(12) – P(1) – C(31)    | 104.42(19) | C(12) – P(1) – C(32)    | 106.14(18) |
| C(31) – P(1) – C(32)    | 105.78(19) | C(12) – P(1) – Pd       | 94.94(13)  |
| C(31) – P(1) – Pd       | 119.81(14) | C(32) – P(1) – Pd       | 122.58(14) |
| C(58) – O(1) – C(91)    | 121.0(3)   | C(60) – C(62) – H(62A)  | 109.5      |
| C(60) – C(62) – H(62B)  | 109.5      | H(62A) – C(62) – H(62B) | 109.5      |
| C(60) – C(62) – H(62C)  | 109.5      | H(62A) – C(62) – H(62C) | 109.5      |
| H(62B) – C(62) – H(62C) | 109.5      | C(58) – C(65) – C(77)   | 119.2(5)   |
| C(58) – C(65) – H(65)   | 120.4      | C(77) – C(65) – H(65)   | 120.4      |
| C(61) – C(60) – C(62)   | 111.4(4)   | C(61) – C(60) – P(3)    | 116.6(3)   |
| C(62) – C(60) – P(3)    | 109.7(4)   | C(61) – C(60) – H(60)   | 106.1      |
| C(62) – C(60) – H(60)   | 106.1      | P(3) – C(60) – H(60)    | 106.1      |
| C(68) – C(59) – C(39)   | 110.6(4)   | C(68) – C(59) – P(4)    | 114.0(3)   |
| C(39) – C(59) – P(4)    | 110.6(3)   | C(68) – C(59) – H(59)   | 107.1      |
| C(39) – C(59) – H(59)   | 107.1      | P(4) – C(59) – H(59)    | 107.1      |
| O(1) – C(58) – C(65)    | 125.1(4)   | O(1) – C(58) – C(66)    | 114.6(4)   |
| C(65) – C(58) – C(66)   | 120.2(4)   | C(40) – C(57) – H(57A)  | 109.5      |
| C(40) – C(57) – H(57B)  | 109.5      | H(57A) – C(57) – H(57B) | 109.5      |
| C(40) – C(57) – H(57C)  | 109.5      | H(57A) – C(57) – H(57C) | 109.5      |
| H(57B) – C(57) – H(57C) | 109.5      | C(51) – C(56) – C(55)   | 119.5(4)   |
| C(51) – C(56) – H(56)   | 120.3      | C(55) – C(56) – H(56)   | 120.3      |
| C(54) – C(55) – C(56)   | 120.9(5)   | C(54) – C(55) – H(55)   | 119.5      |
| C(56) – C(55) – H(55)   | 119.5      | C(55) – C(54) – C(53)   | 119.1(5)   |
| C(55) – C(54) – H(54)   | 120.5      | C(53) – C(54) – H(54)   | 120.5      |
| C(54) – C(53) – C(52)   | 120.8(5)   | C(54) – C(53) – H(53)   | 119.6      |
| C(52) – C(53) – H(53)   | 119.6      | C(60) – C(61) – H(61A)  | 109.5      |
| C(60) – C(61) – H(61B)  | 109.5      | H(61A) – C(61) – H(61B) | 109.5      |
| C(60) – C(61) – H(61C)  | 109.5      | H(61A) – C(61) – H(61C) | 109.5      |
| H(61B) – C(61) – H(61C) | 109.5      | C(51) – O – C           | 121.8(3)   |
| C – Pd – P(2)           | 85.27(11)  | C – Pd – P(1)           | 81.33(11)  |
| P(2) – Pd – P(1)        | 157.20(4)  | C – Pd – I              | 175.82(11) |
| P(2) – Pd – I           | 93.57(3)   | P(1) – Pd – I           | 101.02(3)  |
| C(22) – P(2) – C(41)    | 103.7(2)   | C(22) – P(2) – C(42)    | 110.6(2)   |
| C(41) – P(2) – C(42)    | 105.2(2)   | C(22) – P(2) – Pd       | 102.73(13) |
| C(41) – P(2) – Pd       | 115.15(16) | C(42) – P(2) – Pd       | 118.54(16) |
| C(69) – P(4) – C(40)    | 106.09(19) | C(69) – P(4) – C(59)    | 103.16(19) |
| C(40) – P(4) – C(59)    | 107.3(2)   | C(69) – P(4) – Pd(1)    | 97.42(15)  |
| C(40) – P(4) – Pd(1)    | 124.42(16) | C(59) – P(4) – Pd(1)    | 115.32(16) |
| C(69) – P(4) – Pd(91)   | 95.9(2)    | C(40) – P(4) – Pd(91)   | 120.5(2)   |
| C(59) – P(4) – Pd(91)   | 120.6(3)   | C(18) – C(10) – C(19)   | 108.7(4)   |
| C(18) – C(10) – C(17)   | 109.0(4)   | C(19) – C(10) – C(17)   | 109.1(4)   |
| C(18) – C(10) – C(14)   | 112.0(4)   | C(19) – C(10) – C(14)   | 108.9(4)   |
| C(17) – C(10) – C(14)   | 109.1(4)   | C(16) – C(11) – C(12)   | 117.6(4)   |
| C(16) – C(11) – C       | 124.8(4)   | C(12) – C(11) – C       | 117.6(3)   |
| O – C – C(11)           | 101.7(3)   | O – C – C(21)           | 108.1(3)   |
| C(11) – C – C(21)       | 114.8(3)   | O – C – Pd              | 111.3(2)   |
| C(11) – C – Pd          | 105.3(3)   | C(21) – C – Pd          | 114.8(3)   |
| C(13) – C(12) – C(11)   | 120.4(4)   | C(13) – C(12) – P(1)    | 125.0(3)   |

Continued on next page

**Table S40.** – continued from previous page

| <b>atom – atom – atom</b> | <b>angle</b> | <b>atom – atom – atom</b> | <b>angle</b> |
|---------------------------|--------------|---------------------------|--------------|
| C(11) – C(12) – P(1)      | 113.9(3)     | C(12) – C(13) – C(14)     | 121.8(4)     |
| C(12) – C(13) – H(13)     | 119.1        | C(14) – C(13) – H(13)     | 119.1        |
| C(11) – C(16) – C(15)     | 121.2(4)     | C(11) – C(16) – H(16)     | 119.4        |
| C(15) – C(16) – H(16)     | 119.4        | C(14) – C(15) – C(16)     | 122.2(4)     |
| C(14) – C(15) – H(15)     | 118.9        | C(16) – C(15) – H(15)     | 118.9        |
| C(15) – C(14) – C(13)     | 116.8(4)     | C(15) – C(14) – C(10)     | 123.2(4)     |
| C(13) – C(14) – C(10)     | 119.9(4)     | C(27) – C(20) – C(29)     | 107.5(4)     |
| C(27) – C(20) – C(28)     | 109.0(4)     | C(29) – C(20) – C(28)     | 109.4(4)     |
| C(27) – C(20) – C(24)     | 112.4(3)     | C(29) – C(20) – C(24)     | 110.4(3)     |
| C(28) – C(20) – C(24)     | 108.1(3)     | C(10) – C(19) – H(19A)    | 109.5        |
| C(10) – C(19) – H(19B)    | 109.5        | H(19A) – C(19) – H(19B)   | 109.5        |
| C(10) – C(19) – H(19C)    | 109.5        | H(19A) – C(19) – H(19C)   | 109.5        |
| H(19B) – C(19) – H(19C)   | 109.5        | C(10) – C(18) – H(18A)    | 109.5        |
| C(10) – C(18) – H(18B)    | 109.5        | H(18A) – C(18) – H(18B)   | 109.5        |
| C(10) – C(18) – H(18C)    | 109.5        | H(18A) – C(18) – H(18C)   | 109.5        |
| H(18B) – C(18) – H(18C)   | 109.5        | C(10) – C(17) – H(17A)    | 109.5        |
| C(10) – C(17) – H(17B)    | 109.5        | H(17A) – C(17) – H(17B)   | 109.5        |
| C(10) – C(17) – H(17C)    | 109.5        | H(17A) – C(17) – H(17C)   | 109.5        |
| H(17B) – C(17) – H(17C)   | 109.5        | C(26) – C(21) – C(22)     | 118.1(4)     |
| C(26) – C(21) – C         | 120.9(4)     | C(22) – C(21) – C         | 121.0(3)     |
| C(23) – C(22) – C(21)     | 120.2(4)     | C(23) – C(22) – P(2)      | 125.3(3)     |
| C(21) – C(22) – P(2)      | 114.4(3)     | C(22) – C(23) – C(24)     | 122.3(4)     |
| C(22) – C(23) – H(23)     | 118.8        | C(24) – C(23) – H(23)     | 118.8        |
| C(23) – C(24) – C(25)     | 116.4(4)     | C(23) – C(24) – C(20)     | 120.2(4)     |
| C(25) – C(24) – C(20)     | 123.3(4)     | C(26) – C(25) – C(24)     | 122.0(4)     |
| C(26) – C(25) – H(25)     | 119.0        | C(24) – C(25) – H(25)     | 119.0        |
| C(25) – C(26) – C(21)     | 120.9(4)     | C(25) – C(26) – H(26)     | 119.6        |
| C(21) – C(26) – H(26)     | 119.6        | C(20) – C(27) – H(27A)    | 109.5        |
| C(20) – C(27) – H(27B)    | 109.5        | H(27A) – C(27) – H(27B)   | 109.5        |
| C(20) – C(27) – H(27C)    | 109.5        | H(27A) – C(27) – H(27C)   | 109.5        |
| H(27B) – C(27) – H(27C)   | 109.5        | C(20) – C(28) – H(28A)    | 109.5        |
| C(20) – C(28) – H(28B)    | 109.5        | H(28A) – C(28) – H(28B)   | 109.5        |
| C(20) – C(28) – H(28C)    | 109.5        | H(28A) – C(28) – H(28C)   | 109.5        |
| H(28B) – C(28) – H(28C)   | 109.5        | C(20) – C(29) – H(29A)    | 109.5        |
| C(20) – C(29) – H(29B)    | 109.5        | H(29A) – C(29) – H(29B)   | 109.5        |
| C(20) – C(29) – H(29C)    | 109.5        | H(29A) – C(29) – H(29C)   | 109.5        |
| H(29B) – C(29) – H(29C)   | 109.5        | C(69) – C(30) – C(73)     | 121.8(4)     |
| C(69) – C(30) – H(30)     | 119.1        | C(73) – C(30) – H(30)     | 119.1        |
| C(34) – C(31) – C(33)     | 110.6(4)     | C(34) – C(31) – P(1)      | 113.1(3)     |
| C(33) – C(31) – P(1)      | 110.7(3)     | C(34) – C(31) – H(31)     | 107.4        |
| C(33) – C(31) – H(31)     | 107.4        | P(1) – C(31) – H(31)      | 107.4        |
| C(35) – C(32) – C(36)     | 114.0(4)     | C(35) – C(32) – P(1)      | 113.4(3)     |
| C(36) – C(32) – P(1)      | 111.7(3)     | C(35) – C(32) – H(32)     | 105.6        |
| C(36) – C(32) – H(32)     | 105.6        | P(1) – C(32) – H(32)      | 105.6        |
| C(31) – C(33) – H(33A)    | 109.5        | C(31) – C(33) – H(33B)    | 109.5        |
| H(33A) – C(33) – H(33B)   | 109.5        | C(31) – C(33) – H(33C)    | 109.5        |
| H(33A) – C(33) – H(33C)   | 109.5        | H(33B) – C(33) – H(33C)   | 109.5        |
| C(74) – C(81) – H(81A)    | 109.5        | C(74) – C(81) – H(81B)    | 109.5        |
| H(81A) – C(81) – H(81B)   | 109.5        | C(74) – C(81) – H(81C)    | 109.5        |
| H(81A) – C(81) – H(81C)   | 109.5        | H(81B) – C(81) – H(81C)   | 109.5        |
| C(74) – C(90) – H(90A)    | 109.5        | C(74) – C(90) – H(90B)    | 109.5        |

Continued on next page



**Table S40.** – continued from previous page

| <b>atom – atom – atom</b> | <b>angle</b> | <b>atom – atom – atom</b> | <b>angle</b> |
|---------------------------|--------------|---------------------------|--------------|
| H(90A) – C(90) – H(90B)   | 109.5        | C(74) – C(90) – H(90C)    | 109.5        |
| H(90A) – C(90) – H(90C)   | 109.5        | H(90B) – C(90) – H(90C)   | 109.5        |
| C(74) – C(99) – H(99A)    | 109.5        | C(74) – C(99) – H(99B)    | 109.5        |
| H(99A) – C(99) – H(99B)   | 109.5        | C(74) – C(99) – H(99C)    | 109.5        |
| H(99A) – C(99) – H(99C)   | 109.5        | H(99B) – C(99) – H(99C)   | 109.5        |
| C(32) – C(35) – H(35A)    | 109.5        | C(32) – C(35) – H(35B)    | 109.5        |
| H(35A) – C(35) – H(35B)   | 109.5        | C(32) – C(35) – H(35C)    | 109.5        |
| H(35A) – C(35) – H(35C)   | 109.5        | H(35B) – C(35) – H(35C)   | 109.5        |
| C(31) – C(34) – H(34A)    | 109.5        | C(31) – C(34) – H(34B)    | 109.5        |
| H(34A) – C(34) – H(34B)   | 109.5        | C(31) – C(34) – H(34C)    | 109.5        |
| H(34A) – C(34) – H(34C)   | 109.5        | H(34B) – C(34) – H(34C)   | 109.5        |
| C(59) – C(39) – H(39A)    | 109.5        | C(59) – C(39) – H(39B)    | 109.5        |
| H(39A) – C(39) – H(39B)   | 109.5        | C(59) – C(39) – H(39C)    | 109.5        |
| H(39A) – C(39) – H(39C)   | 109.5        | H(39B) – C(39) – H(39C)   | 109.5        |
| C(32) – C(36) – H(36A)    | 109.5        | C(32) – C(36) – H(36B)    | 109.5        |
| H(36A) – C(36) – H(36B)   | 109.5        | C(32) – C(36) – H(36C)    | 109.5        |
| H(36A) – C(36) – H(36C)   | 109.5        | H(36B) – C(36) – H(36C)   | 109.5        |
| C(57) – C(40) – C(75)     | 112.4(4)     | C(57) – C(40) – P(4)      | 113.7(3)     |
| C(75) – C(40) – P(4)      | 110.8(3)     | C(57) – C(40) – H(40)     | 106.5        |
| C(75) – C(40) – H(40)     | 106.5        | P(4) – C(40) – H(40)      | 106.5        |
| C(43) – C(41) – C(44)     | 110.7(4)     | C(43) – C(41) – P(2)      | 113.5(4)     |
| C(44) – C(41) – P(2)      | 110.2(3)     | C(43) – C(41) – H(41)     | 107.4        |
| C(44) – C(41) – H(41)     | 107.4        | P(2) – C(41) – H(41)      | 107.4        |
| C(46) – C(42) – C(45)     | 110.7(4)     | C(46) – C(42) – P(2)      | 111.6(3)     |
| C(45) – C(42) – P(2)      | 116.8(4)     | C(46) – C(42) – H(42)     | 105.6        |
| C(45) – C(42) – H(42)     | 105.6        | P(2) – C(42) – H(42)      | 105.6        |
| C(41) – C(43) – H(43A)    | 109.5        | C(41) – C(43) – H(43B)    | 109.5        |
| H(43A) – C(43) – H(43B)   | 109.5        | C(41) – C(43) – H(43C)    | 109.5        |
| H(43A) – C(43) – H(43C)   | 109.5        | H(43B) – C(43) – H(43C)   | 109.5        |
| C(41) – C(44) – H(44A)    | 109.5        | C(41) – C(44) – H(44B)    | 109.5        |
| H(44A) – C(44) – H(44B)   | 109.5        | C(41) – C(44) – H(44C)    | 109.5        |
| H(44A) – C(44) – H(44C)   | 109.5        | H(44B) – C(44) – H(44C)   | 109.5        |
| C(42) – C(45) – H(45A)    | 109.5        | C(42) – C(45) – H(45B)    | 109.5        |
| H(45A) – C(45) – H(45B)   | 109.5        | C(42) – C(45) – H(45C)    | 109.5        |
| H(45A) – C(45) – H(45C)   | 109.5        | H(45B) – C(45) – H(45C)   | 109.5        |
| C(42) – C(46) – H(46A)    | 109.5        | C(42) – C(46) – H(46B)    | 109.5        |
| H(46A) – C(46) – H(46B)   | 109.5        | C(42) – C(46) – H(46C)    | 109.5        |
| H(46A) – C(46) – H(46C)   | 109.5        | H(46B) – C(46) – H(46C)   | 109.5        |
| C(48) – C(47) – H(47A)    | 109.5        | C(48) – C(47) – H(47B)    | 109.5        |
| H(47A) – C(47) – H(47B)   | 109.5        | C(48) – C(47) – H(47C)    | 109.5        |
| H(47A) – C(47) – H(47C)   | 109.5        | H(47B) – C(47) – H(47C)   | 109.5        |
| C(47) – C(48) – C(72)     | 111.0(4)     | C(47) – C(48) – P(3)      | 109.8(3)     |
| C(72) – C(48) – P(3)      | 112.3(3)     | C(47) – C(48) – H(48)     | 107.9        |
| C(72) – C(48) – H(48)     | 107.9        | P(3) – C(48) – H(48)      | 107.9        |
| O – C(51) – C(56)         | 125.2(4)     | O – C(51) – C(52)         | 115.0(4)     |
| C(56) – C(51) – C(52)     | 119.8(4)     | C(53) – C(52) – C(51)     | 119.9(5)     |
| C(53) – C(52) – H(52)     | 120.1        | C(51) – C(52) – H(52)     | 120.1        |
| C(87) – C(63) – H(63A)    | 109.5        | C(87) – C(63) – H(63B)    | 109.5        |
| H(63A) – C(63) – H(63B)   | 109.5        | C(87) – C(63) – H(63C)    | 109.5        |
| H(63A) – C(63) – H(63C)   | 109.5        | H(63B) – C(63) – H(63C)   | 109.5        |
| C(87) – C(64) – H(64A)    | 109.5        | C(87) – C(64) – H(64B)    | 109.5        |

Continued on next page

**Table S40.** – continued from previous page

| <b>atom – atom – atom</b> | <b>angle</b> | <b>atom – atom – atom</b> | <b>angle</b> |
|---------------------------|--------------|---------------------------|--------------|
| H(64A) – C(64) – H(64B)   | 109.5        | C(87) – C(64) – H(64C)    | 109.5        |
| H(64A) – C(64) – H(64C)   | 109.5        | H(64B) – C(64) – H(64C)   | 109.5        |
| C(67) – C(66) – C(58)     | 119.5(5)     | C(67) – C(66) – H(66)     | 120.3        |
| C(58) – C(66) – H(66)     | 120.3        | C(78) – C(67) – C(66)     | 120.9(5)     |
| C(78) – C(67) – H(67)     | 119.5        | C(66) – C(67) – H(67)     | 119.5        |
| C(48) – C(72) – H(72A)    | 109.5        | C(48) – C(72) – H(72B)    | 109.5        |
| H(72A) – C(72) – H(72B)   | 109.5        | C(48) – C(72) – H(72C)    | 109.5        |
| H(72A) – C(72) – H(72C)   | 109.5        | H(72B) – C(72) – H(72C)   | 109.5        |
| C(70) – C(71) – C(97)     | 120.7(4)     | C(70) – C(71) – H(71)     | 119.6        |
| C(97) – C(71) – H(71)     | 119.6        | C(71) – C(70) – C(69)     | 117.6(4)     |
| C(71) – C(70) – C(91)     | 124.9(4)     | C(69) – C(70) – C(91)     | 117.5(3)     |
| C(30) – C(69) – C(70)     | 120.7(4)     | C(30) – C(69) – P(4)      | 124.6(3)     |
| C(70) – C(69) – P(4)      | 114.4(3)     | C(59) – C(68) – H(68A)    | 109.5        |
| C(59) – C(68) – H(68B)    | 109.5        | H(68A) – C(68) – H(68B)   | 109.5        |
| C(59) – C(68) – H(68C)    | 109.5        | H(68A) – C(68) – H(68C)   | 109.5        |
| H(68B) – C(68) – H(68C)   | 109.5        | C(40) – C(75) – H(75A)    | 109.5        |
| C(40) – C(75) – H(75B)    | 109.5        | H(75A) – C(75) – H(75B)   | 109.5        |
| C(40) – C(75) – H(75C)    | 109.5        | H(75A) – C(75) – H(75C)   | 109.5        |
| H(75B) – C(75) – H(75C)   | 109.5        | C(90) – C(74) – C(92)     | 125.8(8)     |
| C(90) – C(74) – C(79)     | 79.6(8)      | C(92) – C(74) – C(79)     | 112.5(6)     |
| C(90) – C(74) – C(73)     | 113.1(6)     | C(92) – C(74) – C(73)     | 110.4(5)     |
| C(79) – C(74) – C(73)     | 111.4(5)     | C(92) – C(74) – C(80)     | 108.2(6)     |
| C(79) – C(74) – C(80)     | 107.1(6)     | C(73) – C(74) – C(80)     | 106.9(4)     |
| C(90) – C(74) – C(99)     | 109.0(9)     | C(92) – C(74) – C(99)     | 84.8(7)      |
| C(73) – C(74) – C(99)     | 109.3(6)     | C(80) – C(74) – C(99)     | 133.8(7)     |
| C(90) – C(74) – C(81)     | 107.9(9)     | C(79) – C(74) – C(81)     | 126.8(8)     |
| C(73) – C(74) – C(81)     | 112.8(7)     | C(80) – C(74) – C(81)     | 86.7(8)      |
| C(99) – C(74) – C(81)     | 104.3(9)     | C(97) – C(73) – C(30)     | 116.7(4)     |
| C(97) – C(73) – C(74)     | 121.6(4)     | C(30) – C(73) – C(74)     | 121.8(4)     |
| C(87) – C(76) – H(76A)    | 109.5        | C(87) – C(76) – H(76B)    | 109.5        |
| H(76A) – C(76) – H(76B)   | 109.5        | C(87) – C(76) – H(76C)    | 109.5        |
| H(76A) – C(76) – H(76C)   | 109.5        | H(76B) – C(76) – H(76C)   | 109.5        |
| C(78) – C(77) – C(65)     | 121.1(5)     | C(78) – C(77) – H(77)     | 119.5        |
| C(65) – C(77) – H(77)     | 119.5        | C(67) – C(78) – C(77)     | 119.0(5)     |
| C(67) – C(78) – H(78)     | 120.5        | C(77) – C(78) – H(78)     | 120.5        |
| C(73) – C(97) – C(71)     | 122.4(4)     | C(73) – C(97) – H(97)     | 118.8        |
| C(71) – C(97) – H(97)     | 118.8        | O(1) – C(91) – C(98)      | 110.1(3)     |
| O(1) – C(91) – C(70)      | 101.0(3)     | C(98) – C(91) – C(70)     | 114.0(3)     |
| O(1) – C(91) – Pd(91)     | 105.9(3)     | C(98) – C(91) – Pd(91)    | 112.9(3)     |
| C(70) – C(91) – Pd(91)    | 111.9(4)     | O(1) – C(91) – Pd(1)      | 108.4(3)     |
| C(98) – C(91) – Pd(1)     | 115.2(3)     | C(70) – C(91) – Pd(1)     | 107.1(3)     |
| C(86) – C(98) – C(82)     | 118.3(4)     | C(86) – C(98) – C(91)     | 121.3(4)     |
| C(82) – C(98) – C(91)     | 120.3(4)     | C(98) – C(82) – C(83)     | 120.0(4)     |
| C(98) – C(82) – P(3)      | 114.5(3)     | C(83) – C(82) – P(3)      | 125.4(3)     |
| C(84) – C(83) – C(82)     | 122.3(4)     | C(84) – C(83) – H(83)     | 118.8        |
| C(82) – C(83) – H(83)     | 118.8        | C(83) – C(84) – C(85)     | 115.9(4)     |
| C(83) – C(84) – C(87)     | 122.7(4)     | C(85) – C(84) – C(87)     | 121.4(4)     |
| C(86) – C(85) – C(84)     | 123.0(4)     | C(86) – C(85) – H(85)     | 118.5        |
| C(84) – C(85) – H(85)     | 118.5        | C(85) – C(86) – C(98)     | 120.3(4)     |
| C(85) – C(86) – H(86)     | 119.8        | C(98) – C(86) – H(86)     | 119.8        |
| C(63) – C(87) – C(64)     | 107.5(4)     | C(63) – C(87) – C(84)     | 112.9(4)     |

Continued on next page

**Table S40.** – continued from previous page

| <b>atom – atom – atom</b> | <b>angle</b> | <b>atom – atom – atom</b> | <b>angle</b> |
|---------------------------|--------------|---------------------------|--------------|
| C(64) – C(87) – C(84)     | 108.9(4)     | C(63) – C(87) – C(76)     | 109.4(4)     |
| C(64) – C(87) – C(76)     | 108.5(5)     | C(84) – C(87) – C(76)     | 109.6(4)     |
| C(74) – C(92) – H(92A)    | 109.5        | C(74) – C(92) – H(92B)    | 109.5        |
| C(74) – C(92) – H(92C)    | 109.5        | C(74) – C(79) – H(79A)    | 109.5        |
| C(74) – C(79) – H(79B)    | 109.5        | C(74) – C(79) – H(79C)    | 109.5        |
| C(74) – C(80) – H(80A)    | 109.5        | C(74) – C(80) – H(80B)    | 109.5        |
| C(74) – C(80) – H(80C)    | 109.5        | C(91) – Pd(91) – P(3)     | 88.4(3)      |
| C(91) – Pd(91) – P(4)     | 82.6(2)      | P(3) – Pd(91) – P(4)      | 146.9(3)     |
| C(91) – Pd(91) – I(3)     | 171.3(3)     | P(3) – Pd(91) – I(3)      | 94.6(2)      |
| P(4) – Pd(91) – I(3)      | 99.1(2)      | C(60) – P(3) – C(82)      | 109.6(2)     |
| C(60) – P(3) – C(48)      | 104.4(2)     | C(82) – P(3) – C(48)      | 105.92(19)   |
| C(60) – P(3) – Pd(91)     | 120.6(2)     | C(82) – P(3) – Pd(91)     | 98.6(3)      |
| C(48) – P(3) – Pd(91)     | 116.6(3)     | C(60) – P(3) – Pd(1)      | 121.16(19)   |
| C(82) – P(3) – Pd(1)      | 103.27(16)   | C(48) – P(3) – Pd(1)      | 111.62(16)   |

5.8 Crystal data for  $[\{\text{PC}(\text{sp}^3)(\text{PMe}_3)\text{P}\}^{\text{tBu}}\text{PdI}][\text{BAR}_4^{\text{F}}]$  (12)

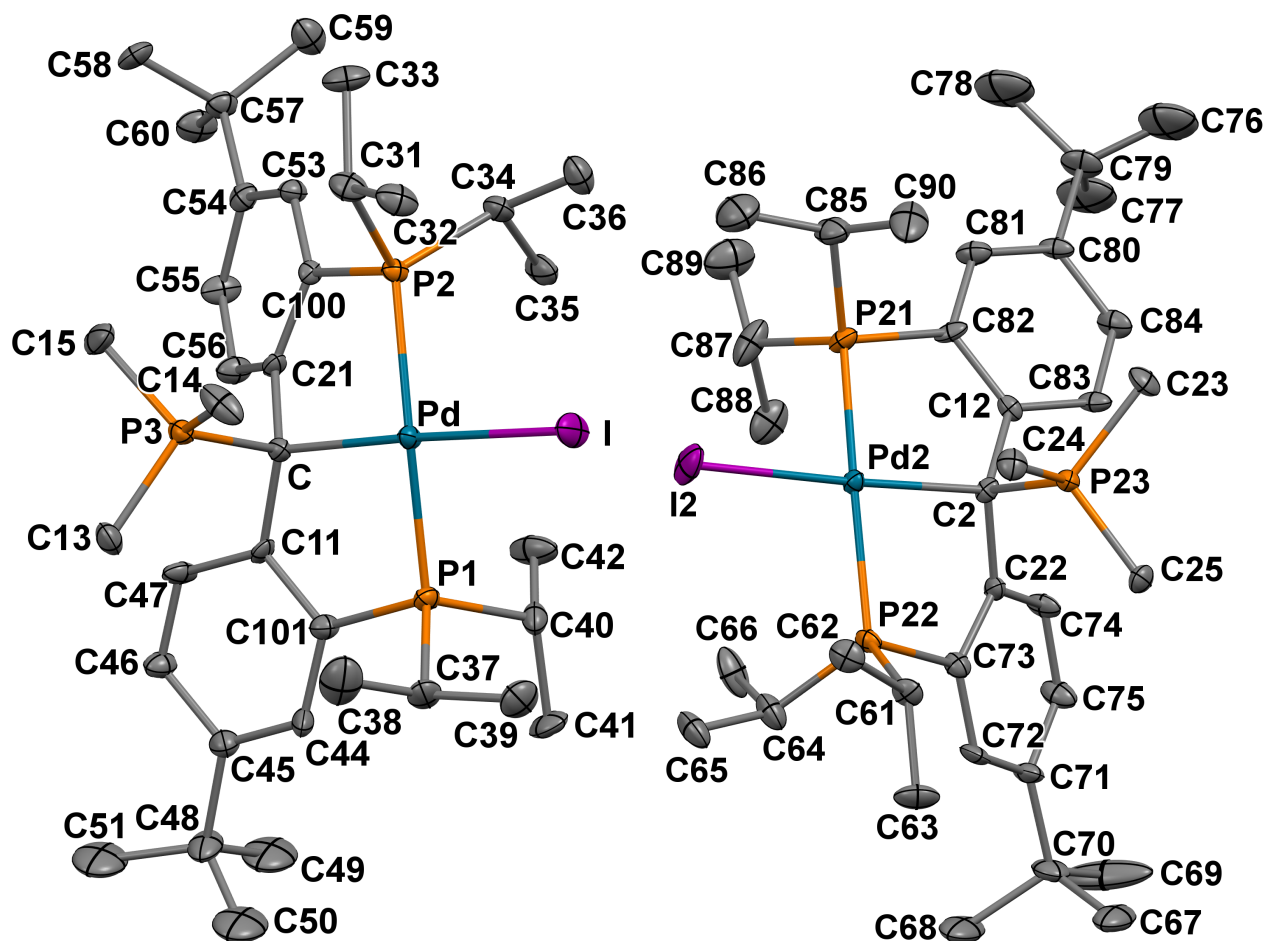

**Figure S51.** Thermal-ellipsoid representation of the two crystallographically independent molecules of  $[\{\text{PC}(\text{sp}^3)(\text{PMe}_3)\text{P}\}^{\text{tBu}}\text{PdI}][\text{BAR}_4^{\text{F}}]$  (12) at 50% probability. Hydrogen atoms and the anions were omitted for clarity.

**Table S41.** Crystal data and structure refinement for  $[\{\text{PC}(\text{sp}^3)(\text{PMe}_3)\text{P}\}^{\text{tBu}}\text{PdI}][\text{BAr}_4^{\text{F}}]$  (**12**).

|                                          |                                                                    |                           |
|------------------------------------------|--------------------------------------------------------------------|---------------------------|
| Identification code:                     | pc29                                                               |                           |
| Empirical formula:                       | $\text{C}_{68}\text{H}_{72}\text{BF}_{24}\text{IP}_3\text{Pd}$     |                           |
| Formula weight:                          | 1682.28                                                            |                           |
| Temperature:                             | 120(2) K                                                           |                           |
| Wavelength:                              | 0.71073 Å                                                          |                           |
| Crystal system:                          | Monoclinic                                                         |                           |
| Space group:                             | $P2_1$                                                             |                           |
| Unit cell dimensions:                    | $a = 10.0901(7)$ Å                                                 | $\alpha = 90^\circ$       |
|                                          | $b = 23.7955(17)$ Å                                                | $\beta = 90.532(2)^\circ$ |
|                                          | $c = 31.205(2)$ Å                                                  | $\gamma = 90^\circ$       |
| Volume:                                  | $7492.0(9)$ Å <sup>3</sup>                                         |                           |
| Z:                                       | 4                                                                  |                           |
| Density (calculated):                    | $1.491$ g·cm <sup>-3</sup>                                         |                           |
| Absorption coefficient ( $\mu$ ):        | $0.822$ mm <sup>-1</sup>                                           |                           |
| F(000):                                  | 3380                                                               |                           |
| Crystal size:                            | $0.12 \times 0.10 \times 0.08$ mm <sup>3</sup>                     |                           |
| $\theta$ range for data collection:      | $0.65$ to $25.00^\circ$                                            |                           |
| Index ranges:                            | $-11 \leq h \leq 11$ , $-26 \leq k \leq 28$ , $-37 \leq l \leq 35$ |                           |
| Reflections collected:                   | 134462                                                             |                           |
| Independent reflections:                 | 25436 [ $R_{\text{int}} = 0.0348$ ]                                |                           |
| Completeness to $\theta = 25.00^\circ$ : | 100.0 %                                                            |                           |
| Absorption correction:                   | Semi-empirical from equivalents                                    |                           |
| Max. and min. transmission:              | 0.9106 and 0.8668                                                  |                           |
| Refinement method:                       | Full-matrix least-squares on $F^2$                                 |                           |
| Data / restraints / parameters:          | 25436 / 1 / 1563                                                   |                           |
| Goodness-of-fit on $F^2$ :               | 1.019                                                              |                           |
| Final R indices [ $I > 2\sigma(I)$ ]:    | $R_1 = 0.0632$ , $wR_2 = 0.1651$                                   |                           |
| R indices (all data):                    | $R_1 = 0.0658$ , $wR_2 = 0.1675$                                   |                           |
| Absolute structure parameter:            | 0.347(17)                                                          |                           |
| Largest diff. peak and hole:             | $2.325$ and $-1.408$ e <sup>-</sup> ·Å <sup>-3</sup>               |                           |

**Table S42.** Atomic coordinates and equivalent isotropic displacement parameters ( $\text{\AA}^2$ ) for  $[(\text{PC}(\text{sp}^3)(\text{PMe}_3)\text{P})^{\text{tBu}}\text{PdI}][\text{BAR}_4^{\text{F}}]$  (**12**).  $U(\text{eq})$  is defined as one third of the trace of the orthogonalized  $U_{ij}$  tensor

| atom   | x           | y           | z           | $U(\text{eq})$ |
|--------|-------------|-------------|-------------|----------------|
| Pd     | 0.50136(5)  | 0.54672(2)  | 0.77405(2)  | 0.017(1)       |
| F(1)   | -0.0776(11) | 0.2811(4)   | 0.2619(2)   | 0.102(3)       |
| B(1)   | 0.0748(8)   | 0.3330(3)   | 0.4526(3)   | 0.018(2)       |
| C      | 0.2946(7)   | 0.5378(3)   | 0.7637(2)   | 0.018(2)       |
| I      | 0.75789(5)  | 0.55439(3)  | 0.78935(2)  | 0.041(1)       |
| F(9)   | 0.3761(5)   | 0.5606(2)   | 0.47363(16) | 0.038(1)       |
| F(8)   | 0.4161(6)   | 0.5079(2)   | 0.42037(16) | 0.043(1)       |
| F(7)   | 0.2233(5)   | 0.5409(2)   | 0.4276(2)   | 0.052(2)       |
| F(6)   | 0.4509(9)   | 0.3632(3)   | 0.3399(2)   | 0.077(2)       |
| F(5)   | 0.3276(9)   | 0.4218(3)   | 0.3065(3)   | 0.090(3)       |
| F(4)   | 0.3733(9)   | 0.3479(3)   | 0.2786(2)   | 0.084(3)       |
| F(3)   | -0.2154(11) | 0.3256(4)   | 0.3026(3)   | 0.110(4)       |
| P(1)   | 0.48522(18) | 0.46738(8)  | 0.81371(6)  | 0.021(1)       |
| F(11)  | 0.4356(9)   | 0.3544(3)   | 0.5823(2)   | 0.077(2)       |
| C(11)  | 0.2366(7)   | 0.4837(3)   | 0.7826(2)   | 0.019(2)       |
| P(2)   | 0.49601(17) | 0.60997(8)  | 0.71715(5)  | 0.018(1)       |
| F(12)  | 0.2630(8)   | 0.3869(4)   | 0.60801(18) | 0.082(3)       |
| C(21)  | 0.2649(6)   | 0.5481(4)   | 0.7161(2)   | 0.020(1)       |
| P(3)   | 0.22002(19) | 0.59646(8)  | 0.79439(6)  | 0.021(1)       |
| F(13)  | 0.4280(8)   | 0.4422(2)   | 0.59633(19) | 0.065(2)       |
| C(13)  | 0.1231(8)   | 0.5735(4)   | 0.8390(3)   | 0.030(2)       |
| F(14)  | 0.0294(6)   | 0.1216(3)   | 0.57180(17) | 0.052(1)       |
| C(14)  | 0.3357(9)   | 0.6430(4)   | 0.8196(3)   | 0.041(2)       |
| C(15)  | 0.1118(10)  | 0.6374(4)   | 0.7614(3)   | 0.042(2)       |
| F(15)  | -0.0096(6)  | 0.2052(3)   | 0.59252(18) | 0.052(1)       |
| C(200) | 0.0386(7)   | 0.2480(3)   | 0.5066(2)   | 0.019(2)       |
| F(16)  | -0.1381(6)  | 0.1662(3)   | 0.54849(18) | 0.052(1)       |
| C(16)  | 0.832(2)    | 0.3769(8)   | 0.1912(5)   | 0.105(1)       |
| C(017) | 0.2063(6)   | 0.2371(3)   | 0.4543(2)   | 0.013(1)       |
| F(17)  | 0.4248(5)   | 0.1282(2)   | 0.47884(15) | 0.039(1)       |
| C(17)  | 0.961(2)    | 0.3891(8)   | 0.1282(5)   | 0.105(1)       |
| C(018) | -0.3405(8)  | 0.3879(3)   | 0.4783(3)   | 0.031(2)       |
| F(18)  | 0.2865(5)   | 0.10304(18) | 0.43066(15) | 0.033(1)       |
| C(18)  | 0.757(2)    | 0.3442(8)   | 0.1214(5)   | 0.105(1)       |
| F(19)  | 0.4076(4)   | 0.17413(19) | 0.41981(14) | 0.027(1)       |
| C(201) | 0.1657(7)   | 0.1619(3)   | 0.5044(2)   | 0.017(1)       |
| C(202) | -0.1860(8)  | 0.3161(3)   | 0.4585(2)   | 0.023(2)       |
| C(203) | -0.0774(7)  | 0.3521(3)   | 0.4634(3)   | 0.022(1)       |
| P(21)  | 0.52338(19) | 0.61029(9)  | 0.20625(6)  | 0.022(1)       |
| F(21)  | -0.4033(8)  | 0.2438(3)   | 0.4749(3)   | 0.098(2)       |
| F(20)  | -0.4237(8)  | 0.2752(3)   | 0.4156(4)   | 0.098(2)       |
| G(21)  | 0.2672(6)   | 0.6395(3)   | 0.2217(2)   | 0.016(1)       |
| P(22)  | 0.50335(18) | 0.69345(8)  | 0.33694(6)  | 0.019(1)       |
| F(22)  | -0.5376(8)  | 0.3137(3)   | 0.4572(4)   | 0.098(2)       |
| C(22)  | 0.2827(7)   | 0.7085(3)   | 0.2869(2)   | 0.019(2)       |
| P(23)  | 0.24672(17) | 0.59392(8)  | 0.30059(6)  | 0.018(1)       |
| C(23)  | 0.1458(8)   | 0.5454(4)   | 0.2700(3)   | 0.029(2)       |
| C(24)  | 0.3670(7)   | 0.5498(4)   | 0.3254(3)   | 0.028(2)       |

Continued on next page

**Table S42.** – continued from previous page

| atom   | x           | y          | x          | U(eq)    |
|--------|-------------|------------|------------|----------|
| F(24)  | -0.1708(10) | 0.5170(3)  | 0.4935(4)  | 0.104(2) |
| C(25)  | 0.1428(7)   | 0.6209(4)  | 0.3409(2)  | 0.024(2) |
| F(25)  | -0.3654(10) | 0.5056(3)  | 0.4810(4)  | 0.104(2) |
| C(27)  | 0.3375(7)   | 0.4596(3)  | 0.5150(2)  | 0.022(2) |
| F(27)  | 1.1441(6)   | 0.1708(2)  | 0.0198(3)  | 0.067(2) |
| C(26)  | 0.2065(7)   | 0.4292(3)  | 0.4554(2)  | 0.021(2) |
| F(26)  | -0.3219(10) | 0.4808(3)  | 0.5375(4)  | 0.104(2) |
| C(204) | -0.3123(8)  | 0.3325(3)  | 0.4652(3)  | 0.027(2) |
| F(28)  | 1.3481(7)   | 0.1863(3)  | 0.0227(4)  | 0.100(3) |
| C(28)  | 0.2281(8)   | 0.3694(3)  | 0.5165(2)  | 0.023(2) |
| Pd(2)  | 0.52536(5)  | 0.63981(2) | 0.27521(2) | 0.016(1) |
| F(2)   | -0.1595(9)  | 0.2409(3)  | 0.3169(2)  | 0.087(3) |
| B(2)   | 0.8942(8)   | 0.3584(4)  | 0.0495(3)  | 0.019(2) |
| C(2)   | 0.3172(6)   | 0.6507(3)  | 0.2671(2)  | 0.016(1) |
| I(2)   | 0.78300(5)  | 0.62284(3) | 0.28297(2) | 0.044(1) |
| F(29)  | 1.2309(10)  | 0.2022(3)  | -0.0368(3) | 0.087(3) |
| C(205) | -0.2376(7)  | 0.4234(3)  | 0.4851(3)  | 0.022(1) |
| C(206) | -0.1058(8)  | 0.4064(3)  | 0.4772(3)  | 0.022(1) |
| F(30)  | 0.7813(7)   | 0.1472(3)  | 0.0741(3)  | 0.072(2) |
| C(31)  | 0.4976(9)   | 0.6873(4)  | 0.7244(3)  | 0.032(2) |
| F(31)  | 0.5848(8)   | 0.1695(3)  | 0.0844(2)  | 0.071(2) |
| C(32)  | 0.6050(9)   | 0.7067(4)  | 0.7539(3)  | 0.036(2) |
| F(32)  | 0.6340(8)   | 0.1230(3)  | 0.0288(2)  | 0.069(2) |
| C(33)  | 0.4955(10)  | 0.7214(4)  | 0.6823(3)  | 0.041(2) |
| F(33)  | 0.5730(6)   | 0.5219(2)  | 0.0738(2)  | 0.053(2) |
| C(34)  | 0.6078(8)   | 0.5957(3)  | 0.6726(2)  | 0.027(2) |
| F(34)  | 0.6506(9)   | 0.5912(3)  | 0.0404(3)  | 0.089(3) |
| C(207) | 0.2134(9)   | 0.3460(3)  | 0.3802(2)  | 0.027(1) |
| F(36)  | 0.9516(10)  | 0.5555(5)  | -0.0813(3) | 0.105(1) |
| C(36)  | 0.7487(8)   | 0.6191(4)  | 0.6771(3)  | 0.037(2) |
| C(35)  | 0.6111(9)   | 0.5329(4)  | 0.6622(3)  | 0.035(2) |
| F(35)  | 0.5142(7)   | 0.5330(4)  | 0.0099(2)  | 0.080(2) |
| C(37)  | 0.5154(8)   | 0.4619(4)  | 0.8717(2)  | 0.033(2) |
| F(37)  | 1.1182(11)  | 0.5200(5)  | -0.0513(3) | 0.105(1) |
| C(38)  | 0.4463(12)  | 0.5074(6)  | 0.8950(3)  | 0.059(3) |
| F(38)  | 0.9979(9)   | 0.4762(4)  | -0.0947(2) | 0.088(3) |
| C(39)  | 0.6639(9)   | 0.4630(5)  | 0.8836(3)  | 0.043(2) |
| F(39)  | 1.5006(9)   | 0.3742(5)  | 0.0627(5)  | 0.154(3) |
| C(208) | 0.867(2)    | 0.3634(8)  | 0.1018(5)  | 0.105(1) |
| C(209) | -0.4205(16) | 0.2935(7)  | 0.4584(7)  | 0.098(2) |
| C(210) | 0.738(2)    | 0.3500(8)  | 0.1652(5)  | 0.105(1) |
| C(211) | 1.0461(9)   | 0.3366(3)  | 0.0413(3)  | 0.030(2) |
| C(40)  | 0.5805(8)   | 0.4115(3)  | 0.7875(3)  | 0.030(2) |
| F(40)  | 1.3669(9)   | 0.4345(5)  | 0.0766(5)  | 0.154(3) |
| C(212) | 1.2099(9)   | 0.2647(4)  | 0.0228(4)  | 0.045(2) |
| C(42)  | 0.5471(12)  | 0.4099(4)  | 0.7410(3)  | 0.050(3) |
| C(41)  | 0.5634(10)  | 0.3520(4)  | 0.8074(3)  | 0.039(2) |
| F(41)  | 1.4281(10)  | 0.4167(5)  | 0.0159(6)  | 0.154(3) |
| C(44)  | 0.2564(8)   | 0.4017(3)  | 0.8283(3)  | 0.030(2) |
| F(44)  | 1.1573(12)  | 0.3929(5)  | 0.2003(3)  | 0.105(1) |
| F(43)  | 1.0954(11)  | 0.4664(4)  | 0.1839(3)  | 0.105(1) |

Continued on next page

**Table S42.** – continued from previous page

| atom   | x           | y         | x          | U(eq)    |
|--------|-------------|-----------|------------|----------|
| C(45)  | 0.1263(8)   | 0.3882(3) | 0.8243(3)  | 0.027(2) |
| F(45)  | 1.0249(11)  | 0.4270(4) | 0.2382(3)  | 0.105(1) |
| C(46)  | 0.0466(8)   | 0.4254(3) | 0.7991(2)  | 0.027(2) |
| F(46)  | 0.5749(11)  | 0.2767(4) | 0.1677(3)  | 0.105(1) |
| C(213) | -0.0126(9)  | 0.3114(3) | 0.3738(2)  | 0.027(1) |
| C(47)  | 0.1018(8)   | 0.4711(4) | 0.7795(2)  | 0.027(2) |
| F(47)  | 0.5149(12)  | 0.3454(4) | 0.1693(3)  | 0.105(1) |
| C(48)  | 0.0682(9)   | 0.3361(4) | 0.8455(4)  | 0.046(3) |
| C(49)  | 0.0997(14)  | 0.2861(5) | 0.8136(5)  | 0.074(2) |
| C(214) | 1.2851(10)  | 0.3543(5) | 0.0424(5)  | 0.060(4) |
| C(50)  | 0.1361(14)  | 0.3224(5) | 0.8884(5)  | 0.074(2) |
| C(51)  | -0.0818(13) | 0.3399(5) | 0.8492(5)  | 0.074(2) |
| C(53)  | 0.2997(7)   | 0.6063(3) | 0.6531(2)  | 0.021(2) |
| C(54)  | 0.1922(7)   | 0.5816(3) | 0.6317(2)  | 0.022(2) |
| C(56)  | 0.1668(8)   | 0.5209(4) | 0.6928(2)  | 0.027(2) |
| C(55)  | 0.1335(8)   | 0.5361(3) | 0.6517(2)  | 0.028(2) |
| C(57)  | 0.1495(7)   | 0.6036(3) | 0.5877(2)  | 0.025(2) |
| C(58)  | 0.0731(8)   | 0.6579(3) | 0.5949(3)  | 0.030(2) |
| C(59)  | 0.2693(8)   | 0.6152(5) | 0.5597(2)  | 0.036(2) |
| C(215) | 0.1215(13)  | 0.3252(4) | 0.3104(3)  | 0.051(3) |
| C(60)  | 0.0619(9)   | 0.5619(4) | 0.5638(3)  | 0.036(2) |
| C(61)  | 0.4898(8)   | 0.6631(4) | 0.3914(2)  | 0.025(2) |
| C(62)  | 0.6069(8)   | 0.6228(3) | 0.4005(2)  | 0.029(2) |
| C(63)  | 0.4713(10)  | 0.7037(4) | 0.4280(3)  | 0.039(2) |
| F(63)  | 0.4648(10)  | 0.2659(5) | -0.0743(3) | 0.111(2) |
| C(64)  | 0.6145(8)   | 0.7544(4) | 0.3406(3)  | 0.036(2) |
| F(64)  | 0.6528(10)  | 0.2708(5) | -0.1024(3) | 0.111(2) |
| C(65)  | 0.7458(9)   | 0.7445(4) | 0.3627(3)  | 0.040(2) |
| F(65)  | 0.5581(10)  | 0.3404(5) | -0.0777(3) | 0.111(2) |
| C(66)  | 0.6345(10)  | 0.7807(4) | 0.2968(3)  | 0.047(3) |
| C(67)  | 0.0878(12)  | 0.8368(4) | 0.3987(4)  | 0.057(3) |
| C(68)  | 0.2656(13)  | 0.8945(5) | 0.3684(4)  | 0.064(4) |
| C(69)  | 0.038(2)    | 0.8879(7) | 0.3328(5)  | 0.123(9) |
| C(70)  | 0.1482(9)   | 0.8578(4) | 0.3544(3)  | 0.038(2) |
| C(71)  | 0.1985(8)   | 0.8067(3) | 0.3310(2)  | 0.026(2) |
| C(72)  | 0.3033(8)   | 0.7746(3) | 0.3451(3)  | 0.027(2) |
| C(73)  | 0.3456(7)   | 0.7274(3) | 0.3236(2)  | 0.021(2) |
| C(74)  | 0.1825(8)   | 0.7427(3) | 0.2704(2)  | 0.025(2) |
| C(75)  | 0.1423(8)   | 0.7913(3) | 0.2905(3)  | 0.031(2) |
| C(76)  | 0.0206(15)  | 0.5515(7) | 0.0967(4)  | 0.080(2) |
| C(77)  | 0.0729(15)  | 0.6509(7) | 0.0723(4)  | 0.080(2) |
| C(78)  | 0.2342(15)  | 0.5747(7) | 0.0642(4)  | 0.080(2) |
| C(79)  | 0.1211(9)   | 0.5972(4) | 0.0930(2)  | 0.036(2) |
| C(80)  | 0.1731(8)   | 0.6109(3) | 0.1382(2)  | 0.023(2) |
| C(81)  | 0.3045(8)   | 0.6046(3) | 0.1493(2)  | 0.027(2) |
| C(82)  | 0.3515(7)   | 0.6184(3) | 0.1907(2)  | 0.022(2) |
| C(83)  | 0.1331(7)   | 0.6447(3) | 0.2105(2)  | 0.024(2) |
| C(84)  | 0.0908(8)   | 0.6314(3) | 0.1695(2)  | 0.028(2) |
| C(85)  | 0.5709(9)   | 0.5399(4) | 0.1891(3)  | 0.038(2) |
| C(86)  | 0.7175(12)  | 0.5291(5) | 0.1892(4)  | 0.062(3) |
| C(87)  | 0.6152(10)  | 0.6613(4) | 0.1733(3)  | 0.044(2) |

Continued on next page



**Table S42.** – continued from previous page

| atom   | x           | y          | x          | U(eq)    |
|--------|-------------|------------|------------|----------|
| C(88)  | 0.5588(10)  | 0.7188(4)  | 0.1804(3)  | 0.044(2) |
| C(89)  | 0.6301(13)  | 0.6512(5)  | 0.1277(3)  | 0.061(3) |
| C(90)  | 0.4949(11)  | 0.4959(4)  | 0.2135(5)  | 0.059(3) |
| C(91)  | 0.8134(9)   | 0.5233(4)  | -0.0126(3) | 0.031(2) |
| C(92)  | 0.9381(7)   | 0.4398(3)  | -0.0073(2) | 0.022(2) |
| C(93)  | 0.7649(7)   | 0.4547(3)  | 0.0403(2)  | 0.019(2) |
| C(94)  | 1.0788(8)   | 0.2824(4)  | 0.0287(3)  | 0.035(2) |
| C(95)  | 1.3162(10)  | 0.3024(5)  | 0.0304(5)  | 0.058(3) |
| C(96)  | 1.1528(8)   | 0.3730(4)  | 0.0467(4)  | 0.046(3) |
| C(97)  | 0.7741(7)   | 0.2587(3)  | 0.0473(2)  | 0.019(2) |
| C(98)  | 0.6291(8)   | 0.2265(4)  | -0.0087(3) | 0.031(2) |
| C(99)  | 0.7276(8)   | 0.3194(3)  | -0.0095(2) | 0.026(2) |
| C(100) | 0.3380(6)   | 0.5894(3)  | 0.6936(2)  | 0.015(1) |
| C(101) | 0.3140(7)   | 0.4482(3)  | 0.8073(2)  | 0.022(2) |
| C(102) | 0.1761(6)   | 0.3785(3)  | 0.4751(2)  | 0.015(1) |
| C(103) | 0.2875(7)   | 0.4689(3)  | 0.4750(2)  | 0.020(2) |
| C(104) | 0.3218(8)   | 0.5200(3)  | 0.4503(3)  | 0.029(2) |
| C(105) | 0.3054(8)   | 0.4118(3)  | 0.5361(2)  | 0.024(2) |
| C(106) | 0.3596(11)  | 0.3991(4)  | 0.5797(3)  | 0.045(3) |
| C(107) | 0.0073(12)  | 0.3083(4)  | 0.3290(3)  | 0.046(3) |
| C(108) | -0.1090(18) | 0.2893(7)  | 0.3035(4)  | 0.082(5) |
| C(109) | 0.0953(9)   | 0.3296(3)  | 0.4004(2)  | 0.027(1) |
| C(110) | 0.2254(11)  | 0.3443(4)  | 0.3360(3)  | 0.041(2) |
| C(111) | 0.3432(14)  | 0.3678(5)  | 0.3161(4)  | 0.056(3) |
| C(112) | 0.2347(6)   | 0.1840(3)  | 0.4699(2)  | 0.012(1) |
| C(113) | 0.3388(6)   | 0.1486(3)  | 0.4500(2)  | 0.019(1) |
| C(114) | -0.0091(11) | 0.1716(5)  | 0.5579(3)  | 0.052(1) |
| C(115) | 0.0676(7)   | 0.1946(3)  | 0.5224(2)  | 0.018(2) |
| C(117) | 0.1071(6)   | 0.2700(3)  | 0.4720(2)  | 0.014(1) |
| C(118) | 0.7378(8)   | 0.5051(3)  | 0.0208(2)  | 0.023(2) |
| C(120) | 0.8691(7)   | 0.4193(3)  | 0.0276(2)  | 0.019(2) |
| C(121) | 0.9148(8)   | 0.4906(4)  | -0.0267(2) | 0.027(2) |
| C(122) | 0.997(2)    | 0.5093(9)  | -0.0627(5) | 0.105(1) |
| C(123) | 0.6760(10)  | 0.1628(4)  | 0.0527(3)  | 0.041(2) |
| C(124) | 0.6948(8)   | 0.2181(3)  | 0.0293(2)  | 0.024(2) |
| C(125) | 0.6462(9)   | 0.2781(4)  | -0.0279(3) | 0.033(2) |
| C(126) | 0.581(2)    | 0.2870(10) | -0.0684(5) | 0.111(2) |
| C(127) | 0.7930(7)   | 0.3116(3)  | 0.0282(2)  | 0.016(1) |
| C(128) | 0.6207(11)  | 0.5385(4)  | 0.0360(3)  | 0.044(3) |
| C(129) | -0.2574(19) | 0.4806(6)  | 0.5011(7)  | 0.104(2) |
| C(150) | 0.622(2)    | 0.3248(9)  | 0.1867(5)  | 0.105(1) |
| C(151) | 1.035(2)    | 0.4275(9)  | 0.1984(5)  | 0.105(1) |
| C(152) | 0.940(2)    | 0.3960(8)  | 0.1711(5)  | 0.105(1) |
| C(153) | 1.3902(19)  | 0.3923(10) | 0.0488(11) | 0.154(3) |
| C(154) | 1.2389(9)   | 0.2052(4)  | 0.0065(4)  | 0.045(2) |
| F(250) | 0.5997(11)  | 0.3464(5)  | 0.2233(3)  | 0.105(1) |
| H(13A) | 0.1113      | 0.6048     | 0.8590     | 0.045    |
| H(13B) | 0.1688      | 0.5425     | 0.8536     | 0.045    |
| H(13C) | 0.0362      | 0.5606     | 0.8287     | 0.045    |
| H(14A) | 0.4030      | 0.6543     | 0.7988     | 0.061    |
| H(14B) | 0.3786      | 0.6238     | 0.8438     | 0.061    |

Continued on next page

**Table S42.** – continued from previous page

| atom   | x       | y      | z      | U(eq) |
|--------|---------|--------|--------|-------|
| H(14C) | 0.2890  | 0.6764 | 0.8299 | 0.061 |
| H(15A) | 0.1625  | 0.6544 | 0.7381 | 0.063 |
| H(15B) | 0.0712  | 0.6670 | 0.7787 | 0.063 |
| H(15C) | 0.0424  | 0.6132 | 0.7493 | 0.063 |
| H(200) | -0.0291 | 0.2696 | 0.5196 | 0.022 |
| H(16)  | 0.8207  | 0.3814 | 0.2212 | 0.125 |
| H(017) | 0.2557  | 0.2514 | 0.4309 | 0.015 |
| H(17)  | 1.0412  | 0.4022 | 0.1161 | 0.125 |
| H(018) | -0.4293 | 0.4000 | 0.4822 | 0.037 |
| H(18)  | 0.6900  | 0.3262 | 0.1046 | 0.125 |
| H(201) | 0.1853  | 0.1255 | 0.5153 | 0.021 |
| H(202) | -0.1703 | 0.2783 | 0.4500 | 0.027 |
| H(23A) | 0.0571  | 0.5613 | 0.2657 | 0.044 |
| H(23B) | 0.1389  | 0.5097 | 0.2855 | 0.044 |
| H(23C) | 0.1866  | 0.5387 | 0.2421 | 0.044 |
| H(24A) | 0.3227  | 0.5233 | 0.3446 | 0.042 |
| H(24B) | 0.4295  | 0.5728 | 0.3420 | 0.042 |
| H(24C) | 0.4151  | 0.5290 | 0.3034 | 0.042 |
| H(25A) | 0.0812  | 0.6482 | 0.3283 | 0.037 |
| H(25B) | 0.1970  | 0.6393 | 0.3630 | 0.037 |
| H(25C) | 0.0926  | 0.5900 | 0.3538 | 0.037 |
| H(27)  | 0.3945  | 0.4865 | 0.5281 | 0.027 |
| H(26)  | 0.1708  | 0.4369 | 0.4278 | 0.025 |
| H(28)  | 0.2115  | 0.3352 | 0.5310 | 0.028 |
| H(206) | -0.0355 | 0.4325 | 0.4813 | 0.027 |
| H(31)  | 0.4128  | 0.6966 | 0.7392 | 0.038 |
| H(32A) | 0.6912  | 0.7001 | 0.7406 | 0.054 |
| H(32B) | 0.6003  | 0.6858 | 0.7809 | 0.054 |
| H(32C) | 0.5942  | 0.7469 | 0.7595 | 0.054 |
| H(33A) | 0.4202  | 0.7094 | 0.6645 | 0.061 |
| H(33B) | 0.5782  | 0.7151 | 0.6668 | 0.061 |
| H(33C) | 0.4867  | 0.7615 | 0.6890 | 0.061 |
| H(34)  | 0.5678  | 0.6146 | 0.6469 | 0.032 |
| H(207) | 0.2863  | 0.3585 | 0.3972 | 0.033 |
| H(36A) | 0.7929  | 0.6175 | 0.6493 | 0.056 |
| H(36B) | 0.7985  | 0.5965 | 0.6981 | 0.056 |
| H(36C) | 0.7447  | 0.6582 | 0.6869 | 0.056 |
| H(35A) | 0.5209  | 0.5177 | 0.6630 | 0.052 |
| H(35B) | 0.6666  | 0.5134 | 0.6834 | 0.052 |
| H(35C) | 0.6480  | 0.5274 | 0.6336 | 0.052 |
| H(37)  | 0.4782  | 0.4252 | 0.8816 | 0.039 |
| H(38A) | 0.4933  | 0.5430 | 0.8906 | 0.089 |
| H(38B) | 0.4446  | 0.4986 | 0.9256 | 0.089 |
| H(38C) | 0.3553  | 0.5108 | 0.8840 | 0.089 |
| H(39A) | 0.7110  | 0.4349 | 0.8665 | 0.064 |
| H(39B) | 0.6752  | 0.4543 | 0.9141 | 0.064 |
| H(39C) | 0.7001  | 0.5004 | 0.8777 | 0.064 |
| H(40)  | 0.6764  | 0.4216 | 0.7902 | 0.037 |
| H(42A) | 0.5201  | 0.3757 | 0.7280 | 0.060 |
| H(42B) | 0.5528  | 0.4432 | 0.7243 | 0.060 |
| H(41A) | 0.4748  | 0.3376 | 0.8005 | 0.058 |

Continued on next page

**Table S42.** – continued from previous page

| atom   | x       | y      | x      | U(eq) |
|--------|---------|--------|--------|-------|
| H(41B) | 0.5742  | 0.3543 | 0.8386 | 0.058 |
| H(41C) | 0.6304  | 0.3266 | 0.7958 | 0.058 |
| H(44)  | 0.3114  | 0.3790 | 0.8461 | 0.037 |
| H(46)  | -0.0456 | 0.4183 | 0.7958 | 0.032 |
| H(213) | -0.0955 | 0.3016 | 0.3859 | 0.033 |
| H(47)  | 0.0460  | 0.4953 | 0.7632 | 0.033 |
| H(49A) | 0.0309  | 0.2572 | 0.8159 | 0.111 |
| H(49B) | 0.1861  | 0.2697 | 0.8210 | 0.111 |
| H(49C) | 0.1017  | 0.3004 | 0.7842 | 0.111 |
| H(50A) | 0.2282  | 0.3114 | 0.8834 | 0.111 |
| H(50B) | 0.0890  | 0.2915 | 0.9023 | 0.111 |
| H(50C) | 0.1343  | 0.3557 | 0.9069 | 0.111 |
| H(51A) | -0.1071 | 0.3787 | 0.8559 | 0.111 |
| H(51B) | -0.1118 | 0.3149 | 0.8721 | 0.111 |
| H(51C) | -0.1231 | 0.3286 | 0.8220 | 0.111 |
| H(53)  | 0.3476  | 0.6355 | 0.6393 | 0.026 |
| H(56)  | 0.1209  | 0.4905 | 0.7058 | 0.033 |
| H(55)  | 0.0686  | 0.5149 | 0.6365 | 0.034 |
| H(58A) | 0.0381  | 0.6717 | 0.5674 | 0.045 |
| H(58B) | 0.1324  | 0.6862 | 0.6074 | 0.045 |
| H(58C) | -0.0005 | 0.6509 | 0.6144 | 0.045 |
| H(59A) | 0.2394  | 0.6236 | 0.5304 | 0.055 |
| H(59B) | 0.3271  | 0.5821 | 0.5595 | 0.055 |
| H(59C) | 0.3184  | 0.6475 | 0.5712 | 0.055 |
| H(215) | 0.1303  | 0.3239 | 0.2802 | 0.061 |
| H(60A) | 0.0463  | 0.5753 | 0.5345 | 0.054 |
| H(60B) | -0.0230 | 0.5583 | 0.5785 | 0.054 |
| H(60C) | 0.1059  | 0.5252 | 0.5629 | 0.054 |
| H(61)  | 0.4085  | 0.6391 | 0.3908 | 0.030 |
| H(62A) | 0.6217  | 0.5989 | 0.3755 | 0.044 |
| H(62B) | 0.5863  | 0.5993 | 0.4253 | 0.044 |
| H(62C) | 0.6871  | 0.6448 | 0.4066 | 0.044 |
| H(63A) | 0.5527  | 0.7255 | 0.4323 | 0.058 |
| H(63B) | 0.4513  | 0.6827 | 0.4542 | 0.058 |
| H(63C) | 0.3977  | 0.7293 | 0.4213 | 0.058 |
| H(64)  | 0.5671  | 0.7832 | 0.3581 | 0.043 |
| H(65A) | 0.7947  | 0.7152 | 0.3475 | 0.060 |
| H(65B) | 0.7307  | 0.7325 | 0.3923 | 0.060 |
| H(65C) | 0.7975  | 0.7794 | 0.3627 | 0.060 |
| H(66A) | 0.6946  | 0.7572 | 0.2800 | 0.071 |
| H(66B) | 0.6729  | 0.8183 | 0.3002 | 0.071 |
| H(66C) | 0.5490  | 0.7836 | 0.2818 | 0.071 |
| H(67A) | 0.0091  | 0.8137 | 0.3930 | 0.085 |
| H(67B) | 0.0630  | 0.8694 | 0.4161 | 0.085 |
| H(67C) | 0.1541  | 0.8144 | 0.4142 | 0.085 |
| H(68A) | 0.3069  | 0.9111 | 0.3431 | 0.096 |
| H(68B) | 0.3307  | 0.8713 | 0.3838 | 0.096 |
| H(68C) | 0.2343  | 0.9245 | 0.3873 | 0.096 |
| H(69A) | 0.0743  | 0.9148 | 0.3122 | 0.185 |
| H(69B) | -0.0139 | 0.9082 | 0.3542 | 0.185 |
| H(69C) | -0.0187 | 0.8608 | 0.3178 | 0.185 |

Continued on next page

**Table S42.** – continued from previous page

| atom   | x       | y      | x       | U(eq) |
|--------|---------|--------|---------|-------|
| H(72)  | 0.3482  | 0.7853 | 0.3708  | 0.033 |
| H(74)  | 0.1402  | 0.7321 | 0.2442  | 0.030 |
| H(75)  | 0.0772  | 0.8147 | 0.2774  | 0.037 |
| H(76A) | -0.0643 | 0.5676 | 0.1056  | 0.120 |
| H(76B) | 0.0506  | 0.5240 | 0.1181  | 0.120 |
| H(76C) | 0.0093  | 0.5329 | 0.0689  | 0.120 |
| H(77A) | 0.0546  | 0.6442 | 0.0418  | 0.120 |
| H(77B) | 0.1412  | 0.6800 | 0.0753  | 0.120 |
| H(77C) | -0.0083 | 0.6635 | 0.0864  | 0.120 |
| H(78A) | 0.2013  | 0.5706 | 0.0347  | 0.120 |
| H(78B) | 0.2640  | 0.5381 | 0.0750  | 0.120 |
| H(78C) | 0.3085  | 0.6012 | 0.0648  | 0.120 |
| H(81)  | 0.3648  | 0.5906 | 0.1286  | 0.033 |
| H(83)  | 0.0712  | 0.6573 | 0.2311  | 0.029 |
| H(84)  | -0.0002 | 0.6367 | 0.1626  | 0.033 |
| H(85)  | 0.5412  | 0.5365 | 0.1585  | 0.045 |
| H(86A) | 0.7376  | 0.4987 | 0.1691  | 0.093 |
| H(86B) | 0.7465  | 0.5183 | 0.2181  | 0.093 |
| H(86C) | 0.7641  | 0.5634 | 0.1805  | 0.093 |
| H(87)  | 0.7072  | 0.6623 | 0.1855  | 0.053 |
| H(88A) | 0.5387  | 0.7423 | 0.1566  | 0.053 |
| H(88B) | 0.5432  | 0.7317 | 0.2087  | 0.053 |
| H(89A) | 0.5434  | 0.6541 | 0.1135  | 0.091 |
| H(89B) | 0.6664  | 0.6134 | 0.1233  | 0.091 |
| H(89C) | 0.6905  | 0.6791 | 0.1157  | 0.091 |
| H(90A) | 0.5254  | 0.4954 | 0.2434  | 0.071 |
| H(90B) | 0.5099  | 0.4589 | 0.2006  | 0.071 |
| H(90C) | 0.4001  | 0.5048 | 0.2124  | 0.071 |
| H(91)  | 0.7953  | 0.5584 | -0.0258 | 0.037 |
| H(92)  | 1.0065  | 0.4170 | -0.0187 | 0.026 |
| H(93)  | 0.7108  | 0.4432 | 0.0634  | 0.023 |
| H(94)  | 1.0093  | 0.2562 | 0.0238  | 0.042 |
| H(95)  | 1.4058  | 0.2912 | 0.0270  | 0.070 |
| H(96)  | 1.1364  | 0.4113 | 0.0535  | 0.056 |
| H(97)  | 0.8178  | 0.2508 | 0.0737  | 0.023 |
| H(98)  | 0.5746  | 0.1982 | -0.0212 | 0.037 |
| H(99)  | 0.7375  | 0.3542 | -0.0240 | 0.031 |

**Table S43.** Anisotropic displacement parameters ( $\text{\AA}^2$ ) for  $[\{\text{PC}(\text{sp}^3)(\text{PMe}_3)\text{P}\}^t\text{BuPdII}][\text{BAF}_4^-]$  (**12**). The anisotropic displacement factor exponent takes the form:  $-2\pi^2[\text{h}^2\text{a}^*2\text{U}_{11} + \dots + 2\text{hka}^*\text{b}^*\text{U}_{12}]$ .

| atom   | $U_{11}$   | $U_{22}$   | $U_{33}$   | $U_{23}$    | $U_{13}$    | $U_{12}$    |
|--------|------------|------------|------------|-------------|-------------|-------------|
| Pd     | 0.0131(2)  | 0.0211(3)  | 0.0164(2)  | 0.0030(2)   | -0.0022(2)  | -0.0029(2)  |
| F(1)   | 0.196(10)  | 0.087(6)   | 0.022(3)   | -0.006(3)   | -0.022(4)   | -0.032(6)   |
| B(1)   | 0.021(4)   | 0.010(4)   | 0.023(4)   | -0.002(3)   | 0.004(3)    | 0.004(3)    |
| C      | 0.019(3)   | 0.018(4)   | 0.017(3)   | 0.002(3)    | 0.003(3)    | 0.002(3)    |
| I      | 0.0160(2)  | 0.0592(4)  | 0.0480(3)  | 0.0197(3)   | -0.0090(2)  | -0.0083(2)  |
| F(9)   | 0.060(3)   | 0.018(3)   | 0.037(3)   | -0.003(2)   | 0.001(2)    | -0.021(2)   |
| F(8)   | 0.060(3)   | 0.037(3)   | 0.031(3)   | 0.002(2)    | 0.016(2)    | -0.011(3)   |
| F(7)   | 0.048(3)   | 0.034(3)   | 0.073(4)   | 0.031(3)    | -0.022(3)   | -0.011(3)   |
| F(6)   | 0.092(6)   | 0.070(5)   | 0.070(5)   | 0.000(4)    | 0.049(4)    | -0.012(4)   |
| F(5)   | 0.112(6)   | 0.033(4)   | 0.127(7)   | 0.025(4)    | 0.075(5)    | 0.006(4)    |
| F(4)   | 0.119(6)   | 0.090(5)   | 0.044(4)   | 0.006(4)    | 0.053(4)    | 0.037(5)    |
| F(3)   | 0.128(8)   | 0.087(6)   | 0.114(7)   | -0.043(5)   | -0.078(6)   | 0.017(6)    |
| P(1)   | 0.0177(9)  | 0.0252(10) | 0.0201(9)  | 0.0070(8)   | -0.0029(7)  | 0.0003(7)   |
| F(11)  | 0.127(7)   | 0.035(4)   | 0.068(4)   | 0.014(3)    | -0.061(4)   | 0.013(4)    |
| C(11)  | 0.018(3)   | 0.022(4)   | 0.016(3)   | 0.004(3)    | -0.006(3)   | 0.007(3)    |
| P(2)   | 0.0165(8)  | 0.0192(10) | 0.0175(8)  | 0.0022(7)   | -0.0025(6)  | -0.0046(7)  |
| F(12)  | 0.100(6)   | 0.123(7)   | 0.023(3)   | 0.012(3)    | -0.011(3)   | -0.045(5)   |
| C(21)  | 0.019(3)   | 0.024(4)   | 0.016(3)   | 0.005(3)    | -0.001(2)   | 0.007(3)    |
| P(3)   | 0.0242(9)  | 0.0190(10) | 0.0209(9)  | 0.0013(7)   | 0.0065(7)   | 0.0005(7)   |
| F(13)  | 0.112(6)   | 0.032(3)   | 0.049(3)   | 0.001(3)    | -0.048(4)   | -0.022(3)   |
| C(13)  | 0.021(4)   | 0.043(5)   | 0.026(4)   | 0.002(3)    | 0.007(3)    | 0.000(3)    |
| F(14)  | 0.0538(18) | 0.062(2)   | 0.0403(16) | 0.0206(15)  | 0.0208(14)  | -0.0055(16) |
| C(14)  | 0.052(5)   | 0.033(5)   | 0.038(5)   | -0.019(4)   | 0.021(4)    | -0.022(4)   |
| C(15)  | 0.050(5)   | 0.041(6)   | 0.035(5)   | 0.012(4)    | 0.014(4)    | 0.029(5)    |
| F(15)  | 0.0538(18) | 0.062(2)   | 0.0403(16) | 0.0206(15)  | 0.0208(14)  | -0.0055(16) |
| C(200) | 0.014(3)   | 0.022(4)   | 0.020(3)   | 0.002(3)    | 0.005(3)    | 0.005(3)    |
| F(16)  | 0.0538(18) | 0.062(2)   | 0.0403(16) | 0.0206(15)  | 0.0208(14)  | -0.0055(16) |
| C(16)  | 0.140(3)   | 0.113(2)   | 0.0607(15) | 0.0074(15)  | 0.0041(16)  | -0.041(2)   |
| C(017) | 0.015(3)   | 0.011(3)   | 0.013(3)   | 0.007(2)    | 0.001(2)    | -0.004(3)   |
| F(17)  | 0.034(3)   | 0.052(4)   | 0.031(2)   | 0.002(2)    | 0.0011(19)  | 0.028(2)    |
| C(17)  | 0.140(3)   | 0.113(2)   | 0.0607(15) | 0.0074(15)  | 0.0041(16)  | -0.041(2)   |
| C(018) | 0.019(4)   | 0.020(4)   | 0.053(5)   | -0.009(4)   | -0.009(3)   | 0.006(3)    |
| F(18)  | 0.044(3)   | 0.011(2)   | 0.044(3)   | -0.0129(19) | 0.013(2)    | -0.0059(19) |
| C(18)  | 0.140(3)   | 0.113(2)   | 0.0607(15) | 0.0074(15)  | 0.0041(16)  | -0.041(2)   |
| F(19)  | 0.027(2)   | 0.027(3)   | 0.027(2)   | -0.0057(19) | 0.0140(18)  | -0.0020(19) |
| C(201) | 0.022(3)   | 0.013(4)   | 0.016(3)   | 0.003(3)    | 0.000(3)    | -0.002(3)   |
| C(202) | 0.031(4)   | 0.010(4)   | 0.027(4)   | -0.004(3)   | -0.014(3)   | 0.007(3)    |
| C(203) | 0.020(2)   | 0.014(2)   | 0.033(2)   | 0.0005(17)  | -0.0027(17) | -0.0012(17) |
| P(21)  | 0.0230(9)  | 0.0284(11) | 0.0156(8)  | -0.0021(7)  | 0.0021(7)   | 0.0084(8)   |
| F(21)  | 0.070(3)   | 0.061(3)   | 0.164(5)   | 0.006(3)    | -0.038(3)   | -0.038(2)   |
| F(20)  | 0.070(3)   | 0.061(3)   | 0.164(5)   | 0.006(3)    | -0.038(3)   | -0.038(2)   |
| G(21)  | 0.018(3)   | 0.014(3)   | 0.017(3)   | 0.004(3)    | -0.006(2)   | -0.002(3)   |
| P(22)  | 0.0190(9)  | 0.0205(10) | 0.0182(9)  | -0.0021(7)  | -0.0065(7)  | 0.0003(7)   |
| F(22)  | 0.070(3)   | 0.061(3)   | 0.164(5)   | 0.006(3)    | -0.038(3)   | -0.038(2)   |
| C(22)  | 0.013(3)   | 0.025(4)   | 0.018(3)   | -0.004(3)   | -0.002(3)   | 0.001(3)    |
| P(23)  | 0.0170(9)  | 0.0176(10) | 0.0188(9)  | -0.0041(7)  | 0.0001(7)   | -0.0014(7)  |
| C(23)  | 0.034(4)   | 0.020(4)   | 0.033(4)   | 0.000(3)    | -0.004(3)   | -0.011(4)   |
| C(24)  | 0.029(4)   | 0.021(4)   | 0.034(4)   | 0.005(3)    | 0.001(3)    | 0.001(3)    |
| F(24)  | 0.106(4)   | 0.037(3)   | 0.170(5)   | -0.031(3)   | 0.023(4)    | 0.017(2)    |

Continued on next page

**Table S43.** – continued from previous page

| atom   | U <sub>11</sub> | U <sub>22</sub> | U <sub>33</sub> | U <sub>23</sub> | U <sub>13</sub> | U <sub>12</sub> |
|--------|-----------------|-----------------|-----------------|-----------------|-----------------|-----------------|
| C(25)  | 0.023(4)        | 0.029(4)        | 0.021(3)        | 0.001(3)        | 0.007(3)        | -0.003(3)       |
| F(25)  | 0.106(4)        | 0.037(3)        | 0.170(5)        | -0.031(3)       | 0.023(4)        | 0.017(2)        |
| C(27)  | 0.024(4)        | 0.012(4)        | 0.030(4)        | 0.000(3)        | -0.005(3)       | 0.004(3)        |
| F(27)  | 0.054(4)        | 0.019(3)        | 0.130(6)        | -0.016(3)       | 0.009(4)        | -0.005(3)       |
| C(26)  | 0.029(4)        | 0.015(4)        | 0.020(3)        | -0.004(3)       | 0.008(3)        | 0.010(3)        |
| F(26)  | 0.106(4)        | 0.037(3)        | 0.170(5)        | -0.031(3)       | 0.023(4)        | 0.017(2)        |
| C(204) | 0.026(4)        | 0.018(4)        | 0.037(5)        | -0.001(3)       | -0.007(3)       | 0.001(3)        |
| F(28)  | 0.044(4)        | 0.040(4)        | 0.213(10)       | -0.040(5)       | -0.044(5)       | 0.024(3)        |
| C(28)  | 0.029(4)        | 0.015(4)        | 0.027(4)        | 0.002(3)        | 0.000(3)        | 0.004(3)        |
| Pd(2)  | 0.0135(2)       | 0.0206(3)       | 0.0146(2)       | 0.0006(2)       | -0.0011(2)      | 0.0025(2)       |
| F(2)   | 0.125(7)        | 0.082(6)        | 0.053(4)        | 0.016(4)        | -0.029(4)       | -0.064(5)       |
| B(2)   | 0.017(4)        | 0.022(5)        | 0.018(4)        | -0.001(3)       | -0.007(3)       | -0.005(3)       |
| C(2)   | 0.015(3)        | 0.018(4)        | 0.015(3)        | 0.003(3)        | -0.001(2)       | 0.006(3)        |
| I(2)   | 0.0169(2)       | 0.0802(5)       | 0.0344(3)       | -0.0027(3)      | -0.0024(2)      | 0.0138(3)       |
| F(29)  | 0.128(7)        | 0.056(5)        | 0.078(5)        | -0.012(4)       | 0.031(5)        | 0.029(5)        |
| C(205) | 0.020(2)        | 0.014(2)        | 0.033(2)        | 0.0005(17)      | -0.0027(17)     | -0.0012(17)     |
| C(206) | 0.020(2)        | 0.014(2)        | 0.033(2)        | 0.0005(17)      | -0.0027(17)     | -0.0012(17)     |
| F(30)  | 0.059(4)        | 0.033(4)        | 0.122(6)        | 0.032(4)        | -0.035(4)       | -0.007(3)       |
| C(31)  | 0.039(5)        | 0.025(5)        | 0.031(4)        | -0.001(3)       | 0.003(4)        | -0.010(4)       |
| F(31)  | 0.095(5)        | 0.064(5)        | 0.054(4)        | 0.031(3)        | 0.011(4)        | -0.015(4)       |
| C(32)  | 0.039(5)        | 0.039(5)        | 0.030(4)        | 0.002(4)        | -0.005(4)       | -0.017(4)       |
| F(32)  | 0.124(6)        | 0.028(3)        | 0.055(4)        | 0.005(3)        | -0.030(4)       | -0.035(4)       |
| C(33)  | 0.061(6)        | 0.026(5)        | 0.035(5)        | 0.012(4)        | -0.007(4)       | -0.006(4)       |
| F(33)  | 0.058(4)        | 0.034(3)        | 0.068(4)        | -0.001(3)       | 0.033(3)        | 0.012(3)        |
| C(34)  | 0.030(4)        | 0.030(4)        | 0.021(4)        | 0.006(3)        | 0.006(3)        | 0.001(3)        |
| F(34)  | 0.118(6)        | 0.023(3)        | 0.127(7)        | -0.007(4)       | 0.083(6)        | 0.002(3)        |
| C(207) | 0.052(3)        | 0.015(2)        | 0.015(2)        | 0.0029(16)      | -0.0002(19)     | -0.0070(19)     |
| F(36)  | 0.140(3)        | 0.113(2)        | 0.0607(15)      | 0.0074(15)      | 0.0041(16)      | -0.041(2)       |
| C(36)  | 0.027(4)        | 0.054(6)        | 0.030(4)        | -0.003(4)       | 0.007(3)        | -0.002(4)       |
| C(35)  | 0.045(5)        | 0.031(5)        | 0.029(4)        | 0.001(3)        | 0.020(4)        | 0.006(4)        |
| F(35)  | 0.068(4)        | 0.108(7)        | 0.064(4)        | -0.006(4)       | -0.013(3)       | 0.038(4)        |
| C(37)  | 0.031(4)        | 0.046(5)        | 0.021(4)        | 0.010(4)        | -0.005(3)       | 0.005(4)        |
| F(37)  | 0.140(3)        | 0.113(2)        | 0.0607(15)      | 0.0074(15)      | 0.0041(16)      | -0.041(2)       |
| C(38)  | 0.059(7)        | 0.085(9)        | 0.033(5)        | -0.006(5)       | -0.008(5)       | 0.017(6)        |
| F(38)  | 0.118(6)        | 0.107(6)        | 0.040(4)        | -0.017(4)       | 0.052(4)        | -0.043(5)       |
| C(39)  | 0.038(5)        | 0.054(6)        | 0.036(5)        | 0.006(4)        | -0.014(4)       | 0.004(4)        |
| F(39)  | 0.061(3)        | 0.101(5)        | 0.298(11)       | -0.050(5)       | -0.037(4)       | -0.034(3)       |
| C(208) | 0.140(3)        | 0.113(2)        | 0.0607(15)      | 0.0074(15)      | 0.0041(16)      | -0.041(2)       |
| C(209) | 0.070(3)        | 0.061(3)        | 0.164(5)        | 0.006(3)        | -0.038(3)       | -0.038(2)       |
| C(210) | 0.140(3)        | 0.113(2)        | 0.0607(15)      | 0.0074(15)      | 0.0041(16)      | -0.041(2)       |
| C(211) | 0.033(5)        | 0.016(4)        | 0.041(5)        | 0.001(3)        | -0.011(4)       | 0.001(3)        |
| C(40)  | 0.020(4)        | 0.022(4)        | 0.050(5)        | 0.003(4)        | 0.008(3)        | 0.002(3)        |
| F(40)  | 0.061(3)        | 0.101(5)        | 0.298(11)       | -0.050(5)       | -0.037(4)       | -0.034(3)       |
| C(212) | 0.031(5)        | 0.025(5)        | 0.078(7)        | -0.015(5)       | -0.003(5)       | 0.008(4)        |
| C(42)  | 0.092(8)        | 0.033(5)        | 0.026(5)        | 0.004(4)        | 0.022(5)        | 0.014(5)        |
| C(41)  | 0.056(6)        | 0.020(4)        | 0.041(5)        | 0.011(4)        | 0.003(4)        | 0.014(4)        |
| F(41)  | 0.061(3)        | 0.101(5)        | 0.298(11)       | -0.050(5)       | -0.037(4)       | -0.034(3)       |
| C(44)  | 0.017(4)        | 0.025(4)        | 0.050(5)        | 0.011(4)        | 0.009(3)        | 0.007(3)        |
| F(44)  | 0.140(3)        | 0.113(2)        | 0.0607(15)      | 0.0074(15)      | 0.0041(16)      | -0.041(2)       |
| F(43)  | 0.140(3)        | 0.113(2)        | 0.0607(15)      | 0.0074(15)      | 0.0041(16)      | -0.041(2)       |
| C(45)  | 0.027(4)        | 0.022(4)        | 0.033(4)        | 0.004(3)        | 0.004(3)        | 0.001(3)        |

Continued on next page

**Table S43.** – continued from previous page

| atom   | U <sub>11</sub> | U <sub>22</sub> | U <sub>33</sub> | U <sub>23</sub> | U <sub>13</sub> | U <sub>12</sub> |
|--------|-----------------|-----------------|-----------------|-----------------|-----------------|-----------------|
| F(45)  | 0.140(3)        | 0.113(2)        | 0.0607(15)      | 0.0074(15)      | 0.0041(16)      | -0.041(2)       |
| C(46)  | 0.025(4)        | 0.024(4)        | 0.031(4)        | 0.008(3)        | -0.005(3)       | -0.006(3)       |
| F(46)  | 0.140(3)        | 0.113(2)        | 0.0607(15)      | 0.0074(15)      | 0.0041(16)      | -0.041(2)       |
| C(213) | 0.052(3)        | 0.015(2)        | 0.015(2)        | 0.0029(16)      | -0.0002(19)     | -0.0070(19)     |
| C(47)  | 0.026(4)        | 0.032(5)        | 0.025(4)        | 0.015(3)        | -0.011(3)       | -0.007(3)       |
| F(47)  | 0.140(3)        | 0.113(2)        | 0.0607(15)      | 0.0074(15)      | 0.0041(16)      | -0.041(2)       |
| C(48)  | 0.033(5)        | 0.019(5)        | 0.085(8)        | 0.019(5)        | 0.006(5)        | -0.002(4)       |
| C(49)  | 0.073(5)        | 0.037(4)        | 0.113(6)        | 0.032(4)        | 0.004(4)        | -0.023(3)       |
| C(214) | 0.021(5)        | 0.042(6)        | 0.118(10)       | -0.025(6)       | -0.021(5)       | 0.009(4)        |
| C(50)  | 0.073(5)        | 0.037(4)        | 0.113(6)        | 0.032(4)        | 0.004(4)        | -0.023(3)       |
| C(51)  | 0.073(5)        | 0.037(4)        | 0.113(6)        | 0.032(4)        | 0.004(4)        | -0.023(3)       |
| C(53)  | 0.020(3)        | 0.023(4)        | 0.021(3)        | 0.006(3)        | -0.002(3)       | -0.004(3)       |
| C(54)  | 0.026(4)        | 0.019(4)        | 0.022(4)        | -0.003(3)       | -0.001(3)       | 0.003(3)        |
| C(56)  | 0.028(4)        | 0.028(4)        | 0.026(4)        | 0.006(3)        | -0.009(3)       | -0.007(3)       |
| C(55)  | 0.033(4)        | 0.024(5)        | 0.027(4)        | 0.002(3)        | -0.015(3)       | -0.013(3)       |
| C(57)  | 0.026(4)        | 0.029(5)        | 0.020(4)        | 0.005(3)        | -0.005(3)       | -0.001(3)       |
| C(58)  | 0.036(4)        | 0.026(4)        | 0.028(4)        | 0.009(3)        | -0.009(3)       | 0.008(3)        |
| C(59)  | 0.027(4)        | 0.058(6)        | 0.024(4)        | 0.001(4)        | -0.003(3)       | -0.004(4)       |
| C(215) | 0.107(9)        | 0.032(5)        | 0.014(4)        | -0.009(3)       | 0.010(5)        | -0.014(5)       |
| C(60)  | 0.039(5)        | 0.042(6)        | 0.027(4)        | 0.005(4)        | -0.012(3)       | -0.007(4)       |
| C(61)  | 0.026(4)        | 0.032(4)        | 0.016(3)        | 0.001(3)        | -0.008(3)       | 0.002(3)        |
| C(62)  | 0.036(4)        | 0.027(4)        | 0.025(4)        | 0.007(3)        | -0.008(3)       | 0.003(3)        |
| C(63)  | 0.064(6)        | 0.035(5)        | 0.018(4)        | -0.007(3)       | -0.003(4)       | 0.005(4)        |
| F(63)  | 0.118(4)        | 0.156(5)        | 0.058(3)        | 0.027(3)        | -0.056(3)       | -0.017(4)       |
| C(64)  | 0.027(4)        | 0.032(5)        | 0.048(5)        | 0.001(4)        | -0.011(4)       | -0.008(4)       |
| F(64)  | 0.118(4)        | 0.156(5)        | 0.058(3)        | 0.027(3)        | -0.056(3)       | -0.017(4)       |
| C(65)  | 0.030(4)        | 0.032(5)        | 0.057(6)        | -0.003(4)       | -0.017(4)       | -0.007(4)       |
| F(65)  | 0.118(4)        | 0.156(5)        | 0.058(3)        | 0.027(3)        | -0.056(3)       | -0.017(4)       |
| C(66)  | 0.041(5)        | 0.041(6)        | 0.060(6)        | 0.026(5)        | -0.014(5)       | -0.022(4)       |
| C(67)  | 0.072(7)        | 0.029(6)        | 0.070(7)        | -0.025(5)       | 0.030(6)        | -0.011(5)       |
| C(68)  | 0.084(8)        | 0.031(6)        | 0.078(8)        | -0.032(5)       | 0.032(7)        | -0.020(5)       |
| C(69)  | 0.21(2)         | 0.090(12)       | 0.066(9)        | -0.045(8)       | -0.063(11)      | 0.111(14)       |
| C(70)  | 0.044(5)        | 0.024(5)        | 0.047(5)        | -0.020(4)       | -0.003(4)       | 0.000(4)        |
| C(71)  | 0.028(4)        | 0.025(4)        | 0.025(4)        | -0.013(3)       | -0.006(3)       | 0.001(3)        |
| C(72)  | 0.030(4)        | 0.024(4)        | 0.027(4)        | -0.014(3)       | -0.006(3)       | -0.006(3)       |
| C(73)  | 0.021(4)        | 0.017(4)        | 0.024(4)        | 0.001(3)        | -0.003(3)       | 0.000(3)        |
| C(74)  | 0.029(4)        | 0.024(4)        | 0.022(4)        | -0.005(3)       | -0.014(3)       | 0.005(3)        |
| C(75)  | 0.035(4)        | 0.021(4)        | 0.037(4)        | -0.004(3)       | -0.013(4)       | 0.004(3)        |
| C(76)  | 0.102(6)        | 0.099(6)        | 0.039(4)        | -0.026(4)       | -0.021(4)       | 0.004(5)        |
| C(77)  | 0.102(6)        | 0.099(6)        | 0.039(4)        | -0.026(4)       | -0.021(4)       | 0.004(5)        |
| C(78)  | 0.102(6)        | 0.099(6)        | 0.039(4)        | -0.026(4)       | -0.021(4)       | 0.004(5)        |
| C(79)  | 0.050(5)        | 0.041(5)        | 0.017(4)        | -0.003(3)       | -0.014(3)       | 0.001(4)        |
| C(80)  | 0.032(4)        | 0.018(4)        | 0.018(3)        | -0.004(3)       | -0.010(3)       | 0.008(3)        |
| C(81)  | 0.036(4)        | 0.026(4)        | 0.019(4)        | -0.004(3)       | -0.004(3)       | 0.007(3)        |
| C(82)  | 0.028(4)        | 0.022(4)        | 0.017(3)        | -0.003(3)       | 0.001(3)        | 0.014(3)        |
| C(83)  | 0.031(4)        | 0.020(4)        | 0.021(3)        | -0.008(3)       | -0.006(3)       | 0.009(3)        |
| C(84)  | 0.029(4)        | 0.028(5)        | 0.026(4)        | -0.003(3)       | -0.015(3)       | 0.009(3)        |
| C(85)  | 0.034(4)        | 0.036(5)        | 0.043(5)        | -0.016(4)       | -0.004(4)       | 0.011(4)        |
| C(86)  | 0.057(7)        | 0.055(7)        | 0.073(8)        | -0.016(6)       | 0.006(6)        | 0.013(5)        |
| C(87)  | 0.036(5)        | 0.050(6)        | 0.047(5)        | 0.022(5)        | 0.020(4)        | 0.018(4)        |
| C(88)  | 0.049(6)        | 0.046(6)        | 0.039(5)        | 0.021(4)        | 0.013(4)        | 0.008(5)        |

Continued on next page

**Table S43.** – continued from previous page

| atom   | U <sub>11</sub> | U <sub>22</sub> | U <sub>33</sub> | U <sub>23</sub> | U <sub>13</sub> | U <sub>12</sub> |
|--------|-----------------|-----------------|-----------------|-----------------|-----------------|-----------------|
| C(89)  | 0.089(9)        | 0.051(7)        | 0.043(6)        | 0.008(5)        | 0.017(6)        | 0.000(6)        |
| C(90)  | 0.051(6)        | 0.020(5)        | 0.107(10)       | -0.009(6)       | 0.019(6)        | 0.000(4)        |
| C(91)  | 0.046(5)        | 0.022(4)        | 0.025(4)        | 0.005(3)        | -0.011(4)       | -0.011(4)       |
| C(92)  | 0.018(3)        | 0.027(4)        | 0.021(4)        | -0.003(3)       | 0.000(3)        | -0.004(3)       |
| C(93)  | 0.027(4)        | 0.017(4)        | 0.014(3)        | -0.004(3)       | 0.001(3)        | 0.003(3)        |
| C(94)  | 0.023(4)        | 0.024(5)        | 0.057(6)        | -0.003(4)       | -0.007(4)       | -0.001(3)       |
| C(95)  | 0.028(5)        | 0.039(7)        | 0.108(10)       | 0.001(6)        | -0.005(5)       | 0.009(4)        |
| C(96)  | 0.013(4)        | 0.019(5)        | 0.108(9)        | -0.006(5)       | -0.005(4)       | 0.007(3)        |
| C(97)  | 0.021(3)        | 0.011(4)        | 0.027(4)        | 0.004(3)        | -0.007(3)       | 0.001(3)        |
| C(98)  | 0.029(4)        | 0.035(5)        | 0.029(4)        | 0.001(4)        | -0.007(3)       | -0.011(4)       |
| C(99)  | 0.035(4)        | 0.021(4)        | 0.021(4)        | 0.005(3)        | -0.003(3)       | -0.008(3)       |
| C(100) | 0.013(3)        | 0.013(4)        | 0.018(3)        | -0.001(3)       | -0.003(3)       | -0.003(3)       |
| C(101) | 0.025(4)        | 0.020(4)        | 0.022(4)        | 0.004(3)        | -0.001(3)       | -0.002(3)       |
| C(102) | 0.006(3)        | 0.020(4)        | 0.020(3)        | 0.002(3)        | 0.006(2)        | 0.002(3)        |
| C(103) | 0.014(3)        | 0.015(4)        | 0.032(4)        | -0.006(3)       | -0.001(3)       | 0.004(3)        |
| C(104) | 0.035(4)        | 0.017(4)        | 0.035(4)        | -0.003(3)       | 0.002(3)        | -0.007(3)       |
| C(105) | 0.024(4)        | 0.022(4)        | 0.026(4)        | 0.003(3)        | -0.006(3)       | -0.002(3)       |
| C(106) | 0.074(7)        | 0.024(5)        | 0.034(5)        | 0.004(4)        | -0.032(5)       | -0.019(5)       |
| C(107) | 0.080(7)        | 0.041(6)        | 0.016(4)        | 0.002(4)        | -0.007(4)       | -0.015(5)       |
| C(108) | 0.125(13)       | 0.088(11)       | 0.032(6)        | -0.022(6)       | -0.024(7)       | -0.030(10)      |
| C(109) | 0.052(3)        | 0.015(2)        | 0.015(2)        | 0.0029(16)      | -0.0002(19)     | -0.0070(19)     |
| C(110) | 0.080(7)        | 0.023(5)        | 0.019(4)        | 0.001(3)        | 0.021(4)        | -0.005(4)       |
| C(111) | 0.081(9)        | 0.051(7)        | 0.037(6)        | -0.006(5)       | 0.019(6)        | 0.007(6)        |
| C(112) | 0.012(3)        | 0.013(3)        | 0.012(3)        | -0.002(2)       | 0.002(2)        | 0.000(2)        |
| C(113) | 0.015(3)        | 0.019(4)        | 0.022(3)        | -0.001(3)       | -0.001(3)       | 0.004(3)        |
| C(114) | 0.0538(18)      | 0.062(2)        | 0.0403(16)      | 0.0206(15)      | 0.0208(14)      | -0.0055(16)     |
| C(115) | 0.017(3)        | 0.022(4)        | 0.016(3)        | -0.004(3)       | 0.001(3)        | -0.001(3)       |
| C(117) | 0.013(3)        | 0.013(4)        | 0.015(3)        | -0.007(3)       | -0.003(2)       | -0.002(3)       |
| C(118) | 0.031(4)        | 0.022(4)        | 0.017(3)        | -0.001(3)       | -0.012(3)       | 0.000(3)        |
| C(120) | 0.018(3)        | 0.018(4)        | 0.020(3)        | -0.001(3)       | 0.002(3)        | -0.003(3)       |
| C(121) | 0.041(5)        | 0.028(4)        | 0.011(3)        | 0.002(3)        | -0.002(3)       | -0.008(4)       |
| C(122) | 0.140(3)        | 0.113(2)        | 0.0607(15)      | 0.0074(15)      | 0.0041(16)      | -0.041(2)       |
| C(123) | 0.045(5)        | 0.036(5)        | 0.042(5)        | 0.009(4)        | -0.017(4)       | -0.012(4)       |
| C(124) | 0.026(4)        | 0.024(4)        | 0.023(4)        | 0.003(3)        | -0.001(3)       | -0.007(3)       |
| C(125) | 0.038(5)        | 0.032(5)        | 0.029(4)        | 0.002(3)        | -0.012(4)       | -0.004(4)       |
| C(126) | 0.118(4)        | 0.156(5)        | 0.058(3)        | 0.027(3)        | -0.056(3)       | -0.017(4)       |
| C(127) | 0.021(3)        | 0.013(4)        | 0.012(3)        | -0.002(3)       | -0.001(3)       | -0.003(3)       |
| C(128) | 0.078(7)        | 0.035(6)        | 0.018(4)        | -0.003(4)       | -0.020(4)       | 0.030(5)        |
| C(129) | 0.106(4)        | 0.037(3)        | 0.170(5)        | -0.031(3)       | 0.023(4)        | 0.017(2)        |
| C(150) | 0.140(3)        | 0.113(2)        | 0.0607(15)      | 0.0074(15)      | 0.0041(16)      | -0.041(2)       |
| C(151) | 0.140(3)        | 0.113(2)        | 0.0607(15)      | 0.0074(15)      | 0.0041(16)      | -0.041(2)       |
| C(152) | 0.140(3)        | 0.113(2)        | 0.0607(15)      | 0.0074(15)      | 0.0041(16)      | -0.041(2)       |
| C(153) | 0.061(3)        | 0.101(5)        | 0.298(11)       | -0.050(5)       | -0.037(4)       | -0.034(3)       |
| C(154) | 0.033(5)        | 0.016(5)        | 0.086(8)        | -0.010(4)       | -0.006(5)       | -0.003(4)       |
| F(250) | 0.140(3)        | 0.113(2)        | 0.0607(15)      | 0.0074(15)      | 0.0041(16)      | -0.041(2)       |



**Table S44.** Distances [Å] for  $[(\text{PC}(\text{sp}^3)(\text{PMe}_3)\text{P})^{\text{tBu}}\text{PdI}][\text{BARf}_4^-]$  (**12**).

| atom – atom     | distance   | atom – atom     | distance   |
|-----------------|------------|-----------------|------------|
| Pd – C          | 2.119(7)   | Pd – P(1)       | 2.264(2)   |
| Pd – P(2)       | 2.3279(18) | Pd – I          | 2.6340(7)  |
| F(1) – C(108)   | 1.355(14)  | B(1) – C(203)   | 1.639(11)  |
| B(1) – C(102)   | 1.642(11)  | B(1) – C(109)   | 1.645(11)  |
| B(1) – C(117)   | 1.650(11)  | C – C(21)       | 1.533(9)   |
| C – C(11)       | 1.534(10)  | C – P(3)        | 1.856(7)   |
| F(9) – C(104)   | 1.325(9)   | F(8) – C(104)   | 1.370(10)  |
| F(7) – C(104)   | 1.313(10)  | F(6) – C(111)   | 1.315(15)  |
| F(5) – C(111)   | 1.329(14)  | F(4) – C(111)   | 1.299(12)  |
| F(3) – C(108)   | 1.378(19)  | P(1) – C(101)   | 1.797(8)   |
| P(1) – C(37)    | 1.838(8)   | P(1) – C(40)    | 1.838(8)   |
| F(11) – C(106)  | 1.313(13)  | C(11) – C(101)  | 1.381(10)  |
| C(11) – C(47)   | 1.395(10)  | P(2) – C(100)   | 1.817(7)   |
| P(2) – C(34)    | 1.831(8)   | P(2) – C(31)    | 1.853(9)   |
| F(12) – C(106)  | 1.354(13)  | C(21) – C(56)   | 1.383(11)  |
| C(21) – C(100)  | 1.418(10)  | P(3) – C(15)    | 1.782(9)   |
| P(3) – C(14)    | 1.786(9)   | P(3) – C(13)    | 1.794(8)   |
| F(13) – C(106)  | 1.338(10)  | C(13) – H(13A)  | 0.9800     |
| C(13) – H(13B)  | 0.9800     | C(13) – H(13C)  | 0.9800     |
| F(14) – C(114)  | 1.322(13)  | C(14) – H(14A)  | 0.9800     |
| C(14) – H(14B)  | 0.9800     | C(14) – H(14C)  | 0.9800     |
| C(15) – H(15A)  | 0.9800     | C(15) – H(15B)  | 0.9800     |
| C(15) – H(15C)  | 0.9800     | F(15) – C(114)  | 1.344(13)  |
| C(200) – C(117) | 1.389(10)  | C(200) – C(115) | 1.391(11)  |
| C(200) – H(200) | 0.9500     | F(16) – C(114)  | 1.338(13)  |
| C(16) – C(152)  | 1.34(2)    | C(16) – C(210)  | 1.40(2)    |
| C(16) – H(16)   | 0.9500     | C(017) – C(112) | 1.383(10)  |
| C(017) – C(117) | 1.390(9)   | C(017) – H(017) | 0.9500     |
| F(17) – C(113)  | 1.335(8)   | C(17) – C(152)  | 1.36(2)    |
| C(17) – C(208)  | 1.39(2)    | C(17) – H(17)   | 0.9500     |
| C(018) – C(205) | 1.355(11)  | C(018) – C(204) | 1.408(12)  |
| C(018) – H(018) | 0.9500     | F(18) – C(113)  | 1.345(8)   |
| C(18) – C(208)  | 1.35(2)    | C(18) – C(210)  | 1.39(2)    |
| C(18) – H(18)   | 0.9500     | F(19) – C(113)  | 1.324(8)   |
| C(201) – C(115) | 1.382(10)  | C(201) – C(112) | 1.392(9)   |
| C(201) – H(201) | 0.9500     | C(202) – C(204) | 1.351(11)  |
| C(202) – C(203) | 1.399(11)  | C(202) – H(202) | 0.9500     |
| C(203) – C(206) | 1.392(11)  | P(21) – C(82)   | 1.807(7)   |
| P(21) – C(85)   | 1.825(9)   | P(21) – C(87)   | 1.845(9)   |
| P(21) – Pd(2)   | 2.2636(18) | F(21) – C(209)  | 1.300(19)  |
| F(20) – C(209)  | 1.41(2)    | G(21) – C(82)   | 1.386(10)  |
| G(21) – C(83)   | 1.399(10)  | G(21) – C(2)    | 1.525(9)   |
| P(22) – C(73)   | 1.830(8)   | P(22) – C(64)   | 1.837(8)   |
| P(22) – C(61)   | 1.852(8)   | P(22) – Pd(2)   | 2.3231(19) |
| F(22) – C(209)  | 1.276(19)  | C(22) – C(73)   | 1.380(10)  |
| C(22) – C(74)   | 1.394(10)  | C(22) – C(2)    | 1.549(10)  |
| P(23) – C(25)   | 1.765(7)   | P(23) – C(24)   | 1.777(8)   |
| P(23) – C(23)   | 1.807(8)   | P(23) – C(2)    | 1.853(7)   |
| C(23) – H(23A)  | 0.9800     | C(23) – H(23B)  | 0.9800     |
| C(23) – H(23C)  | 0.9800     | C(24) – H(24A)  | 0.9800     |

Continued on next page

**Table S44.** – continued from previous page

| <b>atom – atom</b> | <b>distance</b> | <b>atom – atom</b> | <b>distance</b> |
|--------------------|-----------------|--------------------|-----------------|
| C(24) – H(24B)     | 0.9800          | C(24) – H(24C)     | 0.9800          |
| F(24) – C(129)     | 1.26(2)         | C(25) – H(25A)     | 0.9800          |
| C(25) – H(25B)     | 0.9800          | C(25) – H(25C)     | 0.9800          |
| F(25) – C(129)     | 1.39(2)         | C(27) – C(105)     | 1.356(11)       |
| C(27) – C(103)     | 1.362(11)       | C(27) – H(27)      | 0.9500          |
| F(27) – C(154)     | 1.329(12)       | C(26) – C(103)     | 1.387(11)       |
| C(26) – C(102)     | 1.390(11)       | C(26) – H(26)      | 0.9500          |
| F(26) – C(129)     | 1.31(2)         | C(204) – C(209)    | 1.448(15)       |
| F(28) – C(154)     | 1.287(12)       | C(28) – C(102)     | 1.405(10)       |
| C(28) – C(105)     | 1.410(11)       | C(28) – H(28)      | 0.9500          |
| Pd(2) – C(2)       | 2.129(7)        | Pd(2) – I(2)       | 2.6398(7)       |
| F(2) – C(108)      | 1.329(17)       | B(2) – C(120)      | 1.619(11)       |
| B(2) – C(211)      | 1.641(12)       | B(2) – C(127)      | 1.647(10)       |
| B(2) – C(208)      | 1.663(18)       | F(29) – C(154)     | 1.355(14)       |
| C(205) – C(206)    | 1.414(11)       | C(205) – C(129)    | 1.463(15)       |
| C(206) – H(206)    | 0.9500          | F(30) – C(123)     | 1.303(11)       |
| C(31) – C(32)      | 1.487(12)       | C(31) – C(33)      | 1.545(11)       |
| C(31) – H(31)      | 1.0000          | F(31) – C(123)     | 1.364(13)       |
| C(32) – H(32A)     | 0.9800          | C(32) – H(32B)     | 0.9800          |
| C(32) – H(32C)     | 0.9800          | F(32) – C(123)     | 1.275(11)       |
| C(33) – H(33A)     | 0.9800          | C(33) – H(33B)     | 0.9800          |
| C(33) – H(33C)     | 0.9800          | F(33) – C(128)     | 1.337(11)       |
| C(34) – C(35)      | 1.528(12)       | C(34) – C(36)      | 1.532(11)       |
| C(34) – H(34)      | 1.0000          | F(34) – C(128)     | 1.297(12)       |
| C(207) – C(110)    | 1.386(11)       | C(207) – C(109)    | 1.408(12)       |
| C(207) – H(207)    | 0.9500          | F(36) – C(122)     | 1.32(2)         |
| C(36) – H(36A)     | 0.9800          | C(36) – H(36B)     | 0.9800          |
| C(36) – H(36C)     | 0.9800          | C(35) – H(35A)     | 0.9800          |
| C(35) – H(35B)     | 0.9800          | C(35) – H(35C)     | 0.9800          |
| F(35) – C(128)     | 1.349(12)       | C(37) – C(38)      | 1.482(14)       |
| C(37) – C(39)      | 1.540(12)       | C(37) – H(37)      | 1.0000          |
| F(37) – C(122)     | 1.29(2)         | C(38) – H(38A)     | 0.9800          |
| C(38) – H(38B)     | 0.9800          | C(38) – H(38C)     | 0.9800          |
| F(38) – C(122)     | 1.27(2)         | C(39) – H(39A)     | 0.9800          |
| C(39) – H(39B)     | 0.9800          | C(39) – H(39C)     | 0.9800          |
| F(39) – C(153)     | 1.27(2)         | C(210) – C(150)    | 1.48(2)         |
| C(211) – C(94)     | 1.390(12)       | C(211) – C(96)     | 1.391(12)       |
| C(40) – C(42)      | 1.487(13)       | C(40) – C(41)      | 1.556(11)       |
| C(40) – H(40)      | 1.0000          | F(40) – C(153)     | 1.35(3)         |
| C(212) – C(94)     | 1.402(12)       | C(212) – C(95)     | 1.417(15)       |
| C(212) – C(154)    | 1.535(13)       | C(42) – H(42A)     | 0.9500          |
| C(42) – H(42B)     | 0.9500          | C(41) – H(41A)     | 0.9800          |
| C(41) – H(41B)     | 0.9800          | C(41) – H(41C)     | 0.9800          |
| F(41) – C(153)     | 1.24(3)         | C(44) – C(45)      | 1.357(12)       |
| C(44) – C(101)     | 1.413(11)       | C(44) – H(44)      | 0.9500          |
| F(44) – C(151)     | 1.49(2)         | F(43) – C(151)     | 1.201(18)       |
| C(45) – C(46)      | 1.428(11)       | C(45) – C(48)      | 1.524(11)       |
| F(45) – C(151)     | 1.246(17)       | C(46) – C(47)      | 1.368(11)       |
| C(46) – H(46)      | 0.9500          | F(46) – C(150)     | 1.37(2)         |
| F(46) – F(47)      | 1.744(16)       | C(213) – C(107)    | 1.417(11)       |
| C(213) – C(109)    | 1.430(12)       | C(213) – H(213)    | 0.9500          |

Continued on next page

**Table S44.** – continued from previous page

| <b>atom – atom</b> | <b>distance</b> | <b>atom – atom</b> | <b>distance</b> |
|--------------------|-----------------|--------------------|-----------------|
| C(47) – H(47)      | 0.9500          | F(47) – C(150)     | 1.30(2)         |
| C(48) – C(51)      | 1.522(16)       | C(48) – C(50)      | 1.533(18)       |
| C(48) – C(49)      | 1.585(18)       | C(49) – H(49A)     | 0.9800          |
| C(49) – H(49B)     | 0.9800          | C(49) – H(49C)     | 0.9800          |
| C(214) – C(95)     | 1.329(15)       | C(214) – C(153)    | 1.41(2)         |
| C(214) – C(96)     | 1.414(12)       | C(50) – H(50A)     | 0.9800          |
| C(50) – H(50B)     | 0.9800          | C(50) – H(50C)     | 0.9800          |
| C(51) – H(51A)     | 0.9800          | C(51) – H(51B)     | 0.9800          |
| C(51) – H(51C)     | 0.9800          | C(53) – C(100)     | 1.379(10)       |
| C(53) – C(54)      | 1.398(10)       | C(53) – H(53)      | 0.9500          |
| C(54) – C(55)      | 1.384(11)       | C(54) – C(57)      | 1.526(10)       |
| C(56) – C(55)      | 1.373(11)       | C(56) – H(56)      | 0.9500          |
| C(55) – H(55)      | 0.9500          | C(57) – C(60)      | 1.520(11)       |
| C(57) – C(59)      | 1.523(11)       | C(57) – C(58)      | 1.523(11)       |
| C(58) – H(58A)     | 0.9800          | C(58) – H(58B)     | 0.9800          |
| C(58) – H(58C)     | 0.9800          | C(59) – H(59A)     | 0.9800          |
| C(59) – H(59B)     | 0.9800          | C(59) – H(59C)     | 0.9800          |
| C(215) – C(107)    | 1.356(16)       | C(215) – C(110)    | 1.389(16)       |
| C(215) – H(215)    | 0.9500          | C(60) – H(60A)     | 0.9800          |
| C(60) – H(60B)     | 0.9800          | C(60) – H(60C)     | 0.9800          |
| C(61) – C(63)      | 1.509(11)       | C(61) – C(62)      | 1.547(11)       |
| C(61) – H(61)      | 1.0000          | C(62) – H(62A)     | 0.9800          |
| C(62) – H(62B)     | 0.9800          | C(62) – H(62C)     | 0.9800          |
| C(63) – H(63A)     | 0.9800          | C(63) – H(63B)     | 0.9800          |
| C(63) – H(63C)     | 0.9800          | F(63) – C(126)     | 1.29(2)         |
| C(64) – C(65)      | 1.508(11)       | C(64) – C(66)      | 1.518(13)       |
| C(64) – H(64)      | 1.0000          | F(64) – C(126)     | 1.34(2)         |
| C(65) – H(65A)     | 0.9800          | C(65) – H(65B)     | 0.9800          |
| C(65) – H(65C)     | 0.9800          | F(65) – C(126)     | 1.32(2)         |
| C(66) – H(66A)     | 0.9800          | C(66) – H(66B)     | 0.9800          |
| C(66) – H(66C)     | 0.9800          | C(67) – C(70)      | 1.596(15)       |
| C(67) – H(67A)     | 0.9800          | C(67) – H(67B)     | 0.9800          |
| C(67) – H(67C)     | 0.9800          | C(68) – C(70)      | 1.531(14)       |
| C(68) – H(68A)     | 0.9800          | C(68) – H(68B)     | 0.9800          |
| C(68) – H(68C)     | 0.9800          | C(69) – C(70)      | 1.479(16)       |
| C(69) – H(69A)     | 0.9800          | C(69) – H(69B)     | 0.9800          |
| C(69) – H(69C)     | 0.9800          | C(70) – C(71)      | 1.510(11)       |
| C(71) – C(72)      | 1.374(12)       | C(71) – C(75)      | 1.428(11)       |
| C(72) – C(73)      | 1.378(11)       | C(72) – H(72)      | 0.9500          |
| C(74) – C(75)      | 1.379(11)       | C(74) – H(74)      | 0.9500          |
| C(75) – H(75)      | 0.9500          | C(76) – C(79)      | 1.493(18)       |
| C(76) – H(76A)     | 0.9800          | C(76) – H(76B)     | 0.9800          |
| C(76) – H(76C)     | 0.9800          | C(77) – C(79)      | 1.510(17)       |
| C(77) – H(77A)     | 0.9800          | C(77) – H(77B)     | 0.9800          |
| C(77) – H(77C)     | 0.9800          | C(78) – C(79)      | 1.554(16)       |
| C(78) – H(78A)     | 0.9800          | C(78) – H(78B)     | 0.9800          |
| C(78) – H(78C)     | 0.9800          | C(79) – C(80)      | 1.536(10)       |
| C(80) – C(81)      | 1.375(11)       | C(80) – C(84)      | 1.378(11)       |
| C(81) – C(82)      | 1.413(10)       | C(81) – H(81)      | 0.9500          |
| C(83) – C(84)      | 1.381(10)       | C(83) – H(83)      | 0.9500          |
| C(84) – H(84)      | 0.9500          | C(85) – C(86)      | 1.501(14)       |

Continued on next page

**Table S44.** – continued from previous page

| <b>atom – atom</b> | <b>distance</b> | <b>atom – atom</b> | <b>distance</b> |
|--------------------|-----------------|--------------------|-----------------|
| C(85) – C(90)      | 1.508(15)       | C(85) – H(85)      | 1.0000          |
| C(86) – H(86A)     | 0.9800          | C(86) – H(86B)     | 0.9800          |
| C(86) – H(86C)     | 0.9800          | C(87) – C(89)      | 1.451(14)       |
| C(87) – C(88)      | 1.499(14)       | C(87) – H(87)      | 1.0000          |
| C(88) – H(88A)     | 0.9500          | C(88) – H(88B)     | 0.9500          |
| C(89) – H(89A)     | 0.9800          | C(89) – H(89B)     | 0.9800          |
| C(89) – H(89C)     | 0.9800          | C(90) – H(90A)     | 0.9800          |
| C(90) – H(90B)     | 0.9800          | C(90) – H(90C)     | 0.9800          |
| C(91) – C(121)     | 1.361(13)       | C(91) – C(118)     | 1.368(12)       |
| C(91) – H(91)      | 0.9500          | C(92) – C(121)     | 1.371(12)       |
| C(92) – C(120)     | 1.388(10)       | C(92) – H(92)      | 0.9500          |
| C(93) – C(118)     | 1.370(11)       | C(93) – C(120)     | 1.408(10)       |
| C(93) – H(93)      | 0.9500          | C(94) – H(94)      | 0.9500          |
| C(95) – H(95)      | 0.9500          | C(96) – H(96)      | 0.9500          |
| C(97) – C(124)     | 1.371(11)       | C(97) – C(127)     | 1.407(10)       |
| C(97) – H(97)      | 0.9500          | C(98) – C(124)     | 1.367(11)       |
| C(98) – C(125)     | 1.379(12)       | C(98) – H(98)      | 0.9500          |
| C(99) – C(127)     | 1.358(10)       | C(99) – C(125)     | 1.399(12)       |
| C(99) – H(99)      | 0.9500          | C(103) – C(104)    | 1.482(11)       |
| C(105) – C(106)    | 1.492(11)       | C(107) – C(108)    | 1.481(17)       |
| C(110) – C(111)    | 1.459(16)       | C(112) – C(113)    | 1.487(9)        |
| C(114) – C(115)    | 1.465(11)       | C(118) – C(128)    | 1.504(12)       |
| C(121) – C(122)    | 1.473(18)       | C(123) – C(124)    | 1.519(12)       |
| C(125) – C(126)    | 1.434(15)       | C(150) – F(250)    | 1.274(19)       |
| C(151) – C(152)    | 1.48(2)         |                    |                 |

**Table S45.** Angles [°] for  $[\{\text{PC}(\text{sp}^3)(\text{PMe}_3)\text{P}\}^{\text{tBu}}\text{PdI}][\text{BAr}_4^{\text{F}}]$  (**12**).

| atom – atom – atom       | angle     | atom – atom – atom       | angle      |
|--------------------------|-----------|--------------------------|------------|
| C – Pd – P(1)            | 85.6(2)   | C – Pd – P(2)            | 86.13(19)  |
| P(1) – Pd – P(2)         | 162.70(7) | C – Pd – I               | 177.58(19) |
| P(1) – Pd – I            | 91.96(5)  | P(2) – Pd – I            | 96.27(5)   |
| C(203) – B(1) – C(102)   | 108.0(6)  | C(203) – B(1) – C(109)   | 110.2(6)   |
| C(102) – B(1) – C(109)   | 111.9(6)  | C(203) – B(1) – C(117)   | 111.0(6)   |
| C(102) – B(1) – C(117)   | 108.7(6)  | C(109) – B(1) – C(117)   | 107.0(6)   |
| C(21) – C – C(11)        | 115.8(6)  | C(21) – C – P(3)         | 107.6(5)   |
| C(11) – C – P(3)         | 105.9(5)  | C(21) – C – Pd           | 108.4(4)   |
| C(11) – C – Pd           | 113.8(5)  | P(3) – C – Pd            | 104.4(3)   |
| C(101) – P(1) – C(37)    | 104.0(4)  | C(101) – P(1) – C(40)    | 105.8(4)   |
| C(37) – P(1) – C(40)     | 107.7(4)  | C(101) – P(1) – Pd       | 103.0(3)   |
| C(37) – P(1) – Pd        | 125.9(3)  | C(40) – P(1) – Pd        | 108.7(3)   |
| C(101) – C(11) – C(47)   | 116.9(7)  | C(101) – C(11) – C       | 120.8(6)   |
| C(47) – C(11) – C        | 122.0(6)  | C(100) – P(2) – C(34)    | 100.8(3)   |
| C(100) – P(2) – C(31)    | 108.9(4)  | C(34) – P(2) – C(31)     | 105.8(4)   |
| C(100) – P(2) – Pd       | 98.5(2)   | C(34) – P(2) – Pd        | 116.7(3)   |
| C(31) – P(2) – Pd        | 123.2(3)  | C(56) – C(21) – C(100)   | 116.0(6)   |
| C(56) – C(21) – C        | 124.5(7)  | C(100) – C(21) – C       | 119.5(6)   |
| C(15) – P(3) – C(14)     | 108.0(5)  | C(15) – P(3) – C(13)     | 106.2(4)   |
| C(14) – P(3) – C(13)     | 101.9(4)  | C(15) – P(3) – C         | 111.2(4)   |
| C(14) – P(3) – C         | 115.3(4)  | C(13) – P(3) – C         | 113.4(4)   |
| P(3) – C(13) – H(13A)    | 109.5     | P(3) – C(13) – H(13B)    | 109.5      |
| H(13A) – C(13) – H(13B)  | 109.5     | P(3) – C(13) – H(13C)    | 109.5      |
| H(13A) – C(13) – H(13C)  | 109.5     | H(13B) – C(13) – H(13C)  | 109.5      |
| P(3) – C(14) – H(14A)    | 109.5     | P(3) – C(14) – H(14B)    | 109.5      |
| H(14A) – C(14) – H(14B)  | 109.5     | P(3) – C(14) – H(14C)    | 109.5      |
| H(14A) – C(14) – H(14C)  | 109.5     | H(14B) – C(14) – H(14C)  | 109.5      |
| P(3) – C(15) – H(15A)    | 109.5     | P(3) – C(15) – H(15B)    | 109.5      |
| H(15A) – C(15) – H(15B)  | 109.5     | P(3) – C(15) – H(15C)    | 109.5      |
| H(15A) – C(15) – H(15C)  | 109.5     | H(15B) – C(15) – H(15C)  | 109.5      |
| C(117) – C(200) – C(115) | 121.0(6)  | C(117) – C(200) – H(200) | 119.5      |
| C(115) – C(200) – H(200) | 119.5     | C(152) – C(16) – C(210)  | 115.7(16)  |
| C(152) – C(16) – H(16)   | 122.1     | C(210) – C(16) – H(16)   | 122.1      |
| C(112) – C(017) – C(117) | 121.5(6)  | C(112) – C(017) – H(017) | 119.3      |
| C(117) – C(017) – H(017) | 119.3     | C(152) – C(17) – C(208)  | 121.5(18)  |
| C(152) – C(17) – H(17)   | 119.3     | C(208) – C(17) – H(17)   | 119.3      |
| C(205) – C(018) – C(204) | 118.2(7)  | C(205) – C(018) – H(018) | 120.9      |
| C(204) – C(018) – H(018) | 120.9     | C(208) – C(18) – C(210)  | 121.9(18)  |
| C(208) – C(18) – H(18)   | 119.0     | C(210) – C(18) – H(18)   | 119.0      |
| C(115) – C(201) – C(112) | 117.8(7)  | C(115) – C(201) – H(201) | 121.1      |
| C(112) – C(201) – H(201) | 121.1     | C(204) – C(202) – C(203) | 123.0(7)   |
| C(204) – C(202) – H(202) | 118.5     | C(203) – C(202) – H(202) | 118.5      |
| C(206) – C(203) – C(202) | 116.0(7)  | C(206) – C(203) – B(1)   | 121.1(7)   |
| C(202) – C(203) – B(1)   | 122.8(7)  | C(82) – P(21) – C(85)    | 105.9(4)   |
| C(82) – P(21) – C(87)    | 105.4(4)  | C(85) – P(21) – C(87)    | 107.8(4)   |
| C(82) – P(21) – Pd(2)    | 102.8(2)  | C(85) – P(21) – Pd(2)    | 124.3(3)   |
| C(87) – P(21) – Pd(2)    | 109.0(4)  | C(82) – G(21) – C(83)    | 117.2(6)   |
| C(82) – G(21) – C(2)     | 120.7(6)  | C(83) – G(21) – C(2)     | 121.8(6)   |
| C(73) – P(22) – C(64)    | 101.2(4)  | C(73) – P(22) – C(61)    | 108.0(3)   |
| C(64) – P(22) – C(61)    | 107.5(4)  | C(73) – P(22) – Pd(2)    | 98.3(2)    |

Continued on next page

**Table S45.** – continued from previous page

| <b>atom – atom – atom</b> | <b>angle</b> | <b>atom – atom – atom</b> | <b>angle</b> |
|---------------------------|--------------|---------------------------|--------------|
| C(64) – P(22) – Pd(2)     | 115.0(3)     | C(61) – P(22) – Pd(2)     | 123.7(3)     |
| C(73) – C(22) – C(74)     | 116.3(7)     | C(73) – C(22) – C(2)      | 121.2(6)     |
| C(74) – C(22) – C(2)      | 122.4(6)     | C(25) – P(23) – C(24)     | 108.2(4)     |
| C(25) – P(23) – C(23)     | 105.9(4)     | C(24) – P(23) – C(23)     | 103.4(4)     |
| C(25) – P(23) – C(2)      | 111.7(4)     | C(24) – P(23) – C(2)      | 114.4(3)     |
| C(23) – P(23) – C(2)      | 112.7(3)     | P(23) – C(23) – H(23A)    | 109.5        |
| P(23) – C(23) – H(23B)    | 109.5        | H(23A) – C(23) – H(23B)   | 109.5        |
| P(23) – C(23) – H(23C)    | 109.5        | H(23A) – C(23) – H(23C)   | 109.5        |
| H(23B) – C(23) – H(23C)   | 109.5        | P(23) – C(24) – H(24A)    | 109.5        |
| P(23) – C(24) – H(24B)    | 109.5        | H(24A) – C(24) – H(24B)   | 109.5        |
| P(23) – C(24) – H(24C)    | 109.5        | H(24A) – C(24) – H(24C)   | 109.5        |
| H(24B) – C(24) – H(24C)   | 109.5        | P(23) – C(25) – H(25A)    | 109.5        |
| P(23) – C(25) – H(25B)    | 109.5        | H(25A) – C(25) – H(25B)   | 109.5        |
| P(23) – C(25) – H(25C)    | 109.5        | H(25A) – C(25) – H(25C)   | 109.5        |
| H(25B) – C(25) – H(25C)   | 109.5        | C(105) – C(27) – C(103)   | 119.5(7)     |
| C(105) – C(27) – H(27)    | 120.3        | C(103) – C(27) – H(27)    | 120.3        |
| C(103) – C(26) – C(102)   | 121.9(7)     | C(103) – C(26) – H(26)    | 119.1        |
| C(102) – C(26) – H(26)    | 119.1        | C(202) – C(204) – C(018)  | 120.6(7)     |
| C(202) – C(204) – C(209)  | 120.2(10)    | C(018) – C(204) – C(209)  | 119.2(10)    |
| C(102) – C(28) – C(105)   | 119.4(7)     | C(102) – C(28) – H(28)    | 120.3        |
| C(105) – C(28) – H(28)    | 120.3        | C(2) – Pd(2) – P(21)      | 85.69(19)    |
| C(2) – Pd(2) – P(22)      | 85.98(19)    | P(21) – Pd(2) – P(22)     | 163.48(7)    |
| C(2) – Pd(2) – I(2)       | 177.6(2)     | P(21) – Pd(2) – I(2)      | 92.28(5)     |
| P(22) – Pd(2) – I(2)      | 96.29(5)     | C(120) – B(2) – C(211)    | 111.0(6)     |
| C(120) – B(2) – C(127)    | 110.0(6)     | C(211) – B(2) – C(127)    | 107.4(6)     |
| C(120) – B(2) – C(208)    | 108.9(9)     | C(211) – B(2) – C(208)    | 109.9(9)     |
| C(127) – B(2) – C(208)    | 109.6(8)     | G(21) – C(2) – C(22)      | 116.9(6)     |
| G(21) – C(2) – P(23)      | 105.8(5)     | C(22) – C(2) – P(23)      | 109.5(5)     |
| G(21) – C(2) – Pd(2)      | 114.0(4)     | C(22) – C(2) – Pd(2)      | 106.6(4)     |
| P(23) – C(2) – Pd(2)      | 103.2(3)     | C(018) – C(205) – C(206)  | 120.9(7)     |
| C(018) – C(205) – C(129)  | 121.8(10)    | C(206) – C(205) – C(129)  | 117.3(10)    |
| C(203) – C(206) – C(205)  | 121.1(7)     | C(203) – C(206) – H(206)  | 119.4        |
| C(205) – C(206) – H(206)  | 119.4        | C(32) – C(31) – C(33)     | 111.4(7)     |
| C(32) – C(31) – P(2)      | 112.9(7)     | C(33) – C(31) – P(2)      | 114.7(6)     |
| C(32) – C(31) – H(31)     | 105.6        | C(33) – C(31) – H(31)     | 105.6        |
| P(2) – C(31) – H(31)      | 105.6        | C(31) – C(32) – H(32A)    | 109.5        |
| C(31) – C(32) – H(32B)    | 109.5        | H(32A) – C(32) – H(32B)   | 109.5        |
| C(31) – C(32) – H(32C)    | 109.5        | H(32A) – C(32) – H(32C)   | 109.5        |
| H(32B) – C(32) – H(32C)   | 109.5        | C(31) – C(33) – H(33A)    | 109.5        |
| C(31) – C(33) – H(33B)    | 109.5        | H(33A) – C(33) – H(33B)   | 109.5        |
| C(31) – C(33) – H(33C)    | 109.5        | H(33A) – C(33) – H(33C)   | 109.5        |
| H(33B) – C(33) – H(33C)   | 109.5        | C(35) – C(34) – C(36)     | 110.6(7)     |
| C(35) – C(34) – P(2)      | 110.9(5)     | C(36) – C(34) – P(2)      | 116.1(6)     |
| C(35) – C(34) – H(34)     | 106.2        | C(36) – C(34) – H(34)     | 106.2        |
| P(2) – C(34) – H(34)      | 106.2        | C(110) – C(207) – C(109)  | 121.3(8)     |
| C(110) – C(207) – H(207)  | 119.4        | C(109) – C(207) – H(207)  | 119.4        |
| C(34) – C(36) – H(36A)    | 109.5        | C(34) – C(36) – H(36B)    | 109.5        |
| H(36A) – C(36) – H(36B)   | 109.5        | C(34) – C(36) – H(36C)    | 109.5        |
| H(36A) – C(36) – H(36C)   | 109.5        | H(36B) – C(36) – H(36C)   | 109.5        |
| C(34) – C(35) – H(35A)    | 109.5        | C(34) – C(35) – H(35B)    | 109.5        |
| H(35A) – C(35) – H(35B)   | 109.5        | C(34) – C(35) – H(35C)    | 109.5        |

Continued on next page

**Table S45.** – continued from previous page

| <b>atom – atom – atom</b> | <b>angle</b> | <b>atom – atom – atom</b> | <b>angle</b> |
|---------------------------|--------------|---------------------------|--------------|
| H(35A) – C(35) – H(35C)   | 109.5        | H(35B) – C(35) – H(35C)   | 109.5        |
| C(38) – C(37) – C(39)     | 109.3(8)     | C(38) – C(37) – P(1)      | 110.8(6)     |
| C(39) – C(37) – P(1)      | 112.8(6)     | C(38) – C(37) – H(37)     | 107.9        |
| C(39) – C(37) – H(37)     | 107.9        | P(1) – C(37) – H(37)      | 107.9        |
| C(37) – C(38) – H(38A)    | 109.5        | C(37) – C(38) – H(38B)    | 109.5        |
| H(38A) – C(38) – H(38B)   | 109.5        | C(37) – C(38) – H(38C)    | 109.5        |
| H(38A) – C(38) – H(38C)   | 109.5        | H(38B) – C(38) – H(38C)   | 109.5        |
| C(37) – C(39) – H(39A)    | 109.5        | C(37) – C(39) – H(39B)    | 109.5        |
| H(39A) – C(39) – H(39B)   | 109.5        | C(37) – C(39) – H(39C)    | 109.5        |
| H(39A) – C(39) – H(39C)   | 109.5        | H(39B) – C(39) – H(39C)   | 109.5        |
| C(18) – C(208) – C(17)    | 116.2(16)    | C(18) – C(208) – B(2)     | 124.3(15)    |
| C(17) – C(208) – B(2)     | 119.5(14)    | F(22) – C(209) – F(21)    | 118.4(14)    |
| F(22) – C(209) – F(20)    | 94.3(12)     | F(21) – C(209) – F(20)    | 95.4(13)     |
| F(22) – C(209) – C(204)   | 117.3(13)    | F(21) – C(209) – C(204)   | 115.4(13)    |
| F(20) – C(209) – C(204)   | 110.4(14)    | C(18) – C(210) – C(16)    | 121.3(18)    |
| C(18) – C(210) – C(150)   | 121.3(17)    | C(16) – C(210) – C(150)   | 117.2(15)    |
| C(94) – C(211) – C(96)    | 115.3(8)     | C(94) – C(211) – B(2)     | 124.2(7)     |
| C(96) – C(211) – B(2)     | 120.5(7)     | C(42) – C(40) – C(41)     | 110.1(8)     |
| C(42) – C(40) – P(1)      | 109.7(6)     | C(41) – C(40) – P(1)      | 114.8(6)     |
| C(42) – C(40) – H(40)     | 107.3        | C(41) – C(40) – H(40)     | 107.3        |
| P(1) – C(40) – H(40)      | 107.3        | C(94) – C(212) – C(95)    | 120.1(9)     |
| C(94) – C(212) – C(154)   | 120.2(8)     | C(95) – C(212) – C(154)   | 119.6(8)     |
| C(40) – C(42) – H(42A)    | 120.0        | C(40) – C(42) – H(42B)    | 120.0        |
| H(42A) – C(42) – H(42B)   | 120.0        | C(40) – C(41) – H(41A)    | 109.5        |
| C(40) – C(41) – H(41B)    | 109.5        | H(41A) – C(41) – H(41B)   | 109.5        |
| C(40) – C(41) – H(41C)    | 109.5        | H(41A) – C(41) – H(41C)   | 109.5        |
| H(41B) – C(41) – H(41C)   | 109.5        | C(45) – C(44) – C(101)    | 123.0(8)     |
| C(45) – C(44) – H(44)     | 118.5        | C(101) – C(44) – H(44)    | 118.5        |
| C(44) – C(45) – C(46)     | 116.3(7)     | C(44) – C(45) – C(48)     | 121.9(8)     |
| C(46) – C(45) – C(48)     | 121.8(7)     | C(47) – C(46) – C(45)     | 120.6(7)     |
| C(47) – C(46) – H(46)     | 119.7        | C(45) – C(46) – H(46)     | 119.7        |
| C(150) – F(46) – F(47)    | 47.6(10)     | C(107) – C(213) – C(109)  | 118.3(8)     |
| C(107) – C(213) – H(213)  | 120.9        | C(109) – C(213) – H(213)  | 120.9        |
| C(46) – C(47) – C(11)     | 122.8(7)     | C(46) – C(47) – H(47)     | 118.6        |
| C(11) – C(47) – H(47)     | 118.6        | C(150) – F(47) – F(46)    | 51.1(10)     |
| C(51) – C(48) – C(45)     | 111.8(8)     | C(51) – C(48) – C(50)     | 112.5(10)    |
| C(45) – C(48) – C(50)     | 112.4(8)     | C(51) – C(48) – C(49)     | 107.3(10)    |
| C(45) – C(48) – C(49)     | 105.0(8)     | C(50) – C(48) – C(49)     | 107.4(9)     |
| C(48) – C(49) – H(49A)    | 109.5        | C(48) – C(49) – H(49B)    | 109.5        |
| H(49A) – C(49) – H(49B)   | 109.5        | C(48) – C(49) – H(49C)    | 109.5        |
| H(49A) – C(49) – H(49C)   | 109.5        | H(49B) – C(49) – H(49C)   | 109.5        |
| C(95) – C(214) – C(153)   | 117.2(13)    | C(95) – C(214) – C(96)    | 123.0(10)    |
| C(153) – C(214) – C(96)   | 119.7(13)    | C(48) – C(50) – H(50A)    | 109.5        |
| C(48) – C(50) – H(50B)    | 109.5        | H(50A) – C(50) – H(50B)   | 109.5        |
| C(48) – C(50) – H(50C)    | 109.5        | H(50A) – C(50) – H(50C)   | 109.5        |
| H(50B) – C(50) – H(50C)   | 109.5        | C(48) – C(51) – H(51A)    | 109.5        |
| C(48) – C(51) – H(51B)    | 109.5        | H(51A) – C(51) – H(51B)   | 109.5        |
| C(48) – C(51) – H(51C)    | 109.5        | H(51A) – C(51) – H(51C)   | 109.5        |
| H(51B) – C(51) – H(51C)   | 109.5        | C(100) – C(53) – C(54)    | 121.7(7)     |
| C(100) – C(53) – H(53)    | 119.1        | C(54) – C(53) – H(53)     | 119.1        |
| C(55) – C(54) – C(53)     | 116.5(7)     | C(55) – C(54) – C(57)     | 123.7(7)     |

Continued on next page

**Table S45.** – continued from previous page

| <b>atom – atom – atom</b> | <b>angle</b> | <b>atom – atom – atom</b> | <b>angle</b> |
|---------------------------|--------------|---------------------------|--------------|
| C(53) – C(54) – C(57)     | 119.8(7)     | C(55) – C(56) – C(21)     | 122.3(7)     |
| C(55) – C(56) – H(56)     | 118.9        | C(21) – C(56) – H(56)     | 118.9        |
| C(56) – C(55) – C(54)     | 121.8(7)     | C(56) – C(55) – H(55)     | 119.1        |
| C(54) – C(55) – H(55)     | 119.1        | C(60) – C(57) – C(59)     | 107.4(7)     |
| C(60) – C(57) – C(58)     | 109.5(7)     | C(59) – C(57) – C(58)     | 109.6(7)     |
| C(60) – C(57) – C(54)     | 112.0(7)     | C(59) – C(57) – C(54)     | 111.1(6)     |
| C(58) – C(57) – C(54)     | 107.3(6)     | C(57) – C(58) – H(58A)    | 109.5        |
| C(57) – C(58) – H(58B)    | 109.5        | H(58A) – C(58) – H(58B)   | 109.5        |
| C(57) – C(58) – H(58C)    | 109.5        | H(58A) – C(58) – H(58C)   | 109.5        |
| H(58B) – C(58) – H(58C)   | 109.5        | C(57) – C(59) – H(59A)    | 109.5        |
| C(57) – C(59) – H(59B)    | 109.5        | H(59A) – C(59) – H(59B)   | 109.5        |
| C(57) – C(59) – H(59C)    | 109.5        | H(59A) – C(59) – H(59C)   | 109.5        |
| H(59B) – C(59) – H(59C)   | 109.5        | C(107) – C(215) – C(110)  | 119.4(8)     |
| C(107) – C(215) – H(215)  | 120.3        | C(110) – C(215) – H(215)  | 120.3        |
| C(57) – C(60) – H(60A)    | 109.5        | C(57) – C(60) – H(60B)    | 109.5        |
| H(60A) – C(60) – H(60B)   | 109.5        | C(57) – C(60) – H(60C)    | 109.5        |
| H(60A) – C(60) – H(60C)   | 109.5        | H(60B) – C(60) – H(60C)   | 109.5        |
| C(63) – C(61) – C(62)     | 110.9(6)     | C(63) – C(61) – P(22)     | 117.2(6)     |
| C(62) – C(61) – P(22)     | 110.4(5)     | C(63) – C(61) – H(61)     | 105.9        |
| C(62) – C(61) – H(61)     | 105.9        | P(22) – C(61) – H(61)     | 105.9        |
| C(61) – C(62) – H(62A)    | 109.5        | C(61) – C(62) – H(62B)    | 109.5        |
| H(62A) – C(62) – H(62B)   | 109.5        | C(61) – C(62) – H(62C)    | 109.5        |
| H(62A) – C(62) – H(62C)   | 109.5        | H(62B) – C(62) – H(62C)   | 109.5        |
| C(61) – C(63) – H(63A)    | 109.5        | C(61) – C(63) – H(63B)    | 109.5        |
| H(63A) – C(63) – H(63B)   | 109.5        | C(61) – C(63) – H(63C)    | 109.5        |
| H(63A) – C(63) – H(63C)   | 109.5        | H(63B) – C(63) – H(63C)   | 109.5        |
| C(65) – C(64) – C(66)     | 110.7(8)     | C(65) – C(64) – P(22)     | 116.0(6)     |
| C(66) – C(64) – P(22)     | 110.9(6)     | C(65) – C(64) – H(64)     | 106.2        |
| C(66) – C(64) – H(64)     | 106.2        | P(22) – C(64) – H(64)     | 106.2        |
| C(64) – C(65) – H(65A)    | 109.5        | C(64) – C(65) – H(65B)    | 109.5        |
| H(65A) – C(65) – H(65B)   | 109.5        | C(64) – C(65) – H(65C)    | 109.5        |
| H(65A) – C(65) – H(65C)   | 109.5        | H(65B) – C(65) – H(65C)   | 109.5        |
| C(64) – C(66) – H(66A)    | 109.5        | C(64) – C(66) – H(66B)    | 109.5        |
| H(66A) – C(66) – H(66B)   | 109.5        | C(64) – C(66) – H(66C)    | 109.5        |
| H(66A) – C(66) – H(66C)   | 109.5        | H(66B) – C(66) – H(66C)   | 109.5        |
| C(70) – C(67) – H(67A)    | 109.5        | C(70) – C(67) – H(67B)    | 109.5        |
| H(67A) – C(67) – H(67B)   | 109.5        | C(70) – C(67) – H(67C)    | 109.5        |
| H(67A) – C(67) – H(67C)   | 109.5        | H(67B) – C(67) – H(67C)   | 109.5        |
| C(70) – C(68) – H(68A)    | 109.5        | C(70) – C(68) – H(68B)    | 109.5        |
| H(68A) – C(68) – H(68B)   | 109.5        | C(70) – C(68) – H(68C)    | 109.5        |
| H(68A) – C(68) – H(68C)   | 109.5        | H(68B) – C(68) – H(68C)   | 109.5        |
| C(70) – C(69) – H(69A)    | 109.5        | C(70) – C(69) – H(69B)    | 109.5        |
| H(69A) – C(69) – H(69B)   | 109.5        | C(70) – C(69) – H(69C)    | 109.5        |
| H(69A) – C(69) – H(69C)   | 109.5        | H(69B) – C(69) – H(69C)   | 109.5        |
| C(69) – C(70) – C(71)     | 115.1(8)     | C(69) – C(70) – C(68)     | 115.4(12)    |
| C(71) – C(70) – C(68)     | 109.6(8)     | C(69) – C(70) – C(67)     | 104.8(11)    |
| C(71) – C(70) – C(67)     | 107.4(7)     | C(68) – C(70) – C(67)     | 103.5(8)     |
| C(72) – C(71) – C(75)     | 116.1(7)     | C(72) – C(71) – C(70)     | 123.6(7)     |
| C(75) – C(71) – C(70)     | 120.2(7)     | C(71) – C(72) – C(73)     | 122.5(7)     |
| C(71) – C(72) – H(72)     | 118.8        | C(73) – C(72) – H(72)     | 118.8        |
| C(72) – C(73) – C(22)     | 121.9(7)     | C(72) – C(73) – P(22)     | 121.4(6)     |

Continued on next page



**Table S45.** – continued from previous page

| <b>atom – atom – atom</b> | <b>angle</b> | <b>atom – atom – atom</b> | <b>angle</b> |
|---------------------------|--------------|---------------------------|--------------|
| C(22) – C(73) – P(22)     | 115.9(6)     | C(75) – C(74) – C(22)     | 122.5(7)     |
| C(75) – C(74) – H(74)     | 118.8        | C(22) – C(74) – H(74)     | 118.8        |
| C(74) – C(75) – C(71)     | 120.1(7)     | C(74) – C(75) – H(75)     | 119.9        |
| C(71) – C(75) – H(75)     | 119.9        | C(79) – C(76) – H(76A)    | 109.5        |
| C(79) – C(76) – H(76B)    | 109.5        | H(76A) – C(76) – H(76B)   | 109.5        |
| C(79) – C(76) – H(76C)    | 109.5        | H(76A) – C(76) – H(76C)   | 109.5        |
| H(76B) – C(76) – H(76C)   | 109.5        | C(79) – C(77) – H(77A)    | 109.5        |
| C(79) – C(77) – H(77B)    | 109.5        | H(77A) – C(77) – H(77B)   | 109.5        |
| C(79) – C(77) – H(77C)    | 109.5        | H(77A) – C(77) – H(77C)   | 109.5        |
| H(77B) – C(77) – H(77C)   | 109.5        | C(79) – C(78) – H(78A)    | 109.5        |
| C(79) – C(78) – H(78B)    | 109.5        | H(78A) – C(78) – H(78B)   | 109.5        |
| C(79) – C(78) – H(78C)    | 109.5        | H(78A) – C(78) – H(78C)   | 109.5        |
| H(78B) – C(78) – H(78C)   | 109.5        | C(76) – C(79) – C(77)     | 115.7(10)    |
| C(76) – C(79) – C(80)     | 108.0(8)     | C(77) – C(79) – C(80)     | 108.7(8)     |
| C(76) – C(79) – C(78)     | 107.3(10)    | C(77) – C(79) – C(78)     | 106.3(10)    |
| C(80) – C(79) – C(78)     | 110.9(8)     | C(81) – C(80) – C(84)     | 116.6(6)     |
| C(81) – C(80) – C(79)     | 121.9(7)     | C(84) – C(80) – C(79)     | 121.6(7)     |
| C(80) – C(81) – C(82)     | 121.2(7)     | C(80) – C(81) – H(81)     | 119.4        |
| C(82) – C(81) – H(81)     | 119.4        | G(21) – C(82) – C(81)     | 121.3(7)     |
| G(21) – C(82) – P(21)     | 116.5(5)     | C(81) – C(82) – P(21)     | 122.3(5)     |
| C(84) – C(83) – G(21)     | 120.0(7)     | C(84) – C(83) – H(83)     | 120.0        |
| G(21) – C(83) – H(83)     | 120.0        | C(80) – C(84) – C(83)     | 123.7(7)     |
| C(80) – C(84) – H(84)     | 118.2        | C(83) – C(84) – H(84)     | 118.2        |
| C(86) – C(85) – C(90)     | 112.7(9)     | C(86) – C(85) – P(21)     | 114.6(7)     |
| C(90) – C(85) – P(21)     | 110.6(6)     | C(86) – C(85) – H(85)     | 106.0        |
| C(90) – C(85) – H(85)     | 106.0        | P(21) – C(85) – H(85)     | 106.0        |
| C(85) – C(86) – H(86A)    | 109.5        | C(85) – C(86) – H(86B)    | 109.5        |
| H(86A) – C(86) – H(86B)   | 109.5        | C(85) – C(86) – H(86C)    | 109.5        |
| H(86A) – C(86) – H(86C)   | 109.5        | H(86B) – C(86) – H(86C)   | 109.5        |
| C(89) – C(87) – C(88)     | 109.8(8)     | C(89) – C(87) – P(21)     | 119.6(9)     |
| C(88) – C(87) – P(21)     | 108.9(6)     | C(89) – C(87) – H(87)     | 105.9        |
| C(88) – C(87) – H(87)     | 105.9        | P(21) – C(87) – H(87)     | 105.9        |
| C(87) – C(88) – H(88A)    | 120.0        | C(87) – C(88) – H(88B)    | 120.0        |
| H(88A) – C(88) – H(88B)   | 120.0        | C(87) – C(89) – H(89A)    | 109.5        |
| C(87) – C(89) – H(89B)    | 109.5        | H(89A) – C(89) – H(89B)   | 109.5        |
| C(87) – C(89) – H(89C)    | 109.5        | H(89A) – C(89) – H(89C)   | 109.5        |
| H(89B) – C(89) – H(89C)   | 109.5        | C(85) – C(90) – H(90A)    | 109.5        |
| C(85) – C(90) – H(90B)    | 109.5        | H(90A) – C(90) – H(90B)   | 109.5        |
| C(85) – C(90) – H(90C)    | 109.5        | H(90A) – C(90) – H(90C)   | 109.5        |
| H(90B) – C(90) – H(90C)   | 109.5        | C(121) – C(91) – C(118)   | 119.5(8)     |
| C(121) – C(91) – H(91)    | 120.3        | C(118) – C(91) – H(91)    | 120.3        |
| C(121) – C(92) – C(120)   | 124.9(7)     | C(121) – C(92) – H(92)    | 117.6        |
| C(120) – C(92) – H(92)    | 117.6        | C(118) – C(93) – C(120)   | 123.1(7)     |
| C(118) – C(93) – H(93)    | 118.4        | C(120) – C(93) – H(93)    | 118.4        |
| C(211) – C(94) – C(212)   | 122.8(8)     | C(211) – C(94) – H(94)    | 118.6        |
| C(212) – C(94) – H(94)    | 118.6        | C(214) – C(95) – C(212)   | 117.1(9)     |
| C(214) – C(95) – H(95)    | 121.5        | C(212) – C(95) – H(95)    | 121.5        |
| C(211) – C(96) – C(214)   | 121.5(9)     | C(211) – C(96) – H(96)    | 119.2        |
| C(214) – C(96) – H(96)    | 119.2        | C(124) – C(97) – C(127)   | 122.5(7)     |
| C(124) – C(97) – H(97)    | 118.8        | C(127) – C(97) – H(97)    | 118.8        |
| C(124) – C(98) – C(125)   | 116.4(8)     | C(124) – C(98) – H(98)    | 121.8        |

Continued on next page

**Table S45.** – continued from previous page

| <b>atom – atom – atom</b> | <b>angle</b> | <b>atom – atom – atom</b> | <b>angle</b> |
|---------------------------|--------------|---------------------------|--------------|
| C(125) – C(98) – H(98)    | 121.8        | C(127) – C(99) – C(125)   | 122.5(7)     |
| C(127) – C(99) – H(99)    | 118.7        | C(125) – C(99) – H(99)    | 118.7        |
| C(53) – C(100) – C(21)    | 120.8(6)     | C(53) – C(100) – P(2)     | 122.0(5)     |
| C(21) – C(100) – P(2)     | 116.5(5)     | C(11) – C(101) – C(44)    | 120.3(7)     |
| C(11) – C(101) – P(1)     | 116.4(6)     | C(44) – C(101) – P(1)     | 123.1(6)     |
| C(26) – C(102) – C(28)    | 117.2(7)     | C(26) – C(102) – B(1)     | 121.4(6)     |
| C(28) – C(102) – B(1)     | 121.3(6)     | C(27) – C(103) – C(26)    | 120.4(7)     |
| C(27) – C(103) – C(104)   | 121.6(7)     | C(26) – C(103) – C(104)   | 118.0(7)     |
| F(7) – C(104) – F(9)      | 109.1(7)     | F(7) – C(104) – F(8)      | 103.8(7)     |
| F(9) – C(104) – F(8)      | 103.9(6)     | F(7) – C(104) – C(103)    | 114.4(7)     |
| F(9) – C(104) – C(103)    | 114.2(7)     | F(8) – C(104) – C(103)    | 110.5(7)     |
| C(27) – C(105) – C(28)    | 121.6(7)     | C(27) – C(105) – C(106)   | 121.6(7)     |
| C(28) – C(105) – C(106)   | 116.6(7)     | F(11) – C(106) – F(13)    | 107.3(8)     |
| F(11) – C(106) – F(12)    | 102.1(8)     | F(13) – C(106) – F(12)    | 106.3(8)     |
| F(11) – C(106) – C(105)   | 115.5(8)     | F(13) – C(106) – C(105)   | 112.5(7)     |
| F(12) – C(106) – C(105)   | 112.2(8)     | C(215) – C(107) – C(213)  | 122.4(9)     |
| C(215) – C(107) – C(108)  | 122.2(9)     | C(213) – C(107) – C(108)  | 115.3(10)    |
| F(2) – C(108) – F(1)      | 105.6(10)    | F(2) – C(108) – F(3)      | 104.4(14)    |
| F(1) – C(108) – F(3)      | 105.1(12)    | F(2) – C(108) – C(107)    | 113.5(12)    |
| F(1) – C(108) – C(107)    | 111.6(13)    | F(3) – C(108) – C(107)    | 115.7(11)    |
| C(207) – C(109) – C(213)  | 117.9(7)     | C(207) – C(109) – B(1)    | 122.9(7)     |
| C(213) – C(109) – B(1)    | 119.1(7)     | C(207) – C(110) – C(215)  | 120.6(9)     |
| C(207) – C(110) – C(111)  | 119.5(10)    | C(215) – C(110) – C(111)  | 119.6(9)     |
| F(4) – C(111) – F(6)      | 106.1(10)    | F(4) – C(111) – F(5)      | 100.3(9)     |
| F(6) – C(111) – F(5)      | 107.7(11)    | F(4) – C(111) – C(110)    | 116.3(11)    |
| F(6) – C(111) – C(110)    | 113.5(10)    | F(5) – C(111) – C(110)    | 111.8(10)    |
| C(017) – C(112) – C(201)  | 120.9(6)     | C(017) – C(112) – C(113)  | 121.0(6)     |
| C(201) – C(112) – C(113)  | 118.0(6)     | F(19) – C(113) – F(17)    | 107.7(6)     |
| F(19) – C(113) – F(18)    | 104.9(5)     | F(17) – C(113) – F(18)    | 105.1(6)     |
| F(19) – C(113) – C(112)   | 114.4(6)     | F(17) – C(113) – C(112)   | 112.4(6)     |
| F(18) – C(113) – C(112)   | 111.6(6)     | F(14) – C(114) – F(16)    | 105.6(9)     |
| F(14) – C(114) – F(15)    | 105.9(8)     | F(16) – C(114) – F(15)    | 102.9(8)     |
| F(14) – C(114) – C(115)   | 115.4(9)     | F(16) – C(114) – C(115)   | 112.9(8)     |
| F(15) – C(114) – C(115)   | 113.0(9)     | C(201) – C(115) – C(200)  | 121.3(6)     |
| C(201) – C(115) – C(114)  | 118.7(8)     | C(200) – C(115) – C(114)  | 119.9(7)     |
| C(200) – C(117) – C(017)  | 117.5(6)     | C(200) – C(117) – B(1)    | 122.1(6)     |
| C(017) – C(117) – B(1)    | 120.4(6)     | C(91) – C(118) – C(93)    | 120.3(8)     |
| C(91) – C(118) – C(128)   | 121.2(8)     | C(93) – C(118) – C(128)   | 118.4(7)     |
| C(92) – C(120) – C(93)    | 113.0(7)     | C(92) – C(120) – B(2)     | 124.7(7)     |
| C(93) – C(120) – B(2)     | 122.1(6)     | C(91) – C(121) – C(92)    | 119.2(7)     |
| C(91) – C(121) – C(122)   | 120.5(12)    | C(92) – C(121) – C(122)   | 120.3(12)    |
| F(38) – C(122) – F(37)    | 109.0(18)    | F(38) – C(122) – F(36)    | 99.9(13)     |
| F(37) – C(122) – F(36)    | 106.3(15)    | F(38) – C(122) – C(121)   | 114.8(14)    |
| F(37) – C(122) – C(121)   | 112.9(13)    | F(36) – C(122) – C(121)   | 112.8(17)    |
| F(32) – C(123) – F(30)    | 110.6(9)     | F(32) – C(123) – F(31)    | 106.7(8)     |
| F(30) – C(123) – F(31)    | 102.5(8)     | F(32) – C(123) – C(124)   | 113.8(8)     |
| F(30) – C(123) – C(124)   | 112.8(8)     | F(31) – C(123) – C(124)   | 109.6(8)     |
| C(98) – C(124) – C(97)    | 122.0(7)     | C(98) – C(124) – C(123)   | 118.8(7)     |
| C(97) – C(124) – C(123)   | 119.2(7)     | C(98) – C(125) – C(99)    | 121.6(7)     |
| C(98) – C(125) – C(126)   | 117.1(11)    | C(99) – C(125) – C(126)   | 121.3(11)    |
| F(63) – C(126) – F(65)    | 100.5(15)    | F(63) – C(126) – F(64)    | 105.7(14)    |

Continued on next page

**Table S45.** – continued from previous page

| <b>atom – atom – atom</b> | <b>angle</b> | <b>atom – atom – atom</b> | <b>angle</b> |
|---------------------------|--------------|---------------------------|--------------|
| F(65) – C(126) – F(64)    | 101.4(14)    | F(63) – C(126) – C(125)   | 118.5(15)    |
| F(65) – C(126) – C(125)   | 114.4(15)    | F(64) – C(126) – C(125)   | 114.2(15)    |
| C(99) – C(127) – C(97)    | 115.0(6)     | C(99) – C(127) – B(2)     | 123.5(6)     |
| C(97) – C(127) – B(2)     | 121.4(6)     | F(34) – C(128) – F(33)    | 106.1(7)     |
| F(34) – C(128) – F(35)    | 110.0(8)     | F(33) – C(128) – F(35)    | 102.3(9)     |
| F(34) – C(128) – C(118)   | 111.2(9)     | F(33) – C(128) – C(118)   | 114.4(7)     |
| F(35) – C(128) – C(118)   | 112.4(7)     | F(24) – C(129) – F(26)    | 120.9(16)    |
| F(24) – C(129) – F(25)    | 99.3(14)     | F(26) – C(129) – F(25)    | 89.8(12)     |
| F(24) – C(129) – C(205)   | 118.6(14)    | F(26) – C(129) – C(205)   | 111.7(14)    |
| F(25) – C(129) – C(205)   | 110.8(15)    | F(250) – C(150) – F(47)   | 94.0(17)     |
| F(250) – C(150) – F(46)   | 131.3(15)    | F(47) – C(150) – F(46)    | 81.3(13)     |
| F(250) – C(150) – C(210)  | 113.0(16)    | F(47) – C(150) – C(210)   | 108.4(16)    |
| F(46) – C(150) – C(210)   | 114.5(16)    | F(43) – C(151) – F(45)    | 115.3(16)    |
| F(43) – C(151) – C(152)   | 120.2(15)    | F(45) – C(151) – C(152)   | 120.9(16)    |
| F(43) – C(151) – F(44)    | 90.9(15)     | F(45) – C(151) – F(44)    | 91.7(14)     |
| C(152) – C(151) – F(44)   | 105.9(16)    | C(16) – C(152) – C(17)    | 123.4(18)    |
| C(16) – C(152) – C(151)   | 115.0(15)    | C(17) – C(152) – C(151)   | 121.6(17)    |
| F(41) – C(153) – F(39)    | 100(2)       | F(41) – C(153) – F(40)    | 104(2)       |
| F(39) – C(153) – F(40)    | 101.0(19)    | F(41) – C(153) – C(214)   | 115(2)       |
| F(39) – C(153) – C(214)   | 119(2)       | F(40) – C(153) – C(214)   | 116(2)       |
| F(28) – C(154) – F(27)    | 106.2(9)     | F(28) – C(154) – F(29)    | 114.5(10)    |
| F(27) – C(154) – F(29)    | 104.1(9)     | F(28) – C(154) – C(212)   | 110.9(8)     |
| F(27) – C(154) – C(212)   | 109.0(9)     | F(29) – C(154) – C(212)   | 111.7(9)     |
